# Supplementary material for: Intravenously delivered Multilineage-differentiating stress enduring cells dampen in experimental bronchopulmonary dysplasia rat model
Source: Research Square preprint supplement (doi:10.21203/rs.3.rs-7875937/v1), 2025-11-04
Supplement: Supplementary file 1 [file 120f16ce16650974a62c56f6.xlsx]

## Sheet: SwissProt_Rat
Accession	Description	MW [kDa]	Area																																Score
			#01: S1	#02: S2	#03: S3	#04: S4	#05: S5	#06: S6	#07: S7	#08: S8	#09: V1	#10: V2	#11: V3	#12: V4	#13: V5	#14: V6	#15: V7	#16: V8	#17: n1	#18: n2	#19: n3	#20: n4	#21: n5	#22: n6	#23: n7	#24: n8	#25: M1	#26: M2	#27: M3	#28: M4	#29: M5	#30: M6	#31: M7	#32: M8	#01: S1	#02: S2	#03: S3	#04: S4	#05: S5	#06: S6	#07: S7	#08: S8	#09: V1	#10: V2	#11: V3	#12: V4	#13: V5	#14: V6	#15: V7
P02770	Serum albumin OS=Rattus norvegicus GN=Alb PE=1 SV=2 - [ALBU_RAT]	68.6861	9.48098e+10	1.00667e+11	9.25333e+10	1.19143e+11	120891217407	100440960573	1.01207e+11	118821484668	1.27829e+11	1.01042e+11	1.15645e+11	1.29345e+11	1.46503e+11	1.16009e+11	1.62741e+11	1.68232e+11	1.20175e+11	1.01666e+11	1.42634e+11	1.37316e+11	1.51421e+11	1.12246e+11	1.76517e+11	1.68634e+11	1.3087e+11	1.09453e+11	1.55916e+11	1.20365e+11	1.51395e+11	1.73074e+11	1.71333e+11	1.36401e+11	96749.5	92585.9	114792	103993	104341	95878.1	122564	117788	107756	122708	146845	129586	116795	131821	141088
P02091	Hemoglobin subunit beta-1 OS=Rattus norvegicus GN=Hbb PE=1 SV=3 - [HBB1_RAT]	15.9692	8.47345e+10	1.11968e+11	8.11827e+10	141548611410	1.74964e+11	1.52684e+11	1.49733e+11	1.30027e+11	1.18582e+11	7.58266e+10	104636354877	9.4315e+10	1.20512e+11	1.04762e+11	1.50818e+11	1.32226e+11	9.39756e+10	71294063762	1.06647e+11	112396368516	1.17467e+11	9.04952e+10	1.08042e+11	1.22007e+11	113118469432	1.09233e+11	1.09035e+11	102259222268	1.04605e+11	1.1749e+11	1.16884e+11	104581083207	54051.4	65176.2	71338.3	90866.4	87021.6	84978.1	92918.4	83279.2	32420.3	28272.4	52399.9	41917.9	39412.8	39903.1	45633.9
P01946	Hemoglobin subunit alpha-1/2 OS=Rattus norvegicus GN=Hba1 PE=1 SV=3 - [HBA_RAT]	15.3188	7.58229e+10	7.07644e+10	8.32293e+10	1.06908e+11	9.64017e+10	9.48593e+10	9.04465e+10	7.93566e+10	8.64019e+10	5.82908e+10	9.05173e+10	9.43274e+10	6.85964e+10	6.49615e+10	9.71585e+10	7.53522e+10	71162791742	4.49218e+10	77979609399	7.60211e+10	67472115323	6.25455e+10	9.62676e+10	7.81143e+10	7.16695e+10	6.56786e+10	9.38925e+10	9.30644e+10	6.84653e+10	8.56937e+10	8.92106e+10	7.02514e+10	51381.6	76429.8	71338.5	80410.1	81914.8	74621.3	75569.5	71074.6	43727	43259.7	58221.2	61058.5	53887.9	50622.1	58255.9
P11517	Hemoglobin subunit beta-2 OS=Rattus norvegicus PE=1 SV=2 - [HBB2_RAT]	15.9723	77031950893	8.93414e+10	8.11827e+10	113118946278	1.25863e+11	1.29754e+11	1.28214e+11	9.85118e+10	9.19105e+10	5.13387e+10	6.9908e+10	7.40976e+10	8.52363e+10	8.728e+10	1.1916e+11	87814979340	6.86059e+10	4.88325e+10	7.11528e+10	8.27392e+10	91280121203	6.29387e+10	8.36127e+10	9.12485e+10	7.86478e+10	7.00573e+10	7.58007e+10	7.03895e+10	7.41797e+10	78226542003	9.23248e+10	1.02643e+11	36207.2	43100	47222.9	57170.7	61162.6	61872.6	61123.9	54316.7	23570.2	19604.5	34900.7	29324.1	29181.8	31400.1	35497
P12346	Serotransferrin OS=Rattus norvegicus GN=Tf PE=1 SV=3 - [TRFE_RAT]	76.3456	1.41286e+10	1.37361e+10	1.54083e+10	1.58188e+10	1.73225e+10	14605055594	1.90354e+10	1.98753e+10	2.68366e+10	2.37926e+10	2.91795e+10	28913724590	2.98234e+10	24758783990	3.79015e+10	4.03532e+10	2.98623e+10	2.75189e+10	3.3831e+10	2.90306e+10	3.26867e+10	2.94574e+10	35788085065	3.68531e+10	2.74979e+10	29625090635	3.31471e+10	3.32062e+10	38064046032	3.75452e+10	37834713005	34662344035	33461.7	28424.3	34159.8	29831.2	32271.8	27808.4	35706.1	35016.7	37112.9	38714.6	41850.4	39565.9	38719.3	39968.2	44150.6
P85972	Vinculin OS=Rattus norvegicus GN=Vcl PE=1 SV=1 - [VINC_RAT]	116.542	3.74567e+09	3.72421e+09	4.28497e+09	5.11786e+09	4.44163e+09	4.9525e+09	4.98098e+09	4.1859e+09	4.20759e+09	3.89573e+09	4.5345e+09	4.56116e+09	4.47871e+09	3.95886e+09	6.14377e+09	6677318172	5.24055e+09	4.192e+09	5.45432e+09	4.78553e+09	6.045e+09	4.60602e+09	6.61082e+09	6.1339e+09	4.34334e+09	4.95174e+09	4.95718e+09	4.58975e+09	6.52385e+09	5626397018	6.35764e+09	5417675060	32179	29992.9	32786.8	31735.3	39088.9	33678.5	37917.1	37552.7	27627.8	27458	28336.7	30009.9	32110.9	30592.9	31862.8
P02773	Alpha-fetoprotein OS=Rattus norvegicus GN=Afp PE=2 SV=1 - [FETA_RAT]	68.3414	9.8904e+09	1.08249e+10	1.04583e+10	1.14356e+10	1.17135e+10	1.35009e+10	1.2184e+10	9.78469e+09	1.63143e+10	1.53202e+10	1.85072e+10	1.46186e+10	1.80681e+10	1.9276e+10	2.30269e+10	2.40063e+10	1.97364e+10	1.59238e+10	1.84959e+10	1.48995e+10	2.02798e+10	1.39865e+10	1.97428e+10	2.27411e+10	1.71132e+10	1.88737e+10	1.85027e+10	1.4398e+10	2.5109e+10	2.06242e+10	1.9791e+10	2.26957e+10	29149.1	29241.7	33374.5	31672.4	31277.1	29676.7	34559.9	35510.6	35635.5	38616.9	39200.2	38869.7	36994.7	39746.4	42168.4
P16086	Spectrin alpha chain, non-erythrocytic 1 OS=Rattus norvegicus GN=Sptan1 PE=1 SV=2 - [SPTN1_RAT]	284.462	5.10048e+08	5.39351e+08	6.47699e+08	1.07582e+09	7.65241e+08	9.43037e+08	6.91178e+08	7.31352e+08	8.41808e+08	5.87601e+08	6.94658e+08	1.21556e+09	7.67165e+08	7.09044e+08	7.96524e+08	8.68219e+08	7.3915e+08	6.21802e+08	1.77185e+10	7.75492e+08	8.55678e+08	7.20112e+08	1.04116e+09	8.94431e+08	5.60336e+08	6.26335e+08	5.56521e+08	1.32949e+09	768398430	8.44651e+08	9.45298e+08	1061868906	25701.2	24231.2	26619.8	26067.1	23360.8	24968.8	25520	26031.6	23591.5	23927.8	24096.9	25006.6	25141.4	23018.9	23552.6
P63018	Heat shock cognate 71 kDa protein OS=Rattus norvegicus GN=Hspa8 PE=1 SV=1 - [HSP7C_RAT]	70.8272	4.48891e+09	4.56189e+09	5.85124e+09	5.51647e+09	5.368e+09	5.05119e+09	6.60133e+09	6.55186e+09	5.20641e+09	4.72737e+09	6.10571e+09	5.83709e+09	5.80136e+09	5494663304	7575588569	7.7182e+09	5.80257e+09	5.57495e+09	6.84815e+09	6.2436e+09	6.808e+09	6.23658e+09	8.01714e+09	8.6487e+09	5.90892e+09	5.88388e+09	7.42166e+09	7.25844e+09	7.30791e+09	8.12788e+09	8964664066	8.1626e+09	18799.5	19566.7	21988.7	18861.8	20340.8	20571.9	22648.5	19563	21366.9	21806.8	21632.8	18989.5	20235	21379.7	20459.9
Q5U300	Ubiquitin-like modifier-activating enzyme 1 OS=Rattus norvegicus GN=Uba1 PE=1 SV=1 - [UBA1_RAT]	117.713	8.07235e+08	712839893	9.08082e+08	9.86467e+08	9.39815e+08	8.97065e+08	9.45669e+08	1.00635e+09	7.79348e+08	6.6322e+08	7.78279e+08	8.70347e+08	8.35592e+08	763547596	981610683	1.15934e+09	9.57369e+08	8.40958e+08	8.6534e+08	1.12216e+09	9.69434e+08	8.42004e+08	1.0666e+09	1.15134e+09	8.73084e+08	1.04107e+09	9.82014e+08	8.94212e+08	1272988243	1093972611	1.25426e+09	1.13558e+09	17237.8	14471.1	17735.7	17065.2	17326.6	13805.5	18634.6	17899.4	12175.2	13083.7	13067.5	13914.5	12509.2	12448.8	13758.2
Q63041	Alpha-1-macroglobulin OS=Rattus norvegicus GN=A1m PE=1 SV=1 - [A1M_RAT]	167.019	1.21805e+09	1.37049e+09	1.40205e+09	1.84129e+09	1.70466e+09	1.68873e+09	1.73198e+09	1.75171e+09	1840164260	1.50288e+09	1.92369e+09	1.97371e+09	2.07463e+09	1.69545e+09	2.4188e+09	2.76671e+09	1.74786e+09	1.35314e+09	1.84727e+09	1.87349e+09	2.1085e+09	1.60351e+09	2.44054e+09	2.23033e+09	2071081064	2.29504e+09	2.2353e+09	2.19692e+09	2827310454	2.40567e+09	2.75233e+09	3.02167e+09	17025.7	15758	17962.8	17299.9	17488	16690.5	18861.6	19583.3	17312.7	18469.8	17988.4	19222.9	17866	16942	18176.2
Q9QXQ0	Alpha-actinin-4 OS=Rattus norvegicus GN=Actn4 PE=1 SV=2 - [ACTN4_RAT]	104.849	1.37937e+09	1.51934e+09	1.78867e+09	2.15573e+09	2.103e+09	1.95756e+09	1.96908e+09	2.0819e+09	1.82256e+09	1.62302e+09	1.87172e+09	1.99211e+09	2.04042e+09	1.81268e+09	2.39001e+09	2802051144	2.13173e+09	1.70081e+09	2.1779e+09	2.27681e+09	2.45908e+09	2.14674e+09	2844604057	2.72755e+09	1.94419e+09	2.16561e+09	2.16698e+09	2.21082e+09	2.60313e+09	2.46346e+09	2960137139	2.77802e+09	16962	16010.7	18606.3	18191.9	17672.4	15890.8	19777.3	18366	14061	13871.5	14699.1	15484.2	14592.6	15419.5	15859.3
P63259	Actin, cytoplasmic 2 OS=Rattus norvegicus GN=Actg1 PE=1 SV=1 - [ACTG_RAT]	41.7658	6.54296e+09	1.43486e+10	9.25614e+09	13813411980	7863217888	1.73571e+10	7.23672e+09	7.41606e+09	2.26273e+10	2.08174e+10	2.14854e+10	2.02285e+10	2.56717e+10	2.12483e+10	1.99628e+10	2.68499e+10	2.60737e+10	2.17127e+10	3.03852e+10	2.96361e+10	3.32146e+10	2.87108e+10	2.88415e+10	3.35517e+10	1.81566e+10	19813944554	1.66176e+10	1.92772e+10	1.71137e+10	1.75419e+10	2.44611e+10	2.49818e+10	16605.1	28871.7	23232.8	26843.8	18948.1	34945.1	20212.2	22777.1	46450.8	46389.9	46620.8	39763.5	49038.5	46348.3	42066.8
P85973	Purine nucleoside phosphorylase OS=Rattus norvegicus GN=Pnp PE=1 SV=1 - [PNPH_RAT]	32.281	2.47096e+09	1.98399e+09	3.1152e+09	2.83653e+09	2.77052e+09	2.63609e+09	2.78323e+09	2.79047e+09	2.05555e+09	1.73949e+09	1.92415e+09	2.15437e+09	2.11177e+09	2.03754e+09	2.53976e+09	2.79598e+09	2032655418	1.80707e+09	1.95357e+09	2.04792e+09	2.16548e+09	1.85111e+09	2.48223e+09	2.5048e+09	1.84951e+09	2.03015e+09	2.08714e+09	1.89463e+09	2.44132e+09	2.27134e+09	2.49389e+09	2.24195e+09	16486.9	15332.3	17597.8	16476.3	15530.4	14586.9	18075.1	18262.3	12746.8	12459.1	12863.9	14223.5	12721.5	12722.9	13928
P01048	T-kininogen 1 OS=Rattus norvegicus GN=Map1 PE=1 SV=2 - [KNT1_RAT]	47.7446	5.68001e+09	5.07446e+09	6.28345e+09	7.2406e+09	7038792679	6.51311e+09	6617423085	6.0699e+09	11902059080	1.07882e+10	1.13838e+10	1.2766e+10	1.28094e+10	1.26619e+10	1.37131e+10	1.40238e+10	1.65097e+10	1.48329e+10	1.36871e+10	14780211575	1.62443e+10	1.52478e+10	1.81668e+10	1.6401e+10	1.32663e+10	1.5273e+10	1.37339e+10	1.34544e+10	1.61586e+10	17042636632	1.7308e+10	1.53991e+10	16221.7	14152.3	17287.9	14961.9	14962.3	13824.2	18287.7	16450.6	20961.2	21187	21899.9	21679	20968.7	22554.9	23565.4
P14668	Annexin A5 OS=Rattus norvegicus GN=Anxa5 PE=1 SV=3 - [ANXA5_RAT]	35.7223	6.20376e+09	5864310252	7.35804e+09	7410897947	7262043431	6.20019e+09	7.17665e+09	8.47633e+09	7.16895e+09	6.64296e+09	7.84232e+09	8.55518e+09	7.66454e+09	7.14168e+09	9.51287e+09	9.92904e+09	8.32754e+09	7.57143e+09	8.73007e+09	8.30733e+09	9520794404	8.45895e+09	1.10328e+10	1.08864e+10	7.63903e+09	8.00348e+09	9.10558e+09	9.12065e+09	1.02945e+10	9.68881e+09	1.09433e+10	9.63537e+09	15187.5	13586.2	16107.8	14216.6	15240.8	13950.6	17368.3	17302.8	16555.7	15980.7	17798.2	15895.6	16165.9	16680.6	17802.4
P47942	Dihydropyrimidinase-related protein 2 OS=Rattus norvegicus GN=Dpysl2 PE=1 SV=1 - [DPYL2_RAT]	62.2386	2.41351e+09	2.76665e+09	2.86736e+09	3.19417e+09	2.78963e+09	3.53755e+09	3.48459e+09	3.10701e+09	2.9449e+09	2.87962e+09	2.97495e+09	3.22842e+09	3.54332e+09	3.06052e+09	4.06191e+09	1.09595e+10	3.39107e+09	2.76899e+09	3.64922e+09	3.41932e+09	4.29142e+09	3.27103e+09	4.44671e+09	4.37591e+09	3.08749e+09	3.32511e+09	3.03609e+09	3.21642e+09	8.50679e+09	3.80136e+09	7.32853e+09	3.8623e+09	14836.6	14117.6	15526.3	15051.1	15362.5	14275	16176	15283.8	13882.2	14152.1	14035.4	13675.2	13777	13170.8	13680.1
P82995	Heat shock protein HSP 90-alpha OS=Rattus norvegicus GN=Hsp90aa1 PE=1 SV=3 - [HS90A_RAT]	84.7618	2.30557e+09	2.96345e+09	2.89937e+09	3.34546e+09	2.60566e+09	3.47332e+09	3.03841e+09	2.46382e+09	3.47432e+09	3.598e+09	3.63161e+09	3.97957e+09	3.9049e+09	3771574444	4.41069e+09	5.01742e+09	3776218137	3.50821e+09	4056775307	4.49139e+09	4661147662	4.10363e+09	4.98173e+09	5.53884e+09	3.87509e+09	4.30677e+09	4.37091e+09	4.3537e+09	4.93862e+09	5.22214e+09	5.99862e+09	5.2621e+09	14523.2	12859.2	16526.5	15121.6	14977.4	14502.7	17952.5	17421	13972	14084.3	14676.5	15292.3	14267.4	15043.8	15955.4
P48037	Annexin A6 OS=Rattus norvegicus GN=Anxa6 PE=1 SV=2 - [ANXA6_RAT]	75.7065	2.39536e+09	2.0808e+09	2.79159e+09	3.02654e+09	2.90658e+09	2.54195e+09	2.83912e+09	3.01298e+09	1726585968	1.55971e+09	1.62376e+09	7.78334e+08	1.80568e+09	1.79542e+09	2.06258e+09	2416154287	1914525750	8.5158e+08	1798029182	2144015376	2.04503e+09	1.90123e+09	1.95026e+09	2.29529e+09	2.09275e+09	2377291439	2.3065e+09	2.44142e+09	2.79895e+09	2.62185e+09	2.89269e+09	2.57925e+09	14398.8	14313.2	15397.1	15778.8	15640.5	13608.8	16603.3	16401.9	9832.56	9275.12	10462	6542.3	10344.1	10270.8	10565.5
P06761	78 kDa glucose-regulated protein OS=Rattus norvegicus GN=Hspa5 PE=1 SV=1 - [GRP78_RAT]	72.3024	3.74229e+09	3.25912e+09	4.88581e+09	4.47781e+09	4.26172e+09	4.11392e+09	5.36367e+09	5.25377e+09	4.49895e+09	4.12686e+09	4.92014e+09	5.20459e+09	4.92621e+09	4.83218e+09	6.11435e+09	6.48322e+09	4.96758e+09	4705734401	5.7218e+09	5.20003e+09	5.72818e+09	5.19818e+09	6450152779	6.99794e+09	4.72357e+09	4.8227e+09	6.12801e+09	6.05366e+09	6.26787e+09	6.78188e+09	7.64419e+09	6.69155e+09	14186.5	12459.2	15532.4	14527.4	14076.7	12774.2	15785.7	15676.7	14034.7	14552.6	15306.5	15587.5	13352.8	14760.8	14442.5
P04764	Alpha-enolase OS=Rattus norvegicus GN=Eno1 PE=1 SV=4 - [ENOA_RAT]	47.0982	2670356902	2.44341e+09	2.73851e+09	3016238375	3.07394e+09	2.79223e+09	2.9285e+09	2899212359	3.01191e+09	2.70845e+09	2.95393e+09	3.32332e+09	3267930076	3.13776e+09	3.71504e+09	4.3706e+09	3.45204e+09	3.39918e+09	3.78437e+09	3.82778e+09	3.89916e+09	3.1716e+09	4.35521e+09	4.2228e+09	3.02775e+09	3.38911e+09	3.31482e+09	3.17969e+09	3.6993e+09	3.32771e+09	3911973219	3.79458e+09	14172.5	11722.1	14858.8	13256	14448.6	12131	15380.5	15222.9	14342.4	13887.2	15423.9	14201.1	14516.5	14624.5	15230.1
Q03626	Murinoglobulin-1 OS=Rattus norvegicus GN=Mug1 PE=2 SV=1 - [MUG1_RAT]	165.221	1.22837e+09	9.14724e+08	1.34488e+09	1.09423e+09	1.11077e+09	1.16818e+09	1.18369e+09	1.21945e+09	1.14107e+09	1.00222e+09	1.27978e+09	1.1724e+09	1.13672e+09	1.12943e+09	1.43948e+09	1.60746e+09	1.07894e+09	9.11445e+08	1.23579e+09	1.08583e+09	1.23184e+09	8.76467e+08	1.17674e+09	1.28095e+09	1.50467e+09	1.75584e+09	1.71388e+09	1.4559e+09	2.16397e+09	1.8336e+09	1.83952e+09	1.72867e+09	13960.6	11750.5	13326.6	13065.2	12418.1	10719	13110.7	13885	12482.6	12767.1	13346.8	13446	12710.6	12872.1	13672.8
P04785	Protein disulfide-isomerase OS=Rattus norvegicus GN=P4hb PE=1 SV=2 - [PDIA1_RAT]	56.9157	2.36166e+09	2.20481e+09	2.6443e+09	2.78196e+09	2.75326e+09	2.80895e+09	3.15735e+09	2.44778e+09	3.10939e+09	2.65465e+09	3.14929e+09	3.23605e+09	3.26062e+09	3.03324e+09	4.43336e+09	4.31206e+09	3.90687e+09	3.1813e+09	3.63659e+09	3.33207e+09	4.11919e+09	3.0112e+09	4.78119e+09	4.58063e+09	3.20969e+09	3.695e+09	3.58077e+09	3.42579e+09	5.0037e+09	4.48035e+09	5.00787e+09	4.31074e+09	13672.9	12587.6	15271.6	13379.8	12942.4	11491.4	14729.3	14806.2	12525.3	13172.2	13017	14289.7	13607.7	13866.5	15661
P01026	Complement C3 OS=Rattus norvegicus GN=C3 PE=1 SV=3 - [CO3_RAT]	186.342	4.55988e+08	7.19808e+08	7.12836e+08	8.76262e+08	684362540	8.69587e+08	6.65043e+08	5.71714e+08	1.16222e+09	9.70048e+08	1.16132e+09	1.21078e+09	1.22536e+09	1.25074e+09	1.36511e+09	1.63773e+09	1.0678e+09	7.62118e+08	1.31087e+09	1.40219e+09	1.26988e+09	1.15187e+09	1.50782e+09	1.45007e+09	1.34272e+09	1.64625e+09	1.45373e+09	1.47863e+09	1643376900	1.58541e+09	2.01489e+09	1.79396e+09	13542.7	17946.6	15765.3	17461.4	15354.8	16991.6	16393.5	15483.1	22264	21407.2	22586.7	22527.2	23674.2	23426.4	22679.6
P24090	Alpha-2-HS-glycoprotein OS=Rattus norvegicus GN=Ahsg PE=1 SV=2 - [FETUA_RAT]	37.9582	1.69172e+10	16909699838	1.78112e+10	1.59165e+10	1.8126e+10	1.7136e+10	19364968477	1.43601e+10	3.07117e+10	3.07068e+10	3.74179e+10	3.10689e+10	3.69765e+10	3.63445e+10	4.77665e+10	4.43409e+10	3.62446e+10	3.15747e+10	4.09477e+10	2.8633e+10	4.22215e+10	3.06062e+10	4.09187e+10	4.86809e+10	3.34067e+10	4.23122e+10	4.33036e+10	3.23018e+10	5.05897e+10	4.14949e+10	3.68666e+10	3.86255e+10	13103	11776.8	13405.2	12211.9	12811.3	11450.2	13425.1	12611.9	14827.5	14885.3	15289.6	14640.4	14119.5	14530.2	15351.5
P18418	Calreticulin OS=Rattus norvegicus GN=Calr PE=1 SV=1 - [CALR_RAT]	47.9658	5.18874e+09	4.34718e+09	6.09698e+09	5.58178e+09	5.69977e+09	4.41571e+09	6.39707e+09	5.7262e+09	6.25782e+09	5.5126e+09	6.60331e+09	6.59326e+09	5.91635e+09	5.39911e+09	7.75185e+09	7.611e+09	7.45212e+09	6849384151	7.36614e+09	6.90721e+09	6.7414e+09	5.99975e+09	7.94778e+09	7.26419e+09	6.40536e+09	6406453629	7.13369e+09	6.7566e+09	7.63781e+09	7.48717e+09	6.99403e+09	5.76931e+09	13059.8	11133.2	14143.4	12363	13030.6	10571	14178.3	14356.7	13336.2	13066.7	13925.7	13495.4	12833.8	13343.6	13866.2
P34058	Heat shock protein HSP 90-beta OS=Rattus norvegicus GN=Hsp90ab1 PE=1 SV=4 - [HS90B_RAT]	83.2291	2.3206e+09	3.25019e+09	2.89937e+09	3553452991	2.7788e+09	3.71823e+09	3.03841e+09	2.54197e+09	3.70379e+09	3756453573	3753254594	4.21464e+09	4.24718e+09	3907432691	4.41547e+09	5.06442e+09	4.04338e+09	3.69704e+09	4.13869e+09	4898059041	5.13512e+09	4.43511e+09	5.29549e+09	5.70348e+09	4153928546	4621174713	4412049668	4.39665e+09	5.18677e+09	5.22214e+09	5.99862e+09	5.31828e+09	12851.5	13366.9	14289.1	14420	13135.6	14965.7	14231.5	15220.2	14687.1	14631.8	15059.6	15910.6	14749.5	15477.4	14875.6
Q9Z1P2	Alpha-actinin-1 OS=Rattus norvegicus GN=Actn1 PE=1 SV=1 - [ACTN1_RAT]	102.896	1.30583e+09	1.51934e+09	1.74431e+09	2.15573e+09	2.06517e+09	1.94965e+09	1.88429e+09	1.98084e+09	1.78225e+09	1.59037e+09	1.83968e+09	1.89303e+09	1.98893e+09	1.76049e+09	2333489152	2.7959e+09	8.08177e+09	1.63508e+09	2.1393e+09	2.27681e+09	2.40284e+09	2.14674e+09	2.69359e+09	7166668462	1.94419e+09	2.10245e+09	2.14534e+09	2.21082e+09	2.60313e+09	2.43616e+09	2960137139	2.77802e+09	12726.3	14637.9	14985.7	16116	16344.6	14504.3	16200.7	16665.6	14214.6	14688	14987.4	15955.3	14801	16273.2	16079.9
P62260	14-3-3 protein epsilon OS=Rattus norvegicus GN=Ywhae PE=1 SV=1 - [1433E_RAT]	29.1554	8.68736e+09	7712273205	9.43448e+09	1.07083e+10	9.44324e+09	9.19307e+09	9.70794e+09	1.0488e+10	8.45333e+09	7.30765e+09	8.2583e+09	9.24901e+09	8.25693e+09	7.97911e+09	9678325266	1.05614e+10	9.15505e+09	7.63162e+09	8.82329e+09	8945352047	9.18124e+09	8.59576e+09	11069225301	10411922211	7867293951	7664018136	8.24499e+09	8125510684	9.41234e+09	8.80421e+09	9.63413e+09	9.2359e+09	12329.9	12344.7	13224.1	13230	13616	13577.1	14393.4	14932.1	12544.8	12710.1	13111.7	12900.5	13056.3	14013.8	12991.3
P06238	Alpha-2-macroglobulin OS=Rattus norvegicus GN=A2m PE=2 SV=2 - [A2MG_RAT]	163.682	6.14193e+08	6.92863e+08	7.18424e+08	9.15474e+08	7.67685e+08	1.01851e+09	8.98856e+08	7.89877e+08	9.01713e+08	792848043	9.7929e+08	1.03438e+09	9.19538e+08	8.35056e+08	1.30695e+09	1.48517e+09	9.80455e+08	7.71062e+08	1.12681e+09	9.23932e+08	1.11026e+09	7.7612e+08	1.40472e+09	1244477481	1.01182e+09	1.32189e+09	1.0869e+09	1.10694e+09	1.74999e+09	1.45519e+09	1.8152e+09	1.44598e+09	11806.1	9479.67	11753.3	10267.5	10914	8459.89	11988.3	11891.2	9965.26	10251.4	9460.04	9527.99	10216.3	9837.31	10599.7
Q08163	Adenylyl cyclase-associated protein 1 OS=Rattus norvegicus GN=Cap1 PE=1 SV=3 - [CAP1_RAT]	51.5565	1.21099e+09	1223883915	1.44387e+09	1.52016e+09	1.18973e+09	1.5762e+09	1.45265e+09	1220962080	1.27324e+09	1.14386e+09	1.32267e+09	1.43713e+09	1.35019e+09	1.29223e+09	1771968820	1.82376e+09	1.57628e+09	1.29055e+09	1.5785e+09	1.53148e+09	1.79035e+09	1.40254e+09	1.99526e+09	1.87539e+09	1.40189e+09	1.67656e+09	1.62583e+09	1.4018e+09	2.13036e+09	1.97047e+09	2.09266e+09	1.72221e+09	11739.1	10495.8	12412.3	11632.6	9867.73	11140.3	13110.4	11982.4	9773.77	10542.3	10234.1	10320	10955.9	10965.2	11860
D3ZHV2	Microtubule-actin cross-linking factor 1 OS=Rattus norvegicus GN=Macf1 PE=1 SV=1 - [MACF1_RAT]	619.216	1.46371e+08	1.65644e+08	1.6564e+08	1.99732e+08	2.04334e+08	2.13778e+08	1.85292e+08	1.73227e+08	2.90416e+08	4.62661e+08	2.79554e+08	3.21354e+08	2.86786e+08	1.56878e+08	2.00372e+08	1.81965e+08	3.27573e+08	2.71516e+08	3.59104e+08	3.26948e+08	4.06731e+08	1.51661e+08	1.63031e+08	2.42474e+08	2.48765e+08	2.58276e+08	2.27355e+08	6.4141e+08	1.69335e+08	2.08396e+08	2.26387e+08	2.12812e+08	11546.3	11767.5	13930.8	13718.2	11961.8	13462.9	13864.3	13552.4	6953.82	7641.44	7298.23	7594.06	7606.99	7557.43	8816.2
Q5QD51	A-kinase anchor protein 12 OS=Rattus norvegicus GN=Akap12 PE=1 SV=1 - [AKA12_RAT]	181.001	5.87581e+08	3.25031e+08	2.68469e+08	3.35624e+08	3.58501e+08	4.79317e+08	2.83588e+08	2.9979e+08	5.85136e+08	2.9767e+08	2.72323e+08	499197474	3.22224e+08	3.08753e+08	2.68373e+08	3.09141e+08	3.47241e+08	3.34635e+08	2.78869e+08	4.16671e+08	3.47913e+08	4.3526e+08	3.06103e+08	3.24735e+08	2.67004e+08	2.78736e+08	2.22996e+08	2.26422e+08	3.31873e+08	2.80329e+08	3.67236e+08	2.26036e+08	11527	9516.04	10401.4	9527.94	10667	10785.9	9994.71	10653.5	8655.91	8225.2	7042.21	7011.75	7515.71	7744.44	6729.04
Q62812	Myosin-9 OS=Rattus norvegicus GN=Myh9 PE=1 SV=3 - [MYH9_RAT]	226.197	6.20543e+08	6.39008e+08	5.90867e+08	7.41186e+08	6.82108e+08	8.67514e+08	4.78466e+08	5.64397e+08	1.15835e+09	9.7466e+08	1.89845e+09	1.2268e+09	1.18033e+09	1.02388e+09	1.97583e+09	2.09272e+09	1.38216e+09	1.0146e+09	1.24836e+09	1.45745e+09	1.36465e+09	1.161e+09	1.53552e+09	1.27729e+09	1.62872e+09	1.07956e+09	8.42827e+08	1.06031e+09	1.02313e+09	9.76189e+08	1.14678e+09	1.11465e+09	11319.9	12298.5	10566.3	11288.9	10643.1	10418.5	9922	10655.2	14555.8	15655.2	14532.3	14614.2	14975.7	13121.9	13204.5
P10719	ATP synthase subunit beta, mitochondrial OS=Rattus norvegicus GN=Atp5b PE=1 SV=2 - [ATPB_RAT]	56.3185	810131842	1084624191	1.06242e+09	1.30318e+09	9.84346e+08	1.54561e+09	9.8348e+08	9.28224e+08	1.91807e+09	1.62669e+09	1.9394e+09	1.90638e+09	2.25274e+09	2.0358e+09	2.21041e+09	2621597450	2.25212e+09	1.60139e+09	2.57143e+09	2.70982e+09	2.81387e+09	2.50836e+09	2.92757e+09	3194068574	1.82247e+09	2.00796e+09	1.81994e+09	1.90253e+09	2.08417e+09	2.06002e+09	2.67407e+09	2.58699e+09	11113.2	11981.4	13464.4	13078.6	11161.7	14808	12477	11670.3	16703	16482.7	17004.2	15468.9	18250.4	17759.2	16812.7
Q8VIF7	Selenium-binding protein 1 OS=Rattus norvegicus GN=Selenbp1 PE=1 SV=1 - [SBP1_RAT]	52.4985	1.41451e+09	1.10127e+09	1.76646e+09	1.46542e+09	1.72942e+09	1.2778e+09	1.74973e+09	1.58173e+09	1.52994e+09	1.52514e+09	1.48311e+09	1.75702e+09	1.49316e+09	1.65389e+09	1.79273e+09	2.04392e+09	1.77898e+09	1891288857	1.80501e+09	1.82383e+09	1.97362e+09	1.66237e+09	1952463682	2118478946	1.5207e+09	1.70066e+09	1658142057	1.61017e+09	1.80881e+09	1.7897e+09	1.95095e+09	1.75113e+09	10897.2	9001.72	9851.88	9754.66	9788.74	9016.65	10919.8	10695.6	9341.68	9668.17	9833.69	9474.01	9318.41	10516.2	10204.2
P63102	14-3-3 protein zeta/delta OS=Rattus norvegicus GN=Ywhaz PE=1 SV=1 - [1433Z_RAT]	27.7537	8.71473e+09	8.04773e+09	9.83542e+09	1.07497e+10	9624528688	9.04414e+09	9.99775e+09	1.11218e+10	8.47351e+09	7.66555e+09	8555597018	9.22688e+09	8.31955e+09	8.07934e+09	9.73339e+09	1.01818e+10	9.17692e+09	8.11678e+09	9.31922e+09	9.01096e+09	9.24715e+09	8.96693e+09	1.09755e+10	10140717636	8.05246e+09	7.77153e+09	8.78038e+09	8285499036	9.3731e+09	9.31287e+09	9.65144e+09	9357568041	10893.9	10652.7	10822.1	10803.8	11889.8	11373.9	11997.3	12075.3	10853.5	11058.2	11981.6	10511.7	12089.3	11380.6	11819.4
P14046	Alpha-1-inhibitor 3 OS=Rattus norvegicus GN=A1i3 PE=1 SV=1 - [A1I3_RAT]	163.67	1.22837e+09	9.14724e+08	1.34488e+09	1.09423e+09	1.11077e+09	1.16818e+09	1.18369e+09	1.21945e+09	1.14107e+09	1.00222e+09	1.27978e+09	1.1724e+09	1.13672e+09	1.12943e+09	1.43948e+09	1.60746e+09	1.07894e+09	9.11445e+08	1.10419e+09	1.08583e+09	1.23184e+09	8.76467e+08	1.17674e+09	1.28095e+09	1.50467e+09	1.75584e+09	1.71388e+09	1.4559e+09	2.16397e+09	1.8336e+09	1.83952e+09	1.72867e+09	10577.8	7798.77	9531.43	9455.38	8678.71	6934.58	9507.97	9656.34	9285.34	9205.25	9521.41	9085.63	8140.85	8548.57	9664.39
P63039	60 kDa heat shock protein, mitochondrial OS=Rattus norvegicus GN=Hspd1 PE=1 SV=1 - [CH60_RAT]	60.9174	4.46187e+08	5.77548e+08	5.46721e+08	5.4966e+08	6.01412e+08	7.00874e+08	4.911e+08	5.2438e+08	1.32763e+09	1.12654e+09	1.18529e+09	1.27493e+09	1.3711e+09	1.3276e+09	1.4019e+09	1.72755e+09	1.61119e+09	1269835025	1.55763e+09	1.64254e+09	1.91836e+09	1.57106e+09	1.73438e+09	1.90077e+09	1.35644e+09	1.49382e+09	1.36514e+09	1.38447e+09	1.66427e+09	1.62378e+09	1.90959e+09	1.80493e+09	10531.3	11625.3	10945.8	11104.2	9714.89	11458.2	11328.2	11296.9	17284.4	17138.1	14754.1	16387.3	18235.7	18021.5	17481.3
Q66HD0	Endoplasmin OS=Rattus norvegicus GN=Hsp90b1 PE=1 SV=2 - [ENPL_RAT]	92.7134	1.41767e+09	2092132910	1.93162e+09	2.26897e+09	1.89509e+09	2.36244e+09	1.86409e+09	1.66759e+09	2345064106	2.23291e+09	2454153212	2.5775e+09	2.67046e+09	2.34378e+09	2.82651e+09	3.02603e+09	2531296076	2.24516e+09	2.68957e+09	2.94158e+09	3.35465e+09	2.93756e+09	3.39273e+09	3.42551e+09	2.70746e+09	2.72502e+09	2.84241e+09	2.81321e+09	3.04701e+09	3.15603e+09	3.60081e+09	3.32111e+09	10298.3	9702.39	10566.6	10733.6	11056.9	9464.02	11352	10759.2	11017.5	10735.2	10008.2	10446	10253.6	9874.38	10555.9
P16617	Phosphoglycerate kinase 1 OS=Rattus norvegicus GN=Pgk1 PE=1 SV=2 - [PGK1_RAT]	44.51	2.03543e+09	1.68384e+09	2.35214e+09	2.50448e+09	2.35344e+09	2.22984e+09	2.32231e+09	2.2452e+09	2.22085e+09	1.91163e+09	2388671455	2.61261e+09	2.46453e+09	2478410424	3.09244e+09	3.25865e+09	2.891e+09	2.53073e+09	2.51332e+09	2888005900	2.93506e+09	2.58773e+09	3.41269e+09	3.29972e+09	2.40674e+09	2.7481e+09	2.78161e+09	2.72692e+09	3.43739e+09	3055518331	3.34947e+09	3.15009e+09	10242.4	8096.94	10590.7	9199.06	11052.9	8379.12	12203.8	10836.7	8042.27	8237.62	8791.34	8974.08	8011.75	8050.78	8738.18
Q5XFX0	Transgelin-2 OS=Rattus norvegicus GN=Tagln2 PE=2 SV=1 - [TAGL2_RAT]	22.3791	6.11621e+09	4.3255e+09	5.06845e+09	5.76772e+09	6.10191e+09	3.44662e+09	3.00462e+09	6517062234	6.61964e+09	5.64808e+09	5.58222e+09	7.48575e+09	5.60469e+09	4.55965e+09	7.45914e+09	8.81965e+09	8.18975e+09	5.65036e+09	5.79543e+09	8.08333e+09	5.71376e+09	5.51781e+09	9.48612e+09	6.60145e+09	6496605864	7.13139e+09	7.76786e+09	6.32059e+09	5800941175	7434062741	6.16104e+09	6.62232e+09	10225.8	7374.21	9141.5	7799.81	9314.18	6069.82	7327.81	9996.36	7976.76	8026.55	7913.32	8324.78	7162.81	6550.08	7695.13
P17475	Alpha-1-antiproteinase OS=Rattus norvegicus GN=Serpina1 PE=1 SV=2 - [A1AT_RAT]	46.1065	3.0804e+09	3.17424e+09	3.80736e+09	4.01457e+09	3.59148e+09	3.82658e+09	3.69676e+09	3.04473e+09	6.70084e+09	6.75889e+09	7.11543e+09	7.71729e+09	8.06025e+09	6.94427e+09	9.30148e+09	1.06445e+10	7.66186e+09	7.46121e+09	7.50658e+09	8120897389	8.80062e+09	7.31173e+09	1.04557e+10	1.03653e+10	7.04769e+09	8.92377e+09	8.42735e+09	8.51707e+09	1.02567e+10	9.58064e+09	1.04037e+10	1.04257e+10	10148.6	8688.26	10727.1	9082.6	8855.79	8159.66	9426.87	9499.93	11643.9	13022.3	11916.2	13099.3	12438.9	12586.2	12953.3
P08932	T-kininogen 2 OS=Rattus norvegicus PE=1 SV=2 - [KNT2_RAT]	47.6734	5.68001e+09	5.07446e+09	6.28345e+09	7.2406e+09	7038792679	6.51311e+09	6617423085	6.0699e+09	11902059080	1.07882e+10	1.13838e+10	1.2766e+10	1.28094e+10	1.26619e+10	1.37131e+10	1.40238e+10	1.65097e+10	1.48329e+10	1.36871e+10	14780211575	1.62443e+10	1.52478e+10	1.81668e+10	1.6401e+10	1.32663e+10	1.5273e+10	1.37339e+10	1.34544e+10	1.61586e+10	17042636632	1.7308e+10	1.53991e+10	10033	8100.74	9929.53	9372.63	8889.94	8685.23	10332.9	9827.92	11477.5	12352.4	12631.1	12884.2	11893.6	12949.4	13352.7
P50399	Rab GDP dissociation inhibitor beta OS=Rattus norvegicus GN=Gdi2 PE=1 SV=2 - [GDIB_RAT]	50.5047	1.43032e+09	1492602716	1.68444e+09	2.10448e+09	1.8421e+09	2.00523e+09	1.9359e+09	1.82521e+09	1.67897e+09	1.30358e+09	1.76575e+09	1.77455e+09	1836343159	1.65156e+09	2.2185e+09	2.57433e+09	2.01909e+09	1.40464e+09	2.09556e+09	2.03477e+09	2272969719	1.85158e+09	2.67816e+09	2.46171e+09	1.82605e+09	2.06036e+09	1.91919e+09	1.91059e+09	2.46915e+09	2.20433e+09	2.81062e+09	2.49321e+09	9822	8868.77	10364.2	10049.8	9889.52	9444	9976.99	9830.37	9423.98	8779.14	9433.45	9445.3	9571.96	8962.59	9017.85
P04642	L-lactate dehydrogenase A chain OS=Rattus norvegicus GN=Ldha PE=1 SV=1 - [LDHA_RAT]	36.4273	1.86327e+09	1.93946e+09	2.10878e+09	2.62752e+09	1.51379e+09	2.52029e+09	2.63633e+09	2.45202e+09	2.83868e+09	2.25782e+09	2.8888e+09	2.97761e+09	3.22103e+09	2.84751e+09	3833586197	4.19814e+09	2.95778e+09	2233866367	3.52165e+09	3.39847e+09	3.55304e+09	3.22302e+09	4.07085e+09	4.4219e+09	3.05727e+09	3.28293e+09	3.41572e+09	3.08982e+09	3.61929e+09	3.76871e+09	4.34649e+09	3.96737e+09	9685.14	9710.23	11238.4	10805.2	7817.35	8679.96	10648.9	11455.4	12517.3	11686.9	11457.2	11259.3	11746.3	11009	11142.3
P10111	Peptidyl-prolyl cis-trans isomerase A OS=Rattus norvegicus GN=Ppia PE=1 SV=2 - [PPIA_RAT]	17.8628	1.53561e+10	1.17366e+10	1.8005e+10	1.50753e+10	1.82859e+10	12630079261	1.85316e+10	1.5454e+10	13747356527	1.37852e+10	1.41176e+10	13775902054	14337765415	1.30434e+10	1.64958e+10	1.85161e+10	1.63757e+10	1.54387e+10	1.70332e+10	1.59957e+10	1.73368e+10	1.55364e+10	1.85206e+10	1.78681e+10	1.36748e+10	1.53906e+10	1.61253e+10	1.51768e+10	1.72451e+10	1.63092e+10	1.66692e+10	15643975806	9540.05	8361.26	10333.5	9259	8521.96	7557.28	9480.79	8725.19	9115.06	9112.64	10351.1	8562.08	8309.56	7745.38	9060.83
P35213	14-3-3 protein beta/alpha OS=Rattus norvegicus GN=Ywhab PE=1 SV=3 - [1433B_RAT]	28.0368	7.39525e+09	6506442017	8.34157e+09	9.26097e+09	8.10436e+09	7.66046e+09	9.17553e+09	9.61344e+09	6.87524e+09	6.00097e+09	6.94883e+09	7.55026e+09	6.69766e+09	6588450419	7.94003e+09	8.36759e+09	7.23883e+09	6.11151e+09	7.18291e+09	7.21172e+09	7.25976e+09	6.8292e+09	8.90615e+09	8.21994e+09	6.31516e+09	6.06982e+09	6.7249e+09	6.67878e+09	7.33097e+09	7.51871e+09	7.92661e+09	7.60827e+09	9498.05	9016.46	9905.87	9727.6	10592.8	9163.58	11174.3	11750.6	8729.86	9062.02	9461.21	8503.58	9954.82	9695.27	9213.63
Q9ER34	Aconitate hydratase, mitochondrial OS=Rattus norvegicus GN=Aco2 PE=1 SV=2 - [ACON_RAT]	85.38	1.10368e+09	1.05446e+09	7.23792e+08	691657287	1.51171e+09	6.81826e+08	6.96979e+08	7.57074e+08	1.2218e+09	6.98656e+08	1.37645e+09	8.25559e+08	1.63168e+09	1.27216e+09	1.92546e+09	1.06326e+09	1.46346e+09	1.27207e+09	1.52135e+09	1.5695e+09	1.75111e+09	8.92147e+08	1.3595e+09	1.48718e+09	1.28273e+09	1.52525e+09	1.47429e+09	1.56327e+09	1111510775	1.78852e+09	1212163891	1.05339e+09	9342.85	8410.47	10091.4	9428.18	9555.61	8019.1	10593.3	10726	8026.43	7862.7	7676.28	8865.05	7869.88	7560.71	8576.82
P68255	14-3-3 protein theta OS=Rattus norvegicus GN=Ywhaq PE=1 SV=1 - [1433T_RAT]	27.7608	8.08871e+09	6.93977e+09	8.51212e+09	9.74291e+09	8.78939e+09	8.18616e+09	9.17553e+09	1.02607e+10	7.57268e+09	6561293361	7.55231e+09	8.15337e+09	7.39617e+09	7.0307e+09	8.4042e+09	9.10273e+09	8.13896e+09	6.70252e+09	8.09483e+09	8.01997e+09	8.1898e+09	7.42803e+09	9.68544e+09	8.96899e+09	7.10545e+09	6.96181e+09	7.60825e+09	7.27283e+09	8369057672	7.8873e+09	8.57024e+09	8.35421e+09	9142.89	8231.39	9878.79	9558.89	9716.82	8587.35	10660.9	11570.1	9198.48	9007.21	9103.67	9025.52	9290.83	8836.69	9380.79
P07150	Annexin A1 OS=Rattus norvegicus GN=Anxa1 PE=1 SV=2 - [ANXA1_RAT]	38.8049	1.55112e+09	2.13563e+09	1.76897e+09	2573065925	2.43378e+09	2.60195e+09	2.34274e+09	2.4614e+09	2.09165e+09	1898849371	2.00678e+09	1.41951e+09	2399093514	2.25518e+09	2.55166e+09	3.24218e+09	2.78818e+09	1.30336e+09	3.1782e+09	3.14162e+09	3.45405e+09	3.125e+09	3.42446e+09	3.83221e+09	2.50689e+09	2.73031e+09	2.83963e+09	2.8103e+09	3.07601e+09	2.91196e+09	3448891766	3.54969e+09	9087.64	8718.65	9225.48	9303.29	9476.81	8452.02	10310.3	10136.7	8036.89	8099.16	7404.3	6868.34	8637.44	8466.52	8407.48
P05197	Elongation factor 2 OS=Rattus norvegicus GN=Eef2 PE=1 SV=4 - [EF2_RAT]	95.2229	5.43899e+08	8.08903e+08	7.35022e+08	9.75669e+08	8.87648e+08	1.16447e+09	7.50312e+08	7.72908e+08	9.47565e+08	8.74428e+08	1.13824e+09	1.03023e+09	1.02487e+09	8.90325e+08	1.14867e+09	1.51154e+09	1.21528e+09	8.04867e+08	1.67157e+09	1.38762e+09	1.52291e+09	1.22019e+09	1.61448e+09	1.65466e+09	1.45243e+09	1.66691e+09	1.30407e+09	1.43916e+09	1.74421e+09	1.45379e+09	2.06646e+09	1.82701e+09	9042.32	10307.5	11221.6	11501.4	10714.4	9824.79	10630.4	10387.2	11499.7	12078.6	12426	11514.8	10465.6	10457	9901.01
O08730	Glycogenin-1 OS=Rattus norvegicus GN=Gyg1 PE=2 SV=4 - [GLYG_RAT]	37.3545	2.14891e+09	1692629145	2.37629e+09	2.46258e+09	2.30728e+09	1.93836e+09	2.50477e+09	2.92826e+09	1.94712e+09	1.78086e+09	2.07434e+09	2.27373e+09	1.81151e+09	1.59492e+09	2.43032e+09	2.64475e+09	2.14716e+09	2.00782e+09	2.29429e+09	1.94281e+09	2.38934e+09	2.07562e+09	2.58376e+09	2.99218e+09	2.08077e+09	2185451970	2.31253e+09	2.46828e+09	2.67994e+09	2.67394e+09	3.03126e+09	2.291e+09	8978.4	8839.78	9004.75	8534.5	8297.48	8995.13	9873.45	10191.6	8735.46	9028.98	8601	8694.64	9105.74	8789.95	8785.31
Q68FP1	Gelsolin OS=Rattus norvegicus GN=Gsn PE=1 SV=1 - [GELS_RAT]	86.0141	1.58878e+09	1.31842e+09	1.58009e+09	1.61075e+09	1.83094e+09	1.49735e+09	1.70432e+09	1.48343e+09	1.86945e+09	1.86495e+09	2.03155e+09	2.04209e+09	2.09228e+09	1.82678e+09	2.3658e+09	2.66374e+09	2.23729e+09	2.001e+09	2.38729e+09	2316893467	2.69335e+09	2270871453	2.81201e+09	2825619525	1.96683e+09	2032380311	2.2098e+09	2.18569e+09	2412262374	2.47828e+09	2.70001e+09	2.70081e+09	8868.42	8138.43	9367.45	9459.55	8128.91	8495.22	9141.08	9653.18	8372.59	10010.3	10307.7	9703.67	9306.48	9669.68	9651.4
O88600	Heat shock 70 kDa protein 4 OS=Rattus norvegicus GN=Hspa4 PE=1 SV=1 - [HSP74_RAT]	93.9971	4.17162e+08	3.60694e+08	4.7566e+08	4.37807e+08	4.05111e+08	4.0248e+08	5.06139e+08	4.5873e+08	3.64353e+08	3.60382e+08	5.87721e+08	4.33181e+08	4.48311e+08	3.83832e+08	5.60867e+08	5.77738e+08	4.15537e+08	4.49149e+08	4.60395e+08	4.45618e+08	6.89838e+08	540240189	5.81888e+08	5.952e+08	4.22335e+08	5.49329e+08	5.13832e+08	5.37288e+08	5.53765e+08	5.55383e+08	6.33876e+08	5.81876e+08	8574.56	6806.63	9939.62	8316.92	8798.68	7423.56	10229.3	10140.3	7326.44	7569.7	7832.22	7609.05	7745.24	8276.11	8866.33
P35704	Peroxiredoxin-2 OS=Rattus norvegicus GN=Prdx2 PE=1 SV=3 - [PRDX2_RAT]	21.7701	5.6413e+09	5.3995e+09	6.97863e+09	6922458683	6.97129e+09	5.51532e+09	6.97781e+09	6.32857e+09	4688445944	4.29385e+09	4851225211	5.16468e+09	5087952488	4.46803e+09	6.128e+09	6.72544e+09	4.73338e+09	4.03026e+09	4.43686e+09	4.73381e+09	5409607050	4951362354	6.43649e+09	6.22069e+09	4.16076e+09	4539778364	4.80035e+09	5.29652e+09	5.86937e+09	5.70186e+09	6.08305e+09	6.20838e+09	8571.86	7487.37	10015.8	7923.26	8886.58	7509.47	9873.36	8086.09	6761.64	6262.44	7064.15	5781.12	6041.5	6299.62	6661.75
P27139	Carbonic anhydrase 2 OS=Rattus norvegicus GN=Ca2 PE=1 SV=2 - [CAH2_RAT]	29.0956	6.35739e+09	4.16276e+09	6.24982e+09	5.76502e+09	7.28492e+09	4.83165e+09	7.45984e+09	6.96651e+09	3.99088e+09	3505991445	4.34039e+09	4.08348e+09	4182656377	4.21453e+09	5.39625e+09	5.46986e+09	4.26088e+09	3.864e+09	4.02232e+09	3.96927e+09	4.21585e+09	3.69229e+09	4.94456e+09	5.00656e+09	3.95742e+09	4.32565e+09	4.268e+09	4.23897e+09	5052885803	4.71661e+09	5.09907e+09	4.92207e+09	8562.55	7839.87	9164.68	9360.45	9487.43	7954.01	9510.25	9799.31	7734.34	7316.87	8476.09	8777.44	7775.82	7314.1	8147.31
P14942	Glutathione S-transferase alpha-4 OS=Rattus norvegicus GN=Gsta4 PE=1 SV=2 - [GSTA4_RAT]	25.4934	1.22364e+09	1.11929e+09	1.52356e+09	1.49359e+09	1.40485e+09	1288587669	1.87821e+09	1.75503e+09	1.27474e+09	1.14531e+09	1.71369e+09	1.64813e+09	1.43506e+09	1.49782e+09	2065581357	1.85275e+09	1.45871e+09	1.28626e+09	1.68378e+09	1.55483e+09	1.61699e+09	1.63314e+09	2.09516e+09	2.1081e+09	1.31293e+09	1357381191	1.87305e+09	1.80964e+09	1.77671e+09	2.04905e+09	2.03315e+09	2.07473e+09	8559.2	7019.16	8947.92	8091.37	7733.67	6703.95	8429.72	8875.05	7373.43	7596.8	7333.23	7520.59	7239.59	7202.2	7820.91
P62630	Elongation factor 1-alpha 1 OS=Rattus norvegicus GN=Eef1a1 PE=1 SV=1 - [EF1A1_RAT]	50.0821	2.51014e+09	5608460068	3.64836e+09	5.57112e+09	3249397024	6.74648e+09	3.11415e+09	3.23795e+09	9310963637	7.71345e+09	9.28597e+09	8.36658e+09	1.05461e+10	9.42481e+09	8.85815e+09	1.07925e+10	1.12107e+10	7.71163e+09	12459626189	1.18777e+10	1.41859e+10	1.37575e+10	1.31369e+10	1.37547e+10	10025512741	1.14482e+10	9116006990	9293514470	9.98827e+09	1.01939e+10	1.2571e+10	1.20559e+10	8524.04	11253.5	10199.4	10568.9	8596.14	12423.7	9366.4	8976.02	17169.4	16212.7	15577.6	14363.7	17049.8	17141.7	13286.8
P55260	Annexin A4 OS=Rattus norvegicus GN=Anxa4 PE=1 SV=3 - [ANXA4_RAT]	35.826	1.16099e+09	9.19556e+08	1.08511e+09	1.18664e+09	1320423644	1.0558e+09	1.29895e+09	1.40995e+09	1.15821e+09	1.02418e+09	9.49692e+08	5.70362e+08	1.24513e+09	1.04025e+09	1.44289e+09	1.49687e+09	1.33747e+09	5.07026e+08	1.28649e+09	1.34845e+09	1.44129e+09	1.29858e+09	1.21398e+09	1.60801e+09	1.31669e+09	1.35196e+09	1.47605e+09	1.40827e+09	1.76839e+09	1.55179e+09	1.69426e+09	1600120059	8508.8	6580.79	8600.35	7211.71	8778.97	6084.92	9062.83	8516.56	7139.63	6766.4	6236.03	5343.33	7066.58	7372.25	7177.14
O35763	Moesin OS=Rattus norvegicus GN=Msn PE=1 SV=3 - [MOES_RAT]	67.6968	1.09527e+09	2.27026e+09	1.40583e+09	2.10481e+09	1733142109	3.45013e+09	1.62727e+09	1.56714e+09	2.31068e+09	1.8252e+09	2.26701e+09	2344868888	2.81321e+09	2.45948e+09	2.4461e+09	3.0622e+09	2.9104e+09	2.35046e+09	3.62339e+09	3.31553e+09	3.49611e+09	3.07121e+09	3.58426e+09	3.84069e+09	3.066e+09	3.26554e+09	2.75387e+09	3.16164e+09	2.89761e+09	3.02094e+09	4.05555e+09	4.28867e+09	8488.28	11848.1	9422.99	10517.6	10136.9	12570.4	9980.53	10431.2	10401	10112.4	11294	11110.3	12085.1	10441.3	10769.2
P05065	Fructose-bisphosphate aldolase A OS=Rattus norvegicus GN=Aldoa PE=1 SV=2 - [ALDOA_RAT]	39.3273	2.05012e+09	1.71352e+09	2.27535e+09	2.20526e+09	2.36039e+09	1.75671e+09	2.52327e+09	2.5387e+09	2.32334e+09	2.29954e+09	2463642407	2.60756e+09	2.53012e+09	2.38932e+09	3.02056e+09	3.21483e+09	2.65448e+09	2.54687e+09	2.5437e+09	2.62076e+09	2.8292e+09	2.47347e+09	3.16321e+09	3.09951e+09	2398767072	2.60243e+09	2.72092e+09	2.63963e+09	3.26285e+09	3.01636e+09	3.13472e+09	2.9567e+09	8358.41	6184.96	8148.99	6834.62	7926.31	5802.79	8374.86	8278.38	6782.41	6671.27	7549.63	6910.22	6301.17	6217.46	6918.45
P14669	Annexin A3 OS=Rattus norvegicus GN=Anxa3 PE=1 SV=4 - [ANXA3_RAT]	36.3406	7.10084e+08	707302608	8.2586e+08	8.29803e+08	9.12852e+08	7.61097e+08	9.4187e+08	9.687e+08	5.63994e+08	5.52347e+08	5.83289e+08	6.0861e+08	6.11496e+08	5.60922e+08	7.10789e+08	8.17987e+08	6.5528e+08	631518140	6.51046e+08	6.70697e+08	7.37152e+08	6.61159e+08	7.62565e+08	8.21147e+08	5.93683e+08	6.56635e+08	711141793	6.91531e+08	8.01071e+08	755608853	8.48434e+08	7.17473e+08	8200.28	6726.22	8287.86	7207.77	7626.91	6398.43	8016.72	7818.36	5115.74	5289.63	4599.64	5289.81	4937.78	5186.9	5287
Q6IE52	Murinoglobulin-2 OS=Rattus norvegicus GN=Mug2 PE=1 SV=1 - [MUG2_RAT]	161.487	7.16676e+08	7.96542e+08	9.25073e+08	8.96529e+08	9.35729e+08	7.94914e+08	9.1153e+08	9.37988e+08	1.01851e+09	8.49721e+08	1.00733e+09	1176440730	1.11108e+09	1.07126e+09	1.30851e+09	1.30165e+09	7.9733e+08	7.95578e+08	1022576180	1.11895e+09	1107517252	9.13534e+08	9.85926e+08	1030637109	1166571175	1.38003e+09	1.36815e+09	1263499557	1495533475	1404625237	1.68404e+09	1.40975e+09	8130.31	6027.88	7452.58	6647.74	6633.83	4900.92	6965.21	6971.38	7070.56	6473.96	7064.33	6511.27	6257.56	6846.18	7326.42
P50137	Transketolase OS=Rattus norvegicus GN=Tkt PE=1 SV=1 - [TKT_RAT]	67.6006	7.39446e+08	9.86006e+08	1054572989	1.06375e+09	6.90072e+08	1.22696e+09	1.13574e+09	9.07052e+08	1.36291e+09	1.21012e+09	1.43152e+09	1.46587e+09	1.61017e+09	1.35601e+09	1.56375e+09	1.88456e+09	1.85352e+09	1.29789e+09	2.33159e+09	2.11377e+09	2.42137e+09	1.89665e+09	2.45504e+09	2.46582e+09	1.67713e+09	1.91466e+09	1.62581e+09	1.87352e+09	1.90766e+09	1.78173e+09	2.51311e+09	2.21741e+09	8081.87	8293.38	8626.26	8413.64	6233.62	7837.09	8647.3	7603.5	8834.99	8217.38	8690.07	8673.42	9056.37	8810.29	8650.62
P61980	Heterogeneous nuclear ribonucleoprotein K OS=Rattus norvegicus GN=Hnrnpk PE=1 SV=1 - [HNRPK_RAT]	50.9444	2.81048e+09	2.13888e+09	1.98943e+09	2.58318e+09	2.06807e+09	3.01691e+09	2.48943e+09	1.73467e+09	2.76281e+09	2.1306e+09	2.49176e+09	2.44111e+09	2.91139e+09	2.5222e+09	2.59654e+09	2.94714e+09	3.10588e+09	2.15033e+09	3.60991e+09	3.44445e+09	3.7125e+09	2.97437e+09	3.35679e+09	3.55945e+09	2.8077e+09	2.98581e+09	2.50237e+09	2.32955e+09	2.55269e+09	2.72125e+09	3.31396e+09	3.03128e+09	7953.19	10110.7	9360.21	9897.28	8657.12	10269.2	8449.74	8630.8	9735.4	9742.4	9631.81	9302.88	9139.5	9299.43	8982.57
Q5XI73	Rho GDP-dissociation inhibitor 1 OS=Rattus norvegicus GN=Arhgdia PE=1 SV=1 - [GDIR1_RAT]	23.3928	4.72791e+09	3.97284e+09	5.27763e+09	4.8102e+09	5.73328e+09	4.20763e+09	5.04069e+09	5.02547e+09	4.77031e+09	4.89729e+09	4.71484e+09	5.42154e+09	4.71268e+09	4.37713e+09	4.87816e+09	6.10423e+09	5.69937e+09	5.1839e+09	5.30136e+09	5.41558e+09	6.1873e+09	4.59617e+09	6.31964e+09	6.22184e+09	4.69292e+09	5.1741e+09	4.80277e+09	5.03843e+09	6.0096e+09	5.60845e+09	5.77649e+09	5.38709e+09	7948.34	6948.19	8366.16	7127.05	7482.93	5157.04	8440.54	8268.47	6003.5	6169.07	6313.88	6086.28	5646.64	5712.23	5770.02
P11884	Aldehyde dehydrogenase, mitochondrial OS=Rattus norvegicus GN=Aldh2 PE=1 SV=1 - [ALDH2_RAT]	56.4527	1.25236e+09	1.02854e+09	1.3008e+10	1.49828e+09	1.54551e+09	1.19728e+09	1.59667e+09	1.4098e+09	1.46042e+09	1.18689e+10	1.53008e+09	1654981271	1527291837	1536528002	1.76263e+10	2.02926e+09	1.40245e+10	1.73831e+09	1.94984e+09	1.90051e+09	2.00207e+09	1801726358	2.24245e+09	2.27126e+09	1.80106e+09	2.02993e+09	2.12149e+09	2.06545e+09	2.46063e+09	2.36807e+09	2.5795e+09	2.35039e+09	7710.42	6889.83	7993.43	7342.33	7383.03	6811.93	9527.71	9036.42	7206.15	7294.98	7425.96	7553.41	7022.09	7735.11	8157.25
P20059	Hemopexin OS=Rattus norvegicus GN=Hpx PE=1 SV=3 - [HEMO_RAT]	51.3183	1.33063e+09	1.13962e+09	1511674591	1.52805e+09	1.49989e+09	1355246288	1.55547e+09	1.40943e+09	2.32876e+09	2.21978e+09	2.44858e+09	2.43174e+09	2.48448e+09	2.50895e+09	3.01453e+09	3305893126	2.74035e+09	2.82719e+09	3000928505	2.83994e+09	2909728961	2.59918e+09	3.29767e+09	3.21741e+09	2.31044e+09	2.5805e+09	2.76666e+09	2.98932e+09	3.11745e+09	3.10956e+09	3.15185e+09	2.89222e+09	7694.14	6305.89	8879.42	7382.25	8194.23	5460.58	8824.11	9059.95	9599.09	9031.14	9846.37	9535.16	9960.41	9898.87	9982.36
P11598	Protein disulfide-isomerase A3 OS=Rattus norvegicus GN=Pdia3 PE=1 SV=2 - [PDIA3_RAT]	56.5877	2.29952e+09	2.41185e+09	2.70763e+09	3.01538e+09	2.88153e+09	3.08398e+09	3.03958e+09	2.74959e+09	2.72042e+09	2.2644e+09	2.97504e+09	3.02561e+09	2.97004e+09	2.75415e+09	3.47371e+09	3.52225e+09	3.2219e+09	2.55139e+09	3.61946e+09	3.35184e+09	3.60516e+09	3.23689e+09	3970189258	4077130920	3.10156e+09	3252187569	3.5798e+09	3.26789e+09	3887227807	3.78277e+09	4.22537e+09	3.58063e+09	7680.98	6912.3	8276.3	7475.11	8527.52	6953.82	8346.08	8388.53	7094.81	7416.98	7431.55	7391.43	7059.72	7184.18	7925.28
P50398	Rab GDP dissociation inhibitor alpha OS=Rattus norvegicus GN=Gdi1 PE=1 SV=1 - [GDIA_RAT]	50.5042	9.91494e+08	9.60224e+08	1.18689e+09	1.32542e+09	1.27622e+09	1.14686e+09	1.48293e+09	1431364760	9.99664e+08	8.53366e+08	1.14363e+09	1.12527e+09	1.14324e+09	1.04479e+09	1.40465e+09	1.55033e+09	1.12465e+09	9.1659e+08	1.28103e+09	1260558528	1272961609	1.18803e+09	1.46106e+09	1.56856e+09	1.12022e+09	1.1828e+09	1.24046e+09	1.33683e+09	1.33765e+09	1.36231e+09	1685603027	1.53328e+09	7614.14	6719.67	8308.92	7306.83	7239.56	6495.65	8187	8717.14	6408.5	5948.88	6168.02	6383.81	5798.99	5643.24	6288.31
P20760	Ig gamma-2A chain C region OS=Rattus norvegicus GN=Igg-2a PE=1 SV=1 - [IGG2A_RAT]	35.1634	1539830046	2509241915	2.13087e+09	2741523074	2.73514e+09	2.93129e+09	2.30046e+09	2.1371e+09	2881261493	2.53551e+09	3.17458e+09	2.70881e+09	3.47273e+09	3.30813e+09	3.35838e+09	3.63497e+09	2.90643e+09	2.04987e+09	3.83815e+09	3.49066e+09	4.1692e+09	3.51593e+09	3.52897e+09	3.72034e+09	4314188075	4.51622e+09	4.03326e+09	4.19412e+09	4.63828e+09	4.2455e+09	5.18504e+09	5098632765	7519.28	9306.3	9338.21	9019.1	9616.65	9792.56	9390.66	9165.41	8895.35	8031.8	8875.65	9289.96	9838.59	9121.53	9184.36
P11980	Pyruvate kinase PKM OS=Rattus norvegicus GN=Pkm PE=1 SV=3 - [KPYM_RAT]	57.7809	5.75074e+08	623279982	7.3125e+08	8.35347e+08	7.74049e+08	7.75038e+08	8.08465e+08	7.15959e+08	8.95701e+08	7.66836e+08	1.03388e+09	9.09673e+08	1.06919e+09	979331181	1.06011e+09	1.21392e+09	1.27349e+09	8.37815e+08	1.35758e+09	1.28544e+09	1.47834e+09	1.35337e+09	1.4706e+09	1.54555e+09	1.22636e+09	1.31294e+09	1.19948e+09	1.21636e+09	1.33049e+09	1.28099e+09	1499280064	1.37668e+09	7283.47	6285.03	7634.72	7044.42	6989.79	5172.19	7279.61	6757.57	6981.86	7358.19	7559.6	7432.47	6936.53	6817.31	7033.94
O35244	Peroxiredoxin-6 OS=Rattus norvegicus GN=Prdx6 PE=1 SV=3 - [PRDX6_RAT]	24.803	2.67645e+09	2.19285e+09	2.98115e+09	2.90466e+09	3.31776e+09	3.01866e+09	3.39722e+09	2.67224e+09	3.27882e+09	2.39718e+09	3.36385e+09	3.29841e+09	3.6063e+09	3.64915e+09	4.22468e+09	4.6471e+09	3.86749e+09	3.17727e+09	3.64219e+09	3.46024e+09	3.98292e+09	3.47164e+09	4723308950	4.36114e+09	3.35968e+09	3.83181e+09	3.71759e+09	3.43275e+09	4.72495e+09	4235236734	4.67315e+09	3.97462e+09	7204.48	6055.05	7125.66	6395.64	6648.97	5419.78	7268.33	6873.26	7214.55	6716.22	7017.08	7030.16	6411.82	6625.76	7041.21
Q64640	Adenosine kinase OS=Rattus norvegicus GN=Adk PE=1 SV=3 - [ADK_RAT]	40.1083	8.73447e+08	7.13088e+08	1.08928e+09	989998925	1.05565e+09	8.83372e+08	1.28896e+09	1117167875	8.45811e+08	7.97069e+08	9.67206e+08	9.50587e+08	9.62274e+08	9.48313e+08	1.3392e+09	1.22285e+09	1.0326e+09	9.24914e+08	1.11016e+09	9.55978e+08	1.13521e+09	1.04853e+09	1312739887	1.30623e+09	7.96475e+08	9.13235e+08	1.04215e+09	9.65627e+08	1.22839e+09	1.2438e+09	1.21031e+09	1.11047e+09	7093.46	6457.13	7237.91	6696.24	6978.86	6000.73	7809.42	7615.29	5692.01	6254.54	6655.55	7083.33	6323.84	6867.22	7090.06
Q9Z1J8	SEC14-like protein 3 OS=Rattus norvegicus OX=10116 GN=Sec14l3 PE=1 SV=1 - [S14L3_RAT]	45.9973	2.16339e+09	1.96212e+09	2.5623e+09	2.70807e+09	2.48267e+09	2.00738e+09	2.89165e+09	3.10814e+09	1.31549e+09	1.43511e+09	1.4248e+09	1.5536e+09	1.39517e+09	1.3998e+09	1.67635e+09	1.84558e+09	1.95258e+09	2.01624e+09	1.87946e+09	2.07284e+09	1.98522e+09	1712255002	2.34257e+09	2.33254e+09	1.8307e+09	2.10421e+09	2.20496e+09	2.05764e+09	2.51552e+09	2.62191e+09	2.4944e+09	2.38298e+09	7078.43	5888.79	6838.7	6728.82	6949.13	5714.63	6838.4	7590.93	4495.13	4256.43	4478.24	5026.76	4671.34	4654.83	5100.94
P04906	Glutathione S-transferase P OS=Rattus norvegicus GN=Gstp1 PE=1 SV=2 - [GSTP1_RAT]	23.4241	2.693e+09	2.02292e+09	3.14896e+09	2.98532e+09	3.52024e+09	2.65116e+09	3.38536e+09	3.59233e+09	5.55058e+09	5.25254e+09	5.75446e+09	6.28469e+09	5.89876e+09	5.68179e+09	7.14279e+09	8.63099e+09	6891492317	6.06888e+09	7057369578	6.52844e+09	7.22798e+09	5.99963e+09	7880817181	8.16101e+09	6026758140	6.64759e+09	6.69274e+09	6.74658e+09	7.38182e+09	6.62765e+09	7.75591e+09	6.64211e+09	7031.59	6215.95	7398	6846.91	6953.34	5939.94	7561	7670.4	7712.51	7193.94	8617.92	8829.69	7707.83	8934.15	9310.65
P25113	Phosphoglycerate mutase 1 OS=Rattus norvegicus GN=Pgam1 PE=1 SV=4 - [PGAM1_RAT]	28.8139	1.6077e+09	1.40038e+09	1730779376	1.88867e+09	1.90172e+09	1756507267	2.04868e+09	1.9207e+09	2.23143e+09	1.87777e+09	2.3229e+09	2.296e+09	2.40833e+09	2.11484e+09	2.97589e+09	3.1496e+09	2.53203e+09	2.23741e+09	2.778e+09	2.54276e+09	2.70094e+09	2.26591e+09	3289915550	2.81941e+09	2.2662e+09	2.3725e+09	2.56689e+09	2.64836e+09	3.09122e+09	2.91625e+09	2.93726e+09	2.63807e+09	6978.19	5761.17	6924.3	6516.75	6793.52	5420.86	7386.03	7073.78	7215.07	7400	7350.87	7320.41	6829.01	7405.01	7728.72
P13635	Ceruloplasmin OS=Rattus norvegicus GN=Cp PE=1 SV=3 - [CERU_RAT]	120.764	3.07423e+08	3.65539e+08	3.45067e+08	3.86967e+08	3.84016e+08	4.64088e+08	4.11168e+08	4.0441e+08	7.54564e+08	6.8771e+08	8.03361e+08	7.69126e+08	8.24109e+08	7.32986e+08	1.04026e+09	1.01918e+09	9.04256e+08	8.07561e+08	1.05702e+09	9.46754e+08	1.12059e+09	9.30999e+08	1.23533e+09	1.22813e+09	830793105	9.1821e+08	9.725e+08	9.65938e+08	1.14544e+09	1.11074e+09	1.19952e+09	1094648993	6795.85	6133.55	7173.31	6430.48	5954.47	6475.97	6782.52	7591.43	8752.35	8806.54	8938.23	9174.35	8753.78	8272.64	9375.9
B0BNN3	Carbonic anhydrase 1 OS=Rattus norvegicus GN=Ca1 PE=1 SV=1 - [CAH1_RAT]	28.2822	2.9896e+09	2.8855e+09	3.31398e+09	3304542681	3872759320	2.93664e+09	3.97577e+09	3.85311e+09	1999572397	1.96688e+09	2.25821e+09	2.46178e+09	2.25936e+09	1.92301e+09	2.6887e+09	3.0474e+09	1.62508e+09	1660638313	1.72404e+09	1.73746e+09	1.88228e+09	1.57877e+09	2.24122e+09	2.22948e+09	1934531919	1.96245e+09	2.11417e+09	2.30365e+09	2.42634e+09	2.22438e+09	2.56831e+09	2.45253e+09	6793.63	6249.35	7458.3	6785.62	6780.35	5690.97	6879.48	7036.98	5182.04	5486.2	5887.48	5808.76	5166.75	5471.12	5970.03
O88767	Protein DJ-1 OS=Rattus norvegicus GN=Park7 PE=1 SV=1 - [PARK7_RAT]	19.9614	2.10255e+09	1.49027e+09	2.1788e+09	2.08448e+09	2.28559e+09	1.70151e+09	2.40152e+09	2.01269e+09	2.25269e+09	1.89676e+09	2.33849e+09	2.39386e+09	2.32125e+09	2.17151e+09	2.68339e+09	2.78976e+09	2.92538e+09	2.36757e+09	2.68958e+09	2.78948e+09	2.8911e+09	2.51358e+09	3528966654	3.02111e+09	2308848644	2.4798e+09	2.68613e+09	2.40216e+09	2.84966e+09	2.73647e+09	2.67149e+09	2.44928e+09	6790.5	5694.06	6757.96	6241.11	6366.36	5096.23	6722.1	6264.95	6129.18	6657.13	6417.5	7686.87	6481.38	6844.59	7663.7
P07335	Creatine kinase B-type OS=Rattus norvegicus GN=Ckb PE=1 SV=2 - [KCRB_RAT]	42.6983	7.64467e+08	8.12374e+08	8.80483e+08	1.00132e+09	9.66912e+08	1124861413	9.58939e+08	8.75541e+08	1784220164	1.52615e+09	1.73703e+09	1.81451e+09	1.96862e+09	1749815723	2256407154	2.8014e+09	2.12982e+09	1.7725e+09	2.25431e+09	2.25416e+09	2.65295e+09	2.18231e+09	2.95416e+09	2.96263e+09	1.37242e+09	1.44674e+09	1350612167	1442760549	1.70285e+09	1.6095e+09	2070728481	1.98996e+09	6765.76	6561.12	6505.13	6641.82	5296.01	5431.72	6381.43	6401.94	7749.65	8338.97	8417.72	8328.67	7290.19	7691.15	7269.84
P23457	3-alpha-hydroxysteroid dehydrogenase OS=Rattus norvegicus GN=Akr1c9 PE=1 SV=1 - [DIDH_RAT]	37.0039	2.23609e+09	1.65319e+09	2.33285e+09	2.6004e+09	2.58212e+09	2.1118e+09	2.42953e+09	2.64533e+09	4.42456e+08	3.74687e+08	5.31002e+08	6.79595e+08	6.32234e+08	4.58924e+08	7.82592e+08	6.69769e+08	5.59542e+08	5.87789e+08	5.29554e+08	5.83567e+08	5.45902e+08	7.33797e+08	6.57576e+08	8.88556e+08	4.59872e+08	5.23761e+08	6.72479e+08	6.8002e+08	6.60984e+08	7.50893e+08	916914824	5.79985e+08	6694.3	5617	7039.85	6176.99	6602.21	5317.6	7380.11	7177.15	2690.08	2541.8	2887.02	2878.21	2455.26	2490.65	2892.1
P08010	Glutathione S-transferase Mu 2 OS=Rattus norvegicus GN=Gstm2 PE=1 SV=2 - [GSTM2_RAT]	25.686	1.65306e+09	1.41388e+09	1.77207e+09	2.16979e+09	2.04203e+09	1.84279e+09	2.25511e+09	2272779425	1.75141e+09	1.47344e+09	1.90053e+09	1.90385e+09	2.00164e+09	1.87945e+09	2.5013e+09	2.49642e+09	1.7811e+09	1.52152e+09	1.70887e+09	1.822e+09	2073087462	1.85541e+09	2.46563e+09	2.30621e+09	1.72175e+09	1.85184e+09	2.23273e+09	2.03398e+09	2.40863e+09	2259811082	2.37729e+09	2118222692	6618.32	6337.25	7333.21	6674.77	6635.87	5628.49	7668.19	7796.6	6961.57	6326.25	6787.58	6511.21	6855.77	6569.48	7277.15
P09495	Tropomyosin alpha-4 chain OS=Rattus norvegicus GN=Tpm4 PE=1 SV=3 - [TPM4_RAT]	28.4925	4.40634e+09	2.91073e+09	2.75264e+09	2.89726e+09	3.30585e+09	2.06984e+09	1.32795e+09	2.67406e+09	5.43916e+09	4.67106e+09	3.27104e+09	3.97383e+09	3.48586e+09	2.65846e+09	3.30284e+09	3.98969e+09	6.2171e+09	4.7573e+09	2.56056e+09	3929186889	3.98802e+09	3.05473e+09	5.14926e+09	2.66843e+09	4.38499e+09	4.27758e+09	3872305968	2.77439e+09	3.29742e+09	4.41536e+09	2.46283e+09	3.24754e+09	6593.88	4640.06	5015.99	4479.03	6590.75	4388.73	5075.32	7328.81	5004.6	5260.04	3861.6	5066.97	5641.96	4793.58	4670.2
P29315	Ribonuclease inhibitor OS=Rattus norvegicus GN=Rnh1 PE=1 SV=2 - [RINI_RAT]	49.9422	3.85093e+08	3.80985e+08	5.01443e+08	5.16726e+08	4.88702e+08	422307853	5.05047e+08	4.61236e+08	3.39971e+08	3.45468e+08	3.7213e+08	4.16542e+08	3.81143e+08	345626271	4.03065e+08	4.87302e+08	4.27251e+08	3.95599e+08	4.5253e+08	4.72122e+08	4.59037e+08	3.93034e+08	5.26615e+08	6.32382e+08	4.9745e+08	432702528	4.8676e+08	4.72247e+08	5.48043e+08	5.3616e+08	5.92633e+08	5.42601e+08	6582.46	4439.09	6666.27	4813.7	6130.59	4955.04	7051.65	7248.7	4201.56	4293.04	4591.8	4775.05	4442.03	4532.56	5064.63
A7VJC2	Heterogeneous nuclear ribonucleoproteins A2/B1 OS=Rattus norvegicus GN=Hnrnpa2b1 PE=1 SV=1 - [ROA2_RAT]	37.4547	4091674421	3.55146e+09	4.12694e+09	4.40248e+09	4.69493e+09	4.14092e+09	3.94772e+09	3.52607e+09	4.80105e+09	4.30686e+09	4.54854e+09	4.94462e+09	4.80838e+09	4.62281e+09	4.90635e+09	5.51918e+09	5.53094e+09	4.63752e+09	4.96889e+09	4.83695e+09	6075460384	4.65183e+09	5.66743e+09	5.65812e+09	4.27803e+09	4.62961e+09	4.36019e+09	3.94967e+09	5.71892e+09	5.20127e+09	5.04029e+09	4.85985e+09	6459.17	6583.97	6832.34	7334.34	15414.7	12325.6	13367	13866.1	5930.76	5662.12	5585.76	5916.5	10841	9809.26	7171.02
P10760	Adenosylhomocysteinase OS=Rattus norvegicus GN=Ahcy PE=1 SV=3 - [SAHH_RAT]	47.5072	9.53007e+08	9.262e+08	1.08768e+09	1.22321e+09	1.19192e+09	1.11807e+09	1.334e+09	1.40463e+09	9.69615e+08	9.31183e+08	1.14872e+09	1.11112e+09	9.19841e+08	8.91813e+08	1.36328e+09	1.30618e+09	1.3139e+09	1.07407e+09	1.31867e+09	1.28546e+09	1.42748e+09	1.16439e+09	1.58769e+09	1.48543e+09	1.08403e+09	1.3218e+09	1.2382e+09	1.09613e+09	1.58946e+09	1.44767e+09	1.53871e+09	1512682644	6337.99	5910.42	7027.21	6334.63	6521.75	5801.79	6447.37	6285.02	5936.22	5950.35	5946.95	5644.11	6113.57	6284.42	6205.18
Q63416	Inter-alpha-trypsin inhibitor heavy chain H3 OS=Rattus norvegicus GN=Itih3 PE=2 SV=1 - [ITIH3_RAT]	99.0357	4.58599e+08	4.29214e+08	593543750	6.0207e+08	5.75695e+08	5.95192e+08	6.05601e+08	604758843	7.5099e+08	7.16648e+08	8.02368e+08	7.82989e+08	8.14341e+08	7.942e+08	1.03387e+09	1177195541	7.7844e+08	7.73678e+08	9.77797e+08	8.51672e+08	1.00783e+09	8.12928e+08	1.11792e+09	1.0753e+09	9.15047e+08	1.03887e+09	1.01144e+09	1.01567e+09	1.409e+09	3.10436e+09	1258737567	1.14267e+09	6141.29	6072.12	6908.65	5795.76	6573.14	5624.67	7230.56	7072.94	7079.96	7213.93	8202.4	7634.99	7648.84	7814.43	7456.44
P04639	Apolipoprotein A-I OS=Rattus norvegicus GN=Apoa1 PE=1 SV=2 - [APOA1_RAT]	30.0432	2.47371e+09	3.22502e+09	3.36704e+09	4.15705e+09	3.43117e+09	4.2089e+09	3.32575e+09	3.20691e+09	6.80393e+09	6.0384e+09	6.52887e+09	7.07591e+09	7553406579	6417518759	7.38661e+09	9.03981e+09	7.15799e+09	5.36894e+09	6.92673e+09	6.93719e+09	8.05315e+09	6.65342e+09	7.48769e+09	8.47757e+09	6.4155e+09	6.74017e+09	6.25271e+09	6.66026e+09	7.77253e+09	7.25899e+09	8.02756e+09	7.49426e+09	6124.26	6313.58	6590.89	6496.52	6557.06	6454.18	6937.69	7059.71	7264.45	8150.45	7407.9	7970.3	8702.48	8695.52	9206.37
P48500	Triosephosphate isomerase OS=Rattus norvegicus GN=Tpi1 PE=1 SV=2 - [TPIS_RAT]	26.8318	2.53852e+09	1.884e+09	2.71036e+09	2.73741e+09	2.87718e+09	2.24613e+09	2.96294e+09	3.03913e+09	2.45168e+09	1.86314e+09	2.40365e+09	2.59594e+09	2.64235e+09	2.18509e+09	3.22616e+09	3.38345e+09	3.17074e+09	2.34671e+09	2.99869e+09	2.95663e+09	3.15939e+09	2.76502e+09	3.73299e+09	3.51277e+09	2.41341e+09	2.71795e+09	2.79748e+09	2.52008e+09	3.28315e+09	2.87931e+09	3.12781e+09	2.75906e+09	6075.02	4529.9	6359.77	4900.47	5649.87	4690.17	5973.18	5863.5	4783.06	4965.97	4953.08	5225.38	4376.52	4414.64	5046.63
D3ZF77	Aldo-keto reductase family 1 member C15 OS=Rattus norvegicus OX=10116 GN=Akr1c15 PE=1 SV=1 - [AK1CA_RAT]	37.1711	1.6094e+09	1.29277e+09	1.70503e+09	1.86736e+09	1.90345e+09	1.61185e+09	1.8865e+09	1809174722	6.75569e+08	5.86399e+08	6.93922e+08	7.53768e+08	7.53137e+08	770102785	878136414	978391937	6.7978e+08	6.34898e+08	6.1589e+08	659309027	7.11223e+08	6.49331e+08	7.93996e+08	7.7204e+08	5.23852e+08	5.95953e+08	602931714	5.97865e+08	7.14518e+08	6.75666e+08	757354910	6.92238e+08	6010.91	4929.42	6205.22	5117.36	5575.09	4685.16	6112.27	5858.64	2643.51	3160.27	2930.34	3158.84	3209.21	3100.35	3304.83
P11442	Clathrin heavy chain 1 OS=Rattus norvegicus GN=Cltc PE=1 SV=3 - [CLH1_RAT]	191.477	1.69308e+08	4.56108e+08	3.02335e+08	6.16456e+08	1.20614e+08	6.59823e+08	2.70807e+08	2.60035e+08	4.54154e+08	3.99024e+08	4.14098e+08	4.46937e+08	4.71865e+08	4.84265e+08	5.36226e+08	6.73964e+08	5.08439e+08	3.95265e+08	6.40383e+08	5.82013e+08	6.97639e+08	6.04112e+08	7.15711e+08	7.91428e+08	5.81652e+08	7.05215e+08	5.33626e+08	566294478	7.00919e+08	6.76e+08	8.54829e+08	8.19362e+08	5991.8	13506.5	11904.4	15187.2	4320.31	14265.1	10313.8	9163.79	9041.86	9642.61	9670.39	9347.57	10598.3	9540.75	8459.98
P04276	Vitamin D-binding protein OS=Rattus norvegicus OX=10116 GN=Gc PE=1 SV=3 - [VTDB_RAT]	53.509	5.56838e+08	5.95834e+08	6.47893e+08	5.83431e+08	6.98247e+08	6.51966e+08	7.63159e+08	756962030	1.34771e+09	1.35783e+09	1.50913e+09	1.49722e+09	1.49373e+09	1.62627e+09	1.97626e+09	1.81883e+09	1.66644e+09	1.57279e+09	1.74183e+09	1.41625e+09	1850093298	1.41045e+09	2.17163e+09	2.13067e+09	1.52672e+09	1.68163e+09	1.55487e+09	1.66297e+09	2.13499e+09	1.92144e+09	2.03777e+09	1.88337e+09	5967.71	4897.01	5546.77	5972.52	5611.97	5392.98	6471.12	6479.79	7970.74	8856.46	8684.83	9101.01	8622.83	9387.3	9769.58
Q00438	Polypyrimidine tract-binding protein 1 OS=Rattus norvegicus GN=Ptbp1 PE=1 SV=1 - [PTBP1_RAT]	59.3166	3.95675e+08	4.86361e+08	4.79121e+08	5.93977e+08	4.81384e+08	7.35858e+08	4.61626e+08	4.78768e+08	5.37872e+08	4.47023e+08	5.26849e+08	4.91196e+08	5.57263e+08	6.18757e+08	552232081	6.45126e+08	7.4889e+08	5.64139e+08	9.28517e+08	8.77725e+08	1076700615	8.59232e+08	1.00307e+09	9.8037e+08	4.92263e+08	5.593e+08	4.76177e+08	4.78787e+08	6.1492e+08	5.6009e+08	6.4224e+08	7.69944e+08	5859.5	6124.58	6484.86	6396.64	6237.38	6373.99	5840.71	6879.91	5932.15	6427.95	5711.52	6303.2	6161.12	6100.01	5409.32
O55096	Dipeptidyl peptidase 3 OS=Rattus norvegicus GN=Dpp3 PE=1 SV=2 - [DPP3_RAT]	82.9869	3.69305e+08	3.25565e+08	3.92552e+08	4.0312e+08	3.73454e+08	3.90442e+08	3.66147e+08	3.14494e+08	3.96565e+08	401427868	3.89272e+08	4.41403e+08	3.97695e+08	3.8611e+08	4.92063e+08	5.2605e+08	455279182	4.32261e+08	4.31204e+08	4.03721e+08	5.10747e+08	3.76565e+08	5.0281e+08	5.45743e+08	3.92912e+08	4.97444e+08	4.59682e+08	4.17461e+08	5.39845e+08	5.44676e+08	5.52372e+08	4.61808e+08	5849.89	4797.27	6034.22	5603.09	5519.72	4821.55	5781.38	6675.15	4330.14	4267.02	4259.84	4404.16	3998.19	3961.06	5101.06
O88989	Malate dehydrogenase, cytoplasmic OS=Rattus norvegicus GN=Mdh1 PE=1 SV=3 - [MDHC_RAT]	36.46	2.78094e+09	2.47653e+09	3309442185	3425908487	3.46547e+09	2.65937e+09	5.11516e+09	4.42453e+09	2.45661e+09	2428663639	3.05897e+09	3.1695e+09	3.18265e+09	2.69794e+09	3.80973e+09	4013618108	3.03226e+09	2.94789e+09	3.79153e+09	3.54671e+09	3.64247e+09	3283538225	4.22809e+09	4413380888	2.80564e+09	3.16239e+09	3.83442e+09	3.57408e+09	3.8904e+09	3.86034e+09	4.18386e+09	3.93388e+09	5805.07	4877.22	5822.63	5945.33	6330.46	5222.61	5959.09	5917.22	4503.13	4852.22	5380.12	5396.08	4994.1	5215.72	5136.43
P02651	Apolipoprotein A-IV OS=Rattus norvegicus GN=Apoa4 PE=1 SV=2 - [APOA4_RAT]	44.4287	1.52184e+09	1.60262e+09	1.74e+09	1.95539e+09	2.05682e+09	2.05371e+09	2.10548e+09	2.09688e+09	3.48515e+09	2.88036e+09	3.44532e+09	3.82616e+09	4.01429e+09	3.34421e+09	4.41145e+09	4.57603e+09	3.37883e+09	2939401521	3.60372e+09	3.6123e+09	4.56631e+09	3.88116e+09	5.36908e+09	5.0312e+09	3.1449e+09	3.16806e+09	3.44663e+09	3.69867e+09	4.31624e+09	4.03075e+09	4.6749e+09	4.47242e+09	5715.86	5486.24	6030.41	6293.36	7223.92	7097.35	6547.65	6319.11	8792.3	7189.09	8145.39	8354.21	8957.38	8693.88	9453.37
Q9WTT6	Guanine deaminase OS=Rattus norvegicus GN=Gda PE=1 SV=1 - [GUAD_RAT]	50.9838	736198864	8.77732e+08	9.72198e+08	1.19177e+09	9.83697e+08	1.10152e+09	1.08292e+09	8.00566e+08	5.73897e+08	5.36439e+08	6.07004e+08	6.3553e+08	7.90776e+08	5.41407e+08	757301750	9.2575e+08	5.97068e+08	5.01882e+08	6.32919e+08	5.6591e+08	8.552e+08	552618044	7.44101e+08	7.3057e+08	505390819	5.16397e+08	5.48478e+08	5.44042e+08	6.78243e+08	6.4613e+08	7.06135e+08	669347495	5641.57	4284.95	5250.25	5423.66	5790.95	4669.66	5804.57	5973.2	3439.07	3827.97	3597.56	3457.93	3068.41	3293.87	4060.12
Q6URK4	Heterogeneous nuclear ribonucleoprotein A3 OS=Rattus norvegicus GN=Hnrnpa3 PE=1 SV=1 - [ROA3_RAT]	39.6276	2.80792e+09	2.69211e+09	3.00054e+09	3.42328e+09	3.56608e+09	3.71092e+09	3.25814e+09	3.03832e+09	4.25215e+09	3.84728e+09	4.24981e+09	4.31381e+09	4.66881e+09	4.43507e+09	4.97587e+09	5493030831	5.11826e+09	4.30844e+09	5.20204e+09	4.64847e+09	6.17844e+09	5.25061e+09	5.75968e+09	6185074157	4.06699e+09	4.32007e+09	4215730769	4043766765	5.33271e+09	4.83172e+09	5.21052e+09	4.8846e+09	5627.77	4805.74	5811.72	5194.05	4397.8	4512.66	5216.76	5309.74	5102.35	5604.36	5071.19	5248.89	5652.17	5490.16	5693.2
P04636	Malate dehydrogenase, mitochondrial OS=Rattus norvegicus GN=Mdh2 PE=1 SV=2 - [MDHM_RAT]	35.6608	1295397086	1.23299e+09	1.39985e+09	1.61761e+09	1.60348e+09	1.55919e+09	1.51092e+09	1.49102e+09	1.9823e+09	1.64119e+09	2.02745e+09	2112270225	2.05212e+09	2037644028	2.59897e+09	2.81435e+09	2.40958e+09	1991880531	2.3432e+09	2.39479e+09	2.66267e+09	2.28813e+09	3.1785e+09	3.18134e+09	2.25678e+09	2.45962e+09	2.55153e+09	2.61184e+09	3071688701	2.76823e+09	3.30916e+09	3.14182e+09	5608.47	4539.69	5604.78	4713.61	4676.11	4619.13	5923.99	6004.86	5370.98	5404.03	5581.33	5789.43	5493.96	5930.31	5780.56
P61983	14-3-3 protein gamma OS=Rattus norvegicus GN=Ywhag PE=1 SV=2 - [1433G_RAT]	28.2849	7.39525e+09	6506442017	8.34157e+09	9.26097e+09	8.10436e+09	7.66046e+09	9.17553e+09	9.61344e+09	6.87524e+09	6.00097e+09	6.94883e+09	7.55026e+09	6.69766e+09	6588450419	7.94003e+09	8.36759e+09	7.23883e+09	6.18423e+09	7170297742	7.21172e+09	7.25976e+09	6.8292e+09	8.90615e+09	8.21994e+09	6.31516e+09	6.11129e+09	6.7249e+09	6.67878e+09	7.33097e+09	7.51871e+09	7.92661e+09	7.60827e+09	5563	5413.95	6390.4	5627.25	5477.77	5127.71	6078.16	5972.54	5380.45	5496.61	5808.92	5638.71	5294.74	5294.3	5426.57
P14659	Heat shock-related 70 kDa protein 2 OS=Rattus norvegicus GN=Hspa2 PE=1 SV=2 - [HSP72_RAT]	69.5987	4474417516	4035637828	5.73109e+09	5.2059e+09	4935644569	4.77561e+09	6.32098e+09	6.55186e+09	5.16692e+09	4.72737e+09	5.70834e+09	5764562864	5.5121e+09	5.35422e+09	6951830017	7.20635e+09	5.71286e+09	5.41076e+09	6.53887e+09	5.86146e+09	6.35059e+09	5.88238e+09	7.26473e+09	7.82326e+09	5.50603e+09	5.45987e+09	7.19318e+09	7124750926	7.1553e+09	7.66055e+09	8.30375e+09	7.46207e+09	5558.82	5951.16	7053.25	5658.1	6810.34	6422.46	7321.59	5146.11	6378.24	6365.64	5873.21	5625.26	6300.72	6490.82	6317.54
P63269	Actin, gamma-enteric smooth muscle OS=Rattus norvegicus GN=Actg2 PE=2 SV=1 - [ACTH_RAT]	41.8498	5.1238e+09	1.04523e+10	6.5935e+09	9.93225e+09	6.14594e+09	12296837500	5.59567e+09	6.27923e+09	1.62785e+10	1.63132e+10	1.54701e+10	1.53707e+10	1.96412e+10	1.69716e+10	1.49957e+10	2.00278e+10	1.90913e+10	1.65848e+10	2.30765e+10	2.36514e+10	2.66099e+10	2.33257e+10	2.21475e+10	25225837957	1.47642e+10	1.62579e+10	1.27793e+10	1.47167e+10	1.3938e+10	1.41753e+10	1.99993e+10	1.93879e+10	5393.02	6823.98	5318.47	6373.38	4883.71	6549.71	5294.21	6159.6	9154.31	8810.04	9326.96	8122.64	8857.22	8465.72	8160.49
Q63610	Tropomyosin alpha-3 chain OS=Rattus norvegicus GN=Tpm3 PE=1 SV=2 - [TPM3_RAT]	28.9887	4.29324e+09	3.0925e+09	3.0773e+09	2.99326e+09	3.6543e+09	2.22548e+09	1.71579e+09	3.99757e+09	5344775321	4.67105e+09	3.66068e+09	4.24457e+09	3.8411e+09	2.84955e+09	3.38617e+09	4.00761e+09	6114086238	4.86214e+09	2.89003e+09	4091752083	4.21246e+09	3.22964e+09	4.99249e+09	2.90233e+09	4.35816e+09	4.31879e+09	3.98455e+09	3.11202e+09	3.58189e+09	4.39992e+09	2.75892e+09	3.3046e+09	5365.72	3812.78	4490.19	4061.82	6502.94	4947.87	5128.17	5858.51	5061.15	4994.33	4210.51	4964.35	5536.31	5364.26	4652.58
P15429	Beta-enolase OS=Rattus norvegicus GN=Eno3 PE=1 SV=3 - [ENOB_RAT]	46.9843	1.94296e+09	1.69622e+09	2.12184e+09	2.1121e+09	2.53475e+09	1.9696e+09	2.2716e+09	2343204493	2.27269e+09	1.861e+09	2202752648	2.39282e+09	2.50477e+09	2.37657e+09	2.75913e+09	3.08847e+09	2.5007e+09	2.33289e+09	2.41609e+09	2.61487e+09	2.83327e+09	2.21252e+09	3111908926	3.25918e+09	2.10881e+09	2.21634e+09	2.22344e+09	2.26445e+09	2827029857	2.55555e+09	2.97514e+09	2616252678	5346.8	4168.75	5700.09	4856.67	5332.35	4830.23	5994.22	6239.21	5721.71	5416.02	6210.18	5525.48	5904.6	5904.22	6028.19
P16303	Carboxylesterase 1D OS=Rattus norvegicus OX=10116 GN=Ces1d PE=1 SV=2 - [EST1D_RAT]	62.1077	6.4853e+08	5.50139e+08	7.07804e+08	721736039	7.94236e+08	6.85966e+08	7.74186e+08	8.40273e+08	9.03501e+08	7.82317e+08	9.03454e+08	9.42567e+08	9.36751e+08	8.91861e+08	1.20873e+09	1.33037e+09	9.76545e+08	8.7022e+08	1.04018e+09	1.04573e+09	1.02384e+09	9.19817e+08	1.2516e+09	1.34817e+09	9.36078e+08	1.02713e+09	1.09963e+09	1.05044e+09	1.30075e+09	1.1814e+09	1.3211e+09	1.28672e+09	5273.73	5094.32	5822.07	4935.68	4962.86	3956.07	5899.66	5579.8	5732.09	6274.93	6137.9	6453.48	5430.72	5714.39	5831.21
P20070	NADH-cytochrome b5 reductase 3 OS=Rattus norvegicus GN=Cyb5r3 PE=1 SV=2 - [NB5R3_RAT]	34.1527	6.76901e+08	5.90297e+08	7.91269e+08	9.00955e+08	9.4348e+08	8.25973e+08	9.2177e+08	8.38101e+08	905923465	8.06987e+08	9.79402e+08	9.52954e+08	964881233	959879874	1134691432	1.25482e+09	9.95939e+08	8.89514e+08	1.1005e+09	1.11094e+09	1150029712	1.05794e+09	1.33538e+09	1.42708e+09	1.06202e+09	1.18526e+09	1.19075e+09	1.17746e+09	1.36151e+09	1.33648e+09	1.48737e+09	1.33508e+09	5256.87	4567.81	5584.76	5407.05	5334.6	4720.26	5767.31	5946.03	4340.91	4842.35	4978.83	4749.46	4408.11	5601.32	4992.71
Q63716	Peroxiredoxin-1 OS=Rattus norvegicus GN=Prdx1 PE=1 SV=1 - [PRDX1_RAT]	22.0953	3.02766e+09	3.02271e+09	3.46578e+09	3.6439e+09	3.64573e+09	3.19171e+09	4.02926e+09	3.68953e+09	4.55464e+09	4.40021e+09	4.92034e+09	5.11967e+09	5.23164e+09	4.54685e+09	6.39613e+09	6.89058e+09	5.31786e+09	4.48544e+09	5.36492e+09	5.63388e+09	6.25037e+09	5.70266e+09	7.30987e+09	6.56793e+09	4.70055e+09	5088574749	5.51171e+09	5.68686e+09	5.93611e+09	6.39885e+09	6634172712	6.19811e+09	5241.8	4516.98	5235.73	4697.31	6172.5	4856.8	4891.33	4723.87	6307.88	5800.49	5716.76	6269.11	6877.8	6067.4	6893.83
P68136	Actin, alpha skeletal muscle OS=Rattus norvegicus GN=Acta1 PE=1 SV=1 - [ACTS_RAT]	42.0239	5.1238e+09	1.04523e+10	6.5935e+09	9.93225e+09	6.14594e+09	12296837500	5.59567e+09	6.27923e+09	1.62785e+10	1.63132e+10	1.54701e+10	1.53707e+10	1.96412e+10	1.69716e+10	1.49957e+10	2.00278e+10	1.90913e+10	1.65848e+10	2.30765e+10	2.36514e+10	2.66099e+10	2.33257e+10	2.21475e+10	25225837957	1.47642e+10	1.62579e+10	1.27793e+10	1.47167e+10	1.3938e+10	1.41753e+10	1.99993e+10	1.93879e+10	5238.25	6220.54	4965.24	6116.7	4993.31	6300.42	5346.89	6049.51	7798.01	7647.48	8098.87	7111.35	7852.09	7498.6	7079.68
Q63797	Proteasome activator complex subunit 1 OS=Rattus norvegicus GN=Psme1 PE=2 SV=1 - [PSME1_RAT]	28.559	661773585	5.99932e+08	6.0306e+08	7.32356e+08	7.78661e+08	5.6546e+08	5.876e+08	8.57361e+08	8.02522e+08	7.77809e+08	7.13404e+08	8.55256e+08	8.30143e+08	6.75215e+08	9.62186e+08	1.11108e+09	9.1764e+08	7.17693e+08	7.90235e+08	9.46247e+08	7.87565e+08	7.52383e+08	1.18549e+09	8.91201e+08	8.0951e+08	894730233	8.64592e+08	8.3899e+08	8.52369e+08	9.96674e+08	8.48845e+08	1.14856e+09	5079.21	4347.86	4804.99	5216.31	4775.63	3810.04	4634.7	4659.44	5082.74	5489.03	4712.87	5833.01	5386.59	4933.14	5602.85
P04256	Heterogeneous nuclear ribonucleoprotein A1 OS=Rattus norvegicus GN=Hnrnpa1 PE=1 SV=3 - [ROA1_RAT]	34.1912	1.88023e+09	1.57941e+09	1.99796e+09	2.02247e+09	2.19387e+09	2210260533	2.08561e+09	2.09374e+09	2.16064e+09	1.97491e+09	2243548647	2.21868e+09	2.31614e+09	2.36323e+09	2.56108e+09	2.74275e+09	2408388663	2.32751e+09	2.47291e+09	2.19022e+09	3.02569e+09	2.49059e+09	2.85544e+09	3.11447e+09	1.9771e+09	2.43701e+09	2.12857e+09	2.04911e+09	2.97758e+09	2469494971	2.56198e+09	2.38302e+09	5063.99	4768.52	5218.75	4984.43	12825.2	10466.4	10854.7	11466.6	4802.45	5092.17	4811.32	4961	9665.02	8189.99	5936.37
Q68FR6	Elongation factor 1-gamma OS=Rattus norvegicus GN=Eef1g PE=1 SV=3 - [EF1G_RAT]	50.0292	3.61436e+08	4.71388e+08	5.20715e+08	6.39641e+08	5.20689e+08	6.63872e+08	7.17089e+08	5.04096e+08	7.31162e+08	6.87369e+08	7.72645e+08	7.32761e+08	8.24267e+08	7.13694e+08	1.04945e+09	1.16114e+09	8.54892e+08	6.86643e+08	1095743059	9.58957e+08	1.07237e+09	8.0294e+08	1.11898e+09	1.08163e+09	8.10542e+08	9.84148e+08	8.44277e+08	9.10881e+08	1.09714e+09	1.00352e+09	1.20217e+09	1.08052e+09	5038.54	4716.19	5990.2	5319.84	6014.29	5036.32	5865.33	5647.41	5924.72	6035.77	6046	6193.05	6337.53	5907.99	6012.97
Q9JLT0	Myosin-10 OS=Rattus norvegicus GN=Myh10 PE=1 SV=1 - [MYH10_RAT]	228.824	3.56326e+08	3.21101e+08	2.96321e+08	4.09489e+08	3.49691e+08	3.04292e+08	1.92933e+08	3.73687e+08	6.09092e+08	5.94247e+08	8.35055e+08	2.91717e+09	7.23798e+08	7.19477e+08	2.2947e+09	8.31287e+08	9.78322e+08	7.87923e+08	9.10001e+08	1.0044e+09	8.40222e+08	8.85243e+08	1.11337e+09	8.37042e+08	4.88463e+08	6.34959e+08	5.23656e+08	6.27054e+08	4.50631e+08	7.4754e+08	6.32923e+08	7.10537e+08	5024.51	4500.78	4305.27	4417.55	3887.83	3330.68	3271.39	4297.09	7325.77	7526.56	6707.94	7683.54	7067.35	5884.03	6238.4
Q63598	Plastin-3 OS=Rattus norvegicus GN=Pls3 PE=2 SV=2 - [PLST_RAT]	70.6351	5.90967e+08	6.35482e+08	6.74626e+08	8.09434e+08	7.59985e+08	7.72272e+08	8.34877e+08	8.76129e+08	8.82181e+08	8.31486e+08	8.69508e+08	1.02662e+09	9.90818e+08	9.64371e+08	1.17312e+09	1.31568e+09	1.00515e+09	9.45555e+08	9.61855e+08	1.10941e+09	1.17115e+09	1013651547	1.24835e+09	1.32314e+09	1.02962e+09	1.16624e+09	1.15518e+09	1.11791e+09	1.30033e+09	1.36644e+09	1.40693e+09	1.43829e+09	5001.34	4789.39	5730.02	5593.78	6083.89	5704.52	7442.7	7778.26	5797.11	5773.31	6799.22	6654.17	7032.66	7421.16	7159.83
P04692	Tropomyosin alpha-1 chain OS=Rattus norvegicus GN=Tpm1 PE=1 SV=3 - [TPM1_RAT]	32.6607	4.20484e+09	2.90003e+09	2.84555e+09	2.84011e+09	3.48764e+09	2.11047e+09	1.5836e+09	3.98192e+09	5.11333e+09	4518115053	3.49915e+09	4.04374e+09	3.69756e+09	2.74102e+09	3.28316e+09	3.87656e+09	5.9073e+09	4.66358e+09	2.74458e+09	3.9408e+09	4.16341e+09	3.171e+09	4.90261e+09	2.87809e+09	4.22978e+09	4.23424e+09	3.79718e+09	2.93839e+09	3.48085e+09	4.27501e+09	2.67513e+09	3248197089	4988.11	3030.84	3539.97	2853.28	5866.57	2690.91	3398.57	3877.15	3720.25	3825.03	3072.2	3657.66	3993.95	3594.29	3462.63
P68511	14-3-3 protein eta OS=Rattus norvegicus GN=Ywhah PE=1 SV=2 - [1433F_RAT]	28.194	7.39525e+09	6506442017	8.34157e+09	9.26097e+09	8.10436e+09	7.66046e+09	9.17553e+09	9.61344e+09	6898479576	6.05682e+09	6.94883e+09	7.55026e+09	6.70628e+09	6588450419	7.94003e+09	8.36759e+09	7.27704e+09	6.20464e+09	7.22288e+09	7.29546e+09	7387569880	6.95757e+09	8.90615e+09	8.21994e+09	6426498101	6293573375	6.81311e+09	6.67878e+09	7.47911e+09	7.51871e+09	7.92661e+09	7.60827e+09	4972.2	4558.39	5345.49	4755.1	5321.05	4519.8	5398.09	5569	4596.99	4826.41	4993.97	4646.81	4736.8	4819.85	4599.99
P51647	Retinal dehydrogenase 1 OS=Rattus norvegicus GN=Aldh1a1 PE=1 SV=3 - [AL1A1_RAT]	54.424	5.70623e+08	5.99072e+08	1.25109e+10	7.67638e+08	7.63774e+08	6.61924e+08	7.94888e+08	771570283	1.01407e+09	11652579768	1.04056e+09	1.12695e+09	1.11148e+09	1.06055e+09	1.71606e+10	1.33713e+09	1.36852e+10	1.10526e+09	1.26669e+09	1.33057e+09	1.3885e+09	1.32183e+09	1.59112e+09	1.50346e+09	1.1669e+09	1213074396	1.29877e+09	1.23893e+09	1.48005e+09	1.40366e+09	1.58648e+09	1.49545e+09	4954.49	4157.85	5567.33	5151.88	5153.3	4029.06	5732.22	5362.45	6028.97	5700.95	6223.46	6237.93	5530.95	6074.46	6198.57
Q9JLJ3	4-trimethylaminobutyraldehyde dehydrogenase OS=Rattus norvegicus GN=Aldh9a1 PE=1 SV=1 - [AL9A1_RAT]	53.618	3.95008e+08	4.582e+08	5.2167e+08	5.94865e+08	5.15208e+08	1.97794e+09	5.59283e+08	5.92353e+08	5.37248e+08	5.07211e+08	6.42632e+08	6.22404e+08	6.58641e+08	4.78392e+08	6.80116e+08	7.64026e+08	6.49284e+08	5.73725e+08	6.50396e+08	7.12531e+08	7.59976e+08	6.61389e+08	738094360	7.71663e+08	699441999	6.43045e+08	6.96554e+08	6.17224e+08	697658609	6.72078e+08	759647610	8.66879e+08	4948.85	4741.71	5282.94	4687.01	4908.88	4579.64	5888.07	4974.22	4597.37	4553.57	4716.65	5135.47	4593.93	4708.31	5178.76
P31044	Phosphatidylethanolamine-binding protein 1 OS=Rattus norvegicus GN=Pebp1 PE=1 SV=3 - [PEBP1_RAT]	20.7884	3.38651e+09	2.42232e+09	3.1946e+09	2.87944e+09	3.76518e+09	2.36022e+09	2.57428e+09	2.51952e+09	3.34403e+09	3.66715e+09	2.78372e+09	3151555710	3.67584e+09	3.53852e+09	3.0434e+09	3906967382	4.19705e+09	4.4745e+09	3.69866e+09	3.94015e+09	4.58525e+09	3905873439	3.89104e+09	3597894316	3.62625e+09	4.10534e+09	3.72315e+09	3.41425e+09	4514007983	4.70713e+09	3.60391e+09	3735056613	4942.76	3245.83	4532.45	3554.73	4589.33	3177.36	4211.93	4257.76	3859.57	4067.22	3518.22	3828.43	3978.17	3597.46	3372.1
P51635	Alcohol dehydrogenase [NADP(+)] OS=Rattus norvegicus GN=Akr1a1 PE=1 SV=2 - [AK1A1_RAT]	36.4829	9.9676e+08	8.41024e+08	1.06437e+09	9.49151e+08	1.01104e+09	7.69085e+08	1.04408e+09	1077884402	1.0612e+09	1.17975e+09	1.27598e+09	1.2695e+09	1.04565e+09	1106749447	1.28772e+09	1.40605e+09	1.32765e+09	1.2186e+09	1.23075e+09	1.16098e+09	1.2087e+09	1.10184e+09	1.30717e+09	1.32725e+09	1.07788e+09	1120959945	1.16717e+09	1.1603e+09	1.19291e+09	1.27161e+09	1.26289e+09	1179186666	4939.53	3828.59	4965.45	4286.91	5123.6	4305.65	5564.25	5020.22	5061.18	4696.05	5064.1	5055.91	5518.6	5266.54	5509.77
P13383	Nucleolin OS=Rattus norvegicus GN=Ncl PE=1 SV=3 - [NUCL_RAT]	77.101	5.78249e+08	506037373	6.48981e+08	640508844	7.69217e+08	608714893	6.41332e+08	6.52196e+08	8.10322e+08	7.52814e+08	753132151	8.54095e+08	8.81535e+08	8.04761e+08	8.76687e+08	1047140146	1.01389e+09	9.10783e+08	1.00777e+09	1.01076e+09	1.23613e+09	9.71753e+08	1.18873e+09	1.20974e+09	8.16029e+08	8.84126e+08	8.78853e+08	7.9982e+08	1.09253e+09	1.03961e+09	1.00267e+09	1.00857e+09	4815.16	4302.8	4458	4252.33	4408.56	3691.13	4211.51	4856.8	4680.39	5054.23	4599.84	5019.72	4898.88	4669.76	4172.13
P09006	Serine protease inhibitor A3N OS=Rattus norvegicus OX=10116 GN=Serpina3n PE=1 SV=3 - [SPA3N_RAT]	46.6223	3.85475e+08	3.59179e+08	4.59737e+08	4.70145e+08	4.53629e+08	497540693	4.99919e+08	4.48735e+08	8.42315e+08	7.92867e+08	8.68631e+08	8.9232e+08	9.10921e+08	9.33666e+08	1.05348e+09	1.1769e+09	1061618494	9.36658e+08	1.03554e+09	9.82386e+08	1.18836e+09	9.47946e+08	1.20609e+09	1.30867e+09	7.95104e+08	9.56769e+08	8.78592e+08	9.61033e+08	1.18821e+09	1.05254e+09	1.16805e+09	1.12537e+09	4811.82	3977.19	4700.65	4498.51	4513.9	4608.3	4663	4379.84	6090.76	6098.28	6625.15	6355.51	6303.79	6197.4	6810.57
P02650	Apolipoprotein E OS=Rattus norvegicus GN=Apoe PE=1 SV=2 - [APOE_RAT]	35.7313	9.89667e+08	1.51209e+09	1.32659e+09	1.61752e+09	1.22964e+09	1.67006e+09	1.22374e+09	1.28618e+09	2.73439e+09	2.4972e+09	2.87507e+09	2.84567e+09	2.95938e+09	2.75034e+09	2.97989e+09	3.4659e+09	2.89614e+09	2.40576e+09	3.23651e+09	3.29133e+09	3.5209e+09	3.27638e+09	3.76089e+09	3.67429e+09	2.59234e+09	2.66833e+09	3.00574e+09	3042088986	2.99682e+09	3.03933e+09	3.3211e+09	3342990482	4802.03	5913.74	5139.12	6027.53	5380.2	6070.59	5699.43	5434.82	7028.03	6858.87	7270.11	7112.24	8089.94	6823.98	7714.82
Q6P6V0	Glucose-6-phosphate isomerase OS=Rattus norvegicus GN=Gpi PE=1 SV=1 - [G6PI_RAT]	62.7871	5.51929e+08	6.98083e+08	7.27254e+08	8.94156e+08	7.15242e+08	1032220028	7.8794e+08	7.51061e+08	9.11161e+08	7.20638e+08	9.35392e+08	9.23169e+08	1.13076e+09	8.97194e+08	1.23493e+09	1.55941e+09	966962081	688787735	1.25895e+09	1.22792e+09	1.35502e+09	1.04803e+09	1.48515e+09	1.53602e+09	9.21384e+08	1.05096e+09	9.30739e+08	1.03261e+09	1.25881e+09	1.08958e+09	1.46745e+09	1.47691e+09	4740.23	5713.41	5484.02	5991.77	5100.78	5934.13	6151.4	5806.05	5346.81	5765.7	5716.27	5735.31	5613.97	5249.48	5563.71
P31000	Vimentin OS=Rattus norvegicus GN=Vim PE=1 SV=2 - [VIME_RAT]	53.7	6.58273e+08	4.53132e+08	7.61319e+08	6.3683e+08	7.03194e+08	3.92156e+08	5.443e+08	8.73925e+08	1.3363e+09	1.29012e+09	1.19933e+09	1387368286	1.28088e+09	9.70682e+08	1603246993	1.83368e+09	2.09266e+09	1.73576e+09	2.09937e+09	2.16692e+09	2.22988e+09	2.1345e+09	2.8707e+09	2.34959e+09	1.04152e+09	1098072402	1.29098e+09	1014356187	1.0268e+09	1.47712e+09	1.14633e+09	1.28329e+09	4733.15	2979.31	3603.54	3863.19	3735.14	2916.57	2678.98	3901.91	5119.06	5787.78	5403.8	6071.08	5321.04	5359.54	5848.97
P02696	Retinol-binding protein 1 OS=Rattus norvegicus GN=Rbp1 PE=1 SV=2 - [RET1_RAT]	15.8238	1.58751e+09	1.25152e+09	1.82025e+09	1.53535e+09	1.91029e+09	1.27484e+09	1.9619e+09	1.8873e+09	1.79855e+09	1.84689e+09	1.88052e+09	2.09111e+09	1.89905e+09	1.7443e+09	2.18782e+09	2.39389e+09	2.13908e+09	2057562573	2.19911e+09	2.19656e+09	2.19333e+09	1.99652e+09	2.57011e+09	2.25063e+09	1.95282e+09	2.03057e+09	2.30903e+09	2121378543	2.37391e+09	2.34861e+09	2.29995e+09	2.14357e+09	4716.99	3460.42	4906.08	3617.85	4061.68	2699.86	4550.05	4351.7	4329.81	4641.15	4221.13	4607.09	4056.23	3705.32	4096.57
P30349	Leukotriene A-4 hydrolase OS=Rattus norvegicus GN=Lta4h PE=2 SV=2 - [LKHA4_RAT]	69.1321	3.54966e+08	3.46626e+08	4.17486e+08	5.1568e+08	3.75463e+08	4.24355e+08	4.62718e+08	417293365	3.75997e+08	3.57334e+08	3.43594e+08	463338936	4.28274e+08	4.14421e+08	4.52964e+08	5.21215e+08	4.76678e+08	4.53185e+08	500301546	5.32733e+08	5.32899e+08	4.64449e+08	5.6698e+08	5.98859e+08	4.79645e+08	5.14959e+08	5.40322e+08	468469903	6.16516e+08	5.98749e+08	6.07849e+08	5.73113e+08	4710.55	3764.14	5620.87	4673.37	4375.2	3707.62	5763.53	5147.28	3375.13	3800.08	3377.23	4171.73	3196.89	3028.33	4213.15
Q62952	Dihydropyrimidinase-related protein 3 OS=Rattus norvegicus GN=Dpysl3 PE=1 SV=2 - [DPYL3_RAT]	61.928	9.86246e+08	1.07119e+09	1.23432e+09	1.27338e+09	1128703098	1406845059	1.31294e+09	1.43436e+09	1.23108e+09	1.09776e+09	1.29868e+09	1.24351e+09	1.22681e+09	1202196865	1.50729e+09	1.53289e+09	1.30808e+09	1.08194e+09	1.43792e+09	1.23642e+09	1.62456e+09	1494366927	1.76917e+09	1.89481e+09	1.18332e+09	1.0812e+09	1.31211e+09	1.23392e+09	1.49731e+09	1461094824	1.6534e+09	1.37871e+09	4693.5	5169.14	5635.83	5384.49	5372.84	5801.93	5594.61	6218.27	3829.05	3426.8	3871.43	3651.99	4069.34	3746.69	4154.82
P36972	Adenine phosphoribosyltransferase OS=Rattus norvegicus GN=Aprt PE=1 SV=1 - [APT_RAT]	19.5334	7.01242e+08	7.53461e+08	8.07744e+08	1.01299e+09	7.28233e+08	1.08304e+09	7.87366e+08	7.48464e+08	1.4349e+09	1.21013e+09	1.47401e+09	1.34365e+09	1.43437e+09	1.34707e+09	2.01659e+09	2.45507e+09	1.73009e+09	1.38216e+09	1.8551e+09	1.81488e+09	2.0117e+09	1.344e+09	2.32056e+09	2.21851e+09	1.21814e+09	1.33195e+09	1.30969e+09	1.40645e+09	1.82746e+09	1.69329e+09	1.77377e+09	1.76859e+09	4681.4	4770.67	4899.57	4698.11	4247.39	4513.83	4827.72	4520.96	5265.38	5293.39	5567.9	5118.75	5975.1	6080.05	6231.22
O35814	Stress-induced-phosphoprotein 1 OS=Rattus norvegicus GN=Stip1 PE=1 SV=1 - [STIP1_RAT]	62.5304	5.55047e+08	4.44746e+08	6.26124e+08	5.50183e+08	6.16386e+08	4.378e+08	5.05497e+08	5.40183e+08	7.12084e+08	6.92119e+08	6.43439e+08	7.49885e+08	7.00854e+08	6.82392e+08	7.08224e+08	8.04101e+08	7.89174e+08	7.59405e+08	6.98134e+08	7.71986e+08	8.07734e+08	6.75802e+08	7.63604e+08	6.97822e+08	673975511	7.89406e+08	7.09508e+08	6.4065e+08	782054944	8.16692e+08	782051216	7.15563e+08	4675.92	3667.37	4388.55	3914.22	3987.09	3130.02	3708.44	4284.65	4015.84	4377.12	4043.19	4393.51	3704.96	3530.98	3716.83
Q63495	Advanced glycosylation end product-specific receptor OS=Rattus norvegicus GN=Ager PE=1 SV=1 - [RAGE_RAT]	42.6372	4.71615e+09	5.50048e+09	5.41319e+09	6.21057e+09	5.66874e+09	6.48746e+09	5.47712e+09	5.63771e+09	5.30697e+09	4.96801e+09	5.32373e+09	5.49899e+09	5.60892e+09	5.27541e+09	5.9143e+09	6.76512e+09	6.47405e+09	5965052475	6.89382e+09	6.33772e+09	7.50702e+09	6.55114e+09	7.36594e+09	7.70021e+09	6.18778e+09	6.76417e+09	6.82694e+09	6998887187	7.62728e+09	7.45087e+09	8.10679e+09	7534703775	4659.21	4912.36	5044.23	5100.41	4921.81	5758.68	4693.94	5250.8	4377.13	4018.97	4281.33	4251.54	4301.69	4511.17	4526.12
P45592	Cofilin-1 OS=Rattus norvegicus GN=Cfl1 PE=1 SV=3 - [COF1_RAT]	18.5207	1.97394e+09	1.85201e+09	1.89301e+09	1.92875e+09	2.14807e+09	1.3801e+09	1.11763e+09	1.79191e+09	3.33239e+09	3.18032e+09	2.80999e+09	2.95672e+09	2.74374e+09	2.01942e+09	2.87955e+09	3.71812e+09	4.46446e+09	2.98024e+09	3142476667	3.5181e+09	3.35541e+09	2.98111e+09	4.3179e+09	3.32597e+09	3.19736e+09	3.54224e+09	3.13444e+09	2.35582e+09	2.58766e+09	3.12057e+09	2.73777e+09	2.76434e+09	4640.01	4329.64	4986.86	4532.79	4483.56	3707.75	3774.95	4765.37	5144.94	5388.21	5204.65	5733.67	4847.91	4318.33	4882.59
P55053	Fatty acid-binding protein, epidermal OS=Rattus norvegicus GN=Fabp5 PE=1 SV=3 - [FABP5_RAT]	15.0495	9.20212e+08	7.66576e+08	1149207493	1029919484	1.13614e+09	8.27509e+08	1.37416e+09	1322321742	1.00125e+09	1.12362e+09	1.14272e+09	1.12894e+09	1.09259e+09	1.098e+09	1.55516e+09	1.52575e+09	1.29555e+09	1.18315e+09	1.26048e+09	1.26987e+09	1.46186e+09	1.40134e+09	1.81826e+09	1.60314e+09	1019343436	1.12269e+09	1.09304e+09	1.24609e+09	1476678602	1.20285e+09	1.45822e+09	1.34863e+09	4615.45	2610.67	4027.58	3428.95	3961.54	2669.41	3582.85	3956.03	3550.08	3736.04	3722.26	3484.83	2935.42	2852.39	3225.9
P85845	Fascin OS=Rattus norvegicus GN=Fscn1 PE=1 SV=2 - [FSCN1_RAT]	54.4569	5.9489e+08	5.22237e+08	6.83293e+08	7.39627e+08	7.14663e+08	7.68843e+08	7.47569e+08	6.74516e+08	463517470	4.49699e+08	4.86555e+08	474357380	4.94102e+08	4.89747e+08	5.55841e+08	627951704	522350425	4.69997e+08	5.62348e+08	5.08148e+08	6.51982e+08	5.15779e+08	630378775	6.72787e+08	4.8061e+08	5.83127e+08	5.38582e+08	4.90223e+08	6.62678e+08	6.25396e+08	7.0338e+08	6.72354e+08	4613.08	3439.17	4673.54	3622.46	4352.53	3603.51	5059.61	5196.92	2746.46	2887.43	2817.12	2689.66	2662.13	2553.77	2613.75
Q9EPH8	Polyadenylate-binding protein 1 OS=Rattus norvegicus GN=Pabpc1 PE=1 SV=1 - [PABP1_RAT]	70.6559	5.4282e+08	5.21352e+08	6.95845e+08	6.81147e+08	6.13938e+08	6.34811e+08	7.06414e+08	664377605	7.52079e+08	8.10457e+08	7.64274e+08	9.39617e+08	8.33493e+08	8.21537e+08	9.56829e+08	1.1118e+09	8.67987e+08	8.85558e+08	9.2905e+08	9.61645e+08	1.09028e+09	9.37696e+08	1.11755e+09	1.18763e+09	7.61738e+08	8.98817e+08	9.29179e+08	9.16869e+08	1.10698e+09	1.0698e+09	1.15197e+09	1154252584	4608.33	3824.11	4660.79	4758.13	4352.25	3964.69	4706.89	4262.77	4533.39	4596.31	5036.95	5324.57	4479.83	4285.46	5230.15
P62963	Profilin-1 OS=Rattus norvegicus GN=Pfn1 PE=1 SV=2 - [PROF1_RAT]	14.9475	5.03712e+09	3.555e+09	5.1048e+09	4.65397e+09	5.24644e+09	4.83469e+09	5.5491e+09	4.7964e+09	6.09971e+09	4986462304	6.8995e+09	6.34477e+09	5.97922e+09	5.87118e+09	6.34035e+09	7.11811e+09	7.39581e+09	5887265679	6.05741e+09	6.16858e+09	7.09199e+09	6.18141e+09	7.6661e+09	7.89671e+09	6.72124e+09	6.91868e+09	6.20479e+09	6.66568e+09	7867371187	6.76891e+09	7.39783e+09	6.09665e+09	4588.81	4533.51	5271.69	5055.18	6221.9	5395.93	5580.45	6412.69	5632.06	6222.69	7038.55	6431.62	6430.11	6892	6992.9
Q9QX79	Fetuin-B OS=Rattus norvegicus OX=10116 GN=Fetub PE=2 SV=2 - [FETUB_RAT]	41.5359	6.8942e+08	4.81789e+08	7.16228e+08	1.33075e+09	7.2988e+08	1.17463e+09	1.36189e+09	6.60746e+08	1.25461e+09	1.81497e+09	1.31139e+09	2.32275e+09	1.29018e+09	1.25567e+09	2.65018e+09	2.26763e+09	1.49274e+09	1.38511e+09	2.33386e+09	1.23964e+09	2.28024e+09	1.22308e+09	2.45389e+09	2.36176e+09	1.39776e+09	2.32981e+09	1.45218e+09	1.82528e+09	1.89236e+09	2.56739e+09	2.48029e+09	2.87999e+09	4542.39	3211.92	4418.95	3769.65	3426.14	3503.19	4290.72	4233.03	5483.75	5397.58	5132.62	5031.32	4932.47	5220.38	5248.66
P11762	Galectin-1 OS=Rattus norvegicus GN=Lgals1 PE=1 SV=2 - [LEG1_RAT]	14.8472	2.28026e+09	1799308909	2.22587e+09	2.21959e+09	2.6124e+09	2.24029e+09	2.30724e+09	2.48251e+09	2463416078	2.27838e+09	2.51254e+09	2.57468e+09	2.58614e+09	2.56449e+09	2.74549e+09	2.96464e+09	3.14418e+09	2.84261e+09	3.01315e+09	2.97932e+09	3.94689e+09	3.42464e+09	3.81435e+09	3.64711e+09	2.25883e+09	2.48255e+09	2.55263e+09	2.57838e+09	3.14578e+09	3.39275e+09	2.90791e+09	3.04095e+09	4498.71	4329.43	4245.33	3910.64	5065.9	4781.59	4980.29	5088.65	4210.94	4860.18	4442.88	4078.01	5072.88	4827.34	4928.21
Q07009	Calpain-2 catalytic subunit OS=Rattus norvegicus GN=Capn2 PE=1 SV=3 - [CAN2_RAT]	79.8688	1.90298e+08	2.14644e+08	244845647	2.87347e+08	2.45503e+08	2.96963e+08	2.73346e+08	2.79712e+08	2.23528e+08	1.82014e+08	2.02383e+08	2.13235e+08	236152869	2.00314e+08	2.52712e+08	2.89454e+08	223352351	2.14881e+08	2.58134e+08	2.50624e+08	3.04608e+08	2.25982e+08	3.34514e+08	2.91373e+08	267957015	3.2465e+08	3.2007e+08	2.84484e+08	3.70055e+08	3.44464e+08	3.80085e+08	3.60948e+08	4488.17	4320.48	5074.12	5803.38	5056.93	5360.83	6146.75	5568.5	3607.19	3946.58	3534.29	3984.32	4217.73	3938.27	4422.49
Q63270	Cytoplasmic aconitate hydratase OS=Rattus norvegicus GN=Aco1 PE=1 SV=1 - [ACOC_RAT]	98.0653	4.41222e+08	3.68879e+08	5.69167e+08	5.14645e+08	4.49838e+08	4.06252e+08	4.49733e+08	5.00363e+08	3.16458e+08	2.53497e+08	245977163	2.76678e+08	2.29659e+08	326937955	2.56068e+08	2.68217e+08	273662667	2.58792e+08	3.25554e+08	2.47453e+08	2.6178e+08	2.60316e+08	304824618	2.69643e+08	3.03326e+08	230153300	2.61404e+08	2.33582e+08	2.78013e+08	2.36452e+08	2.64035e+08	2.41235e+08	4465.83	3905.63	4546.64	4301.81	3938.89	3147.07	4713.45	4721.29	66.068	65.9067	123.261	97.5808	68.2061	90.9441	148.79
Q5M7W5	Microtubule-associated protein 4 OS=Rattus norvegicus GN=Map4 PE=1 SV=1 - [MAP4_RAT]	110.233	2.89398e+08	2.23133e+08	1.58634e+08	1.69352e+08	2.25716e+08	2.1805e+08	1.33046e+08	161213370	2.69721e+08	2.37472e+08	1.56658e+08	1.52833e+08	2.3078e+08	2.21361e+08	1.31787e+08	151023505	3.60579e+08	3.1673e+08	2.07317e+08	2.04878e+08	3.23893e+08	2.8273e+08	2.42777e+08	2.05241e+08	2.06907e+08	2.10985e+08	1.21365e+08	1.35711e+08	2.16524e+08	2.28809e+08	1.16579e+08	1.3551e+08	4431.03	3166.07	3113.53	2821.55	3274.55	2974.12	2188.44	2584.08	3261.83	3047.1	1717.61	1745.29	2531.44	2290.42	1669.96
P04797	Glyceraldehyde-3-phosphate dehydrogenase OS=Rattus norvegicus GN=Gapdh PE=1 SV=3 - [G3P_RAT]	35.8052	5.61664e+08	1.38765e+09	8.49894e+08	1.43123e+09	6.36387e+08	2.01988e+09	6.91558e+08	7.38447e+08	2.24518e+09	2.06985e+09	2.04494e+09	2.13648e+09	2.70335e+09	2.53128e+09	2.21962e+09	2.86685e+09	2.84766e+09	2466374601	3.65869e+09	3.51096e+09	4.09621e+09	3.57852e+09	3.54168e+09	4.15556e+09	2.65767e+09	3.04005e+09	2.62636e+09	2.50278e+09	2623206116	3133372626	3.78445e+09	3.6825e+09	4416.17	5582.8	4972.08	5535.43	3810.06	6225.9	4409.02	4538.71	6795.97	6539.02	6337.97	6275.13	7056.23	7267.38	6245.73
P56574	Isocitrate dehydrogenase [NADP], mitochondrial OS=Rattus norvegicus GN=Idh2 PE=1 SV=2 - [IDHP_RAT]	50.9349	5.39554e+08	7.24687e+08	7.45892e+08	870830940	684362602	9.04372e+08	6.64126e+08	5.39088e+08	9.25972e+08	7.41459e+08	1002048314	9.76272e+08	1.12585e+09	9.84149e+08	1.0433e+09	1.41197e+09	1046166986	7.2729e+08	1.18669e+09	1.34619e+09	1.41309e+09	1.19068e+09	1.39018e+09	1.31199e+09	1.34464e+09	1.45667e+09	1.29678e+09	1500700084	1.4591e+09	1438674759	1.86639e+09	1.84421e+09	4396.64	4182.46	4918.04	4225.57	4437.96	4217.37	4266.53	3384.16	4496.01	4478.5	4583.58	4690.7	5545.44	4966.31	4775.09
P00787	Cathepsin B OS=Rattus norvegicus GN=Ctsb PE=1 SV=2 - [CATB_RAT]	37.4456	4.59876e+08	3.95083e+08	5.67331e+08	470823694	5.12481e+08	4.13191e+08	6.7599e+08	4.69112e+08	6.4524e+08	5.37887e+08	5.92846e+08	5.22933e+08	6.11096e+08	5.10269e+08	6.51053e+08	6.45269e+08	7.17101e+08	597848510	6.68325e+08	632043458	7.2132e+08	5.43969e+08	7.30329e+08	7.95347e+08	6.0524e+08	574386728	5.44002e+08	6.02008e+08	6.14034e+08	7.93736e+08	8.09245e+08	6.28491e+08	4383.47	3589.22	4817.6	3670.71	3945.48	3230.87	4443.23	3833.85	4103.05	4075.99	4587.27	4488.51	4041.16	3629.39	4252.04
P48721	Stress-70 protein, mitochondrial OS=Rattus norvegicus GN=Hspa9 PE=1 SV=3 - [GRP75_RAT]	73.8119	2.71808e+08	2.74333e+08	294055970	3.31667e+08	3.12429e+08	3.28792e+08	3.14836e+08	2.93667e+08	4.41344e+08	4.87015e+08	4.66944e+08	5.38904e+08	5.28711e+08	5.35399e+08	542117728	6.93064e+08	5.97117e+08	5.80674e+08	5.77136e+08	6.91576e+08	7.30113e+08	6.21628e+08	8.13545e+08	7.84414e+08	589930730	6.16543e+08	6.88151e+08	7.04124e+08	7.14134e+08	7.46066e+08	8.00747e+08	7.81968e+08	4371.2	3038.25	4295.86	3508.34	2989.17	2931.15	4479.53	4011.61	4795.23	5190.14	4855.73	4957.75	4425.34	5026.6	4846.58
P85968	6-phosphogluconate dehydrogenase, decarboxylating OS=Rattus norvegicus GN=Pgd PE=1 SV=1 - [6PGD_RAT]	53.202	5.08444e+08	4.72547e+08	6.03642e+08	6.56949e+08	5.80723e+08	5.51209e+08	6.58948e+08	652964345	5.5324e+08	4.80243e+08	6.0803e+08	5.94695e+08	6.22207e+08	560050748	7.82987e+08	8.79041e+08	6.68445e+08	5.36066e+08	7.03179e+08	6.47053e+08	7.9049e+08	6.43286e+08	8.95146e+08	8.38866e+08	6.51698e+08	7.09705e+08	7.37279e+08	7.09295e+08	8.97543e+08	8.4776e+08	8.85683e+08	8.0271e+08	4346.22	4050.8	4940.14	4171.31	4388.77	4011.71	4815.05	4432.37	4149.31	4365.8	4248.88	4318.33	4495.97	4096.93	4669.24
P52296	Importin subunit beta-1 OS=Rattus norvegicus GN=Kpnb1 PE=1 SV=1 - [IMB1_RAT]	97.062	5.08658e+08	3.46038e+08	3.96466e+08	7.94684e+08	4.17965e+08	7.34182e+08	3.56277e+08	3.63999e+08	3.39556e+08	2.94676e+08	3.19949e+08	3.96789e+08	4.22218e+08	3.78546e+08	5.10814e+08	6.52411e+08	4.30239e+08	4.02617e+08	4.40577e+08	5.37042e+08	5.13727e+08	4.49292e+08	5.8368e+08	6.1878e+08	4.17321e+08	9.55731e+08	4.64137e+08	4.53251e+08	634508515	5.62276e+08	6.76435e+08	6.22439e+08	4336.62	4071.19	5115.39	5153	2200.07	4692.7	5920	5878.93	2916.58	3759.18	3032.07	3513.23	3352.63	3589.65	4151.64
P04762	Catalase OS=Rattus norvegicus GN=Cat PE=1 SV=3 - [CATA_RAT]	59.7195	5.3401e+08	1.37653e+09	865303756	1.47151e+09	1.1789e+09	1.68788e+09	7.71993e+08	4.69875e+08	1.64499e+09	1.23893e+09	1.7779e+09	1.50365e+09	2.09771e+09	1.52137e+09	1.87953e+09	2317913420	1.88527e+09	9.74222e+08	2.17212e+09	2.21387e+09	2.3405e+09	2.19794e+09	2348464293	2.29875e+09	2.04369e+09	2.07771e+09	1.93078e+09	2.01884e+09	1.77787e+09	1.93036e+09	2.77406e+09	2.67409e+09	4318.96	7251.59	5842.94	6157.56	6492.61	7706.71	5132.82	4030.5	7300.87	6190.82	7534.09	6987.89	7779.57	6561.69	6801.99
P41562	Isocitrate dehydrogenase [NADP] cytoplasmic OS=Rattus norvegicus GN=Idh1 PE=1 SV=1 - [IDHC_RAT]	46.7045	5.23308e+08	5.55233e+08	5.96013e+08	6.68112e+08	6.31434e+08	6.47428e+08	6.48003e+08	5.2903e+08	5.31503e+08	4.7028e+08	6.10897e+08	5.95777e+08	6.15958e+08	5.50538e+08	6.22655e+08	7.96633e+08	6.75825e+08	5.6431e+08	7.32368e+08	7.01308e+08	8.76756e+08	7.06742e+08	8.08985e+08	7.84456e+08	7.4159e+08	8.25451e+08	7.66694e+08	775375286	9.29539e+08	8.73359e+08	939083706	9.81928e+08	4276.94	3862.14	5130.09	4249.62	4403.41	3450.12	4747.32	5050.42	3458.89	3282.41	3200.34	3673.01	2873.96	2981.27	3858.52
Q6AXQ0	SUMO-activating enzyme subunit 1 OS=Rattus norvegicus GN=Sae1 PE=2 SV=1 - [SAE1_RAT]	38.4885	3.48191e+08	3.03922e+08	3.71348e+08	4.54545e+08	3.87002e+08	3.95362e+08	4.13902e+08	4.0386e+08	436969873	3.4075e+08	4.66716e+08	413207034	4.21442e+08	3.84475e+08	5.12926e+08	6.06628e+08	4.46921e+08	2.83709e+08	4.64674e+08	5.06041e+08	4.86025e+08	3.95396e+08	5.92903e+08	4.97429e+08	3.50314e+08	3.94764e+08	4.0827e+08	4.65621e+08	5.35517e+08	4.12088e+08	5.60061e+08	2.0388e+09	4272.68	3333.47	4225.54	4047.19	4108.02	3363.61	4819.81	4797.7	2858.66	3260.98	3076.93	3004.04	2886.42	2826.67	3408.34
P14740	Dipeptidyl peptidase 4 OS=Rattus norvegicus OX=10116 GN=Dpp4 PE=1 SV=2 - [DPP4_RAT]	88.0326	248357884	2.43403e+08	282245463	3.14408e+08	3.09706e+08	3.09124e+08	332206124	2.53518e+08	7.40435e+07	8.48248e+07	9.42317e+07	6.39401e+07	1.06314e+08	9.13248e+07	9.77085e+07	1.05352e+08	8.24964e+07	6.63387e+07	1.27863e+08	1.12167e+08	1.31884e+08	1.04142e+08	1.11202e+08	1.23743e+08	9.65189e+07	1.0856e+08	1.03824e+08	1.20877e+08	1.10463e+08	1.06861e+08	140081874	1.45687e+08	4266.6	3385.98	4307.8	3883.92	3694.78	2944.2	4569.13	4136.62	850.501	891.35	1107.39	684.058	1263.9	1120.35	1293.51
P58775	Tropomyosin beta chain OS=Rattus norvegicus GN=Tpm2 PE=3 SV=1 - [TPM2_RAT]	32.8166	4.38328e+09	2.90785e+09	2.75264e+09	2.89726e+09	3.32942e+09	2.0708e+09	1.33924e+09	2.53056e+09	5.43916e+09	4.67106e+09	3.40601e+09	3.97383e+09	3555158157	2.69282e+09	3.26631e+09	3.98471e+09	6.2171e+09	4.7573e+09	2.66029e+09	3929186889	4.07598e+09	3.05473e+09	5.14926e+09	2.73704e+09	4.38499e+09	4.29213e+09	3868181765	2.81068e+09	3.36937e+09	4.41536e+09	2.46283e+09	3.24754e+09	4191.45	2786.7	3119.47	2649	3157.09	2007.12	2132.63	3062.28	3360.46	3483.81	2660.02	3084.47	2810.48	2550.41	2715.85
P51886	Lumican OS=Rattus norvegicus GN=Lum PE=1 SV=1 - [LUM_RAT]	38.2546	9.2995e+08	8.83832e+08	9.70469e+08	9.68887e+08	1.15211e+09	8.65632e+08	1.02786e+09	8.96121e+08	1.05547e+09	9.62431e+08	1.10442e+09	1.1171e+09	1.16383e+09	844626452	1.34286e+09	1.56136e+09	1.27464e+09	1.12978e+09	1.20778e+09	1.06946e+09	1277557870	9.53901e+08	1503960068	1257346739	1.0771e+09	1.11639e+09	1.21528e+09	1.11265e+09	1369073863	1.30109e+09	1.27494e+09	1.29049e+09	4184.23	3435.88	4345.39	4092.36	4127.79	3305.18	4177.51	4013.24	3853.62	3387.23	3354.28	3509.34	3025.31	2970.67	3337.28
P19804	Nucleoside diphosphate kinase B OS=Rattus norvegicus GN=Nme2 PE=1 SV=1 - [NDKB_RAT]	17.2719	1.63541e+09	1.7257e+09	1.95593e+09	2.11993e+09	2.47267e+09	1.86736e+09	2.65013e+09	2.50513e+09	3.13295e+09	2.91405e+09	3.98914e+09	3.53258e+09	3988906185	3.22821e+09	4.60834e+09	4.13655e+09	3.84729e+09	3.14816e+09	4221581590	4.15246e+09	4.98697e+09	4.70371e+09	5568296150	5.26376e+09	3.34437e+09	3.39304e+09	4.10512e+09	3.82287e+09	4536505600	4.70471e+09	5.0279e+09	4.55253e+09	4156.25	3766.25	4239.24	3899.09	4147.48	3660.76	3834.22	4025.44	4444.57	4186.13	4490.81	4693.9	4943.66	4613.03	4949.43
Q07439	Heat shock 70 kDa protein 1A/1B OS=Rattus norvegicus GN=Hspa1a PE=2 SV=2 - [HSP71_RAT]	70.1421	3679243906	3.26426e+09	4.27707e+09	4.19669e+09	3.93869e+09	4.13479e+09	5.11072e+09	5.0995e+09	4.15879e+09	3.66385e+09	4.97948e+09	4.48735e+09	4.4593e+09	4.38983e+09	5.79033e+09	5.92365e+09	5.06473e+09	4.61394e+09	5.38747e+09	4.44763e+09	5.16065e+09	4.89513e+09	5.72886e+09	6.39072e+09	4.43311e+09	4.55463e+09	5.63662e+09	5.54787e+09	6.09731e+09	6.20909e+09	6.52876e+09	5.69491e+09	4153.52	3889.62	4701.93	4083.38	3902.22	3565.36	4414.58	4099.24	4894.54	4713.85	4363.38	4719.92	4284.72	4730.95	4717.98
P46462	Transitional endoplasmic reticulum ATPase OS=Rattus norvegicus GN=Vcp PE=1 SV=3 - [TERA_RAT]	89.2927	1.76936e+08	7.86634e+08	4.61389e+08	965327630	7.83774e+08	1.10357e+09	3.34167e+08	2.4905e+08	1.15455e+09	9.21782e+08	1130656934	1.20344e+09	1.17694e+09	1.07625e+09	1.42522e+09	1.69141e+09	1.45784e+09	1.1432e+09	1.36087e+09	1.51017e+09	1.52969e+09	1.22304e+09	1.73894e+09	1.8097e+09	1.28207e+09	1.41236e+09	1.27999e+09	1.3447e+09	1719569088	1.45334e+09	1.5841e+09	1.55369e+09	4130.55	11503.3	7878.52	11672.8	10621.3	11806.1	6793.49	4299.83	13076.8	13678.8	12870.6	13452	12257.6	12777.1	13421.1
P36953	Afamin OS=Rattus norvegicus OX=10116 GN=Afm PE=3 SV=1 - [AFAM_RAT]	69.29	3.72613e+08	3.24495e+08	4.3717e+08	4.33697e+08	4.74505e+08	370393497	4.76269e+08	5.09014e+08	7.13721e+08	607797817	7.20711e+08	8.38043e+08	7.81002e+08	7.82469e+08	9.78034e+08	1.06636e+09	7.23103e+08	6.30309e+08	7.74051e+08	7.65121e+08	7.58984e+08	704500577	941250693	9.40204e+08	6.88252e+08	7.84701e+08	760325050	8.1433e+08	9.29844e+08	8.63885e+08	9.29064e+08	8.76226e+08	4101.64	3302.72	4737.89	3674.16	4088.2	3473.89	4940.75	4877.31	5151.88	5638.77	5425.68	5959.01	5506.78	5289.48	5653.83
Q9EQS0	Transaldolase OS=Rattus norvegicus GN=Taldo1 PE=1 SV=2 - [TALDO_RAT]	37.4365	1.19503e+09	7.8323e+08	1.32945e+09	1.14945e+09	1.28858e+09	9.6296e+08	1.59989e+09	1.30079e+09	1.05277e+09	9.73542e+08	1.36868e+09	1287387142	1.25847e+09	1068123563	1.79187e+09	1.65069e+09	1.21336e+09	1177572391	1.46031e+09	1.35133e+09	1.44819e+09	1.44677e+09	1881000525	2.05407e+09	1.07722e+09	1.10571e+09	1.45678e+09	1.41097e+09	1401107943	1.66964e+09	1.71299e+09	1.58229e+09	4098.82	3938.84	4829.13	4201.64	4420.91	3371.21	5213.7	4459.59	4071.93	4100.23	4224.46	4470.74	4435.01	4476.38	4845.65
P07943	Aldose reductase OS=Rattus norvegicus GN=Akr1b1 PE=1 SV=3 - [ALDR_RAT]	35.7743	1.3842e+09	1.20053e+09	1.65836e+09	1.67867e+09	1.62078e+09	1.48759e+09	1.83996e+09	1.62314e+09	1.99272e+09	1664999821	2134152668	2.21719e+09	1.85392e+09	2.11057e+09	2.50691e+09	2.66864e+09	2.17499e+09	2.21183e+09	2.07448e+09	2.09852e+09	2.0023e+09	1.81486e+09	2.39832e+09	2.52841e+09	1748009834	2.027e+09	2.08281e+09	2092313944	1.93418e+09	2.20662e+09	2.47885e+09	2.27509e+09	4076.24	3471.4	3999.29	3912.57	3902.92	3905.62	4642.3	4610.54	4192.17	4116.8	4104.13	4444.01	4200.93	4164.02	4555.44
P16638	ATP-citrate synthase OS=Rattus norvegicus GN=Acly PE=1 SV=1 - [ACLY_RAT]	120.559	1.45464e+08	1.75848e+08	2.16976e+08	2.41442e+08	1.52023e+08	2.58079e+08	1.87968e+08	2.01271e+08	1.66633e+08	1.40847e+08	1.6134e+08	190237621	2.30857e+08	2.00012e+08	2.1188e+08	254614608	224284463	1.42906e+08	2.14638e+08	2.15227e+08	2.53903e+08	2.05625e+08	2.83207e+08	2.83527e+08	2.38416e+08	2.7171e+08	2.43412e+08	2.31528e+08	3.10099e+08	262498607	3.232e+08	3.17807e+08	4031.3	4367.95	4673.71	5140.82	2995.53	4493.41	5483.99	4941.14	2967.94	2813.79	3037.54	3285.03	3201.63	3029.78	3320.66
P31232	Transgelin OS=Rattus norvegicus GN=Tagln PE=1 SV=2 - [TAGL_RAT]	22.5883	2.75353e+09	1.85778e+09	2.49124e+09	2.29249e+09	3.13904e+09	1.48259e+09	1.90174e+09	3.21616e+09	3.13814e+09	2.84519e+09	3.08412e+09	3.7847e+09	3.25893e+09	2.44867e+09	4.65341e+09	4.76916e+09	4.21767e+09	3.14756e+09	3184725618	4.07523e+09	3.33417e+09	2941060136	5.77185e+09	3.69005e+09	3.05754e+09	3.35808e+09	3899790951	3.04632e+09	3.18193e+09	3.95493e+09	3.22354e+09	3.46212e+09	4016.41	3008.21	4138.95	3770.97	4282.62	2155.5	3998.48	4639.19	3515.86	3769.63	3416.9	4010.98	3566.99	3381.02	4395.37
P42123	L-lactate dehydrogenase B chain OS=Rattus norvegicus GN=Ldhb PE=1 SV=2 - [LDHB_RAT]	36.5891	1.05055e+09	1.00353e+09	1.30801e+09	1.41464e+09	9.44767e+08	1.38029e+09	1.5544e+09	1.62706e+09	1.12689e+09	9.54072e+08	1.23288e+09	1.24036e+09	1.3398e+09	1.19158e+09	1.72896e+09	1.76652e+09	1235835586	9.0853e+08	1.54811e+09	1.43028e+09	1.58857e+09	1.489e+09	1.81109e+09	1.99398e+09	1.04569e+09	1.10665e+09	1495498598	1.32976e+09	1.35125e+09	1.65916e+09	1.90212e+09	1.66852e+09	3982.02	2828.08	4334.67	3821.09	3103.79	3140.91	4450.24	4244.07	2068.73	2163.25	2577.04	2458.57	2798.42	2788.71	2916.93
Q9WUW3	Complement factor I OS=Rattus norvegicus GN=Cfi PE=2 SV=1 - [CFAI_RAT]	67.2536	2.38153e+08	2.41379e+08	2.45742e+08	2.92828e+08	2.78157e+08	2.64383e+08	274997306	2.69198e+08	4.42792e+08	3.69787e+08	386516626	4.32322e+08	4.3551e+08	3.73703e+08	4.39488e+08	4.39776e+08	4.94787e+08	4.27414e+08	4.05979e+08	3.66106e+08	4.52189e+08	405351515	4.78473e+08	452570310	4.14088e+08	3.8668e+08	3.96893e+08	4.10412e+08	4.75842e+08	4.7281e+08	4.27836e+08	4.06663e+08	3953.75	2615.1	3753.95	3338.41	3732.8	2617.61	4391.61	5225.48	4547.65	4630.86	4497.67	4770.17	5211.96	4929.61	5092.47
Q920J4	Thioredoxin-like protein 1 OS=Rattus norvegicus GN=Txnl1 PE=1 SV=3 - [TXNL1_RAT]	32.2288	5.80914e+08	576069914	5.52022e+08	7.0508e+08	7.16089e+08	6.78638e+08	7.23655e+08	6.84579e+08	7.25326e+08	6.65218e+08	7.45203e+08	7.71254e+08	7.99292e+08	6.91168e+08	9.69471e+08	972742878	8.34504e+08	6.90961e+08	8.68205e+08	8.09458e+08	9.73508e+08	8.41217e+08	1.09303e+09	1.09558e+09	7.49259e+08	780793980	8.04882e+08	8.37837e+08	976195146	9.69278e+08	1.03074e+09	941523469	3925.63	3587.7	4439.69	4016.43	4205.65	3617.12	4166.01	4625.79	4232.85	4279.52	4112.66	3943.91	4113.44	3916.56	4654.51
P07323	Gamma-enolase OS=Rattus norvegicus GN=Eno2 PE=1 SV=2 - [ENOG_RAT]	47.1109	1.67395e+09	1.48746e+09	1.76353e+09	1.73114e+09	1.94642e+09	1.71888e+09	1.87657e+09	1.64272e+09	1.96894e+09	1.51737e+09	1.86437e+09	1.96828e+09	2.08191e+09	2.01675e+09	2.35868e+09	2.43036e+09	2.21195e+09	1.97281e+09	2.00318e+09	2135878163	2.32355e+09	1.75927e+09	2.56923e+09	2.54785e+09	1.79426e+09	1.95212e+09	1.82616e+09	1.7389e+09	2.31118e+09	2.06048e+09	2.37677e+09	2.06592e+09	3876.13	2947.93	4141.22	3568.31	3911.38	3286.56	4488.03	4459.12	3937.27	3669.82	4039.91	3598.18	3993.72	4344.73	4337.89
Q9QZA2	Programmed cell death 6-interacting protein OS=Rattus norvegicus GN=Pdcd6ip PE=1 SV=2 - [PDC6I_RAT]	96.5705	1.54194e+08	1.61792e+08	1.95048e+08	2.01031e+08	1.68281e+08	1.58484e+08	2.11926e+08	1.73853e+08	169429077	1.64505e+08	2.02454e+08	2.03124e+08	191456492	1.73168e+08	2.76305e+08	239030430	2.05903e+08	1.81017e+08	2.33398e+08	2.17851e+08	2.7e+08	1.84465e+08	291030433	2.16392e+08	2.03741e+08	2.24335e+08	2.14864e+08	229564240	2.42175e+08	250153185	2.77602e+08	236002923	3865.27	2877.6	4452.38	3735.65	3536.16	2711.59	4193.31	3859.65	3105.23	3180.53	3505.53	3603.33	2877.98	2632.74	3630.68
Q5HZV9	Protein phosphatase 1 regulatory subunit 7 OS=Rattus norvegicus GN=Ppp1r7 PE=1 SV=1 - [PP1R7_RAT]	41.2714	1.5703e+08	1.67249e+08	1.85392e+08	2.2596e+08	3.65039e+08	3.31788e+08	2.36904e+08	2.27427e+08	1.66936e+08	1.54324e+08	1.9147e+08	2.17099e+08	4.59546e+08	2.05612e+08	2.49423e+08	3.06662e+08	1.97875e+08	1.81968e+08	193294912	2.02165e+08	699448975	1.97819e+08	2.92446e+08	319952017	1.88294e+08	2.06609e+08	2.08673e+08	1.90357e+08	2.67746e+08	2.47047e+08	2.93426e+08	2.61335e+08	3855.48	3254.62	4296.77	3929.11	3781.96	3373.15	4485.79	4548.3	3050.64	3432.75	3343.31	3486.87	3437.21	3597.65	3647.4
P49911	Acidic leucine-rich nuclear phosphoprotein 32 family member A OS=Rattus norvegicus GN=Anp32a PE=2 SV=1 - [AN32A_RAT]	28.5473	8.24001e+08	4.97404e+08	6.41403e+08	6.10338e+08	741426932	4.84595e+08	3.35471e+08	6.53382e+08	6.22009e+08	5.6536e+08	4.72943e+08	6.49702e+08	4.87362e+08	4.84242e+08	5.42654e+08	7.53071e+08	8.09011e+08	6.57026e+08	4.9101e+08	6.44817e+08	5.78977e+08	5.03067e+08	8.34523e+08	6.1341e+08	5.99057e+08	6.98476e+08	6.97984e+08	4.75676e+08	556106802	7.79115e+08	4.9368e+08	6.6205e+08	3836.55	2621.1	3264.2	2405.42	2647.64	1890.45	1900.19	2610.64	2453.11	2466.02	2303.95	2495.83	1957.12	1658.84	2359.62
Q5RKI0	WD repeat-containing protein 1 OS=Rattus norvegicus GN=Wdr1 PE=1 SV=3 - [WDR1_RAT]	66.1399	2.94296e+08	3.97629e+08	3.87546e+08	4.43667e+08	3.44924e+08	5.14444e+08	3.96711e+08	3.00515e+08	3.96713e+08	3.66469e+08	3.99137e+08	4.02671e+08	4.8339e+08	3.87935e+08	413646777	497000165	4.64583e+08	3.10377e+08	5.45728e+08	5.0135e+08	6.40597e+08	5.03067e+08	6.102e+08	5.64905e+08	4.4742e+08	4.7283e+08	4.17542e+08	4.31511e+08	4.24927e+08	4.75382e+08	601147324	6.08432e+08	3768.14	4552.41	5510.61	5283.4	4019.14	4769.05	5042.14	4465.5	4066.18	3644.44	3984.71	3661.76	3983.76	3455.55	3625.57
Q6Q0N1	Cytosolic non-specific dipeptidase OS=Rattus norvegicus GN=Cndp2 PE=1 SV=1 - [CNDP2_RAT]	52.6596	4.86704e+08	4.19365e+08	5.07133e+08	5.80652e+08	5.08628e+08	5.40416e+08	5.97076e+08	5.21197e+08	5.59809e+08	5.11904e+08	5.80848e+08	7.94638e+08	5.93323e+08	5.37793e+08	8.00753e+08	7.67259e+08	1.16729e+09	9.15148e+08	7.78716e+08	6.76177e+08	7.73053e+08	6.40938e+08	8.7034e+08	836176970	9.84765e+08	1.07275e+09	9.42306e+08	5.86272e+08	7.33871e+08	9.43287e+08	8.19444e+08	7.82787e+08	3726.68	3666.17	5061.8	4237.26	4284.43	3773.66	5103.27	4786.58	3112.2	3695.35	3248.39	3834.96	3783.67	3383.34	3545.51
P02767	Transthyretin OS=Rattus norvegicus GN=Ttr PE=1 SV=1 - [TTHY_RAT]	15.7099	3.44462e+09	3.05928e+09	3.68875e+09	3.7261e+09	4.06759e+09	3.92758e+09	4.15708e+09	3.35033e+09	6.82075e+09	5.22704e+09	7.22297e+09	6.60802e+09	7.632e+09	7.61757e+09	9.2089e+09	8.89835e+09	6.81507e+09	6.01444e+09	6513533576	5.84394e+09	7.48332e+09	7.16567e+09	7.40048e+09	8876813215	5.84089e+09	5978143956	7.04321e+09	6.436e+09	8.18437e+09	7.79682e+09	8.36926e+09	7.89939e+09	3723.73	3121.15	3984.89	3789.04	2947.99	2869.81	3913.91	3183.94	4093.63	4074.63	3737.66	4134.29	3673.79	3572.1	4028.39
P01836	Ig kappa chain C region, A allele OS=Rattus norvegicus PE=1 SV=1 - [KACA_RAT]	11.7246	1972928616	2.77837e+09	2.60708e+09	3.08459e+09	3.03496e+09	2.8185e+09	2.84191e+09	2.41079e+09	3.44081e+09	2.83966e+09	3.99458e+09	3.8056e+09	3.97479e+09	3.26349e+09	3.78986e+09	3.87297e+09	3.39152e+09	2.24515e+09	3691368725	3.45899e+09	3.91709e+09	3.2312e+09	3.96313e+09	3.92739e+09	4565996584	4.142e+09	4.26312e+09	4.9797e+09	4.22105e+09	4.11064e+09	5.29663e+09	4.90159e+09	3711.97	4199.11	3877.38	3794.14	3194.67	4033.38	3989.41	3036.05	3833.32	4177.85	4409.84	4135.36	4215.14	4117.97	3756.07
Q63798	Proteasome activator complex subunit 2 OS=Rattus norvegicus GN=Psme2 PE=2 SV=3 - [PSME2_RAT]	26.84	2.45778e+08	4.08926e+08	3.66795e+08	5.52986e+08	3.73685e+08	556589504	3.95662e+08	4.06957e+08	5.11163e+08	4.10755e+08	4.73949e+08	541621469	5.32434e+08	4.88348e+08	5.88322e+08	6.66781e+08	5.35814e+08	3.67562e+08	6.15746e+08	6.45779e+08	6.81847e+08	5.22032e+08	6.51941e+08	7.31994e+08	4.95107e+08	5.42636e+08	4.66918e+08	4.73809e+08	5.69326e+08	5.44637e+08	6.46743e+08	6.30072e+08	3675.71	3900.78	3970.61	4288.12	3515.51	3424.62	4104.01	4289.36	3736.56	3624.05	3295.17	3950.11	4010.85	4219.66	3739.21
Q9JJ54	Heterogeneous nuclear ribonucleoprotein D0 OS=Rattus norvegicus GN=Hnrnpd PE=1 SV=2 - [HNRPD_RAT]	38.1942	2.60169e+09	2.47535e+09	2.78867e+09	3.053e+09	3.27072e+09	2.83285e+09	3.06742e+09	2.85537e+09	2.7108e+09	2.42386e+09	2.74698e+09	3.00938e+09	2.91292e+09	2.67134e+09	3.17814e+09	3.74797e+09	3.16066e+09	2.74909e+09	3.25538e+09	3.10119e+09	3604965989	3.0407e+09	3.71947e+09	3.67864e+09	2.37672e+09	2.47407e+09	2.51579e+09	2.55259e+09	3.08417e+09	2.94823e+09	3.15264e+09	3.12593e+09	3672.47	3728.53	3635.31	3836.81	2701.11	2522.31	3626.76	3021.27	3368.89	3378.14	3090.3	3322.39	2264.69	2653.48	2390.49
O35567	Bifunctional purine biosynthesis protein PURH OS=Rattus norvegicus GN=Atic PE=1 SV=2 - [PUR9_RAT]	64.1682	1.3845e+08	1.49089e+08	1.78766e+08	1.81563e+08	670957436	7.43739e+08	1.71563e+08	1.52263e+08	2.17226e+08	1.84387e+08	2.19515e+08	2.15933e+08	7.62452e+08	7.36519e+08	2.50437e+08	2.69309e+08	2.63993e+08	7.67087e+08	7.23639e+08	3.36946e+08	774237807	3.0431e+08	967282112	3.40891e+08	2.24853e+08	2.57624e+08	7.50263e+08	2.73683e+08	1142945976	1.04741e+09	3.01023e+08	3.75175e+08	3671.2	3523.07	4104.41	4044.44	3740.53	3879.38	4250.05	4230.58	4228.22	4762.48	4515.96	4770.21	4107.69	4268.58	4267.01
Q9EPT8	Chloride intracellular channel protein 5 OS=Rattus norvegicus OX=10116 GN=Clic5 PE=1 SV=1 - [CLIC5_RAT]	28.2814	4.07592e+08	5.00132e+08	5.02884e+08	5.80825e+08	438891750	4.90887e+08	4.08666e+08	4.53776e+08	723103193	7.12024e+08	6.71513e+08	789716390	7.00987e+08	5.86467e+08	693499368	9.18448e+08	8.52835e+08	6.49829e+08	9.39093e+08	8.7489e+08	7.95052e+08	7.49208e+08	8.15265e+08	8.29485e+08	778620424	7.27901e+08	718431803	7.69288e+08	6.67718e+08	7.36874e+08	7.4722e+08	7.51157e+08	3639.47	4194.62	4312.71	4383.04	4207.42	4084.62	3608.73	4227.41	4954.85	4214.64	4137.67	4654.45	4328.68	4018.8	4487.94
P18292	Prothrombin OS=Rattus norvegicus OX=10116 GN=F2 PE=1 SV=1 - [THRB_RAT]	70.3667	2.98727e+08	3.02649e+08	3.59397e+08	3.94309e+08	3.62792e+08	3.51661e+08	3.51263e+08	6.29334e+08	4.71692e+08	4.34469e+08	4.74579e+08	5.27984e+08	4.85867e+08	4.07026e+08	5.53822e+08	6.13416e+08	6.29387e+08	5.84741e+08	5.96331e+08	6.28524e+08	6.65197e+08	5.80468e+08	6.79528e+08	7.13393e+08	489216970	5.39157e+08	5.18176e+08	5.72839e+08	5.90492e+08	5.91854e+08	6.20006e+08	6.11836e+08	3588.74	3333.02	4625.12	3951.18	3639.84	3195.16	4262.8	4555.28	4664.26	4661.3	4564.83	5188.81	4466.1	4093.61	5141.83
Q5XI32	F-actin-capping protein subunit beta OS=Rattus norvegicus GN=Capzb PE=1 SV=1 - [CAPZB_RAT]	30.6094	5.69913e+08	6.96538e+08	6.91881e+08	6.83161e+08	6.57782e+08	8.26627e+08	7.31943e+08	6.84009e+08	7.34056e+08	7.62444e+08	859883559	7.50213e+08	8.14743e+08	8.95856e+08	9.78417e+08	8.10728e+08	9.56386e+08	8.228e+08	9.38106e+08	8.86562e+08	9.43084e+08	807664895	1.04661e+09	1.13666e+09	8.46174e+08	9.87668e+08	9.04843e+08	8.55923e+08	9.62961e+08	1.02126e+09	1.05632e+09	9.5579e+08	3560.94	3742.64	4194.64	3740.82	3437.57	3553.7	3376.3	3579.25	4062.99	3991.35	4203.72	4023.66	3800.65	3693.04	3993.66
Q32PX7	Far upstream element-binding protein 1 OS=Rattus norvegicus GN=Fubp1 PE=1 SV=1 - [FUBP1_RAT]	67.1553	2.78578e+08	3.10753e+08	3.64501e+08	3.57614e+08	3.74994e+08	268778342	320559058	3.69312e+08	3.11571e+08	3.15057e+08	2.99594e+08	301376077	2.87064e+08	2.81207e+08	364767263	3.52245e+08	343970777	305210302	3.46646e+08	3.61683e+08	4.23179e+08	3.6822e+08	4.14831e+08	4.10208e+08	2.79964e+08	300828004	3.09043e+08	272628055	3.03016e+08	3.39122e+08	2.92857e+08	3.26243e+08	3546.44	2459.48	3485.79	3159.68	2634.34	2001.81	3406.45	4056.21	2307.95	2323.37	2246.71	2163.75	1402.2	1736.22	2091.98
P19356	Porphobilinogen deaminase OS=Rattus norvegicus GN=Hmbs PE=1 SV=2 - [HEM3_RAT]	39.3367	1.45439e+08	1.50019e+08	1.5378e+08	2.19576e+08	1.5939e+08	2.13308e+08	2.0086e+08	1.7491e+08	1.53734e+08	1.35421e+08	1.86102e+08	1.68988e+08	1.45135e+08	1.56525e+08	2.31953e+08	2.50638e+08	1.76775e+08	1.30999e+08	1.76905e+08	1.83302e+08	2.08672e+08	1.42698e+08	2.42517e+08	2.19979e+08	1.48831e+08	1.76146e+08	1.65596e+08	1.69731e+08	2.43224e+08	2.01671e+08	2.56138e+08	2.0559e+08	3541.92	2790.21	3249.72	3027.54	2987.64	2744.71	3270.06	3235.79	2767.1	3000.46	2488.16	2794.85	3000.23	2880.57	2968.81
O35331	Pyridoxal kinase OS=Rattus norvegicus GN=Pdxk PE=1 SV=1 - [PDXK_RAT]	34.8856	1.73481e+08	1.56899e+08	2.05151e+08	2.13484e+08	1.83086e+08	2.31411e+08	2.42451e+08	1.90535e+08	1.92118e+08	1.77023e+08	2.10943e+08	2.22034e+08	2.3108e+08	2.10411e+08	2.58153e+08	2.91291e+08	2.39562e+08	2.07035e+08	2.50721e+08	2.56199e+08	2.64048e+08	2.29751e+08	2.72235e+08	306460203	2.28351e+08	2.64487e+08	2.61184e+08	2.22615e+08	3.06407e+08	2.81016e+08	2.9257e+08	2.85885e+08	3509.23	2439.3	3922.86	3048.48	3039.95	2407.63	3704.2	3314.66	2706.07	2776.63	2815.61	2545.03	2745.64	2784.22	2817.68
Q9Z0W7	Chloride intracellular channel protein 4 OS=Rattus norvegicus GN=Clic4 PE=1 SV=3 - [CLIC4_RAT]	28.6147	4.20257e+08	2.87763e+08	4.93924e+08	3.84285e+08	4.06875e+08	3.17572e+08	4.81926e+08	4.93036e+08	4.06641e+08	3.12687e+08	378046179	3.43868e+08	3.93468e+08	3.56504e+08	4.69616e+08	5.93687e+08	5.1011e+08	3.6769e+08	5.16033e+08	4.26578e+08	4.3785e+08	3.90085e+08	478938641	5.57083e+08	4.15926e+08	4.79325e+08	5.04556e+08	448402893	4.89666e+08	4.93993e+08	5.23742e+08	4.8245e+08	3496.21	3136.08	3751.19	3235.27	3508.76	3097.9	3579.73	3821.35	3021.65	3290.77	3017.34	3308.77	3102.85	3083.6	3522.75
P09456	cAMP-dependent protein kinase type I-alpha regulatory subunit OS=Rattus norvegicus GN=Prkar1a PE=2 SV=2 - [KAP0_RAT]	43.068	4.37971e+08	4.32248e+08	4.34293e+08	5.22114e+08	5.46622e+08	6.08535e+08	4.90281e+08	5.75502e+08	5.27886e+08	3.92495e+08	5.03925e+08	4.31452e+08	4.81116e+08	4.33878e+08	5.76443e+08	6.75419e+08	5.78201e+08	4.5404e+08	5.64627e+08	4.75122e+08	6.25881e+08	4.77942e+08	5.97608e+08	6.826e+08	5.0174e+08	5.40064e+08	4.60995e+08	5.00757e+08	7.97867e+08	6.6271e+08	5.73945e+08	6.55374e+08	3489.32	2668.45	3223.05	2712.78	2823.88	2430.62	3323.56	3219.47	2725.93	2994.84	2659.84	2820.1	2693.87	3021.6	3338.3
O70196	Prolyl endopeptidase OS=Rattus norvegicus GN=Prep PE=1 SV=1 - [PPCE_RAT]	80.6899	2.40929e+08	1.88534e+08	2.30971e+08	2.88106e+08	2.74202e+08	2.42676e+08	2.78176e+08	4.17167e+08	235073474	1.88967e+08	2.26384e+08	2.52667e+08	256554346	2.67029e+08	3.08565e+08	3.83766e+08	2.65778e+08	2.63862e+08	2.92879e+08	3.12643e+08	2.79699e+08	2.73542e+08	3.67184e+08	3.36351e+08	2.55476e+08	3.15786e+08	2.98881e+08	3.05186e+08	377768986	3.47074e+08	3.90878e+08	3.72639e+08	3483.62	2856.7	3771.69	3166.97	3749.73	2171.39	4018.48	4264.77	2621.97	2256.26	2744.52	2708.09	1898.64	2190.17	2758.41
Q9ESS6	Basal cell adhesion molecule OS=Rattus norvegicus OX=10116 GN=Bcam PE=2 SV=1 - [BCAM_RAT]	67.4694	3.3058e+08	6.42852e+08	4.45501e+08	5.9538e+08	3.64407e+08	7.13119e+08	4.5977e+08	3.41482e+08	5.48447e+08	5.15656e+08	5.78877e+08	5.56148e+08	5.40174e+08	5.37835e+08	6.14906e+08	6.88843e+08	625876460	5.43654e+08	733353249	6.86789e+08	7.91585e+08	6.68455e+08	771054900	8.86555e+08	6.69856e+08	5.95501e+08	6.9774e+08	6.69159e+08	7.17707e+08	7.70138e+08	9.25399e+08	9.49679e+08	3482.46	5080.05	4204.57	5228.15	4277.65	5031.69	4567.91	4312.81	4275.76	3750.17	4295.21	4421.09	5338.97	4020.81	4094.84
Q05982	Nucleoside diphosphate kinase A OS=Rattus norvegicus GN=Nme1 PE=1 SV=1 - [NDKA_RAT]	17.1818	1.63511e+09	1.7257e+09	1.95593e+09	2.11993e+09	2.47267e+09	1.84916e+09	2.65013e+09	2.50513e+09	3.13295e+09	2.91405e+09	3.98914e+09	3.53258e+09	3988906185	3169629781	4.58318e+09	4.13655e+09	3.70756e+09	3.10966e+09	4221266286	4.08469e+09	4.98697e+09	4.66461e+09	5568296150	5.26376e+09	3.34437e+09	3311170646	4.05785e+09	3.82287e+09	4.29557e+09	4.70471e+09	5.0279e+09	4.55253e+09	3379.39	2764.58	3146.04	2990.55	3424.09	2686.47	3040.37	2966.43	3247.65	3203.76	3493.26	3530.45	3477.69	3377.78	3802.43
P01835	Ig kappa chain C region, B allele OS=Rattus norvegicus PE=1 SV=1 - [KACB_RAT]	11.5935	1.91251e+09	2.72773e+09	2.34358e+09	2.74676e+09	2.96324e+09	2.67598e+09	2.51835e+09	2.12896e+09	3.52911e+09	2.89292e+09	3.87095e+09	3.59845e+09	4.18504e+09	3.1443e+09	3.59682e+09	3.7276e+09	3.49864e+09	2.37696e+09	3.76135e+09	3.40777e+09	4018395074	3.27678e+09	3.76805e+09	3.61627e+09	4.7352e+09	4.30021e+09	4.0558e+09	4.59139e+09	4.37047e+09	4.01784e+09	4.97235e+09	4.43929e+09	3339.59	3896.25	3621.77	3662.68	3297.96	3671.83	4303.17	3294.28	3807.75	4100.41	4468.58	4376.75	4223.09	4428.69	4347.65
P05545	Serine protease inhibitor A3K OS=Rattus norvegicus GN=Serpina3k PE=1 SV=3 - [SPA3K_RAT]	46.5321	3.00966e+08	1.85809e+08	2.27253e+08	3.13698e+08	3.05629e+08	2.38431e+08	2.52062e+08	3.17729e+08	6.14055e+08	4.66034e+08	4.67561e+08	5.7331e+08	5.06018e+08	4.26787e+08	5.79155e+08	5.96023e+08	5.81105e+08	427188049	3.41989e+08	5.19061e+08	3.95052e+08	427921650	4.71335e+08	4.70838e+08	5.05859e+08	4.60259e+08	5.8361e+08	4.30382e+08	5.48369e+08	6.40009e+08	5.72574e+08	6.1323e+08	3337.95	3131.34	3310.52	2999.14	3372.98	2697.65	3833.66	4644.61	4346.06	4365.66	4041.82	4531.33	4262.64	4348.71	5282.32
Q6MG61	Chloride intracellular channel protein 1 OS=Rattus norvegicus GN=Clic1 PE=1 SV=1 - [CLIC1_RAT]	26.9638	8.30646e+08	7.91997e+08	9.0466e+08	1005931333	8.17036e+08	9.7727e+08	9.70284e+08	9.12479e+08	1.00501e+09	8.56887e+08	1.00179e+09	1.12673e+09	1.1144e+09	1.08495e+09	1.33177e+09	1.45623e+09	1.21573e+09	1.22138e+09	1.20029e+09	1.22182e+09	1.23428e+09	1.0521e+09	1.39609e+09	1.33348e+09	1.08257e+09	1.19727e+09	1.22393e+09	1.13801e+09	1.28328e+09	1.32564e+09	1.49077e+09	1.21085e+09	3325.33	3202.45	3953.12	3622.36	3569.5	2467.05	4043.52	3854.81	2956.94	3036.01	3163.34	3181.74	3046.28	3097.82	3024.87
Q99PF5	Far upstream element-binding protein 2 OS=Rattus norvegicus GN=Khsrp PE=1 SV=1 - [FUBP2_RAT]	74.1805	2.56786e+08	2.70331e+08	2.6131e+08	3.2658e+08	3.118e+08	272545502	2.13043e+08	2.42007e+08	3.70774e+08	3.33558e+08	3.00606e+08	3.70268e+08	3.3558e+08	3.12501e+08	3.1307e+08	4.01523e+08	3.93094e+08	3.08923e+08	4.0473e+08	4.80558e+08	4.79512e+08	4.2254e+08	4.49353e+08	4.67333e+08	3.10575e+08	3.27596e+08	3.2543e+08	329019018	3.22979e+08	3.86024e+08	3.48499e+08	445147580	3323.11	2638.42	3404.82	3276.48	2604.17	2366.27	2642.6	3138.82	3146.33	2899.31	3003.34	3139.24	2279.3	2012.71	2178.46
Q4FZU6	Annexin A8 OS=Rattus norvegicus GN=Anxa8 PE=1 SV=1 - [ANXA8_RAT]	36.6826	4.36648e+08	3.77206e+08	4.8157e+08	4.94807e+08	5.09571e+08	4.71266e+08	4.80209e+08	4.66812e+08	7.81149e+08	6.60985e+08	7.31777e+08	8.3361e+08	8.38459e+08	7.49804e+08	9.0757e+08	1.06156e+09	9.15977e+08	8.45568e+08	8.36753e+08	984732303	9.45429e+08	838805788	1.10926e+09	1.12736e+09	7.69906e+08	8.28526e+08	8.59523e+08	8.70657e+08	1.02816e+09	9.24727e+08	1.03669e+09	9.57888e+08	3315.2	2392.73	3213.38	3009.74	2966.26	2552.73	2845.94	2866.64	3659.26	3506.19	3764.84	4085	3657.12	3559.63	3568.03
Q6MG60	N(G),N(G)-dimethylarginine dimethylaminohydrolase 2 OS=Rattus norvegicus GN=Ddah2 PE=1 SV=1 - [DDAH2_RAT]	29.6694	3.67312e+08	3.23463e+08	4.14217e+08	4.34883e+08	3.33604e+08	4.30434e+08	4.78552e+08	3.89501e+08	2.77541e+08	2.64517e+08	2.87064e+08	3.09565e+08	3.14129e+08	269148076	3.50926e+08	3.87395e+08	3.05368e+08	2.85663e+08	3.00508e+08	2.99648e+08	3.79518e+08	2.60374e+08	3.97187e+08	3.92728e+08	2.80522e+08	3.05271e+08	3.52938e+08	3.24546e+08	4.19602e+08	3.80666e+08	4.34442e+08	3.9398e+08	3311.81	2425.04	3178.54	2857.19	2728.16	2452.73	3462.83	3183.37	2229.87	2016.84	2225.23	2086.93	1939.14	1940.15	2098.44
Q4G075	Leukocyte elastase inhibitor A OS=Rattus norvegicus GN=Serpinb1a PE=1 SV=1 - [ILEUA_RAT]	42.6998	330226713	3.19147e+08	356215337	4.08286e+08	404338270	3.7008e+08	3.63249e+08	3.54639e+08	381912090	3.13315e+08	3.65903e+08	3.51182e+08	3.53171e+08	3.66807e+08	3.92664e+08	461796314	493956181	4.42388e+08	4.81332e+08	4.8295e+08	4.78306e+08	4.35941e+08	5.18515e+08	5.6071e+08	377763833	3.79275e+08	3.89755e+08	3.78636e+08	4.43127e+08	4.03172e+08	4.90526e+08	5.19749e+08	3279.02	2182.48	3098.72	2175.94	2677.66	1902.9	2928	3250.67	2408.76	2393.96	2134.78	2220.74	1767.59	2118.62	2304.4
P38659	Protein disulfide-isomerase A4 OS=Rattus norvegicus GN=Pdia4 PE=1 SV=2 - [PDIA4_RAT]	72.6747	2.06795e+08	4.39835e+08	3.22196e+08	4.36919e+08	4.61434e+08	5.48318e+08	361447611	3.21289e+08	5.04188e+08	469295542	5.87716e+08	5.35324e+08	6.39916e+08	578479793	6.55432e+08	7.38957e+08	585847917	5.0163e+08	7.10607e+08	6.42703e+08	8.30694e+08	6.9051e+08	7.84582e+08	7.93435e+08	669593998	7.32879e+08	6.57856e+08	702578358	7.96135e+08	7.59362e+08	9.11818e+08	9.19633e+08	3242.36	4456.23	4523.1	4623.28	4426.69	5046.33	4181.63	3595.28	4792.7	4419.82	4608.78	4626.16	4755.17	4939.97	5123.33
Q6IFW6	Keratin, type I cytoskeletal 10 OS=Rattus norvegicus GN=Krt10 PE=3 SV=1 - [K1C10_RAT]	56.4705	4.04136e+08	0	0	1.97212e+08	2.27486e+08	9.32428e+07	7.79455e+07	1.80876e+09	102038218	8.40124e+07	0	1.06752e+08	3.14076e+08	2.17307e+08	1.0734e+08	1.00219e+08	1.48217e+08	1.19729e+08	1.12158e+08	1.21984e+08	3.31509e+08	2.70912e+08	9.77668e+07	116718323	61313841	2.51521e+08	9.05565e+07	0	1.37627e+08	156488543	1.28481e+08	5.54138e+07	3240.16			2136.28	3471.5	530.497	288.436	4948.46	219.842	74.7428		75.9611	1526.99	350.646	89.5145
P04905	Glutathione S-transferase Mu 1 OS=Rattus norvegicus GN=Gstm1 PE=1 SV=2 - [GSTM1_RAT]	25.8971	9.85444e+08	8.30069e+08	1.15853e+09	1.19089e+09	1.23055e+09	9.56735e+08	1.3666e+09	1344621352	1.0116e+09	8.45299e+08	1.13149e+09	1.07914e+09	1.09747e+09	1.0111e+09	1.53657e+09	1.43979e+09	1.04443e+09	9.0385e+08	1.21215e+09	1.26416e+09	1.2843e+09	1.09509e+09	1.68725e+09	1.4225e+09	9.97956e+08	1.08559e+09	1.26727e+09	1.20252e+09	1.39882e+09	1.31533e+09	1.50442e+09	1.32599e+09	3239.13	2894.78	3419.01	3504.14	3063.69	2266.93	3308.69	3786.27	2964.34	2608.26	2885.49	3251.16	2457.46	2756.37	2919.17
P27321	Calpastatin OS=Rattus norvegicus GN=Cast PE=1 SV=3 - [ICAL_RAT]	77.2659	2.20636e+08	1.96602e+08	2.54535e+08	2.47458e+08	2.55408e+08	2.58799e+08	4.4449e+08	1.97661e+08	2.52287e+08	2.29401e+08	2.3818e+08	2.68927e+08	2.44089e+08	2.42147e+08	2.67101e+08	3.06219e+08	2.67668e+08	2.51602e+08	2.91543e+08	2.88483e+08	3.43382e+08	2.60624e+08	3.44266e+08	3.25689e+08	2.10733e+08	2.52216e+08	2.40434e+08	2.16557e+08	2.89192e+08	3.60682e+08	2.77562e+08	2.34783e+08	3239.04	2820.6	3049.49	3117.95	2862.7	2277.64	3425.42	2857.44	2629.71	2672.69	2559.48	2596.22	2789.41	2714.42	2662.36
Q4TU93	C-type mannose receptor 2 OS=Rattus norvegicus GN=Mrc2 PE=1 SV=1 - [MRC2_RAT]	166.916	1.34163e+08	1.56086e+08	1.48426e+08	1.7976e+08	1.49813e+08	1.95732e+08	1.80298e+08	1.72629e+08	1.34912e+08	1.10197e+08	1.24051e+08	1.29096e+08	1.29016e+08	1.75875e+08	1.63754e+08	1.70829e+08	1.40723e+08	1.15441e+08	1.53358e+08	1.65315e+08	1.48936e+08	1.17736e+08	1.84353e+08	1.58363e+08	1.51115e+08	154666966	1.47057e+08	1.32585e+08	2.02597e+08	1.73568e+08	1.87686e+08	1.69833e+08	3225.42	2539.33	3206.9	2801.46	2311.18	2244.53	3776.73	3794.48	1214.31	1540.07	1426.31	1580.77	1461.73	1459.55	1389.45
Q8VHV7	Heterogeneous nuclear ribonucleoprotein H OS=Rattus norvegicus GN=Hnrnph1 PE=1 SV=2 - [HNRH1_RAT]	49.1573	8.77511e+08	8.52557e+08	1.02553e+09	1.1095e+09	1.04868e+09	1.09068e+09	1.07429e+09	1.0323e+09	1.05951e+09	8.33638e+08	1.03945e+09	1.17357e+09	1.17056e+09	1.0595e+09	1.41671e+09	1.52657e+09	1.26074e+09	1.18588e+09	1.31413e+09	1.35617e+09	1.48334e+09	1359620424	1.62138e+09	1.74149e+09	9.53398e+08	1.02776e+09	1.06286e+09	1.16949e+09	1.22961e+09	1.26415e+09	1.50178e+09	1.39093e+09	3224.5	3071.97	3701.84	3465.86	3374.03	3160.85	3491.62	3744.36	3256.92	3069.63	3476.89	2814.68	3128.62	3279.71	3236.91
P61589	Transforming protein RhoA OS=Rattus norvegicus GN=Rhoa PE=1 SV=1 - [RHOA_RAT]	21.7681	6.55406e+08	7.55713e+08	8.44374e+08	9.12833e+08	752100762	9.68328e+08	9.01396e+08	9.11822e+08	1.24353e+09	1.15215e+09	1.34742e+09	1.26335e+09	1.38937e+09	1.10113e+09	1.53729e+09	1.50906e+09	1.76778e+09	1.43003e+09	1.85101e+09	1.5442e+09	1.7711e+09	1.6467e+09	1.87393e+09	1.88677e+09	1.1985e+09	1.32612e+09	1.353e+09	1.18039e+09	1.49945e+09	1.52522e+09	1536129031	1.42394e+09	3218.18	3485.96	3323.3	3628.55	3800.76	3557.28	3338.16	3764.91	4045.54	3655	3998.33	3842.3	3991.29	3382.56	3922.98
Q6AY09	Heterogeneous nuclear ribonucleoprotein H2 OS=Rattus norvegicus GN=Hnrnph2 PE=1 SV=1 - [HNRH2_RAT]	49.2623	8.77511e+08	8.55462e+08	1.02553e+09	1.27409e+09	1.02745e+09	1.09068e+09	1.10056e+09	9.98411e+08	1.05951e+09	8.29421e+08	1.03945e+09	1.17357e+09	1.17056e+09	1.0595e+09	1.41671e+09	1.52657e+09	1.25732e+09	1.16747e+09	1.31413e+09	1.33535e+09	1.48334e+09	1359620424	1.62138e+09	1.74149e+09	937737003	1.06008e+09	1.14576e+09	1.16949e+09	1.27321e+09	1.37323e+09	1.50178e+09	1.39093e+09	3215.73	2726.52	3197.61	2947.62	3202.63	2548.02	3358.39	3728.58	2602.51	2679.28	2548.94	2464.32	2741.61	2697.24	2776.41
Q62658	Peptidyl-prolyl cis-trans isomerase FKBP1A OS=Rattus norvegicus GN=Fkbp1a PE=1 SV=3 - [FKB1A_RAT]	11.9151	1.62133e+09	1.36257e+09	1.63023e+09	1.5397e+09	2.13284e+09	1.8524e+09	1935419649	1.78958e+09	1499247689	1.26524e+09	1.72403e+09	1.47096e+09	1.74364e+09	1.48102e+09	1.80943e+09	1.93273e+09	1.9916e+09	1.38442e+09	1.73592e+09	1.53975e+09	1.85119e+09	1.6775e+09	1.89182e+09	1.85261e+09	1.37976e+09	1.50365e+09	1.52124e+09	1.62036e+09	1.90161e+09	1.80842e+09	1.72093e+09	1.51338e+09	3215.66	2676.34	3645.72	2552.51	3162.48	2289.96	3596.91	3448.95	2472.08	2474.13	2356.14	2384.49	2251.48	2344.31	1950.63
P00786	Pro-cathepsin H OS=Rattus norvegicus GN=Ctsh PE=1 SV=1 - [CATH_RAT]	37.0799	1.22097e+09	1.07033e+09	1378459447	1.45488e+09	1.59406e+09	1.22395e+09	1.70716e+09	1.56363e+09	1.50538e+09	1.19865e+09	1.57556e+09	1.66176e+09	1.6379e+09	1.40477e+09	1.98145e+09	2.28956e+09	1.98619e+09	1.55287e+09	1.98051e+09	1.81941e+09	1.94101e+09	1.68309e+09	2.3148e+09	2.05705e+09	1.5389e+09	1673581652	1.80694e+09	1.77562e+09	2092860600	2.06038e+09	2.13848e+09	1.8855e+09	3194.18	2404.86	3602.67	2573.21	3999.98	1876.57	5113.5	3896.95	2558.32	2217.54	2640.14	2773.33	2220.34	2204.81	2652.06
P47727	Carbonyl reductase [NADPH] 1 OS=Rattus norvegicus GN=Cbr1 PE=1 SV=2 - [CBR1_RAT]	30.5589	5.99978e+08	6.05712e+08	6.15306e+08	6.19511e+08	5.44397e+08	7.5905e+08	5.52637e+08	5.88284e+08	1.001e+09	8.63836e+08	8.98697e+08	9.0516e+08	1.18604e+09	9.16384e+08	9.20744e+08	1.10661e+09	1.10086e+09	986719584	1.47771e+09	1.55716e+09	1.78893e+09	1.50958e+09	1.34676e+09	1509011010	8.01394e+08	8.32137e+08	7.60733e+08	756941436	6.59279e+08	8.29786e+08	1.19305e+09	1.32225e+09	3190.31	3187.76	3228.75	3437.71	2688.19	3033.1	3827.63	3155.57	3821.1	3188.47	3485.65	3329.92	3753.39	3487.37	3671.73
P24268	Cathepsin D OS=Rattus norvegicus GN=Ctsd PE=1 SV=1 - [CATD_RAT]	44.6519	7.53739e+08	7.16518e+08	9.11286e+08	9.91788e+08	9.47088e+08	8.527e+08	9.38621e+08	9.66895e+08	1.13766e+09	1.0356e+09	1.15995e+09	1.37286e+09	1.16671e+09	1224164287	1344629465	1.49998e+09	1.56924e+09	1.37168e+09	1.61312e+09	1.6481e+09	1.55894e+09	1.41333e+09	1.79216e+09	1.86274e+09	1.32027e+09	1.37643e+09	1.46465e+09	1.45613e+09	1.58423e+09	1.56494e+09	1.77531e+09	1.6361e+09	3182.42	2470.45	2881.78	2642.61	2974.38	2557.16	2753.65	3100.99	3080.59	2789.34	3215.72	3102.55	3112.37	3155.25	3090.59
P63029	Translationally-controlled tumor protein OS=Rattus norvegicus GN=Tpt1 PE=1 SV=1 - [TCTP_RAT]	19.4496	1.78224e+09	1.2278e+09	1.78867e+09	1.72792e+09	2.07976e+09	1.62949e+09	1.6402e+09	1.88815e+09	2.70034e+09	2.25558e+09	2.70241e+09	2.65294e+09	2.92029e+09	2589316957	3.4617e+09	3.59252e+09	3.28082e+09	2.73414e+09	2.70112e+09	2806472066	3057712060	2.73995e+09	3.51869e+09	2.94099e+09	2.55337e+09	2.81216e+09	2902692042	2.58813e+09	3.54728e+09	3.35679e+09	3.14772e+09	2.76626e+09	3156.97	2458.41	2984.44	3012.9	4052.88	2474.01	3884.25	3775.54	3367.39	3507.61	3574.69	3887.63	3759.9	3377.11	3733.95
Q3T1K5	F-actin-capping protein subunit alpha-2 OS=Rattus norvegicus GN=Capza2 PE=1 SV=1 - [CAZA2_RAT]	32.9466	7.24841e+08	8.00091e+08	9.27728e+08	9.97569e+08	8.42089e+08	9.81901e+08	8.98215e+08	8.31458e+08	8.50961e+08	8.31021e+08	8.88559e+08	9.60914e+08	9.06806e+08	9.34955e+08	1.02054e+09	1.19136e+09	978678698	906383350	9.88775e+08	1.04544e+09	1.10118e+09	9.6019e+08	1168773522	1.21627e+09	1.01275e+09	1.06352e+09	1.13658e+09	1.09971e+09	1.22376e+09	1.25702e+09	1.25712e+09	1.20789e+09	3148.85	2256.72	2921.67	2653.1	3261.88	2536.19	3376.48	2830.29	2652.28	2443.58	2222.75	2336.06	2304.43	2883.09	2606.47
P62138	Serine/threonine-protein phosphatase PP1-alpha catalytic subunit OS=Rattus norvegicus GN=Ppp1ca PE=1 SV=1 - [PP1A_RAT]	37.4878	3.79037e+08	4.41873e+08	4.36894e+08	543672194	4.54952e+08	5.80369e+08	5.14182e+08	4.70392e+08	5.58368e+08	5.13905e+08	5.51788e+08	573481529	6.58904e+08	5.92421e+08	7.25399e+08	8.59557e+08	658477538	5.26087e+08	7.44636e+08	6.90056e+08	888607771	6.78038e+08	8.7206e+08	8.67767e+08	5.20502e+08	5.70116e+08	5.17311e+08	5.66322e+08	7.20729e+08	6.09174e+08	8.21512e+08	7.77269e+08	3122.7	2965.04	3870.46	3454.53	3278.83	3200.55	3446.3	3960.58	3346.55	3110.99	3399.67	3512.29	3359.34	3370.43	3545.47
P20759	Ig gamma-1 chain C region OS=Rattus norvegicus PE=1 SV=1 - [IGHG1_RAT]	35.9227	1000886835	1.30408e+09	1221332773	1.30346e+09	1.33181e+09	1.56316e+09	1.32637e+09	1.05705e+09	1628549122	1.60062e+09	2003380011	1.65513e+09	1.81455e+09	1.91841e+09	1.82809e+09	2.28003e+09	1.71705e+09	1.42346e+09	2.05934e+09	1.81526e+09	2.65776e+09	1.98971e+09	2.0754e+09	2.31162e+09	2360976430	2649879773	2.26331e+09	2.34301e+09	2.69157e+09	2.52568e+09	2.90095e+09	2.91026e+09	3103.56	3671.05	4017.88	3669.23	3246.7	3062.9	3456.83	3485.73	3815.31	3217.12	3518.81	3637.81	3657.69	3586.28	3498.45
Q9R063	Peroxiredoxin-5, mitochondrial OS=Rattus norvegicus GN=Prdx5 PE=1 SV=1 - [PRDX5_RAT]	22.1646	1.23092e+09	1.06186e+09	1.43645e+09	1.39574e+09	1.51619e+09	1.2087e+09	1.41194e+09	1.29223e+09	2.00535e+09	1.78116e+09	2.03741e+09	2.31277e+09	2.01756e+09	1.88004e+09	2.67682e+09	3.01832e+09	2.47006e+09	2.33532e+09	2415874049	2.468e+09	2.57187e+09	2.11013e+09	3.13002e+09	3.06387e+09	2.04133e+09	2.22849e+09	2.25539e+09	2.00135e+09	2593481426	2.43229e+09	2.73829e+09	2.51354e+09	3099.17	2659.72	3134.72	2611.81	3172.6	2428.56	2756.79	3219.1	3394.34	3192.56	3199.32	3397.97	2946.22	3037.02	3380.96
P97536	Cullin-associated NEDD8-dissociated protein 1 OS=Rattus norvegicus GN=Cand1 PE=1 SV=1 - [CAND1_RAT]	136.275	1.53498e+08	2.3725e+08	2.11544e+08	2.74268e+08	98211739	4.13303e+08	5.1725e+08	2.42947e+08	2.0753e+08	1.05582e+09	9.15557e+08	1.93051e+08	9.48233e+08	1.97223e+08	2.5189e+08	3.46842e+08	1207450623	1.20889e+09	3.1894e+08	2.95562e+08	3.57629e+08	1.02166e+09	1.00398e+09	3.8397e+08	2.83891e+08	3.3802e+08	2.71376e+08	2.69007e+08	3.69677e+08	3.36405e+08	9.64661e+08	4.6767e+08	3094.16	3863.58	4377.62	4440.43	683.204	5172.67	4302.48	4852.31	2536.51	2886.87	2243.39	2813.62	2711.37	2810.08	2589.98
P62142	Serine/threonine-protein phosphatase PP1-beta catalytic subunit OS=Rattus norvegicus GN=Ppp1cb PE=1 SV=3 - [PP1B_RAT]	37.1626	3.79037e+08	4.41873e+08	4.36894e+08	543672194	4.59546e+08	5.88395e+08	5.14182e+08	4.70392e+08	5.58368e+08	5.13905e+08	5.51788e+08	573481529	6.58904e+08	5.92421e+08	7.25399e+08	8.59557e+08	658477538	5.26087e+08	7.44636e+08	6.90056e+08	888607771	6.78038e+08	8.7206e+08	8.67767e+08	5.20502e+08	5.70116e+08	5.17311e+08	5.66322e+08	7.20729e+08	6.09174e+08	8.21512e+08	7.77269e+08	3093.58	3322.54	3886.94	3620.71	3477.43	3363.59	3472.08	4026.84	3389.47	3449.68	3702.71	3836.18	3632.62	3642.69	3866.07
P08009	Glutathione S-transferase Yb-3 OS=Rattus norvegicus GN=Gstm3 PE=1 SV=2 - [GSTM4_RAT]	25.664	1.51728e+09	1.29827e+09	1.62386e+09	1924693584	1.76275e+09	1.71178e+09	1.9747e+09	1.91065e+09	1664134675	1.36426e+09	1.61869e+09	1.62356e+09	1896415912	1.83354e+09	2.43508e+09	2329877597	1.60212e+09	1.4091e+09	1.70887e+09	1.77674e+09	2.00794e+09	1.85541e+09	2.4065e+09	2.26577e+09	1.61371e+09	1752362155	2.14273e+09	2.01157e+09	2.11951e+09	2.23719e+09	2.34219e+09	2035646140	3069.31	2451.57	3526.97	3147.69	3180.79	2581.69	3610.44	3461.89	2601.43	2119.92	2646.42	2641.7	2571.31	2372.56	2652.57
D3ZW55	Inosine triphosphate pyrophosphatase OS=Rattus norvegicus GN=Itpa PE=3 SV=1 - [ITPA_RAT]	21.9131	415850995	3.59044e+08	4.81391e+08	4.55845e+08	5.74389e+08	4.6516e+08	4.8577e+08	4.47344e+08	4.78471e+08	4.38192e+08	4.6544e+08	4.96372e+08	4.97543e+08	4.90707e+08	5.81262e+08	6.70921e+08	5.40568e+08	4.86647e+08	5.81685e+08	5.36392e+08	6.82733e+08	5.79812e+08	7.36411e+08	6.70997e+08	4.8397e+08	5.51558e+08	519173417	4.98475e+08	6.57342e+08	5.76152e+08	6.87489e+08	6.11949e+08	3035.05	2424.62	3213.57	3090.44	2872.71	2740.59	3165	3200.53	2762.78	2673.72	2656.04	2963.26	2722.23	2751.28	3350.86
P30009	Myristoylated alanine-rich C-kinase substrate OS=Rattus norvegicus GN=Marcks PE=1 SV=2 - [MARCS_RAT]	29.7769	2.21173e+08	2.60024e+08	2.34361e+08	289134292	2.32814e+08	3.23704e+08	2.64519e+08	2.38071e+08	2.55227e+08	2.70302e+08	2.54828e+08	2.4494e+08	2.56388e+08	3.23296e+08	3.30627e+08	3.31711e+08	3.14285e+08	2.60918e+08	3.25238e+08	2.82016e+08	3.26497e+08	3.38081e+08	3.45587e+08	3.09061e+08	2.22678e+08	2.05609e+08	2.37666e+08	2.7585e+08	2.44468e+08	3.25068e+08	246248217	2.59569e+08	3029.77	2809.23	2649.43	2922.69	2687.28	3172.74	2749.71	2708.66	3218.23	3326.92	2781.93	2922.16	2754.38	2730.18	2679.28
P46844	Biliverdin reductase A OS=Rattus norvegicus GN=Blvra PE=1 SV=1 - [BIEA_RAT]	33.5445	2.7598e+08	292032760	3.31875e+08	3.97923e+08	3.80983e+08	3.88065e+08	3.30772e+08	3.38116e+08	3.45348e+08	300387033	3.78431e+08	3.05697e+08	9.19586e+08	3.28228e+08	4.90999e+08	4.89007e+08	3.86898e+08	3.10796e+08	4.40243e+08	4.00027e+08	3.66995e+08	3.03759e+08	4.48273e+08	5.28894e+08	337071858	3.73842e+08	8.44559e+08	444158825	4.93645e+08	4.70711e+08	4.93447e+08	4.9565e+08	3008.47	2650.93	3232.56	2718.56	3284.52	3092.98	3632.02	3381.39	2642.27	2585.44	2839.37	3097.79	2746.21	3139.13	3341.61
B2GUZ5	F-actin-capping protein subunit alpha-1 OS=Rattus norvegicus GN=Capza1 PE=1 SV=1 - [CAZA1_RAT]	32.8893	6.53853e+08	7.11245e+08	767070806	841699734	741566199	8.88883e+08	6.91515e+08	7.60783e+08	8.16988e+08	8.35753e+08	8.2267e+08	9.60952e+08	8.94802e+08	8.83957e+08	9.96787e+08	1.15693e+09	9.39236e+08	8.75491e+08	1.03592e+09	1.01024e+09	1113336745	9.83309e+08	1.15333e+09	1.19225e+09	9.50108e+08	1.04275e+09	1.0698e+09	1082414292	1.1707e+09	1195242805	1.23741e+09	1.25026e+09	3002	2586.22	3094.07	2832.2	2946.66	2308.51	3377.19	3321.6	2491.94	2702.28	2297.67	2676.4	2300.98	2390.14	2548.21
Q794E4	Heterogeneous nuclear ribonucleoprotein F OS=Rattus norvegicus GN=Hnrnpf PE=1 SV=3 - [HNRPF_RAT]	45.7009	3.52837e+08	4.13514e+08	4.22152e+08	5.19327e+08	4.71805e+08	5.05356e+08	4.3996e+08	4.78823e+08	484459076	4.08546e+08	4.89354e+08	5.25876e+08	5.43469e+08	4.75631e+08	5.53822e+08	6.74134e+08	6.58339e+08	5.19485e+08	7.48771e+08	7.68427e+08	7.8625e+08	6.88123e+08	7.93501e+08	9.06294e+08	4.76513e+08	5.2341e+08	5.14553e+08	5.11918e+08	5.96312e+08	534572785	6.38461e+08	6.01072e+08	2950.56	2730.06	3148.27	3198.44	3134.39	3281.5	3536.99	3727.63	2761.36	2803.3	2777.32	2866.65	3297.46	3309.78	3018.44
P52555	Endoplasmic reticulum resident protein 29 OS=Rattus norvegicus GN=Erp29 PE=1 SV=2 - [ERP29_RAT]	28.5569	6.35601e+08	4.62844e+08	6.596e+08	6.38296e+08	7.07554e+08	4.45581e+08	6.11736e+08	637523992	8.34035e+08	7.89264e+08	8.55786e+08	926710932	8.33519e+08	7.54416e+08	1.06935e+09	1.13856e+09	1.03602e+09	883081706	9.31366e+08	1.05889e+09	1056722244	8.71775e+08	1.1718e+09	1057182181	8.2813e+08	8.91922e+08	9.92337e+08	8.86448e+08	1054630135	1.01731e+09	1025766981	1.04038e+09	2919.18	1861.47	2697.81	2188.57	2681.59	2091.04	2114.99	2769.47	2407.35	2102.98	2368.88	2329.49	2263.05	1803.12	2109.88
Q3T1J1	Eukaryotic translation initiation factor 5A-1 OS=Rattus norvegicus GN=Eif5a PE=1 SV=3 - [IF5A1_RAT]	16.8214	2.76657e+08	3.42238e+08	3.43606e+08	4.49295e+08	2.86225e+08	4.39674e+08	3.48092e+08	3.42093e+08	6.57352e+08	5.84705e+08	8.14936e+08	6.74763e+08	809510104	7.47808e+08	7.58749e+08	9.20647e+08	8.99154e+08	6.95675e+08	1262713733	1086736141	1.17292e+09	1.04908e+09	1.11128e+09	1.14412e+09	6.24547e+08	7.05522e+08	5.88671e+08	6.54315e+08	6.3935e+08	6.44399e+08	8.90073e+08	7.76154e+08	2917.33	3749.79	3540.03	3193.12	2813.12	3295.8	3399	2794.01	5070.15	5990.01	5551.15	4484.62	5135.3	5675.47	4556.32
P18297	Sepiapterin reductase OS=Rattus norvegicus GN=Spr PE=1 SV=1 - [SPRE_RAT]	28.1105	1.17661e+08	1.46467e+08	1.40188e+08	2.00578e+08	2.15893e+08	1.69149e+08	2.38388e+08	2.32378e+08	9.4935e+07	83702074	1.00623e+08	1.01025e+08	1.08568e+08	8.54666e+07	1.22463e+08	1.26571e+08	8.09045e+07	6.28508e+07	8.01714e+07	8.53015e+07	8.31542e+07	8.11933e+07	1.36595e+08	1.00563e+08	7.8807e+07	1.03648e+08	8.40778e+07	9.56682e+07	1.1778e+08	9.8834e+07	1.41834e+08	1.0157e+08	2900.31	1983.43	2570.37	2275.49	2780.17	1836.76	2759.9	3044.41	1543.34	1120.38	1188.46	1371.48	1196.27	939.679	1375.57
Q5I0D1	Glyoxalase domain-containing protein 4 OS=Rattus norvegicus GN=Glod4 PE=1 SV=1 - [GLOD4_RAT]	33.2465	4.30682e+08	3.17857e+08	4.81251e+08	4.1854e+08	4.2999e+08	373288579	484393142	4.55174e+08	3.75353e+08	3.56895e+08	3.76365e+08	3.8982e+08	4.25496e+08	400651307	4.81251e+08	5.34698e+08	4.3622e+08	4.07524e+08	4.2444e+08	4.32201e+08	486568003	4.20801e+08	5.02677e+08	5.3998e+08	393641475	4.05615e+08	431808255	4.53793e+08	5.21223e+08	4.89257e+08	5.3336e+08	5.01101e+08	2889.37	2088.69	2522.17	2071.83	2897.27	1879.56	2854.16	2589.93	1894.13	1932.98	2042.21	2175.15	1639.4	1795.82	1966.75
Q7M0E3	Destrin OS=Rattus norvegicus GN=Dstn PE=1 SV=3 - [DEST_RAT]	18.5215	1.1789e+09	1.33021e+09	1.48201e+09	1.44263e+09	1.51946e+09	1.43079e+09	1.35811e+09	1.3885e+09	2.39226e+09	2.08175e+09	2.50317e+09	2.39737e+09	2.38195e+09	2.09329e+09	2.63756e+09	2.85921e+09	3.0284e+09	2.39144e+09	3.17778e+09	2.83495e+09	2.9225e+09	2.72969e+09	3.242e+09	3.17624e+09	2.30661e+09	2.44778e+09	2.57157e+09	2.47195e+09	2.527e+09	2.52963e+09	2.60964e+09	2375049870	2879.29	2798.73	2720.09	2783.33	3070.26	3226.11	2462.16	2693.87	3329.45	3010.37	3154.54	3751.18	3480.78	3173.09	3111.13
Q75WE7	von Willebrand factor A domain-containing protein 5A OS=Rattus norvegicus GN=Vwa5a PE=2 SV=1 - [VWA5A_RAT]	91.4245	1.39607e+08	1.62554e+08	1.74244e+08	1.97717e+08	1.89584e+08	1.79216e+08	1.67957e+08	1.64091e+08	2.18339e+08	204889470	2.45301e+08	2.52478e+08	2.2708e+08	2.18822e+08	2.47886e+08	2.97046e+08	3.05394e+08	2.41355e+08	3.42863e+08	3.34543e+08	3.67693e+08	3.17649e+08	4.1324e+08	356095305	2.87932e+08	3.3696e+08	3.05873e+08	3.35528e+08	3.80077e+08	3.24046e+08	4.03753e+08	3.65695e+08	2872.56	3050.73	3460.05	2947.15	2768.96	2239.8	3589.67	3379.17	3365.83	3317.04	3396.16	3007.69	3070.14	2999.95	3403.78
P70615	Lamin-B1 OS=Rattus norvegicus GN=Lmnb1 PE=1 SV=3 - [LMNB1_RAT]	66.5656	2.43638e+08	2.7142e+08	2.14766e+08	2.89557e+08	2.33038e+08	2.2532e+08	1.62629e+08	2.20509e+08	3.77729e+08	3.71459e+08	3.45506e+08	3.64981e+08	3.16848e+08	2.26843e+08	3.81116e+08	5.33682e+08	4.76943e+08	3.57065e+08	4.76261e+08	5.00024e+08	3.9262e+08	3.2888e+08	559118658	4.22029e+08	2.71033e+08	2.86526e+08	2.15561e+08	2.7623e+08	3.04223e+08	3.17743e+08	3.21393e+08	3.97882e+08	2852.62	2747.68	2543.35	2987.21	2198.12	2369.69	2268.58	2659.95	2929.95	3050.46	2715.77	3087.41	2741.63	2227.79	2198.24
P63088	Serine/threonine-protein phosphatase PP1-gamma catalytic subunit OS=Rattus norvegicus GN=Ppp1cc PE=1 SV=1 - [PP1G_RAT]	36.9597	3.79037e+08	4.41873e+08	4.36894e+08	543672194	4.54952e+08	5.80369e+08	5.14182e+08	4.70392e+08	5.58368e+08	5.13905e+08	5.51788e+08	573481529	6.58904e+08	5.92421e+08	7.25399e+08	8.59557e+08	658477538	5.26087e+08	7.44636e+08	6.90056e+08	888607771	6.78038e+08	8.7206e+08	8.67767e+08	5.20502e+08	5.70116e+08	5.17311e+08	5.66322e+08	7.20729e+08	6.09174e+08	8.21512e+08	7.77269e+08	2850.95	2813.24	3666.86	3287.02	3177.28	3159.76	3392.27	3822.55	3234.67	3078.81	3264.91	3345.78	3182.3	3307.91	3479.03
Q63617	Hypoxia up-regulated protein 1 OS=Rattus norvegicus GN=Hyou1 PE=1 SV=1 - [HYOU1_RAT]	111.22	2.70773e+08	1.8314e+08	1.53817e+08	2.07506e+08	1.371e+08	2.12555e+08	1.52632e+08	1.54181e+08	2.94234e+08	254031217	2.69396e+08	315732442	2.86246e+08	2.33023e+08	3.20145e+08	3.38408e+08	353458007	2.4817e+08	4.31976e+08	4.5911e+08	323268560	2.78187e+08	5.69726e+08	3.42865e+08	3.01904e+08	3.12986e+08	4.61604e+08	2.59674e+08	2.9346e+08	5.27534e+08	3.40363e+08	4.51335e+08	2832.37	3192.13	3328.66	2847.09	2261.83	3010.03	2795.47	3163.75	3701.46	3613.86	3043.81	3480.63	3686.77	3657.57	3323.15
O35264	Platelet-activating factor acetylhydrolase IB subunit beta OS=Rattus norvegicus GN=Pafah1b2 PE=1 SV=1 - [PA1B2_RAT]	25.5652	6.91094e+08	6.15961e+08	7.26483e+08	9.12935e+08	7.64937e+08	7.76821e+08	8.01765e+08	7.37473e+08	7.78172e+08	5.8908e+08	7.98847e+08	8.4664e+08	8.2245e+08	7.61623e+08	1.06484e+09	1.06435e+09	9.27493e+08	6.80444e+08	8.99509e+08	9.15204e+08	9.12656e+08	7.96095e+08	1.08794e+09	1.05699e+09	7.79936e+08	9.04963e+08	8.72314e+08	8.40237e+08	1.02688e+09	952435452	1.027e+09	9.77074e+08	2826.15	2629.08	2678.19	2444.16	3088.87	2534	2752.25	2905.48	2231.24	2363.38	2772.75	2602.71	2324.16	2570.66	2404.18
P07632	Superoxide dismutase [Cu-Zn] OS=Rattus norvegicus GN=Sod1 PE=1 SV=2 - [SODC_RAT]	15.9018	5.40034e+09	4.26789e+09	5.71386e+09	5.66837e+09	6.09404e+09	4.80169e+09	5.89566e+09	5.76549e+09	6.11308e+09	5.53143e+09	6.62791e+09	6.7015e+09	6755651047	6.23301e+09	6.73047e+09	7.34753e+09	6.72302e+09	6.21753e+09	6.5216e+09	6337061928	7.28298e+09	6.7956e+09	7.79054e+09	7.53959e+09	5.7203e+09	5.90559e+09	6.42887e+09	6.50216e+09	7285691091	7135276609	7.13904e+09	6.40729e+09	2817.44	2810.91	3183.36	2839.72	9319.69	3830.85	9403.2	6725.29	2779.04	2998.76	2976.14	2749.5	4359.23	5521.58	3950.57
P62966	Cellular retinoic acid-binding protein 1 OS=Rattus norvegicus GN=Crabp1 PE=1 SV=3 - [RABP1_RAT]	15.5818	2.54315e+08	4.05253e+08	3.29618e+08	3.88935e+08	2.41118e+08	4.56564e+08	2.49343e+08	2.39588e+08	6.57242e+08	5.51852e+08	5.93374e+08	5.13949e+08	8.10708e+08	5.67216e+08	5.19117e+08	6.55485e+08	8.37089e+08	711488343	1.17679e+09	1.23794e+09	1325289987	1.1681e+09	962620838	1.04904e+09	5.48872e+08	551755130	5.5067e+08	5.08759e+08	4.9322e+08	5.78125e+08	8.09136e+08	9.72436e+08	2801.77	2038.67	2849.61	2299.83	2417.39	1457.16	3066.03	2840.98	2096.43	1967.71	1993.8	2021.67	1709.9	1800.36	2146.48
P55063	Heat shock 70 kDa protein 1-like OS=Rattus norvegicus GN=Hspa1l PE=2 SV=2 - [HS71L_RAT]	70.5052	4474417516	4035637828	5.73109e+09	5.2059e+09	4935644569	4.77561e+09	6.32098e+09	6.55186e+09	5.16692e+09	4.72737e+09	5.70834e+09	5764562864	5.5121e+09	5.35422e+09	6951830017	7.20635e+09	5.71286e+09	5.41076e+09	6.53887e+09	5.86146e+09	6.35059e+09	5.88238e+09	7.26473e+09	7.82326e+09	5.50603e+09	5.45987e+09	7.19318e+09	7124750926	7.1553e+09	7.66055e+09	8.30375e+09	7.46207e+09	2784.82	2350.51	3104.61	2464.01	2389.39	2256.12	2979.97	2666.02	2550.49	2598.85	2574.96	2592.23	2430.58	2803.53	2539.85
P38652	Phosphoglucomutase-1 OS=Rattus norvegicus GN=Pgm1 PE=1 SV=2 - [PGM1_RAT]	61.3646	1.62692e+08	1.45676e+08	1.50825e+08	1.67213e+08	1.7226e+08	1.71659e+08	1.7214e+08	1.94674e+08	138840595	1.61262e+08	1.7205e+08	1.54483e+08	1.60339e+08	161573505	2.44534e+08	2.24368e+08	2.11995e+08	1.86829e+08	2.50275e+08	1.9186e+08	2.61972e+08	1.65531e+08	2.18356e+08	2.52321e+08	1.92041e+08	2.17845e+08	1.97474e+08	2.04075e+08	3.00146e+08	2.37216e+08	2.35398e+08	2.29986e+08	2783.57	2287.18	3080.9	3536.46	3268.92	2706.26	3285.13	3796.37	2011.58	2320.91	2740.22	2964.64	2384.15	2619.9	2466.88
Q9WVK7	Hydroxyacyl-coenzyme A dehydrogenase, mitochondrial OS=Rattus norvegicus GN=Hadh PE=2 SV=1 - [HCDH_RAT]	34.4259	4.12861e+08	6.37839e+08	4.34969e+08	6.50569e+08	5.51485e+08	928395295	5.48108e+08	4.5337e+08	7.71022e+08	5.91793e+08	8.02674e+08	7.85905e+08	8.39845e+08	7.36607e+08	9.46337e+08	1.13573e+09	9.95129e+08	7.07399e+08	1.08804e+09	1.04467e+09	1.37117e+09	9.62844e+08	1.36336e+09	1.32092e+09	1.04479e+09	1.18733e+09	1.02852e+09	1.01767e+09	1.48468e+09	1.16602e+09	1480514306	1.35421e+09	2767.61	3033.75	3110.83	3390.97	2972.43	3050.88	2939.61	3274.48	2791.52	3264.34	2811.35	3561.2	3360.38	3932.36	3524.23
P29410	Adenylate kinase 2, mitochondrial OS=Rattus norvegicus GN=Ak2 PE=2 SV=2 - [KAD2_RAT]	26.3625	5.03977e+08	4.13824e+08	5.74516e+08	549871236	5.91261e+08	5.20359e+08	6.27119e+08	5.51031e+08	795398542	6.85136e+08	868288726	8.70609e+08	8.88028e+08	7.7755e+08	1.08706e+09	1.10895e+09	9.70724e+08	805359587	9.76803e+08	935613152	1.0756e+09	9.48477e+08	1260679674	1.1065e+09	8.35997e+08	8.86979e+08	9.84764e+08	9.57166e+08	1090158441	1.05788e+09	1.11986e+09	1.01073e+09	2764.89	1695.86	2474.29	2182.74	2007.78	1900.21	2713.8	2511.81	2653.69	2748.19	2390.04	2691.59	2756.64	2668.1	3007.21
Q9R1T3	Cathepsin Z OS=Rattus norvegicus GN=Ctsz PE=1 SV=2 - [CATZ_RAT]	34.1724	3.417e+08	2.33686e+08	3.80218e+08	3.39245e+08	4.0831e+08	2.6439e+08	4.70228e+08	5.07064e+08	3.37801e+08	3.03292e+08	4.07376e+08	4.10242e+08	3.81986e+08	3.43196e+08	4.62799e+08	515764567	4.32191e+08	3.86168e+08	5.03185e+08	4.41646e+08	4.71542e+08	4.39434e+08	5.56386e+08	4.95409e+08	3.61415e+08	3.59849e+08	4.31986e+08	4.53059e+08	4.6804e+08	4.87957e+08	4.91116e+08	4.14891e+08	2763.05	2203.34	2653.9	2274.5	2725.56	1880.23	3222.07	3047.09	2197.51	2191.25	2425	2227.58	2586.07	2514.12	2686.07
P50123	Glutamyl aminopeptidase OS=Rattus norvegicus OX=10116 GN=Enpep PE=1 SV=2 - [AMPE_RAT]	107.927	2.83641e+08	6.79212e+08	195960597	6.20252e+08	535751201	8.99421e+08	2.14181e+08	4.89354e+08	5.02056e+08	6.86446e+08	7.66183e+08	5.06353e+08	8.40518e+08	6.1857e+08	5.57371e+08	985038679	5.7077e+08	7.23029e+09	9.02557e+08	6.299e+08	6.38899e+08	1.26954e+10	7.34028e+08	2.96741e+08	1.3268e+10	9.0237e+08	7.32395e+08	6.67641e+08	6.2904e+08	9.44061e+08	6.00146e+08	872200361	2739.56	2926.67	3786.73	3002.4	2295.09	2583.32	3001.39	3095.81	2118.47	2303.83	2291.32	2373.49	2002	2026.37	2092.68
Q63425	Periaxin OS=Rattus norvegicus GN=Prx PE=1 SV=2 - [PRAX_RAT]	146.309	1.4718e+08	1.64106e+08	1.99588e+08	1.73697e+08	1.64755e+08	2.38365e+08	1.64375e+08	1.46835e+08	7.8867e+07	1.5629e+08	1.35289e+08	1.40072e+07	1.67212e+07	4.96558e+07	1.37356e+08	140136455	1.57035e+07	7.1958e+07	8.2343e+07	1.0491e+07	101689641	4.79921e+06	0	256007125	0	0	8.44921e+07	74597496	2.13452e+08	1.05563e+08	0	0	2723.23	2622.21	2617.3	2628.15	2312.65	2711.23	2625.39	2689.16	136.878	125.768	169.623	121.76	42.3882	80.6971	29.12
Q9ESW0	DNA damage-binding protein 1 OS=Rattus norvegicus GN=Ddb1 PE=2 SV=1 - [DDB1_RAT]	126.781	1.62472e+08	1.80173e+08	2.11749e+08	2.27675e+08	2.21439e+08	2.10304e+08	2.11044e+08	2.33199e+08	2.00198e+08	1.7466e+08	2.02822e+08	2.04618e+08	2.26186e+08	1.72135e+08	2.43555e+08	2.45863e+08	2.36144e+08	1.75968e+08	6.20399e+08	2.09138e+08	2.38751e+08	1.89848e+08	2.68347e+08	2.71246e+08	2.3269e+08	2.26407e+08	2.40999e+08	2.32935e+08	2.77524e+08	2.7679e+08	2.99986e+08	2.76549e+08	2717.26	1927.18	2688.88	2695.36	2714.38	1828.22	2777.72	2917.74	1674.69	1910.86	1862.2	2238.69	1915.72	1996.48	2199.24
Q6P6T4	Echinoderm microtubule-associated protein-like 2 OS=Rattus norvegicus GN=Eml2 PE=1 SV=1 - [EMAL2_RAT]	70.6662	1.49393e+08	1.43446e+08	1.99143e+08	1.9228e+08	186784327	1.67339e+08	2.00142e+08	1.53987e+08	1.63742e+08	1.58306e+08	175782254	1.85303e+08	1.69784e+08	151051582	2.11151e+08	2.16866e+08	199917303	1.768e+08	1.9983e+08	1.9328e+08	2.10767e+08	1.62187e+08	2.23386e+08	2.24808e+08	2.14615e+08	2.25505e+08	2.50224e+08	2.19778e+08	277251998	2.92266e+08	3.01525e+08	2.78917e+08	2711.87	1277.95	2117.86	1633.59	1692.38	1202.54	2592.31	2468.15	1135.6	1552.17	1304.9	1436.95	1158.16	1534.94	1546.45
Q66H12	Alpha-N-acetylgalactosaminidase OS=Rattus norvegicus GN=Naga PE=2 SV=1 - [NAGAB_RAT]	46.8405	1.90459e+08	2.22625e+08	2.28975e+08	2.79808e+08	2.46967e+08	2.80841e+08	2.53494e+08	3.02493e+08	2.84908e+08	2.45189e+08	2.76343e+08	2.95277e+08	3.32372e+08	2.95099e+08	4.16001e+08	479521608	3.28584e+08	3.06016e+08	4.00954e+08	395582317	4.58536e+08	3.6139e+08	5.18899e+08	5.14039e+08	3.22472e+08	3.60866e+08	3.36849e+08	377631310	4.9089e+08	4.32672e+08	526249092	5.11346e+08	2708.83	2594.42	2556.17	2492.41	2383.91	2275.95	2955.27	2988.66	2399.44	2547.8	2402.73	2520.49	2482.3	2542.26	2826.66
P84079	ADP-ribosylation factor 1 OS=Rattus norvegicus GN=Arf1 PE=1 SV=2 - [ARF1_RAT]	20.6837	4.83497e+08	9.25395e+08	6.03644e+08	964536451	6.27896e+08	1.13944e+09	6.19136e+08	5.43196e+08	1.13333e+09	1.13516e+09	1.16456e+09	1.08683e+09	1.20606e+09	1.05443e+09	1.07127e+09	1.3812e+09	1.7082e+09	1.2832e+09	1.76334e+09	1.68881e+09	1.99037e+09	1.68201e+09	1.74505e+09	2.03545e+09	1.27227e+09	1.43157e+09	1.17503e+09	1.32132e+09	1.3304e+09	1.45773e+09	1.66808e+09	1.69472e+09	2659.14	3091.01	2543.11	2937.22	2386.2	2991.14	2419.21	2591.27	3420.64	3530.59	3274.69	3062.97	3397.8	3001.15	3000.74
P47820	Angiotensin-converting enzyme OS=Rattus norvegicus OX=10116 GN=Ace PE=1 SV=1 - [ACE_RAT]	150.812	9.83326e+07	1.78371e+08	1.40773e+08	1.85724e+08	1.45367e+08	2.32825e+08	1.69299e+08	1.33239e+08	4.22265e+07	2.62257e+07	3.01839e+07	2.92455e+07	3.21665e+07	2.66301e+07	4.73655e+07	5.40759e+07	2.79406e+07	6.40794e+07	3.57568e+07	4.70132e+07	3.32102e+07	4.29367e+07	3.22358e+07	3.61239e+07	4.1525e+07	4.73959e+07	4.4476e+07	4.87e+07	6.35016e+07	8.53299e+07	1.76009e+08	4.05529e+07	2656.46	3270.75	3315.38	3090.23	2819.39	2751.2	3658.36	3455	315.466	278.924	230.158	231.975	216.004	209.284	181.895
P11232	Thioredoxin OS=Rattus norvegicus GN=Txn PE=1 SV=2 - [THIO_RAT]	11.6657	3.01165e+09	2.489e+09	2.5199e+09	2.72074e+09	3.18455e+09	2.30563e+09	2.26951e+09	2957559815	4.36566e+09	4.24401e+09	3.74316e+09	4.26525e+09	4121432856	3.66613e+09	4.21597e+09	4990304775	4.93072e+09	4.57028e+09	3.58108e+09	4.30929e+09	4.80819e+09	4001168251	5.12121e+09	4.37054e+09	4.08859e+09	3.99503e+09	4.28847e+09	3.89665e+09	4.73647e+09	5.02857e+09	3.90923e+09	4309815947	2652.53	2565.28	2285.02	2344.33	2501.71	2312.79	2044.57	3014.39	3617.96	3888.97	3709.02	3241.37	3147.88	3323.84	3156.51
P70645	Bleomycin hydrolase OS=Rattus norvegicus GN=Blmh PE=1 SV=1 - [BLMH_RAT]	52.2888	2.77186e+08	3.01851e+08	376160341	370715451	2.88112e+08	398539633	3.03912e+08	3.83024e+08	2.9145e+08	3.33913e+08	3.36015e+08	3.62304e+08	3.13575e+08	2.81434e+08	3.39314e+08	4.60826e+08	3.95286e+08	3.44082e+08	5.2201e+08	4.76849e+08	4.42883e+08	3.98018e+08	492494559	499396296	3.74491e+08	4.29593e+08	4.51952e+08	4.26808e+08	4.94858e+08	4.95349e+08	4.72645e+08	4.21404e+08	2648.07	2658.03	3308.52	2976.04	2688.7	2725.57	3275.92	3467.08	2129.5	2463.74	2674.27	2084.4	2991.28	2609.96	2471.38
Q71UF4	Histone-binding protein RBBP7 OS=Rattus norvegicus GN=Rbbp7 PE=2 SV=1 - [RBBP7_RAT]	47.7902	1.96382e+08	2.63696e+08	3.41142e+08	3.6522e+08	3.20152e+08	3.01693e+08	3.42992e+08	405465916	3.31586e+08	2.8924e+08	3.48365e+08	3.55636e+08	3.75151e+08	3.4196e+08	3.90507e+08	4.63907e+08	3.76473e+08	357863197	450542819	4.12144e+08	4.99822e+08	4.00854e+08	4.66318e+08	4.96566e+08	329517822	3.68941e+08	3.56519e+08	3.49426e+08	429527940	4.135e+08	4.44362e+08	4.40031e+08	2584.46	1880.27	2640.69	1849.57	2253.87	1857.84	2697.89	2445.35	2367.09	2075.18	2164.73	2050.34	2256.88	2209.85	2201.57
P00388	NADPH--cytochrome P450 reductase OS=Rattus norvegicus GN=Por PE=1 SV=3 - [NCPR_RAT]	76.9142	1.45395e+08	1.23219e+08	1.70377e+08	1.54118e+08	1.61542e+08	1.97281e+08	2.13527e+08	1.98875e+08	1.65908e+08	1.72006e+08	2.02204e+08	1.90199e+08	2.31252e+08	1.61437e+08	229556420	2.46058e+08	2.15087e+08	1.91739e+08	2.12497e+08	2.4346e+08	2.76991e+08	1.77331e+08	3.34095e+08	2.34192e+08	2.18073e+08	2.34612e+08	2.51055e+08	2.40046e+08	3.03929e+08	3.09753e+08	2.64249e+08	2.57392e+08	2582.47	1166.9	2293.75	1948.48	1801.14	1448.18	2583.08	2334.87	1353.26	1585.08	1710.71	1903.47	1281.7	1501.01	1879.44
P13084	Nucleophosmin OS=Rattus norvegicus GN=Npm1 PE=1 SV=1 - [NPM_RAT]	32.5398	6.73599e+08	5.79964e+08	6.48121e+08	8.00745e+08	936250859	8.38801e+08	8.25609e+08	8.12928e+08	1.1703e+09	9.1719e+08	1.2703e+09	1.20766e+09	1.27934e+09	1191523813	1.42746e+09	1.34892e+09	1.44321e+09	1.15852e+09	1.37122e+09	1.11791e+09	1.3938e+09	1.20257e+09	1.57226e+09	1.4697e+09	1.27641e+09	1.33537e+09	1.38305e+09	1.36592e+09	1.71524e+09	1682137313	1.44334e+09	1.41212e+09	2582.23	1847.36	2234.9	2617.63	2758.54	2463.25	2713.77	2698.65	2876.86	2535.09	2832.85	3030.06	3002.48	3039.25	3316.42
B2RYG6	Ubiquitin thioesterase OTUB1 OS=Rattus norvegicus GN=Otub1 PE=1 SV=1 - [OTUB1_RAT]	31.2504	2.31498e+08	225719456	2.68124e+08	3.00272e+08	2.56206e+08	3.08988e+08	3.08262e+08	3.09234e+08	2.79823e+08	2.66831e+08	2.64348e+08	2.97116e+08	2.86065e+08	2.61231e+08	3.33207e+08	4.22924e+08	3.1414e+08	2.74046e+08	2.94992e+08	3.07974e+08	3.68137e+08	2.8565e+08	3.85814e+08	4.04835e+08	2.46887e+08	3.07429e+08	3.0261e+08	2.56082e+08	3.71632e+08	3.31034e+08	311884334	321481485	2582.17	2067.36	2809.52	2670.43	2406.24	2465.45	2566.77	3261.35	2121.76	2611.19	1920.18	2368.5	2228.1	2252.39	2116.01
Q8CFN2	Cell division control protein 42 homolog OS=Rattus norvegicus GN=Cdc42 PE=1 SV=2 - [CDC42_RAT]	21.245	5.15853e+08	6.6188e+08	6.27986e+08	8.16068e+08	6.48075e+08	9.10394e+08	7.08723e+08	7.34949e+08	9.47215e+08	6.73477e+08	9.99401e+08	9.64266e+08	1.12331e+09	9.3401e+08	1.17731e+09	1.27418e+09	1.2635e+09	8.25182e+08	1.17857e+09	1.10837e+09	1.23695e+09	1.1903e+09	1.36108e+09	1.65666e+09	8.3441e+08	1.02726e+09	9.32667e+08	9.14839e+08	1.0942e+09	1.13162e+09	1.17056e+09	1.10398e+09	2581.6	2798.73	3137.51	2768.37	2923.98	2928.47	2816.06	3245.22	2621.15	2857.02	2768.93	2799.72	2867.79	2711.59	2827.19
P00507	Aspartate aminotransferase, mitochondrial OS=Rattus norvegicus GN=Got2 PE=1 SV=2 - [AATM_RAT]	47.2841	2.68188e+08	3.59472e+08	3.96759e+08	4.18739e+08	1.8918e+08	4.35107e+08	3.88677e+08	2.28056e+08	4.18035e+08	3.71456e+08	405466018	4.65108e+08	4.65447e+08	4.00604e+08	494115871	580714287	494330085	2.75793e+08	5.53057e+08	511488979	6.2866e+08	5.04738e+08	6.33026e+08	6.78277e+08	582754063	6.55446e+08	6.74707e+08	5.83353e+08	740183753	6.68119e+08	8.00854e+08	7.83079e+08	2579.63	2180.11	2650.86	2103.54	1325.17	1665.94	2797.46	2066.25	2328.26	2368.53	2210.7	2731.01	2451.45	2223.64	2537.14
Q6DGG0	Peptidyl-prolyl cis-trans isomerase D OS=Rattus norvegicus GN=Ppid PE=1 SV=3 - [PPID_RAT]	40.7398	3.44172e+08	3.34333e+08	4.01544e+08	422387501	3.42051e+08	3.95098e+08	3.97451e+08	411052929	402522659	3.80006e+08	3.91802e+08	393721772	3.95253e+08	3.80482e+08	4.37966e+08	492971055	4.28002e+08	3.45949e+08	419391259	3.81207e+08	4.87444e+08	3.99694e+08	513358875	5.17101e+08	4.06139e+08	4.72787e+08	4.16374e+08	3.98527e+08	4.932e+08	4.67777e+08	4.59207e+08	5.27774e+08	2560.32	1555.65	2746.29	2191.71	2288.78	1659.54	2421.3	2335.85	1619.42	1574.26	1520.59	1776.34	1552.07	1656.99	1757.01
Q4KMA2	UV excision repair protein RAD23 homolog B OS=Rattus norvegicus GN=Rad23b PE=1 SV=1 - [RD23B_RAT]	43.4698	1.31351e+09	4.78915e+08	1.10987e+09	5.96218e+08	1.99561e+09	5.19825e+08	9.63456e+08	9.6122e+08	6.58932e+08	5.7206e+08	1.13442e+09	692758541	6.20415e+08	1.04142e+09	1.14405e+09	7.54207e+08	1.17089e+09	6.71222e+08	9.62439e+08	951105470	8.8335e+08	8.08597e+08	1161670885	7.37888e+08	9.62059e+08	9.69936e+08	8.47451e+08	5.25008e+08	1.07417e+09	1.15191e+09	1.07572e+09	8.45809e+08	2555.18	1783.76	2275.1	2075.09	2186.28	2094.49	2219.43	2479.7	2414.03	2055.63	2057.5	2339.8	2177.79	2060.06	2270.09
Q9WVH8	Fibulin-5 OS=Rattus norvegicus OX=10116 GN=Fbln5 PE=2 SV=1 - [FBLN5_RAT]	50.1267	2.74774e+08	3.927e+08	3.4217e+08	4.83968e+08	3.98768e+08	6.24001e+08	3.62599e+08	3.71824e+08	4.00103e+08	3.32509e+08	328046555	3.9107e+08	4.916e+08	4.30575e+08	4.04541e+08	5.36903e+08	6.17262e+08	464730311	7.03206e+08	6.73697e+08	7.82195e+08	6.66728e+08	693863133	7.96256e+08	4.2411e+08	4.82944e+08	4.00101e+08	3.97045e+08	5.08158e+08	5.40506e+08	6.30471e+08	6.21968e+08	2554.01	2702.53	2228.93	2518.61	2326.25	2772.24	2455.93	2588.71	2211.06	2353.46	2253.95	2146.78	2490.64	2420.65	2470.99
P04182	Ornithine aminotransferase, mitochondrial OS=Rattus norvegicus GN=Oat PE=1 SV=1 - [OAT_RAT]	48.302	1.66981e+08	1.37717e+08	1.8166e+08	1.88301e+08	1.70746e+08	1.58449e+08	1.85542e+08	1.81884e+08	6.86886e+08	5.16088e+08	7.054e+08	6.93506e+08	7.46546e+08	6.99316e+08	9.27368e+08	8.55613e+08	9.53314e+08	6.55412e+08	9.32649e+08	7.5941e+08	9.0289e+08	8.18932e+08	1.13518e+09	1.07208e+09	8.68192e+08	9.90346e+08	9.67673e+08	7.89297e+08	1.12366e+09	1.01467e+09	1.09813e+09	9.26586e+08	2532.18	1252.21	2470.38	1799.67	1583.07	1262.69	2633.43	2376.72	4344.35	4738.54	4897.21	5181.08	4496.4	4106.66	4930.75
P41498	Low molecular weight phosphotyrosine protein phosphatase OS=Rattus norvegicus GN=Acp1 PE=1 SV=3 - [PPAC_RAT]	18.1398	3.66714e+08	337776274	3.69123e+08	3.47669e+08	4.44228e+08	3.12139e+08	3.02023e+08	3.72159e+08	4.00589e+08	3.79669e+08	3.51584e+08	3.96841e+08	3.84055e+08	3.40354e+08	4.39214e+08	476820055	421335227	3.7156e+08	3.75222e+08	3.84546e+08	433840338	3.92048e+08	5.01251e+08	4.47186e+08	3.84336e+08	3.8646e+08	4.40781e+08	3.80023e+08	4.57935e+08	4.95967e+08	416473780	4.49071e+08	2531.23	1765.38	1497.39	1628.3	2216.22	1458.97	1682.64	2163	1198.16	1530.45	1333.91	1237.22	1682.15	1752.14	1808.29
F1LQ48	Heterogeneous nuclear ribonucleoprotein L OS=Rattus norvegicus GN=Hnrnpl PE=1 SV=2 - [HNRPL_RAT]	67.8603	2.19549e+08	3.76563e+08	3.26741e+08	4.59403e+08	3.2839e+08	5.63125e+08	3.24542e+08	3.14066e+08	4.27958e+08	3.89943e+08	4.58883e+08	390044536	5.57252e+08	4.66085e+08	4.5363e+08	5.00537e+08	6.21102e+08	5.22644e+08	877704437	731845970	9.56939e+08	7.7449e+08	6.23652e+08	7.19881e+08	4.74867e+08	483995354	4.55064e+08	5.07474e+08	4.9897e+08	5.40732e+08	7.05175e+08	7.37223e+08	2530.03	3900.86	3600.86	3853.15	2882.6	4355.73	3165.18	2968.78	4145.42	3652.74	3883.45	3767.07	4398.72	4290.49	3372.35
P61206	ADP-ribosylation factor 3 OS=Rattus norvegicus GN=Arf3 PE=1 SV=2 - [ARF3_RAT]	20.5877	4.83497e+08	9.25395e+08	6.03644e+08	964536451	6.27896e+08	1.13944e+09	9.88953e+08	5.43196e+08	1.13333e+09	1691046108	1.16456e+09	1.08683e+09	1.20606e+09	1.05443e+09	1.07127e+09	1.3812e+09	1.7082e+09	1.2832e+09	2.20442e+09	1.68881e+09	1.99037e+09	1.68201e+09	1.74505e+09	2.03545e+09	1.27227e+09	1.43157e+09	1.17503e+09	1.32132e+09	1.3304e+09	1.45773e+09	1.66808e+09	1.69472e+09	2505.87	2930.65	2399.05	2771.91	2173.49	2842.19	2234.64	2453.34	3226.16	3319.47	3066.87	2939.03	3228.9	2920.74	2928.65
P38983	40S ribosomal protein SA OS=Rattus norvegicus GN=Rpsa PE=1 SV=3 - [RSSA_RAT]	32.8034	8.34114e+08	1.65818e+09	9.36229e+08	1.59397e+09	1.06387e+09	2.19692e+09	1.105e+09	1.01198e+09	1.25998e+09	1.14258e+09	1.35639e+09	1.40711e+09	1.50982e+09	1.41015e+09	1725824109	1.85013e+09	1.62189e+09	1.34433e+09	1.61878e+09	1.57793e+09	1.78243e+09	1.58513e+09	1.92595e+09	2.14401e+09	1.07364e+09	1237653685	1.28095e+09	1.34738e+09	1366005040	1339684556	1.63881e+09	1540875669	2502.62	2031.43	2709.62	2318.37	2196.32	1916	2755.39	2749.62	2404.47	2660.95	2802.74	2580.08	2340.78	2558.98	2752.15
P38656	Lupus La protein homolog OS=Rattus norvegicus GN=Ssb PE=2 SV=1 - [LA_RAT]	47.7479	3.17921e+08	343878225	3.96919e+08	4.04806e+08	4.40185e+08	4.36217e+08	4.02028e+08	3.88174e+08	4.48768e+08	3.64125e+08	4.37734e+08	4.47313e+08	493622634	4.46631e+08	5.40431e+08	6.12932e+08	5.12364e+08	3.80079e+08	5.17441e+08	5.3506e+08	5.83506e+08	5.0956e+08	6.28099e+08	6.57458e+08	4.45898e+08	4.63808e+08	4.49535e+08	4.51177e+08	5.59894e+08	4.95588e+08	6.2781e+08	5.69406e+08	2492.87	2129.94	2818.53	2465.41	2612.07	2229.29	2754.15	2534.59	2454.36	2712.47	2422.12	2716.45	2567.66	2759.1	2942.31
Q63945	Protein SET OS=Rattus norvegicus GN=Set PE=2 SV=2 - [SET_RAT]	33.3857	1.37135e+09	1.2189e+09	1.21287e+09	1.25606e+09	1.84025e+09	1.39158e+09	1.12279e+09	1.17675e+09	1.45421e+09	1.27651e+09	1.21514e+09	1.32e+09	1.56938e+09	1.38726e+09	1.4269e+09	1.62127e+09	2.05556e+09	1.61596e+09	1.74935e+09	1.6104e+09	2.27878e+09	1.76432e+09	2.05124e+09	1714338503	1.70883e+09	1.88661e+09	1.6653e+09	1.51555e+09	2.44537e+09	2.19871e+09	1.6597e+09	1.79744e+09	2477.92	1990.43	2465.13	2276.39	2755.37	2087.25	2361.87	2323.54	2260.14	2217.3	2111.5	2046.99	1944.92	1983.27	2053.03
O35828	Coronin-7 OS=Rattus norvegicus GN=Coro7 PE=2 SV=2 - [CORO7_RAT]	100.719	1.55446e+08	1.52656e+08	1.7135e+08	2.32732e+08	1.19522e+08	1.58046e+08	1.93391e+08	1.70262e+08	1.13739e+08	1.01824e+08	1.26074e+08	1.2293e+08	116524421	8.92576e+07	1.59031e+08	1.55129e+08	1.43678e+08	1.09149e+08	1.59437e+08	1.3732e+08	1.49923e+08	2.09204e+08	1.77413e+08	4.57137e+08	1.37402e+08	1.56463e+08	2.02895e+08	2.19631e+08	2.62905e+08	2.51499e+08	2.68691e+08	2.40119e+08	2474.85	1672.43	2380.73	1995.69	1352.44	1563.48	2930.1	2497.63	862.568	1018.36	954.642	893.423	959.616	897.44	1093.51
P35565	Calnexin OS=Rattus norvegicus OX=10116 GN=Canx PE=1 SV=1 - [CALX_RAT]	67.2126	2.23565e+08	4.6993e+08	2.88062e+08	4.17944e+08	3.21063e+08	6.04333e+08	3.03038e+08	3.32152e+08	5.07229e+08	4.90342e+08	466175624	4.63977e+08	5.6726e+08	5.52778e+08	5.4689e+08	6.31649e+08	6.57069e+08	5.53312e+08	7.99438e+08	6.68389e+08	8.08578e+08	6.25283e+08	742786567	8.794e+08	4.88719e+08	6.22537e+08	4.96279e+08	4.44861e+08	5.91462e+08	5.85181e+08	6.78562e+08	6.31752e+08	2459.59	3948.18	2951.78	3915.95	2669.98	4213.38	2684.12	2461.64	4044.89	3868.38	4162.27	3790.72	4167.38	3520.92	3826.63
Q66HD3	Nuclear autoantigenic sperm protein OS=Rattus norvegicus GN=Nasp PE=1 SV=1 - [NASP_RAT]	84.1486	1.82883e+08	1.61367e+08	1.9413e+08	2.16359e+08	2.21011e+08	2.17376e+08	2.08998e+08	2.1421e+08	2.56025e+08	2.29929e+08	2.74119e+08	2.72797e+08	2.54151e+08	2.15872e+08	3.52648e+08	3.99962e+08	3.35382e+08	2.49189e+08	3.17768e+08	2.78185e+08	3.32167e+08	2.36846e+08	3.7838e+08	3.59281e+08	2.00609e+08	2.37939e+08	2.22339e+08	2.00972e+08	3.10415e+08	2.65942e+08	2.99432e+08	2.45602e+08	2458.43	1337.17	2348.28	1612.36	1936.26	1034.68	2035.91	2578.62	1758.94	1673.24	1813.01	1865.32	1386.42	1356.76	1740.64
Q5RKI1	Eukaryotic initiation factor 4A-II OS=Rattus norvegicus GN=Eif4a2 PE=1 SV=1 - [IF4A2_RAT]	46.3728	3.05804e+08	6.46004e+08	4.80786e+08	8.29051e+08	473786607	9.66365e+08	438137579	4.05981e+08	9.24508e+08	8.95241e+08	9.56721e+08	9.00352e+08	1.18792e+09	1.00705e+09	9.58646e+08	1.25076e+09	1.00446e+09	737092614	1.24978e+09	1.28635e+09	1.42654e+09	1.24457e+09	1.28631e+09	1.51952e+09	8.69277e+08	9.14285e+08	6.99954e+08	8.11396e+08	8.1906e+08	7.99921e+08	1.18451e+09	1.14951e+09	2437.36	3936.98	3354.63	3706.47	3200.07	4162.44	2957.87	2859.01	4176.81	3581.5	3950.81	3561.44	3869.55	3676.76	3219.12
P84082	ADP-ribosylation factor 2 OS=Rattus norvegicus GN=Arf2 PE=2 SV=1 - [ARF2_RAT]	20.7328	4.76523e+08	9.07017e+08	6.01987e+08	9.29362e+08	6.27896e+08	1.06323e+09	6.19136e+08	5.26047e+08	1.13333e+09	1.13516e+09	1.16456e+09	1.08683e+09	1.20606e+09	1.05443e+09	1.07127e+09	1.3812e+09	1.7082e+09	1.2832e+09	1.76334e+09	1.68881e+09	1.99037e+09	1.68201e+09	1.74505e+09	2.03545e+09	1.27227e+09	1.43157e+09	1.17503e+09	1.32132e+09	1.3304e+09	1.45773e+09	1.66808e+09	1.69472e+09	2422.92	2710.22	2288.78	2549.26	2061.81	2721.16	2096.33	2273.43	2937.34	2986.03	2713.9	2733.47	2973.29	2679.5	2749.4
P17764	Acetyl-CoA acetyltransferase, mitochondrial OS=Rattus norvegicus GN=Acat1 PE=1 SV=1 - [THIL_RAT]	44.6664	2.16803e+08	2.94006e+08	2.77588e+08	3.42907e+08	266752156	3.72867e+08	2.85718e+08	2.6143e+08	6.03734e+08	5.62781e+08	5.79618e+08	6.26105e+08	6.06154e+08	5.39565e+08	6.25012e+08	7.19831e+08	6.50703e+08	5.80992e+08	6.43073e+08	6.29121e+08	6.93003e+08	6.11472e+08	7.43608e+08	8.28751e+08	5.08329e+08	6.41888e+08	5.52103e+08	5.16539e+08	6.14572e+08	6.05708e+08	6.97579e+08	6.2984e+08	2417.37	1871.1	2203.62	2323.99	1810.78	1775.66	1938.59	1932.98	2721.02	3083.36	2803.42	3257.25	2705.52	2895.22	2784.95
Q04462	Valine--tRNA ligase OS=Rattus norvegicus GN=Vars PE=2 SV=2 - [SYVC_RAT]	140.28	1.14027e+08	1.34107e+08	1.28327e+08	1.63903e+08	1.34615e+08	1.51859e+08	1.41754e+08	1.59928e+08	1.55973e+08	1.26453e+08	1.55471e+08	1.48717e+08	1.63711e+08	1.47278e+08	1.94092e+08	2.05801e+08	1.57489e+08	128204228	1.58765e+08	1.49082e+08	1.77583e+08	1.55631e+08	1.89275e+08	1.88789e+08	1.71064e+08	1.77594e+08	1.9392e+08	1.66646e+08	2.2266e+08	2.09841e+08	2.24718e+08	2.06618e+08	2409.36	2227.22	3138.4	2570.87	2546.17	1804.84	3275.83	3395.62	1959.79	2242.65	2160.17	2148.22	2456.52	2429.42	2618.18
Q8K3K9	GTPase IMAP family member 4 OS=Rattus norvegicus OX=10116 GN=Gimap4 PE=1 SV=1 - [GIMA4_RAT]	35.8003	3.63134e+08	3.28012e+08	3.51204e+08	4.3566e+08	4.27065e+08	4.64817e+08	4.17872e+08	3.45843e+08	3.76995e+07	5.33655e+07	9.1388e+07	1.02168e+08	6.16406e+07	6.87424e+07	6.22445e+07	8.86409e+07	8.29283e+07	4.7201e+07	6.39285e+07	6.56084e+07	8.67565e+07	6.08978e+07	4.60399e+07	7.66721e+07	7.42904e+07	6.72454e+07	8.73121e+07	6.58699e+07	1.03875e+08	7.83346e+07	6.52897e+07	8.71272e+07	2393.93	1863.45	2008.04	1977.61	1497.14	1338.71	1755.05	2005.55	301.563	426.828	473.401	243.97	223.4	212.473	284.712
Q3MIE4	Synaptic vesicle membrane protein VAT-1 homolog OS=Rattus norvegicus GN=Vat1 PE=1 SV=1 - [VAT1_RAT]	43.091	2.2037e+10	1.43503e+10	16823531251	2.21278e+10	20156178382	2.05247e+10	1.63592e+10	1.92634e+10	2.2277e+10	2.17765e+10	2.21456e+10	2.59322e+10	2.84744e+10	3.06083e+10	30734462291	3.18894e+10	2.88681e+10	2.57143e+10	3.90554e+10	2.94962e+10	2.28676e+10	2.12242e+10	3.99068e+10	4.45285e+10	2.53629e+10	30485255675	3.42137e+10	2.11625e+10	3.63378e+10	34272659174	44809088988	3.8181e+10	2393.3	3521.8	2350.35	3284.82	2085.67	3546.64	1832.56	2574.39	2397.74	2580.45	2183.13	2277.86	2561.96	3018.63	2174.07
Q91ZN1	Coronin-1A OS=Rattus norvegicus GN=Coro1a PE=1 SV=3 - [COR1A_RAT]	51.033	298291582	2.93337e+08	3.45552e+08	4.26473e+08	3.40201e+08	4.35795e+08	4.46742e+08	4.70739e+08	2.11277e+08	1.80677e+08	2.12603e+08	1.99006e+08	2.56763e+08	2.31569e+08	3.36859e+08	3.56671e+08	2.90318e+08	2.21139e+08	2.9148e+08	2.58066e+08	3.57196e+08	3.04089e+08	4.19186e+08	3.8266e+08	2.67074e+08	3.12577e+08	3.00689e+08	2.94609e+08	4.23196e+08	3.73335e+08	4.04086e+08	3.42867e+08	2388.86	1567.7	2662.71	2089.35	2082.93	1574.89	3243.79	3120.04	1091.91	1186.39	1522.99	1635.53	1034.04	1271.79	1429.57
P42930	Heat shock protein beta-1 OS=Rattus norvegicus GN=Hspb1 PE=1 SV=1 - [HSPB1_RAT]	22.8786	4.0256e+08	6.63287e+08	5.09695e+08	6.67229e+08	4.63693e+08	883692151	4.80197e+08	4.21521e+08	1.37615e+09	1.15361e+09	1.21745e+09	1.2091e+09	1.39396e+09	1.31934e+09	1.14549e+09	1.487e+09	1.68469e+09	1.4442e+09	1.5888e+09	1790747218	2.1244e+09	1.78989e+09	1.7201e+09	2.11445e+09	1.21393e+09	1.33351e+09	1.08566e+09	1.08663e+09	1.3237e+09	1244444213	1.55162e+09	1.38705e+09	2375.08	3045.58	2293.15	2828.42	2212.97	2735.03	2219.29	2114.58	3684.86	3413.71	3671.83	3428.4	3296.13	3577	3503.74
Q5XIE0	Acidic leucine-rich nuclear phosphoprotein 32 family member E OS=Rattus norvegicus GN=Anp32e PE=2 SV=1 - [AN32E_RAT]	29.4003	4.15241e+08	3.02132e+08	4.2718e+08	3.42213e+08	4.50641e+08	2.88111e+08	2.72663e+08	3.63632e+08	3.68372e+08	3.33358e+08	3.06563e+08	3.23881e+08	3.35485e+08	2.75225e+08	3.54143e+08	4.2105e+08	4.61037e+08	377366593	3.53128e+08	3.94822e+08	401147180	3.15072e+08	440595146	300953516	3.61174e+08	3.93772e+08	3.67065e+08	2.93819e+08	360216590	3.77063e+08	3.1934e+08	3.10707e+08	2369.43	1491.8	1716.85	1355.9	1569.04	1065.64	1237.21	1452.89	1635.26	1608.89	1101.61	1238.4	1285.16	1382.63	1185.46
Q9EPF2	Cell surface glycoprotein MUC18 OS=Rattus norvegicus OX=10116 GN=Mcam PE=1 SV=2 - [MUC18_RAT]	71.2822	2.32525e+08	4.29445e+08	2.68327e+08	4.15298e+08	2.97321e+08	5.99566e+08	2.47691e+08	2.55172e+08	274083331	2.38446e+08	2.37772e+08	3.08523e+08	3.56478e+08	3.0709e+08	2.78763e+08	3.47157e+08	3.55476e+08	2.66343e+08	375879512	3.79689e+08	4.19839e+08	3.60506e+08	3.69538e+08	4.65451e+08	3.31586e+08	3.74063e+08	2.88462e+08	3.231e+08	3.41418e+08	3.64732e+08	4.0598e+08	4.12502e+08	2367.11	3385.45	2502.63	3259.13	2277.74	3895.95	2696.89	2888.2	2124	1825.45	1530.07	2142.5	2654.94	2285.87	2016.24
P85971	6-phosphogluconolactonase OS=Rattus norvegicus GN=Pgls PE=1 SV=1 - [6PGL_RAT]	27.2173	1.9008e+08	1.62766e+08	2.10482e+08	2.68827e+08	2.05536e+08	2.55388e+08	2.70632e+08	2.19409e+08	2.98685e+08	2.25408e+08	3.30308e+08	2.99233e+08	2.94021e+08	2.70718e+08	4.00748e+08	4.31439e+08	3.61976e+08	2.53504e+08	3.52661e+08	3.66667e+08	4.33635e+08	3.178e+08	4.8942e+08	4.93375e+08	2.43907e+08	2.99681e+08	2.93565e+08	2.77327e+08	3.95915e+08	3.40473e+08	3.4889e+08	2.98584e+08	2362.3	1659.67	1972.72	2323.7	2290.67	2215.85	2211.4	2349.83	2301.1	2074.45	2062	2311.56	2274.32	2416.44	2574.37
B0BNA5	Coactosin-like protein OS=Rattus norvegicus GN=Cotl1 PE=1 SV=1 - [COTL1_RAT]	15.922	1.55025e+09	1025246574	1.68348e+09	1.4827e+09	1.7251e+09	1.05074e+09	1.92545e+09	1972498500	1.2508e+09	1.13128e+09	1.18142e+09	1.28099e+09	1.25233e+09	1.15683e+09	1.46314e+09	1.56897e+09	1.47595e+09	1.45509e+09	1.50605e+09	1.47923e+09	1.45684e+09	1.29869e+09	1.64989e+09	1.60493e+09	1223483273	1.26573e+09	1.35943e+09	1.34386e+09	1561844283	1.45987e+09	1.57019e+09	1.43138e+09	2346.65	2094.27	2972.21	2736.14	2476.02	1954.58	2885.93	2957.03	2168.69	2255.87	2414.76	2218.29	1971.39	1882.58	2324.99
Q9Z2Q1	Protein transport protein Sec31A OS=Rattus norvegicus GN=Sec31a PE=1 SV=2 - [SC31A_RAT]	135.187	9.18384e+07	1.15331e+08	121911022	1.37507e+08	1.247e+08	1.75398e+08	1.09213e+08	1.09608e+08	1.53709e+08	1.53261e+08	1.62041e+08	1.93934e+08	1.88431e+08	1.81812e+08	2.09219e+08	2.37938e+08	1.92895e+08	1.42414e+08	1.98964e+08	2.18322e+08	2.21187e+08	2.1413e+08	2.29905e+08	2.61814e+08	192404952	2.44579e+08	2.21848e+08	3.18774e+08	2.47793e+08	2.68365e+08	2.8214e+08	2.83862e+08	2323.54	2679.21	2830.84	3149.74	2267.77	2316.08	3119.32	3549.87	2653.74	2869.2	2699.28	2956.62	2837.84	2698.78	2882
P29457	Serpin H1 OS=Rattus norvegicus GN=Serpinh1 PE=1 SV=1 - [SERPH_RAT]	46.4882	2.08886e+08	6.05726e+08	3.27985e+08	5.66209e+08	233919664	8.41296e+08	2.16215e+08	2.29162e+08	9.84424e+08	8.26571e+08	824698971	9.03834e+08	1.1049e+09	1.06272e+09	8.29831e+08	1.19394e+09	1.16018e+09	8.8837e+08	1.49216e+09	1.65691e+09	1.59023e+09	1.40335e+09	1.31554e+09	1.67387e+09	8.63006e+08	964719364	7.7368e+08	8.01616e+08	7.59102e+08	8.52494e+08	1.15452e+09	1.21709e+09	2319.5	5145.58	3347.01	4361.79	2211.37	5406.19	2826.72	2669.57	6235.14	6263.73	5940.14	5470.81	6786.87	6325.84	5341.88
Q5XIM9	T-complex protein 1 subunit beta OS=Rattus norvegicus GN=Cct2 PE=1 SV=3 - [TCPB_RAT]	57.4221	1.24631e+08	3.16271e+08	1.67015e+08	5.10658e+08	2.44551e+08	5.01019e+08	4.97903e+08	1.62769e+08	3.15112e+08	246807485	2.78478e+08	2.89809e+08	7.07244e+08	7.61115e+08	5.01902e+08	3.83358e+08	3.62377e+08	2.76957e+08	7.13745e+08	4.48621e+08	8.1044e+08	8.01054e+08	7.87115e+08	473868337	3.29885e+08	4.0012e+08	2.67629e+08	9.19548e+08	712855051	1.09271e+09	8.21937e+08	4.03954e+08	2314.48	3072.92	2902.55	2900.49	1708.42	3031.04	2385.91	2445.45	3350.17	3159.07	3154	3299.51	3938.85	3778.88	2941.17
P37397	Calponin-3 OS=Rattus norvegicus GN=Cnn3 PE=1 SV=1 - [CNN3_RAT]	36.4118	3.33381e+08	2.70884e+08	4.08387e+08	3.62876e+08	3.40517e+08	3.30377e+08	3.75467e+08	3.50883e+08	2.69254e+08	3.25113e+08	3.93308e+08	4.31706e+08	374285750	2.91807e+08	4.76157e+08	4.39525e+08	4.75287e+08	327970270	5.56121e+08	5.70388e+08	5.99287e+08	5.65644e+08	7.1722e+08	561684080	3.63713e+08	4.59667e+08	4.52625e+08	4.9097e+08	4.06418e+08	4.66805e+08	5.61315e+08	780041116	2300.92	1786.62	2282.69	1955.8	2078.21	1453.5	2087.06	2287.47	1282.45	1444.77	1726.65	1801.92	1533.56	1197.83	1683.48
P08934	Kininogen-1 OS=Rattus norvegicus GN=Kng1 PE=2 SV=1 - [KNG1_RAT]	70.8888	1.18879e+09	1.41906e+09	1.45667e+09	1680592647	1.77634e+09	1.54647e+09	1.83471e+09	1540126003	3.08038e+09	2.78499e+09	3.65687e+09	3.37961e+09	3.35455e+09	3339894933	3.9654e+09	4379089103	4.03972e+09	3.976e+09	4.15256e+09	4.03188e+09	4.91298e+09	4.04328e+09	5.12823e+09	5.67846e+09	3.46332e+09	4094579547	4.1428e+09	4.01173e+09	4.98699e+09	4677246039	4.70881e+09	5.01902e+09	2293.77	2245.59	2380.07	2219.17	2061.61	1867.3	2314.19	2262.83	2772.74	2595.76	2804.78	2977.71	2639.84	2934.82	3010.48
P49134	Integrin beta-1 OS=Rattus norvegicus OX=10116 GN=Itgb1 PE=2 SV=1 - [ITB1_RAT]	88.4364	2.14048e+08	5.73334e+08	2.87152e+08	5.39018e+08	2.86217e+08	7.43577e+08	2.41124e+08	241171904	4.74483e+08	4.0669e+08	4.06608e+08	451456709	5.64246e+08	4.99893e+08	4.51367e+08	6.21049e+08	5.70755e+08	4.66146e+08	6.10645e+08	6.68442e+08	6.87063e+08	5.76914e+08	6.18924e+08	7.70725e+08	4.89008e+08	5.50539e+08	4.5511e+08	4.5985e+08	4.8924e+08	5.59012e+08	655731086	686099622	2282.98	4525.16	2968.07	4124.56	2074.82	5545.28	2762.98	2967.71	3727.44	3406.48	3213.77	3389.56	4239.69	3815.15	3247.44
Q9EPB1	Dipeptidyl peptidase 2 OS=Rattus norvegicus GN=Dpp7 PE=1 SV=1 - [DPP2_RAT]	55.079	2.26113e+08	2.48394e+08	2.88895e+08	3.23523e+08	3.40472e+08	2.67009e+08	3.18655e+08	3.05251e+08	4.02901e+08	3.10335e+08	3.97908e+08	4.18302e+08	3.6618e+08	3.34988e+08	5.00699e+08	5.08339e+08	4.3235e+08	3.7852e+08	4.59283e+08	4.29226e+08	4.25198e+08	4.10767e+08	4.78168e+08	4.81763e+08	4.27312e+08	4.3742e+08	5.23678e+08	4.69247e+08	5.38239e+08	5.40917e+08	6.55346e+08	5.0838e+08	2282.95	2317.77	2712.76	2926.27	3192.83	2531.58	2964.69	3366.17	3245.52	2914	3126.1	3243.14	3120.71	3047.63	3313.4
Q80U96	Exportin-1 OS=Rattus norvegicus GN=Xpo1 PE=1 SV=1 - [XPO1_RAT]	122.959	120892174	148436631	1.51042e+08	1.99346e+08	6.49972e+07	1.94214e+08	1.77173e+08	1.62291e+08	1.14698e+08	8.60965e+07	1.02916e+08	1.20046e+08	1.21683e+08	9.30452e+07	1.3533e+08	1.67718e+08	1.08007e+08	7.05634e+07	1.45432e+08	138732461	159704873	1.19434e+08	1.64759e+08	1.54443e+08	1.4756e+08	1.73397e+08	1.41978e+08	1.29605e+08	1.66733e+08	1.60383e+08	2.01935e+08	1.86396e+08	2280.74	1908.02	2966.63	2574.62	665.816	2059.05	2679.48	3613.21	1351.7	1081.92	1053.66	1155.13	1261.54	1060.87	1135.5
P14480	Fibrinogen beta chain OS=Rattus norvegicus OX=10116 GN=Fgb PE=1 SV=4 - [FIBB_RAT]	54.2007	2.2279e+08	6.65184e+08	4.5187e+08	6.75459e+08	6.50823e+08	827126000	3.91095e+08	2.23434e+08	1.06099e+09	6.5857e+08	1.04979e+09	9.66446e+08	1.30553e+09	1.01359e+09	8.27763e+08	1.38783e+09	1.14049e+09	4.33042e+08	1.63282e+09	1.61744e+09	1.79548e+09	1.34206e+09	1.44326e+09	1.40306e+09	1.40339e+09	1.50445e+09	9.48517e+08	1.365e+09	1.06939e+09	8.35668e+08	1.8035e+09	1.7134e+09	2277.65	4425.4	4341.12	4779.46	4458.68	4701.48	4085.19	2638.99	5056.13	4490.51	6110.87	5250.77	6718.34	5740.76	5575.27
P48679	Prelamin-A/C OS=Rattus norvegicus GN=Lmna PE=1 SV=1 - [LMNA_RAT]	74.2788	155185795	1.41525e+08	1.76571e+08	1.87844e+08	1.51392e+08	1.77175e+08	1.29306e+08	1.68548e+08	3.54124e+08	319773132	3.62058e+08	3.77728e+08	4.11637e+08	3.32191e+08	4.16624e+08	4.0982e+08	4.40613e+08	2.80725e+08	4.95645e+08	5.50455e+08	5.78717e+08	4.56258e+08	5.86412e+08	410147225	2.78988e+08	2.79455e+08	2.75469e+08	2.80129e+08	2.75858e+08	310075697	3.0135e+08	3.35013e+08	2270.33	2444.31	2200.71	2436.96	1325.09	1790.92	1384.71	1135.25	4267.19	4176.07	4150.79	4304.68	3643.63	3075.34	2910.54
Q9JHL4	Drebrin-like protein OS=Rattus norvegicus GN=Dbnl PE=1 SV=1 - [DBNL_RAT]	48.5825	237154847	2.02989e+08	2.44398e+08	239057988	2.76151e+08	2.35752e+08	2.41009e+08	3.2275e+08	277534388	2.46992e+08	2.41591e+08	2.56208e+08	2.90665e+08	2.63245e+08	3.18388e+08	3.55056e+08	3.18994e+08	2.52489e+08	2.7688e+08	2.94802e+08	3.30881e+08	2.90429e+08	3.45848e+08	3.49783e+08	2.58535e+08	2.69289e+08	2.62417e+08	2.65881e+08	3.37273e+08	2.99447e+08	3.0718e+08	2.68169e+08	2269.78	2159.22	1980.98	2040.76	2136.32	1821.36	2385.11	2059.66	1762.44	1839.53	1831.63	2113.98	1984.23	1915.8	2129.4
Q7M767	Ubiquitin-conjugating enzyme E2 variant 2 OS=Rattus norvegicus GN=Ube2v2 PE=1 SV=3 - [UB2V2_RAT]	16.3422	6.46048e+08	408247896	6.94782e+08	5.02725e+08	8.30608e+08	3.66479e+08	5.71329e+08	8.27242e+08	7.13041e+08	6.5232e+08	7.33123e+08	7.72135e+08	7.77257e+08	6.76833e+08	7.96134e+08	8.52782e+08	8.00499e+08	657231191	7.18373e+08	721376611	7.88608e+08	7.47024e+08	9.7877e+08	7.92964e+08	6.97428e+08	6.91547e+08	8.86911e+08	8.36239e+08	8.4495e+08	913484893	8.18031e+08	7.626e+08	2264.72	1393.06	1629.35	1576.88	1823.24	1126.74	1883.65	2055.2	1634.37	1449.94	1466.33	1380.49	1738.59	1356.68	1452.55
P05708	Hexokinase-1 OS=Rattus norvegicus GN=Hk1 PE=1 SV=4 - [HXK1_RAT]	102.342	9.61423e+07	8.75998e+07	1.12064e+08	4.94439e+08	4.5057e+08	4.18876e+08	1.13745e+08	5.4228e+08	93478566	4.94747e+08	4.60895e+08	5.6698e+08	5.5848e+08	3.68272e+08	1.24646e+09	5.77178e+08	4.99657e+08	3.7803e+08	4.92573e+08	5.69942e+08	5.1058e+08	5.37338e+08	7.5221e+08	6.18839e+08	5.23956e+08	4.94774e+08	5.69951e+08	6.1329e+08	6.49991e+08	5.41294e+08	8.3486e+08	1.2164e+09	2262.47	1585.21	2743.29	2409.07	1932.03	1476.36	2404.7	2376.25	1592.27	1523.4	1495.76	1613.39	1240.64	1450.97	1756.12
Q6IMY8	Heterogeneous nuclear ribonucleoprotein U OS=Rattus norvegicus OX=10116 GN=Hnrnpu PE=1 SV=1 - [HNRPU_RAT]	87.6776	3.83713e+08	5.67319e+08	4.98089e+08	6.66661e+08	3.92547e+08	7.85554e+08	4.84273e+08	4.99541e+08	8.55049e+08	7.26542e+08	7.86897e+08	8.35164e+08	1017163008	8.79774e+08	9.27151e+08	1.04003e+09	1.13985e+09	8.50908e+08	1.36418e+09	1.37838e+09	1.43968e+09	1.302e+09	1355514898	1.46349e+09	8.26931e+08	9.54816e+08	8.50334e+08	8.44936e+08	8.97749e+08	9.68715e+08	1.18068e+09	1.1387e+09	2262.27	3456.89	2772.98	3181.74	2250.95	3814.94	2660.47	2328.93	3844.62	4006.49	3685.24	3522.01	3988.85	3993.42	3876.92
P11915	Non-specific lipid-transfer protein OS=Rattus norvegicus GN=Scp2 PE=1 SV=3 - [NLTP_RAT]	58.7754	4.38342e+08	5.46196e+08	5.4841e+08	6.47086e+08	665964194	5.23192e+08	505708978	5.99189e+08	949307637	8.81207e+08	9.38283e+08	1005760548	1.03187e+09	8.86505e+08	1.12706e+09	1.30318e+09	1.1041e+09	8.56903e+08	1.1732e+09	1.31281e+09	1.41447e+09	1.21772e+09	1.51035e+09	1.40552e+09	1.07101e+09	1.13601e+09	1.13458e+09	1.08205e+09	1.11248e+09	1.27224e+09	1.34985e+09	1.39997e+09	2261.8	1970.18	2313.77	2112.65	2336.88	1565.79	2243.28	2499.84	2252.68	2328.63	2114.15	2383.91	2393.3	2101.71	2643.76
P06399	Fibrinogen alpha chain OS=Rattus norvegicus OX=10116 GN=Fga PE=1 SV=3 - [FIBA_RAT]	86.6319	2.30156e+08	6.20325e+08	4.28277e+08	5.92618e+08	5.71407e+08	6.52887e+08	2.93086e+08	2.53214e+08	8.60425e+08	7.06416e+08	9.76498e+08	9.01371e+08	1.08922e+09	8.41897e+08	8.33409e+08	1.09301e+09	9.9473e+08	6.7929e+08	1351780963	1.29595e+09	1.40717e+09	1.11382e+09	1.26627e+09	1.21922e+09	1134466446	1.07101e+09	8.32893e+08	1.14188e+09	8.76438e+08	772370745	1.14339e+09	1.29779e+09	2261.51	3475.12	3795.05	3770.41	3471.61	3253.59	3016.55	2729.58	4225.1	4277.33	5327.21	4454.04	4610.4	4444.2	3982.11
Q6AYC4	Macrophage-capping protein OS=Rattus norvegicus GN=Capg PE=1 SV=1 - [CAPG_RAT]	38.7746	2.8283e+08	2.22654e+08	2.68576e+08	291825853	2.68001e+08	279615479	3.3924e+08	2.7949e+08	5.32609e+08	4.68239e+08	4.40911e+08	5.41567e+08	5.59707e+08	527754699	6.78411e+08	7.22413e+08	622344804	5.06727e+08	624085230	5.59619e+08	7.26805e+08	6.54647e+08	740392785	7.74121e+08	4.76701e+08	5.20816e+08	5.35121e+08	5.36964e+08	6.21192e+08	621303525	6.4945e+08	5.89997e+08	2260.86	1374.86	2270.44	1471.12	2277.71	1460.78	2298.91	2070.13	2499.44	2405.9	2582.91	2456	2502.42	2107.8	2499.56
Q4KM73	UMP-CMP kinase OS=Rattus norvegicus GN=Cmpk1 PE=1 SV=2 - [KCY_RAT]	22.1552	486103150	3.81092e+08	5.38394e+08	4.94835e+08	5.8087e+08	4.47198e+08	4.94603e+08	5.33243e+08	6.00282e+08	5.27473e+08	5.82199e+08	5.90342e+08	5.64375e+08	563782223	6.59323e+08	7.79375e+08	6.89177e+08	6.02186e+08	6.49054e+08	6.526e+08	700445952	5.79986e+08	8.12936e+08	7.07068e+08	5.0807e+08	6.31628e+08	5.78453e+08	5.39484e+08	6.60364e+08	661052616	6.36497e+08	6.11171e+08	2249.92	1976.93	2472.22	2134.59	1953.09	1640.18	2267.27	2483.03	1693.12	2006.3	1975.5	2156.81	1724.09	1889.7	2182.81
Q6P6R2	Dihydrolipoyl dehydrogenase, mitochondrial OS=Rattus norvegicus GN=Dld PE=1 SV=1 - [DLDH_RAT]	54.0041	1.63853e+08	2.81973e+08	2.22377e+08	3.41325e+08	2.83212e+08	3.51279e+08	2.11294e+08	2.23793e+08	3.45797e+08	2.65955e+08	352928439	3.72448e+08	3.96725e+08	3.74125e+08	4.80293e+08	5.26199e+08	4.08381e+08	297492754	4.72214e+08	4.67795e+08	5.08516e+08	415596357	5.34597e+08	5.59857e+08	4.82099e+08	5.37024e+08	5.4265e+08	4.83534e+08	609918402	5.80252e+08	6.56916e+08	6.53763e+08	2247.96	2934.01	2580.14	3122.7	2707.66	2580.76	2974.31	2563.91	3047.2	2813.2	2707.31	3051.25	2880.76	2811.93	3110.89
Q6B345	Protein S100-A11 OS=Rattus norvegicus GN=S100a11 PE=3 SV=1 - [S10AB_RAT]	11.0575	7.12163e+08	7.5311e+08	6.38633e+08	9.81753e+08	8.81548e+08	9.86858e+08	6.77485e+08	1.04247e+09	1.35098e+09	1.10348e+09	1.41589e+09	1.6572e+09	1.60789e+09	1.17938e+09	2.0587e+09	2.68046e+09	1.51413e+09	1.01298e+09	1.4621e+09	1.6131e+09	1.82628e+09	1.26347e+09	2.53591e+09	1.98142e+09	1.27436e+09	1.43797e+09	1.55548e+09	1.33585e+09	1.83984e+09	1.91039e+09	1.58623e+09	1.90136e+09	2240.16	2612.27	2263.5	2352.25	2133.03	2288.55	2410.49	2344.53	2877.87	3387.35	3345.61	3809.85	3290.06	3712.97	3585.33
P08460	Nidogen-1 (Fragment) OS=Rattus norvegicus GN=Nid1 PE=1 SV=2 - [NID1_RAT]	35.639	3.04955e+08	3.02527e+08	3.72344e+08	3.85682e+08	3.85011e+08	3.85624e+08	3.89295e+08	4.03487e+08	4.02175e+08	3.70666e+08	4.33116e+08	4.02423e+08	4.52934e+08	3.69932e+08	564891068	5.82734e+08	4.62326e+08	3.91803e+08	5.19705e+08	4.53698e+08	5.45136e+08	464333004	5.92111e+08	5.93322e+08	4.10692e+08	4.53887e+08	4.6112e+08	4.69799e+08	6.21473e+08	5.17422e+08	557913371	5.03754e+08	2229.99	1564.24	2092.39	2034.62	1663.54	1740.16	1800.17	2118.15	2007.13	2126.9	2107.79	2227.6	1537.46	1579.35	2099.82
P80254	D-dopachrome decarboxylase OS=Rattus norvegicus GN=Ddt PE=1 SV=3 - [DOPD_RAT]	13.1248	8.10749e+08	6.65754e+08	9.29075e+08	948890924	9.4362e+08	8.20663e+08	1.00442e+09	1.05872e+09	1.36775e+09	1.1567e+09	1.46893e+09	1636818613	1.49364e+09	1.46466e+09	1793032280	1.87748e+09	1675156576	1.42207e+09	1.60545e+09	1.76569e+09	1811281468	1.50439e+09	2.02435e+09	2.05169e+09	1.39248e+09	1.52817e+09	1713362712	1.49532e+09	1.95577e+09	1809875979	1.88026e+09	1.761e+09	2228.84	2040.58	2539.33	2360.39	2249.24	2119.6	2726.04	2662.86	1998.36	2115.26	2225.18	2334.23	2205.97	2103.12	2399.43
Q4QQT4	Serine/threonine-protein phosphatase 2A 65 kDa regulatory subunit A beta isoform OS=Rattus norvegicus GN=Ppp2r1b PE=2 SV=1 - [2AAB_RAT]	65.9645	1.93696e+08	2.13974e+08	1.9176e+08	2.89401e+08	1.68786e+08	3.39779e+08	2.48243e+08	2.65716e+08	2.0632e+08	1.85611e+08	1.73692e+08	2.25787e+08	2.44036e+08	2.21582e+08	2.57652e+08	2.94374e+08	2.46491e+08	1.8223e+08	2.20079e+08	2.43652e+08	3.27234e+08	2.46392e+08	3.13487e+08	2.71701e+08	2.36176e+08	286310268	2.32244e+08	1.99314e+08	3.49785e+08	3.03176e+08	3.47301e+08	3.54305e+08	2227.55	2220.85	2366.66	2398.7	2106.02	2583.42	2419.38	2387.45	1591.16	2094.29	1644.6	2285.25	1882.19	2095.53	2201.55
O35987	NSFL1 cofactor p47 OS=Rattus norvegicus GN=Nsfl1c PE=1 SV=1 - [NSF1C_RAT]	40.6554	1.7546e+08	3.02201e+08	2.39728e+08	3.01437e+08	2.90189e+08	3.08237e+08	2.33113e+08	2.35365e+08	3.72091e+08	3.6656e+08	3.71711e+08	3.84447e+08	4.0714e+08	3.5934e+08	4.54256e+08	5.19713e+08	4.62573e+08	4.24782e+08	4.94005e+08	4.43729e+08	5.56087e+08	4.44995e+08	5.45545e+08	5.64076e+08	3.71643e+08	3.85824e+08	4.02051e+08	4.38962e+08	4.95734e+08	4.79078e+08	4.78042e+08	4.48263e+08	2225.83	2626.02	2351.85	2934.64	2834.23	3426.04	2560.92	2546.41	2739.42	3202.18	2531.46	3148.75	3141.16	2862.8	3400.32
B2GV06	Succinyl-CoA:3-ketoacid coenzyme A transferase 1, mitochondrial OS=Rattus norvegicus GN=Oxct1 PE=1 SV=1 - [SCOT1_RAT]	56.1681	1.51855e+08	1.31744e+08	1.67691e+08	1.59285e+08	1.55264e+08	1.27677e+08	1.81977e+08	1.74471e+08	2.52447e+08	2.19823e+08	2.18073e+08	2.30956e+08	244454357	2.61052e+08	287311480	2.9755e+08	3.35815e+08	3.05778e+08	3.20036e+08	2.8143e+08	361380074	3.05669e+08	3.83959e+08	3.99235e+08	321004299	3.03116e+08	3.30292e+08	2.98108e+08	4.06525e+08	3.89104e+08	3.5104e+08	3.11047e+08	2212.78	2561.33	2554.29	2739.34	2617.14	2650.9	3233.9	2749.44	3381.49	3656.02	3526.59	3879.47	3466.94	3954.63	3727.89
Q920A6	Retinoid-inducible serine carboxypeptidase OS=Rattus norvegicus GN=Scpep1 PE=2 SV=1 - [RISC_RAT]	51.1418	3.63397e+08	3.09612e+08	4.1054e+08	4.96054e+08	4.61424e+08	4.39591e+08	4.80124e+08	4.93822e+08	4.08273e+08	3.36668e+08	4.25787e+08	4.70126e+08	4.369e+08	3.60965e+08	5.46414e+08	6.67148e+08	5.50093e+08	3.95883e+08	5.4654e+08	5.14999e+08	5.67179e+08	4.618e+08	7.07306e+08	6.07556e+08	4.81556e+08	5.29115e+08	507494508	4.66449e+08	661198904	5.67773e+08	6.48753e+08	6.17206e+08	2212.26	1798.53	2399.31	2098.71	1841.67	1746.6	2446.34	2207.88	1795.1	2011.58	1751.71	2101.08	1823.73	1638.77	2095.71
O08557	N(G),N(G)-dimethylarginine dimethylaminohydrolase 1 OS=Rattus norvegicus GN=Ddah1 PE=1 SV=3 - [DDAH1_RAT]	31.4059	2.73605e+08	2.54375e+08	3.16129e+08	3.17207e+08	3.20657e+08	2.89419e+08	3.5227e+08	2.76481e+08	2.3965e+08	2.34201e+08	2.64597e+08	2.70541e+08	2.54575e+08	2.68378e+08	310135771	3.25282e+08	3.02316e+08	2.95064e+08	2.83249e+08	2.87515e+08	3.60669e+08	2.8927e+08	376752166	3.71074e+08	2.79866e+08	2.99201e+08	3.25982e+08	3.07553e+08	3.97509e+08	3.68617e+08	3.67679e+08	3.64955e+08	2208.01	1826.58	2674.66	1933.89	2396.99	1673.48	2655.63	2417.16	1791.1	1735.13	1834.99	1773.99	1663.91	1651.27	1914.98
B0BNE5	S-formylglutathione hydrolase OS=Rattus norvegicus GN=Esd PE=1 SV=1 - [ESTD_RAT]	31.3434	9.47798e+08	8.37019e+08	1.13356e+09	1.09975e+09	1.14015e+09	7.26456e+08	1.16322e+09	1.19236e+09	8.69177e+08	7.49063e+08	1.00586e+09	9.83596e+08	8.23371e+08	2.63467e+08	1.09961e+09	1.08788e+09	3.63078e+08	2.95241e+08	1.06471e+09	3.60958e+08	9.59619e+08	2.5445e+08	1.13295e+09	3.59651e+08	3.18812e+08	3.6041e+08	3.52797e+08	1.11357e+09	3.97614e+08	3.32017e+08	1.08597e+09	3.19898e+08	2207.73	1898.7	2875.36	2273.82	2305.46	1590.36	2847.55	3067.14	1470.52	1795.87	1527.18	2032.13	1328.38	1397.39	1671.87
Q6P7Q4	Lactoylglutathione lyase OS=Rattus norvegicus GN=Glo1 PE=1 SV=3 - [LGUL_RAT]	20.8063	8.31429e+08	5.75968e+08	6.98508e+08	7.11176e+08	9.33011e+08	5.17284e+08	5.8312e+08	8.92673e+08	8.45643e+08	704989886	7.38231e+08	9.03204e+08	7.8439e+08	6.30722e+08	9.25153e+08	1.19134e+09	9.41924e+08	8.12171e+08	7.21954e+08	8.91324e+08	7.28879e+08	6.12222e+08	1034869059	7.83352e+08	8.16128e+08	9.29871e+08	9.03209e+08	7.77451e+08	8.87505e+08	9.67864e+08	773054082	8.7284e+08	2191.25	1413.31	2239.03	1733.81	1833.17	814.984	1594.64	2189.31	1822.1	1720.72	1579.72	1735.52	1326.48	1202	1657.14
Q9Z0V5	Peroxiredoxin-4 OS=Rattus norvegicus GN=Prdx4 PE=2 SV=1 - [PRDX4_RAT]	30.9881	1.19708e+09	1.27565e+09	1.367e+09	1.4872e+09	1.42597e+09	1.41034e+09	1.34948e+09	1.06839e+09	1.94799e+09	2705253618	1775372359	2.27415e+09	2.06593e+09	1.84087e+09	2.23631e+09	3.48929e+09	3.13519e+09	2.90281e+09	2976020955	3.12922e+09	2558291192	3051667576	2.79458e+09	3.48156e+09	1.93404e+09	2.03565e+09	1.83916e+09	3.0816e+09	3400161029	3.49167e+09	3.3973e+09	3.3318e+09	2191.13	2001.09	2637.74	2827.43	2524.89	1723.5	2841.69	2475.28	2808.3	2850.85	3333.13	3203.98	2679.47	2637.36	2772.97
P30919	N(4)-(Beta-N-acetylglucosaminyl)-L-asparaginase OS=Rattus norvegicus GN=Aga PE=1 SV=2 - [ASPG_RAT]	37.1434	2.66757e+08	2.75258e+08	2.71619e+08	2.73413e+08	2.90639e+08	2.12981e+08	2.4913e+08	2.3777e+08	336540725	298390660	2.8669e+08	2.89786e+08	278880421	271432091	3.41095e+08	4.20885e+08	3.74027e+08	3.20373e+08	3.33486e+08	3.00351e+08	320978561	2.82361e+08	3.66721e+08	3.74225e+08	3.11834e+08	267942679	3.102e+08	2.73901e+08	3.04265e+08	3.08503e+08	3.24646e+08	2.87354e+08	2182.52	1431.89	2081.83	1241.41	1945.28	1005.84	2339.49	1401.71	1502.27	937.976	1145.05	1408.88	1604.9	1000.81	1177.32
Q6P686	Osteoclast-stimulating factor 1 OS=Rattus norvegicus GN=Ostf1 PE=1 SV=1 - [OSTF1_RAT]	23.6539	4.2279e+08	3.80896e+08	5.05838e+08	466008063	5.11551e+08	3.90937e+08	4.20485e+08	4.42003e+08	536745830	4.53146e+08	5.02986e+08	6.01938e+08	5.21847e+08	5.03927e+08	5.28546e+08	6.45948e+08	6.5595e+08	553253398	5.6673e+08	6.35327e+08	5.77427e+08	5.23026e+08	617329021	5.2978e+08	4.92472e+08	5.45576e+08	5.0179e+08	4.91061e+08	5.72845e+08	5.86452e+08	5.48405e+08	5.48629e+08	2181.15	1131.81	1608.69	1252.84	1468.74	1052.37	1441.97	1438.8	1406.72	1327.96	1370.71	1278.96	1142.62	1114.26	1133.75
P24155	Thimet oligopeptidase OS=Rattus norvegicus GN=Thop1 PE=1 SV=4 - [THOP1_RAT]	78.3354	1.9488e+08	153963269	1.91283e+08	2.13724e+08	1.88348e+08	186033079	2.16721e+08	2.09477e+08	1.39236e+08	1.32266e+08	1.5339e+08	166797455	1.66998e+08	1.4952e+08	1.78277e+08	2.19973e+08	1.69134e+08	1.49245e+08	1.66289e+08	172756841	1.87076e+08	1.71579e+08	223906023	217404570	1.54152e+08	1.73903e+08	1.87617e+08	1.62188e+08	215285234	203882494	2.26418e+08	1.97885e+08	2164.44	1714.68	2472.98	2313.62	2235.99	1686.21	2924.45	2827.84	1501.82	1560.2	1638.55	1511.28	1536.26	1754.24	1703.21
O89049	Thioredoxin reductase 1, cytoplasmic OS=Rattus norvegicus GN=Txnrd1 PE=1 SV=5 - [TRXR1_RAT]	54.6367	1.94276e+08	1.80142e+08	2.21881e+08	2.56443e+08	2.70157e+08	2.64037e+08	2.51687e+08	2.2465e+08	2.69651e+08	328489861	3.48309e+08	3.42586e+08	3.88628e+08	2.65783e+08	3.42911e+08	3.97714e+08	3.1965e+08	335749445	3.18173e+08	3.29092e+08	3.57756e+08	3.08601e+08	4.42058e+08	4.35934e+08	3.83263e+08	4.50431e+08	3.51745e+08	3.12728e+08	4.32553e+08	4.85896e+08	4.30516e+08	3.98911e+08	2163.88	1730.1	2219.62	2162.19	2219.77	1656.23	2205.23	2877.2	2088.48	2356.58	2087.59	2241.02	2021.83	2096.07	2305.12
P12368	cAMP-dependent protein kinase type II-alpha regulatory subunit OS=Rattus norvegicus OX=10116 GN=Prkar2a PE=1 SV=4 - [KAP2_RAT]	45.4517	2.04499e+08	2.04676e+08	2.45198e+08	2.48595e+08	2.43107e+08	2.22091e+08	2.35556e+08	2.12451e+08	2.11841e+08	1.88128e+08	2.07854e+08	2.21842e+08	2.12587e+08	2.36098e+08	2.54712e+08	2.65545e+08	2.47135e+08	2.24137e+08	2.60599e+08	2.49234e+08	2.51628e+08	2.21133e+08	2.89219e+08	288917077	2.42804e+08	2.41184e+08	2.54104e+08	2.33193e+08	2.69944e+08	2.64783e+08	3.00895e+08	2.74204e+08	2161.72	1715.95	2724.06	2057.7	1809.83	1533.95	2509	2706.4	1905.13	2040.58	1589.47	1943.45	1468.52	1880.91	1824.28
Q9EQX9	Ubiquitin-conjugating enzyme E2 N OS=Rattus norvegicus GN=Ube2n PE=1 SV=1 - [UBE2N_RAT]	17.113	1.05457e+09	9.52701e+08	1.18012e+09	1.28079e+09	1.34326e+09	1.28252e+09	1.26659e+09	1.1628e+09	1.1348e+09	8.05183e+08	1.22811e+09	1.22349e+09	1.21375e+09	1.24416e+09	1.4546e+09	1.59741e+09	1.51979e+09	1.14595e+09	1.38614e+09	1.45186e+09	1.64625e+09	1.42129e+09	1.82632e+09	1.82804e+09	1.31426e+09	1.41664e+09	1.41884e+09	1.45413e+09	1712945735	1.57028e+09	1.83911e+09	1.65232e+09	2155.11	1873.78	2173.14	2039.59	2260.48	1812.81	2155.02	2064.88	1979.27	1831.17	1639.78	1796.17	1864.63	1680.02	1886.63
Q63663	Guanylate-binding protein 1 OS=Rattus norvegicus OX=10116 GN=Gbp2 PE=1 SV=2 - [GBP2_RAT]	67.0665	157653363	1.57987e+08	2.14859e+08	250276462	2.0171e+08	2.03746e+08	2.21749e+08	1.95964e+08	6.09524e+07	5.21974e+07	6.42435e+07	8.63224e+07	6.96012e+07	7.19906e+07	1.00548e+08	8.19291e+07	5.84676e+07	4.25126e+07	8.7509e+07	8.43092e+07	9.56999e+07	1.06384e+08	1.06079e+08	1.10597e+08	6.63109e+07	9.05435e+07	8.3086e+07	6.80708e+07	8.98446e+07	1.02468e+08	1.21146e+08	8.50214e+07	2149.76	1799.98	2420.15	2709.11	2496.25	1848.98	2930.53	2704.4	1035.47	820.655	830.892	763.627	655.799	808.946	761.907
Q64057	Alpha-aminoadipic semialdehyde dehydrogenase OS=Rattus norvegicus GN=Aldh7a1 PE=1 SV=2 - [AL7A1_RAT]	58.7114	2.05682e+08	2.0509e+08	2.78045e+08	2.94311e+08	266048960	2.46124e+08	3.07306e+08	2.63841e+08	2.98386e+08	2.64149e+08	2.99649e+08	3.06832e+08	312645222	3.28363e+08	3.62223e+08	4.17707e+08	3.42416e+08	2.8724e+08	3.63093e+08	4.23882e+08	3.74529e+08	3.41721e+08	412636377	4.37913e+08	331151784	4.23981e+08	3.95899e+08	3.44912e+08	3.82226e+08	4.271e+08	5.25017e+08	4.53999e+08	2148.24	2007.51	2912.24	2827.09	3125.19	2321.75	3439.48	3186.88	2845.88	2775.96	2589.45	3169.8	2993.35	3052.44	2986.04
Q6AYH5	Dynactin subunit 2 OS=Rattus norvegicus GN=Dctn2 PE=1 SV=1 - [DCTN2_RAT]	44.1207	1.91882e+08	1.85672e+08	200783289	2.20339e+08	2.48842e+08	2.36999e+08	2.14719e+08	1.86437e+08	2.57476e+08	2.06201e+08	2.21076e+08	2.28946e+08	2.83446e+08	2.49179e+08	2.41499e+08	3.31606e+08	2.14431e+08	2.52715e+08	2.13027e+08	3.79841e+08	322465062	239320254	3.8888e+08	3.84328e+08	157867171	2.22262e+08	1.78355e+08	1.98719e+08	2.16147e+08	1.70768e+08	2.43126e+08	266117556	2138.33	1994.68	1952	2474.94	2609.27	2114.31	2485.09	2602.62	2285.95	1976.79	2053.53	2210.31	1883.11	2040.71	2145.41
O35509	Ras-related protein Rab-11B OS=Rattus norvegicus GN=Rab11b PE=1 SV=4 - [RB11B_RAT]	24.4735	4.8797e+08	6.43401e+08	6.95923e+08	773786467	6.7188e+08	6.60256e+08	7.88994e+08	7.9443e+08	742397115	7.90644e+08	8.28841e+08	7.92203e+08	8.48708e+08	7.33712e+08	8.92744e+08	977075086	9.65543e+08	8.51199e+08	1.0433e+09	1.04178e+09	1.00462e+09	9.75339e+08	1164110337	1.19368e+09	7.9318e+08	9.17517e+08	9.37327e+08	9.45065e+08	9.79759e+08	1.01574e+09	1.15369e+09	1.04033e+09	2138.23	2051.66	2209.36	2190.19	1745.92	1793.45	1982.39	2084.48	1938.86	2069.88	1882.78	1891.61	1815.45	2055.87	2000.1
Q9HB97	Alpha-parvin OS=Rattus norvegicus GN=Parva PE=1 SV=2 - [PARVA_RAT]	42.2654	2.79223e+08	3.46955e+08	3.17221e+08	5.09691e+08	406359043	4.38512e+08	3.69538e+08	4.15753e+08	353145605	3.27655e+08	3.60612e+08	3.8995e+08	4.2476e+08	3.45081e+08	4.83581e+08	5.69388e+08	4.35888e+08	3.10563e+08	4.6378e+08	4.86604e+08	5.47381e+08	4.12991e+08	593442626	6.33765e+08	4.12558e+08	4.52204e+08	4.25343e+08	4.76159e+08	5.62472e+08	5.25641e+08	6.63952e+08	6.17071e+08	2118.73	2441.38	2445.91	2780.26	2479.56	2220.01	2409.83	2121.32	1820.82	2076.35	2043.03	2017.51	1813.19	2046.9	1861.64
Q07266	Drebrin OS=Rattus norvegicus GN=Dbn1 PE=1 SV=3 - [DREB_RAT]	77.4242	1.36932e+08	1.33539e+08	1.55285e+08	1.60362e+08	1.53301e+08	128855745	1.36033e+08	1.51393e+08	1.73876e+08	1.63226e+08	1.53641e+08	1.73761e+08	1.82643e+08	1.33964e+08	1.78978e+08	2.17597e+08	1.96796e+08	1.6368e+08	1.81962e+08	2.00195e+08	1.98236e+08	1.83941e+08	2.18579e+08	2.04838e+08	1.38744e+08	1.50562e+08	1.57331e+08	1.45279e+08	1.60119e+08	1.62217e+08	1.66221e+08	1.62582e+08	2099.21	1448.73	1809.46	1551.04	1903.1	1022.99	2007.19	2186.06	1452.21	1390.02	1462.92	1508.8	1288.8	884.444	1233.01
P13221	Aspartate aminotransferase, cytoplasmic OS=Rattus norvegicus GN=Got1 PE=1 SV=3 - [AATC_RAT]	46.3995	1.87812e+08	1.76065e+08	2.36945e+08	2.2398e+08	2.18941e+08	1.94495e+08	2.44781e+08	2.2664e+08	3.22424e+08	3.28349e+08	3.54761e+08	3.96813e+08	3.54735e+08	3.30607e+08	4.19959e+08	466582484	3.62541e+08	3.91074e+08	371294933	3.79366e+08	4.08932e+08	3.43591e+08	4.60898e+08	4.56937e+08	3.15491e+08	3.48711e+08	3.93726e+08	3.6761e+08	4.43371e+08	396707716	4.44796e+08	4.52911e+08	2090.82	1697.77	2226.21	2007.15	2057.85	1513.97	2713.01	2660.87	2485.11	2716.55	2306.11	2394.6	2556.33	2234.86	2372.92
P31977	Ezrin OS=Rattus norvegicus GN=Ezr PE=1 SV=3 - [EZRI_RAT]	69.3476	9.70205e+08	2.18401e+09	1.3721e+09	1.95227e+09	1576287732	3319106311	1.59294e+09	1.50678e+09	2.15667e+09	1.75163e+09	2.06591e+09	2.12808e+09	2.59812e+09	2.45948e+09	2.34821e+09	2847125972	2.61685e+09	2.33401e+09	3.3275e+09	3.0345e+09	3.39544e+09	3.07121e+09	3236343087	3.63421e+09	2725072802	3.02634e+09	2.45822e+09	2.86618e+09	2.69012e+09	2.83271e+09	3.72788e+09	3.98987e+09	2087.28	4627.87	3001.59	3828.01	3229.73	5876.99	3217.97	3278.88	4336.12	3744.77	4626.01	4373.24	5404.19	4247.52	3921.5
P11348	Dihydropteridine reductase OS=Rattus norvegicus GN=Qdpr PE=1 SV=1 - [DHPR_RAT]	25.5359	1.98879e+08	2.1101e+08	2.41856e+08	2.62021e+08	2.45165e+08	2.1975e+08	2.58062e+08	1.83803e+08	2.11345e+08	2.03182e+08	2.25344e+08	2.41053e+08	2.16792e+08	202764407	2.47024e+08	296149737	2.44085e+08	1.95156e+08	2.58924e+08	2.51954e+08	301553929	2.38708e+08	3.19741e+08	2.78674e+08	223578456	2.43154e+08	2.34098e+08	2.6414e+08	2.69155e+08	2.56067e+08	2.92973e+08	2.74987e+08	2084.75	1881.17	2363.1	2068.81	2269.75	1995.43	2435.69	2198.79	2179.83	1990.4	2512.64	2362.48	2060.31	2049	2354.35
Q6NYB7	Ras-related protein Rab-1A OS=Rattus norvegicus GN=Rab1A PE=1 SV=3 - [RAB1A_RAT]	22.6634	6.13169e+08	1.20285e+09	8.67424e+08	1.20763e+09	7.14083e+08	1.28555e+09	7.86833e+08	7.33824e+08	1.59432e+09	1.43639e+09	1.55484e+09	1.63038e+09	1.72395e+09	1.56275e+09	1547765628	1.88808e+09	1.96243e+09	1.53242e+09	2.08895e+09	2.17546e+09	2.28002e+09	2.08372e+09	2.22225e+09	2.46108e+09	1.69747e+09	1.72155e+09	1.71067e+09	1.77147e+09	1774223978	1.79655e+09	2.23483e+09	2.15316e+09	2083.12	2017.32	2255.36	2001.75	2023.72	2144.36	2409.63	2476.02	2623.01	2387.92	2589.36	2349.82	2526.41	2133.59	2329.79
Q63081	Protein disulfide-isomerase A6 OS=Rattus norvegicus GN=Pdia6 PE=1 SV=2 - [PDIA6_RAT]	48.1433	2.38009e+08	7.29431e+08	4.59684e+08	7.99328e+08	4.54011e+08	1.46508e+09	4.51535e+08	4.76821e+08	1.1861e+09	1031757104	1.15871e+09	1.06638e+09	1.6138e+09	1.20617e+09	1.16261e+09	1710041824	1.43851e+09	1.1341e+09	1.96146e+09	1.82011e+09	2.16646e+09	1.6332e+09	1.82931e+09	2.02239e+09	1.50277e+09	1.54954e+09	1.07199e+09	1.3177e+09	1.41194e+09	1.36782e+09	2.31913e+09	2.11456e+09	2083.12	3443.53	2728.01	3365.71	1717.04	4115.64	2355.15	2360.41	3574.98	3303.53	3538.09	3355.12	3890.04	3789.47	3318.84
P62828	GTP-binding nuclear protein Ran OS=Rattus norvegicus GN=Ran PE=1 SV=3 - [RAN_RAT]	24.4076	1166377007	1.24346e+09	1.44512e+09	1.4387e+09	1.50688e+09	1.3688e+09	1.63671e+09	1.59347e+09	1.9967e+09	1.88443e+09	2.21756e+09	2119615329	2.02562e+09	1.93286e+09	2.51114e+09	2.57697e+09	2461735512	2.22036e+09	2.68217e+09	2.29568e+09	2.55449e+09	2.5172e+09	2.87944e+09	2.80059e+09	1.87372e+09	1.92729e+09	2.12132e+09	2.17064e+09	2.5007e+09	2.33674e+09	2.739e+09	2.16955e+09	2075.3	1574.84	2264.21	2302.51	2657.31	2073.92	2457.22	2323.04	2305.55	2253.57	2332.88	2843.21	2211.42	2220.17	2271.04
P20761	Ig gamma-2B chain C region OS=Rattus norvegicus GN=Igh-1a PE=1 SV=1 - [IGG2B_RAT]	36.4742	4.71768e+08	1.19783e+09	8.32853e+08	1.10593e+09	1.07051e+09	1.43942e+09	8.55014e+08	5.69412e+08	1.37797e+09	1.14212e+09	1794640620	1.46656e+09	1.89434e+09	1.4779e+09	1.57665e+09	2.00887e+09	1.37033e+09	8.40455e+08	1.92834e+09	2.01477e+09	2.09506e+09	1.7342e+09	1.88554e+09	1.79731e+09	2.07179e+09	1.94299e+09	2.02561e+09	2.45471e+09	1.83495e+09	1.85389e+09	2525577469	2.71918e+09	2062.88	3149.9	2915.84	3131.52	2522.57	3268.71	2555.32	2527.16	3502.72	2947.8	3986.95	3129.17	3303.77	3409.1	2978.32
Q9WV25	Poly(U)-binding-splicing factor PUF60 OS=Rattus norvegicus GN=Puf60 PE=2 SV=2 - [PUF60_RAT]	60.2108	1.47766e+08	1.27999e+08	1.75556e+08	1.73593e+08	1.85155e+08	1.46462e+08	1.86487e+08	1.678e+08	1.42349e+08	1.27689e+08	1.45095e+08	1.87111e+08	1.55437e+08	1.41128e+08	1.61572e+08	2.38002e+08	1.79086e+08	1.76568e+08	2.38567e+08	2.40168e+08	2.22585e+08	2.17532e+08	2.64004e+08	2.85495e+08	1.80499e+08	2.01117e+08	2.09834e+08	1.96031e+08	2.22024e+08	2.61707e+08	2.50676e+08	2.37257e+08	2056.23	1413.37	2526.16	1850.44	1976.27	1085.81	2053.54	2176.92	1113.58	1477.37	1242.65	1371.11	1518.68	1397.91	1471.84
Q63413	Spliceosome RNA helicase Ddx39b OS=Rattus norvegicus GN=Ddx39b PE=1 SV=3 - [DX39B_RAT]	49.004	2.11839e+08	659733425	3.59715e+08	6.868e+08	447852456	978233760	3.19695e+08	3.04064e+08	816698679	7.65802e+08	8.46086e+08	658279600	1003639823	9.65373e+08	6.85182e+08	1.0176e+09	8.60817e+08	7.05748e+08	1.18526e+09	1.20154e+09	1.3825e+09	1.04827e+09	9.71371e+08	1.22829e+09	9.11015e+08	1007787634	6.00547e+08	7.72522e+08	7.81236e+08	7.1017e+08	1.21679e+09	1.20154e+09	2045.57	4617.92	2942.32	3969.57	2810.96	4801.75	2473.27	2542.56	4774.9	4032.32	4154.49	3761.35	5183.06	4542.03	3285.56
P12711	Alcohol dehydrogenase class-3 OS=Rattus norvegicus GN=Adh5 PE=1 SV=2 - [ADHX_RAT]	39.5502	3.20137e+08	326199672	3.48376e+08	3.59822e+08	2.13434e+08	377939302	3.44864e+08	3.2136e+08	4.23046e+08	3.46446e+08	3.48718e+08	3.77288e+08	4.21906e+08	3.57908e+08	3.8231e+08	4.58256e+08	4.51715e+08	4.04065e+08	4.86196e+08	4.67109e+08	5.59838e+08	4.62348e+08	502404037	5.73305e+08	3.69418e+08	3.58659e+08	2.9989e+08	3.15806e+08	3.99608e+08	3.86476e+08	4.57669e+08	4.63803e+08	2044.37	2588.17	2530.64	2536.71	1286.92	2470.33	2656.04	2443.7	2400.26	2198.74	1755.48	2016.39	2401.87	2462.9	2324.77
P63331	Serine/threonine-protein phosphatase 2A catalytic subunit alpha isoform OS=Rattus norvegicus GN=Ppp2ca PE=1 SV=1 - [PP2AA_RAT]	35.5854	3.12638e+08	3.10585e+08	422945745	4.59531e+08	3.10255e+08	4.80143e+08	3.87823e+08	3.86817e+08	3.93999e+08	3.34877e+08	3.6173e+08	412183673	4.62401e+08	4.55777e+08	3.95332e+08	497779087	4.22529e+08	3.84021e+08	4.61042e+08	4.98985e+08	4.95337e+08	4.48081e+08	5.01425e+08	5.25652e+08	3.82052e+08	4.12693e+08	4.07928e+08	3.99245e+08	4.2742e+08	4.72801e+08	5.45667e+08	4.66025e+08	2038.56	1680.3	2105.53	2201.2	1442.81	2065.52	2408.31	2071.78	2255.51	2143.25	2043.72	2280.75	2105.52	2061.08	1877.67
Q68FP2	Serum paraoxonase/lactonase 3 OS=Rattus norvegicus OX=10116 GN=Pon3 PE=2 SV=1 - [PON3_RAT]	39.4332	5.08312e+08	3.22585e+08	4.97138e+08	5.56592e+08	5.57475e+08	381890258	4.89977e+08	570764143	3.90337e+08	2.73643e+08	3.85995e+08	3.93296e+08	3.28852e+08	342130060	4.54489e+08	4.64066e+08	4.79846e+08	2.97997e+08	3.33018e+08	3.67855e+08	3.03825e+08	3.73824e+08	4.47016e+08	4.30922e+08	4.22555e+08	461743489	4.15395e+08	4.79398e+08	5.1962e+08	5.41108e+08	4.73853e+08	3.97271e+08	2036.79	1661.25	2232.34	1375.9	2415.14	891.978	2207.63	2274.23	1235.66	837.215	1270.89	898.811	1106.39	1021.85	887.199
P39069	Adenylate kinase isoenzyme 1 OS=Rattus norvegicus GN=Ak1 PE=1 SV=3 - [KAD1_RAT]	21.5702	2.0656e+08	1.93184e+08	2.04489e+08	2.56916e+08	2.31155e+08	1.99171e+08	2.65305e+08	2.01961e+08	1.7693e+08	1.69662e+08	1.84107e+08	2.07658e+08	1.62358e+08	1.51028e+08	2.27486e+08	2.73571e+08	2.59174e+08	1.98394e+08	2.78582e+08	2.5504e+08	2.79767e+08	1.92962e+08	3.53542e+08	297412350	1.69768e+08	1.81014e+08	1.87022e+08	1.89385e+08	2.30989e+08	2.1122e+08	2.2369e+08	214993539	2025.78	1375.63	2208.59	1480.34	1538.58	1143.49	1951.42	2141.29	1288.93	1280.67	1340.57	1383.63	1169.1	1181.47	1219.84
A0A0G2K2P5	Tight junction protein ZO-1 OS=Rattus norvegicus OX=10116 GN=Tjp1 PE=1 SV=1 - [ZO1_RAT]	197.028	4.74101e+08	503105562	581694124	5.76827e+08	5.07938e+08	2.51105e+08	5.70457e+08	6.73092e+08	512727639	4.67776e+08	5.6379e+08	6.0808e+08	5.18673e+08	7.24014e+08	9.63383e+08	9.4071e+08	5.62255e+08	2.13323e+08	6.76836e+08	573440306	6.61608e+08	5.60494e+08	7.36396e+08	6.715e+08	486172470	558809050	6.80794e+08	6.37335e+08	6.26027e+08	1.10854e+09	7.36611e+08	6.70198e+08	2016.96	1773.74	1828.96	1957.89	1823.96	1912.35	1890.74	2127.15	1829.91	1995.82	2089.75	1837.75	1953.37	1951.45	1783.31
Q711G3	Isoamyl acetate-hydrolyzing esterase 1 homolog OS=Rattus norvegicus GN=Iah1 PE=2 SV=2 - [IAH1_RAT]	27.9864	2.25148e+08	1.53966e+08	2.47342e+08	273487677	2.34301e+08	2.09786e+08	2.74626e+08	3.05725e+08	2.56584e+08	2.098e+08	2.84679e+08	3.09236e+08	2.8168e+08	2.71382e+08	348987388	3.8119e+08	261857483	2.26463e+08	2.59656e+08	2.86566e+08	283482564	237557864	3.4828e+08	3.53067e+08	2.62736e+08	3.09224e+08	317745824	2.97107e+08	3.71367e+08	3.0607e+08	3.35372e+08	3.24683e+08	2006.19	1421.64	1492.46	1603.75	1867.55	1366.92	1967.92	2158.32	1639.09	1781.17	1602.48	1898.85	1701.32	2071.92	2116.63
Q64240	Protein AMBP OS=Rattus norvegicus GN=Ambp PE=1 SV=1 - [AMBP_RAT]	38.826	9.59086e+08	9.05265e+08	9.54189e+08	1.07913e+09	1.20319e+09	9.71252e+08	1.05195e+09	1.03394e+09	1.64527e+09	1450061719	1.71364e+09	1.76566e+09	1.93075e+09	1.73531e+09	2.28256e+09	2.39852e+09	1.73031e+09	1.42569e+09	1.96837e+09	1.72825e+09	2176837986	1.7858e+09	2.27149e+09	2.22473e+09	1.81892e+09	1.89775e+09	2.14783e+09	1.91644e+09	2.3699e+09	2.2533e+09	2.43353e+09	2.23178e+09	2003.19	1557.45	2137.19	1751.06	1383.1	1356.28	1902.07	2400.5	2304.77	2338.29	2397.33	2412.08	1951.18	2338.33	2534.24
P32362	Uroporphyrinogen decarboxylase (Fragment) OS=Rattus norvegicus GN=Urod PE=1 SV=1 - [DCUP_RAT]	40.4268	2.10849e+08	2.05071e+08	2.51313e+08	2.77947e+08	2.68094e+08	2.09967e+08	2.72192e+08	2.91049e+08	2.40532e+08	2.36924e+08	2.60239e+08	2.74261e+08	2.68863e+08	2.02771e+08	3.68424e+08	4.03983e+08	3.08424e+08	2.56325e+08	3.14221e+08	2.82716e+08	3.48317e+08	2.58076e+08	3.45743e+08	3.68776e+08	2.42445e+08	2.71542e+08	2.47805e+08	2.65259e+08	3.56847e+08	3.07803e+08	3.69042e+08	3.48011e+08	2001.46	1613.41	1767.05	1789.3	1964.12	1473.18	1980.2	1905.54	1530.38	1534.22	1417.1	1479.95	1239.55	1236.06	1436.17
Q6IRK9	Carboxypeptidase Q OS=Rattus norvegicus GN=Cpq PE=1 SV=1 - [CBPQ_RAT]	52.0086	2.82463e+08	2.48466e+08	3.0525e+08	3.11405e+08	3.43784e+08	2.94158e+08	3.222e+08	3.01888e+08	3.00647e+08	3.19787e+08	3.08462e+08	3.27744e+08	3.46864e+08	3.50944e+08	363877594	3.82778e+08	3.87349e+08	3.6694e+08	3.95453e+08	3.80808e+08	457871413	379316568	4.11894e+08	463524409	3.23443e+08	346712978	3.79023e+08	3.72265e+08	449091070	3.71305e+08	4.70188e+08	419058223	1992.78	1309.66	1687.22	1906.68	1830.7	1749.79	2131.25	1758.93	1388.86	1419.58	1167.34	1542.38	1938.37	1924.86	1800.16
P14604	Enoyl-CoA hydratase, mitochondrial OS=Rattus norvegicus GN=Echs1 PE=1 SV=1 - [ECHM_RAT]	31.4962	8.6444e+07	2.28347e+08	1.98896e+08	2.27717e+08	2.25443e+08	2.61115e+08	1.49189e+08	1.06817e+08	2.74838e+08	2.23228e+08	3.03641e+08	2.94377e+08	3.26203e+08	287271388	3.01204e+08	3.76378e+08	3.58408e+08	1.80455e+08	3.92591e+08	374705528	4.41802e+08	3.60649e+08	4.07394e+08	4.15395e+08	3.86403e+08	4.12887e+08	3.5067e+08	4.1853e+08	3.72299e+08	3.38727e+08	5.11025e+08	4.69761e+08	1968.11	3183.86	3044.84	2809.71	3071.14	3009.22	2912.08	2133.2	2922.31	3180.4	3474.15	3204.17	3689.74	3524.8	3618.4
P30427	Plectin OS=Rattus norvegicus GN=Plec PE=1 SV=2 - [PLEC_RAT]	533.214	2.59992e+09	1.0108e+09	2.50812e+09	2.4036e+09	2.4115e+09	1.10828e+09	1.51535e+09	2.34909e+09	1.95028e+09	1.85299e+09	2.78419e+09	2.14477e+09	1220845815	1.6992e+09	2.42052e+09	2.46942e+09	2.22838e+09	2.58281e+09	1385285974	2.10069e+09	2.3005e+09	1.24963e+09	2.03795e+09	1.99052e+09	1238172845	1.40545e+09	1.87017e+09	1.87156e+09	1.1865e+09	3.08565e+09	2.61411e+09	1.5373e+09	1967.82	1536.98	1946.12	2056.3	1488.44	997.172	1805.05	1887.76	2827.38	3170.79	2802.39	3404.1	2753.01	2333.68	2863.75
O35796	Complement component 1 Q subcomponent-binding protein, mitochondrial OS=Rattus norvegicus GN=C1qbp PE=1 SV=2 - [C1QBP_RAT]	30.9775	2.39327e+08	2.79916e+08	2.39164e+08	2.76126e+08	2.76816e+08	3.486e+08	2.6251e+08	2.3752e+08	5.08762e+08	4.3902e+08	5.28551e+08	5.02818e+08	5.45812e+08	6.17435e+08	5.5901e+08	6.03649e+08	7.16425e+08	6.35268e+08	6.47032e+08	5.61608e+08	7.22954e+08	5.00518e+08	7.09597e+08	7.4279e+08	5.96991e+08	7.43741e+08	6.92429e+08	6.04927e+08	9.25898e+08	7.50155e+08	7.01424e+08	7.45735e+08	1958.3	1797.59	2034.84	1872.68	1812.64	1506.39	1965.95	1792.1	2484.43	2475.07	2403.05	2926.32	2474.42	2602.54	2544.2
P62716	Serine/threonine-protein phosphatase 2A catalytic subunit beta isoform OS=Rattus norvegicus GN=Ppp2cb PE=1 SV=1 - [PP2AB_RAT]	35.5523	3.12638e+08	3.10585e+08	422945745	4.59531e+08	3.10255e+08	4.80143e+08	3.87823e+08	3.86817e+08	3.93999e+08	3.34877e+08	3.6173e+08	412183673	4.62401e+08	4.55777e+08	3.95332e+08	497779087	4.22529e+08	3.84021e+08	4.61042e+08	4.98985e+08	4.95337e+08	4.48081e+08	5.01425e+08	5.25652e+08	3.82052e+08	4.12693e+08	4.07928e+08	3.99245e+08	4.2742e+08	4.72801e+08	5.45667e+08	4.66025e+08	1948.18	1629.04	1984.7	2089	1359.3	2096.05	2420.86	2105.11	2161.29	2016.31	1942.62	2170.02	2015.08	1963.64	1808.24
P05370	Glucose-6-phosphate 1-dehydrogenase OS=Rattus norvegicus GN=G6pdx PE=1 SV=3 - [G6PD_RAT]	59.3378	1.54281e+08	138769132	6.65677e+08	1.96653e+08	1.57068e+08	581067607	1.7238e+08	1.65711e+08	2.10055e+08	1.61466e+08	9.92647e+08	944235338	1.00594e+09	8.21913e+08	1.17762e+09	2.81093e+08	2.77248e+08	2.43409e+08	8.49721e+08	9.68641e+08	1.008e+09	1.03372e+09	1.27979e+09	2.74014e+08	2.15825e+08	2.51622e+08	9.70957e+08	9.34462e+08	1117897756	1.1351e+09	1.26826e+09	1.20455e+09	1936.04	1344	2263.63	1797.55	1971.51	1484.87	1964.09	2031.46	1708.88	1589.27	1990.78	2030.63	1576.51	1749.67	2123.72
O55171	Acyl-coenzyme A thioesterase 2, mitochondrial OS=Rattus norvegicus GN=Acot2 PE=1 SV=1 - [ACOT2_RAT]	49.6697	1.11056e+08	1.25953e+08	1.38534e+08	1.61505e+08	1.4308e+08	169862347	1.65953e+08	171131436	1.60559e+08	1.58435e+08	2.04093e+08	1.94398e+08	1.8769e+08	1.87566e+08	2.45837e+08	2.75918e+08	2.14827e+08	1.81945e+08	2.4277e+08	2.48259e+08	2.64325e+08	2.19971e+08	2.89808e+08	2.8723e+08	2.13079e+08	2.49959e+08	2.57231e+08	2.35446e+08	310903496	2.82436e+08	3.19844e+08	2.77129e+08	1931.39	1447.21	1953.93	1372.04	1440.42	1206.87	1680.23	1910.04	1433.8	1571.66	1373.38	1332.63	1137.46	1389.73	1448.71
P50503	Hsc70-interacting protein OS=Rattus norvegicus GN=St13 PE=1 SV=1 - [F10A1_RAT]	41.2534	4.24531e+08	2.67654e+08	318833848	3.20058e+08	3.71375e+08	1.956e+08	1.50311e+08	321517031	3.9674e+08	4.23957e+08	3.2686e+08	4.10863e+08	3.49559e+08	2.64803e+08	396614725	4.8639e+08	4.56487e+08	3.81755e+08	2.7899e+08	3.70908e+08	3.27355e+08	2.68312e+08	495267245	3.11445e+08	3.88819e+08	4.5664e+08	4.34801e+08	3.04083e+08	3.25187e+08	4.75634e+08	2.94395e+08	3.72642e+08	1916.24	1093.3	1227.53	1057.2	1136.5	727.433	688.3	1115.59	1363.61	1334.14	1070.49	1239.19	1013.22	966.932	1171.89
Q920P6	Adenosine deaminase OS=Rattus norvegicus GN=Ada PE=1 SV=3 - [ADA_RAT]	39.8741	240819692	2.58919e+08	3.00665e+08	294304155	2.95145e+08	2.39089e+08	3.28239e+08	2.63538e+08	1.81039e+08	1.75095e+08	2.06025e+08	2.0645e+08	2.0681e+08	1.88263e+08	2.25895e+08	246102593	2.9097e+08	2.58858e+08	2.95786e+08	2.23002e+08	2.84831e+08	2.13938e+08	3.00934e+08	3.41612e+08	1.92851e+08	2.10593e+08	1.97531e+08	1.91655e+08	2.35329e+08	2.0937e+08	1.98658e+08	2.37252e+08	1913.18	1485.25	2239.01	1707.21	1915.67	1749.01	2499.61	1847.61	894.095	1243.79	1125.35	1136.9	1133.82	1087.68	1161.97
P62494	Ras-related protein Rab-11A OS=Rattus norvegicus GN=Rab11a PE=1 SV=3 - [RB11A_RAT]	24.3784	4.8797e+08	6.43401e+08	6.95923e+08	773786467	6.7188e+08	6.60256e+08	7.88994e+08	7.9443e+08	742397115	7.90644e+08	8.28841e+08	7.92203e+08	8.48708e+08	7.33712e+08	8.92744e+08	977075086	9.65543e+08	8.51199e+08	1.0433e+09	1.04178e+09	1.00462e+09	9.75339e+08	1164110337	1.19368e+09	7.9318e+08	9.17517e+08	9.37327e+08	9.45065e+08	9.79759e+08	1.01574e+09	1.15369e+09	1.04033e+09	1909.32	1676.16	1812.4	1878.49	1291.65	1372.16	1671.69	1679.78	1856.82	1744.44	1682.17	1633.84	1481.88	1947.4	1655.21
Q63768	Adapter molecule crk OS=Rattus norvegicus GN=Crk PE=1 SV=1 - [CRK_RAT]	33.824	5.40583e+08	424346502	599598730	6.2842e+08	4.84824e+08	4.24572e+08	5.0603e+08	648669811	3.40343e+08	3.22796e+08	4.61355e+08	4.9835e+08	4.79487e+08	3.87598e+08	6.60931e+08	7.22078e+08	556008682	3.32569e+08	6.83335e+08	601491856	5.953e+08	5.39551e+08	7.75387e+08	7.1402e+08	3.45432e+08	5.2564e+08	6.03153e+08	6.51726e+08	5.92166e+08	6.04062e+08	6.638e+08	6.23891e+08	1908.54	1515.05	2160.41	2132.61	2276.39	1490.53	1984.21	2732.87	1546.7	1656.71	1618.46	1627.1	1517.55	1384.49	1728.08
P47875	Cysteine and glycine-rich protein 1 OS=Rattus norvegicus GN=Csrp1 PE=2 SV=2 - [CSRP1_RAT]	20.5998	3.72602e+08	8.91683e+08	4.88701e+08	7.70492e+08	4.5361e+08	1104970314	5.31234e+08	4.48653e+08	1.29316e+09	1203464499	1.29863e+09	1.06858e+09	1.57627e+09	1.2739e+09	1.16445e+09	1458814748	1.46851e+09	1.07854e+09	1.87318e+09	1.78403e+09	2126763095	1.83195e+09	1.68541e+09	1.80318e+09	8.61488e+08	8.16213e+08	713241472	7.73335e+08	7.19063e+08	8.23233e+08	1.09935e+09	1.18222e+09	1904.01	2423.46	2510.05	2609.09	1949.85	3431.72	2260.55	2602.75	3349.75	3327.35	3452.7	3191.04	3601.77	3559.31	2917.9
Q9WVR7	Protein phosphatase 1F OS=Rattus norvegicus GN=Ppm1f PE=2 SV=1 - [PPM1F_RAT]	49.1348	8.52803e+07	1.05597e+08	9.35056e+07	1.28719e+08	9.86995e+07	1.53121e+08	1.05274e+08	1.05365e+08	1.0479e+08	8.14896e+07	1.00455e+08	9.55922e+07	1.06617e+08	1.09719e+08	1.82236e+08	1.3199e+08	1.09108e+08	8.61127e+07	9.19987e+07	1.17986e+08	1.48198e+08	9.82522e+07	1.74863e+08	1.35583e+08	7.03215e+07	5.64252e+07	5.13041e+07	5.88339e+07	5.96711e+07	1.41581e+08	6.05473e+07	7.98321e+07	1899.97	1548.24	2124.16	2170.43	1269.84	1376.57	2110.68	1495.34	1313.19	1306.84	1223.97	1441.15	1342.82	1213.5	1346.58
P02793	Ferritin light chain 1 OS=Rattus norvegicus GN=Ftl1 PE=1 SV=3 - [FRIL1_RAT]	20.7357	3.32347e+08	3.13024e+08	4.09093e+08	4.02678e+08	4.26615e+08	3.55921e+08	4.12638e+08	3.96262e+08	3.40025e+08	2.52207e+08	3.15263e+08	3.58751e+08	3.73234e+08	3.3178e+08	4.37652e+08	4.69776e+08	4.77546e+08	4.12763e+08	4.03685e+08	5.09328e+08	4.2835e+08	429373198	5.65217e+08	5.45054e+08	3.93414e+08	4.19225e+08	4.46636e+08	4.40183e+08	5.39953e+08	596201580	551553765	4.05999e+08	1890.16	1937.42	2174.16	2499.01	2047.83	1964.45	2444.97	2871.99	1881.61	2367.29	2487.2	2951.86	2636.82	2465.85	2727.63
Q6P9V9	Tubulin alpha-1B chain OS=Rattus norvegicus GN=Tuba1b PE=1 SV=1 - [TBA1B_RAT]	50.1196	1.85359e+08	7.33885e+08	3.13014e+08	7.02397e+08	2.14852e+08	1.24126e+09	2.27834e+08	2.51972e+08	9.57939e+08	7.63054e+08	8.1396e+08	7.7575e+08	1.18166e+09	9.12597e+08	7.13061e+08	1.07387e+09	1587976988	1248912855	2.17508e+09	2.1842e+09	2.46811e+09	2.07247e+09	1.89872e+09	2.51971e+09	9.22039e+08	1.04309e+09	6.61355e+08	7.91679e+08	7.56137e+08	8.1634e+08	1.24849e+09	1.24523e+09	1887.23	4690.03	2519.66	3455.81	2030.16	5374.44	1533.09	1515	4841.14	4512.15	4336.77	4226.76	5351.92	4922.07	3573.63
P02680	Fibrinogen gamma chain OS=Rattus norvegicus GN=Fgg PE=1 SV=3 - [FIBG_RAT]	50.6005	4.73762e+09	5179700752	5.84507e+09	5.72024e+09	5.50504e+08	7.55743e+08	5.43704e+09	6.27483e+09	8.59189e+09	7829717716	9.93421e+09	9.83493e+09	9.44003e+09	7.03247e+09	9.7856e+09	1.12291e+10	9.4168e+09	3.7049e+08	1.08893e+10	1.0161e+10	9.80934e+09	8.64354e+09	1.11423e+10	1.19512e+10	8765456043	9.02472e+09	1.01025e+10	1.08482e+10	1.01439e+10	8.32519e+09	1.16755e+10	1.20347e+10	1875.35	5165.16	4508.1	4589.47	4486.15	4669.2	3595.05	2274.94	5405.5	4630.49	6173.47	5988.09	6636.07	6009.94	5652.24
O54975	Xaa-Pro aminopeptidase 1 OS=Rattus norvegicus GN=Xpnpep1 PE=1 SV=1 - [XPP1_RAT]	69.6131	2.04963e+08	1.8643e+08	2.51064e+08	2.68795e+08	2.32733e+08	2.16815e+08	2.35079e+08	2.2295e+08	127301334	1.23668e+08	1.26872e+08	1.50013e+08	1.5751e+08	1.58922e+08	1.82167e+08	2.21355e+08	1.502e+08	1.62245e+08	1.47998e+08	1.99374e+08	1.985e+08	1.58878e+08	221532089	2.23143e+08	1.85829e+08	2.13979e+08	220314645	1.85544e+08	2.1293e+08	2.22446e+08	2.44984e+08	2.33281e+08	1874.59	1523.45	2293.12	1644.06	2056.13	1854.76	2347	1882.72	809.291	928.313	1093.11	1147.97	1042.31	1152.72	1248.89
P05712	Ras-related protein Rab-2A OS=Rattus norvegicus GN=Rab2a PE=1 SV=1 - [RAB2A_RAT]	23.5207	2.38612e+08	320719251	3.31722e+08	416331624	342459342	3.86388e+08	350960720	3.04978e+08	5.2687e+08	4.88813e+08	554220928	5.07999e+08	6.44083e+08	5.67135e+08	6.33505e+08	8.25139e+08	5.96628e+08	5.47792e+08	7.77433e+08	730718973	8.55127e+08	7.27155e+08	797740842	9.35821e+08	6.15803e+08	6.56261e+08	6.85054e+08	719891969	7.66209e+08	7.56468e+08	8.10068e+08	8.55528e+08	1837.24	1731.04	2142.56	1805.53	1613.72	1361.45	2130.55	2149.54	1995.76	2291.44	2161.71	1992.04	1830.8	1784.21	2150.42
Q64303	Serine/threonine-protein kinase PAK 2 OS=Rattus norvegicus GN=Pak2 PE=1 SV=1 - [PAK2_RAT]	57.9238	1.48942e+08	1.69878e+08	1.81383e+08	1.99458e+08	1.73834e+08	1.61893e+08	2.05367e+08	1.69518e+08	1.36744e+08	1.404e+08	1.60319e+08	1.71084e+08	1.36505e+08	1.29907e+08	1.81155e+08	1.81467e+08	1.59017e+08	1.45976e+08	1.65822e+08	175447887	1.57964e+08	1.52693e+08	1.91513e+08	2.02184e+08	1.37441e+08	1.47554e+08	1.74303e+08	1.77551e+08	197942002	1.98189e+08	1.97247e+08	2.06034e+08	1834.76	1444.77	2223.26	2194.88	2331.78	1815.73	2843.13	2305.47	1315.75	1612.2	1632.93	1431.35	1588.92	1527.31	1628.4
Q99MI7	NEDD8-activating enzyme E1 catalytic subunit OS=Rattus norvegicus GN=Uba3 PE=1 SV=1 - [UBA3_RAT]	51.6903	1.22902e+08	1.10022e+08	1.58882e+08	1.45546e+08	1.24179e+08	1.14916e+08	1.50863e+08	1.58368e+08	78078282	1.07555e+08	9.23513e+07	8.26414e+07	1.0014e+08	8.39277e+07	1.40129e+08	1.32932e+08	93252724	9.10018e+07	8.21339e+07	9.45066e+07	9.77423e+07	8.90733e+07	1.03712e+08	1.06696e+08	9.37397e+07	1.32831e+08	1.02687e+08	1.18387e+08	1.1932e+08	1.14153e+08	1.25884e+08	1.10512e+08	1822.97	1123.55	1758.51	1363.29	1431.88	994.182	1940.39	1954.1	634.755	671.835	615.669	563.08	810.854	756.446	1000.62
Q07936	Annexin A2 OS=Rattus norvegicus GN=Anxa2 PE=1 SV=2 - [ANXA2_RAT]	38.6538	1.03189e+08	1.45034e+09	1.7936e+08	9.38787e+08	4.7041e+08	2.4209e+09	2.61141e+08	2.38278e+08	1.5773e+09	9.95131e+08	1.2913e+09	1.04914e+09	2.09543e+09	1.48348e+09	1.25235e+09	1.88271e+09	1758513868	1.03555e+09	3.20676e+09	2.83021e+09	3.44324e+09	2.53723e+09	2.47726e+09	2.72787e+09	2.59828e+09	2.88893e+09	1.58534e+09	2.10096e+09	1.65063e+09	1.70035e+09	3.40349e+09	3.64948e+09	1817.04	6991.25	2751.67	5192.66	3348.97	7368.97	2546.42	2972.3	6030.69	5162.14	6142.58	5282.21	7990.23	6537.57	5400.11
Q6AYD4	Endothelial cell-selective adhesion molecule OS=Rattus norvegicus GN=Esam PE=1 SV=1 - [ESAM_RAT]	41.9099	2.05589e+08	2.07603e+08	2.752e+08	2.79089e+08	2.61002e+08	2.53425e+08	277380439	3.05674e+08	1.20352e+08	1.20403e+08	1.38099e+08	132447835	1.31481e+08	1.13815e+08	1.58654e+08	1.84738e+08	1.47744e+08	1.28095e+08	1.44392e+08	1.43666e+08	1.42906e+08	1.25607e+08	1.71984e+08	1.89097e+08	134444769	1.24259e+08	1.53374e+08	162294375	1.70038e+08	1.50537e+08	1.76083e+08	1.65279e+08	1810.48	1446.12	1712.31	1526.53	1522.93	1395.65	1763.7	1931.47	766.197	744.421	656.197	777.904	641.249	698.847	826.783
P80067	Dipeptidyl peptidase 1 OS=Rattus norvegicus GN=Ctsc PE=1 SV=3 - [CATC_RAT]	52.2017	3.50518e+08	3.07732e+08	3.62325e+08	3.45517e+08	4.13317e+08	3.08451e+08	4.04406e+08	3.50083e+08	5.4618e+08	5.02822e+08	5.06143e+08	5.24816e+08	5.59898e+08	5.57997e+08	6.1517e+08	7.27866e+08	6.72008e+08	5.9137e+08	8.42307e+08	7.35156e+08	821650311	7.35631e+08	802088467	7.63062e+08	6.92447e+08	7.33956e+08	7.38106e+08	6.54045e+08	7.83532e+08	8.07871e+08	837572460	7.37004e+08	1807.44	1126.73	1723.04	1318.76	1895.88	756.317	1914.16	1924.61	1435.28	1482.03	1455.54	1452.53	1449.91	1152.99	1569.68
Q64537	Calpain small subunit 1 OS=Rattus norvegicus GN=Capns1 PE=1 SV=3 - [CPNS1_RAT]	28.5519	288271580	3.11356e+08	3.78555e+08	4.21639e+08	382979527	3.65033e+08	3.91453e+08	4.088e+08	4.0474e+08	3.34524e+08	3.8733e+08	3.91327e+08	4.59837e+08	3.69089e+08	4.7115e+08	5.54583e+08	4.82615e+08	3.98889e+08	5.45006e+08	4.9115e+08	5.64332e+08	5.29245e+08	6.1153e+08	6.13503e+08	4.40087e+08	5.26523e+08	5.4688e+08	4.53828e+08	5.43576e+08	6.04265e+08	6.64017e+08	5.64543e+08	1794.02	1690.46	2697.99	2671.58	2387.21	1961.83	2788.18	3061.73	1533.06	1747.83	1747.99	2788.88	2180.02	2400.45	2185.7
Q5BK56	Glutathione S-transferase Mu 4 OS=Rattus norvegicus OX=10116 GN=Gstm4 PE=2 SV=1 - [GSTM4_RAT]	25.5369	1.39781e+09	1.07102e+09	1.32668e+09	1.56939e+09	1.56645e+09	1.39088e+09	1.60579e+09	1482525946	1313070008	1.12019e+09	1.14597e+09	1.2105e+09	1.45964e+09	1.42394e+09	1.8737e+09	1.82593e+09	1.22608e+09	1.13877e+09	1314490233	1.32996e+09	1556196525	1.42603e+09	1.80875e+09	1.74287e+09	1.27353e+09	1431451851	1.63259e+09	1.58381e+09	1.54327e+09	1.71703e+09	1.82576e+09	1.53047e+09	1780.18	1397.46	2171.79	1918.79	2053.76	1607.5	2193.95	2300.64	1546.72	1309.27	1610.26	1528.91	1715.41	1564.81	1802.46
P04904	Glutathione S-transferase alpha-3 OS=Rattus norvegicus GN=Gsta3 PE=1 SV=3 - [GSTA3_RAT]	25.3033	5.68716e+08	5.45703e+08	8.24707e+08	7.93879e+08	7.11424e+08	8.28098e+08	9.71491e+08	8.31406e+08	1.39909e+09	1.20519e+09	1.83262e+09	1.91937e+09	1571017779	1.4239e+09	2.27254e+09	2.69904e+09	1.81201e+09	1.31032e+09	2.18485e+09	1.78345e+09	2.04434e+09	1.68e+09	2.25405e+09	2.67188e+09	1.50643e+09	1.777e+09	1.88337e+09	1.83784e+09	2.36559e+09	2.14138e+09	2.23205e+09	2.09231e+09	1765.07	1888.38	1865.29	2059.04	1963.97	1914.86	2337.89	2159.89	3218.21	3201.99	3850.51	3870.56	3957.39	3820.77	4313.04
Q7TP47	Heterogeneous nuclear ribonucleoprotein Q OS=Rattus norvegicus GN=Syncrip PE=2 SV=1 - [HNRPQ_RAT]	59.6735	4.7983e+08	7.23185e+08	6.82363e+08	7.92479e+08	6.5682e+08	8.44277e+08	6.50273e+08	6.91602e+08	9.90347e+08	5.70607e+08	1164788474	7.57675e+08	1.37242e+09	1158704025	9.69135e+08	1.09212e+09	7.9959e+08	6.48477e+08	1.04596e+09	7.79236e+08	8.79167e+08	7.58339e+08	1.18478e+09	1363971631	6.90341e+08	699338024	8.25123e+08	7.62162e+08	940940577	9.39574e+08	1.07416e+09	1.10499e+09	1746.91	1729.91	1862.41	2110.09	2094.36	1860.13	2211.73	2327.02	1725.16	1533.53	1614.31	1908.25	1742.4	1817.96	2043.71
Q5BK81	Prostaglandin reductase 2 OS=Rattus norvegicus GN=Ptgr2 PE=2 SV=2 - [PTGR2_RAT]	38.1121	2.25901e+08	197551562	3.12121e+08	3.23758e+08	2.64492e+08	2.74707e+08	2.74125e+08	2.58738e+08	2.71707e+08	2.44908e+08	2.81862e+08	3.18098e+08	2.95397e+08	2.45328e+08	330005985	4.55622e+08	3.21739e+08	2.80538e+08	3.40561e+08	3.1654e+08	3.7489e+08	2.80697e+08	4.3889e+08	4.33006e+08	278281125	3.05568e+08	2.91697e+08	3.22301e+08	3.85552e+08	3.14338e+08	376844373	3.35786e+08	1746.71	1327.05	2427.79	1787.42	1730.42	1380.34	2118.94	2259.55	1509.15	1711.79	1518.86	1863.8	1546.52	1502.41	1915.51
P85125	Polymerase I and transcript release factor OS=Rattus norvegicus GN=Ptrf PE=1 SV=1 - [PTRF_RAT]	43.882	2.00302e+08	6.05119e+08	5.62244e+08	350430249	2.49461e+08	6.94531e+08	2.27666e+08	2.79383e+08	4.67025e+08	6.95611e+08	7.5432e+08	7.23356e+08	5.17963e+08	4.30821e+08	9.13092e+08	5.47555e+08	9.12939e+08	5.07717e+08	9.54549e+08	1.04952e+09	8.51106e+08	7.86826e+08	1.17744e+09	1194520218	6.89371e+08	3.92197e+08	4.04806e+08	7.9789e+08	337609542	9.90084e+08	1.02013e+09	5.383e+08	1745.14	3289.12	1644.23	2553.94	2020.74	3104.21	1258.96	1726.13	2241.53	2544.83	2006.49	2096.03	1969.56	1973.5	1706.73
P29266	3-hydroxyisobutyrate dehydrogenase, mitochondrial OS=Rattus norvegicus GN=Hibadh PE=1 SV=3 - [3HIDH_RAT]	35.2796	1.3338e+08	1.37407e+08	1.60541e+08	1.53025e+08	1.51171e+08	1.50482e+08	1.66226e+08	1.34411e+08	1.56866e+08	1.72787e+08	1.7534e+08	1.76172e+08	2.24465e+08	1.9005e+08	261383033	2.77515e+08	2.16658e+08	1.97539e+08	246285279	2.53109e+08	2.58942e+08	2.18968e+08	1.40663e+09	1.50772e+09	2.68129e+08	2.7795e+08	315053970	2.81085e+08	3.17835e+08	3.277e+08	3.6362e+08	3.27607e+08	1729.3	1258.83	2440.53	1741.56	1784.33	1401.3	2810.07	2378.64	1489.48	1325.56	1873.7	1824.92	1483.69	1501.33	2230.27
Q63525	Nuclear migration protein nudC OS=Rattus norvegicus GN=Nudc PE=1 SV=1 - [NUDC_RAT]	38.3883	3.19915e+08	2.63387e+08	3.51627e+08	3.66625e+08	3.63976e+08	3.38012e+08	3.97988e+08	3.23662e+08	4.04233e+08	3.70093e+08	3.90499e+08	4.37779e+08	4.05587e+08	3.99646e+08	5.13612e+08	546517090	4.54269e+08	3.3818e+08	4.9685e+08	4.8535e+08	5.78975e+08	4.87821e+08	6.41395e+08	6.72287e+08	4.07108e+08	3.62659e+08	4.69834e+08	4.37217e+08	4.72323e+08	494854256	5.062e+08	5.08033e+08	1729.16	1597.15	1840.83	1874.17	2129.23	1630.34	2247.71	2420.23	1375.58	1585.31	1942.4	1909.55	1808.34	1665.33	1943.63
Q3KRD8	Eukaryotic translation initiation factor 6 OS=Rattus norvegicus GN=Eif6 PE=2 SV=1 - [IF6_RAT]	26.5542	1.79592e+08	1.39287e+08	1.94538e+08	1.90436e+08	1.89172e+08	1.55964e+08	1.89191e+08	2.01188e+08	2.09038e+08	1.87768e+08	2.55105e+08	2.239e+08	2.29624e+08	2.00394e+08	2.63862e+08	2.93045e+08	2.83776e+08	247469257	2.71464e+08	239930303	2.39037e+08	1.87429e+08	2.75599e+08	2.68821e+08	2.37141e+08	2.3618e+08	2.77752e+08	268881136	2.98902e+08	2.57675e+08	3.10528e+08	2.57473e+08	1723.25	787.903	1577.64	786.373	856.538	673.703	1369.08	1056.7	1183.94	1128.34	1020.3	974.73	1013.67	912.092	1157.42
P01015	Angiotensinogen OS=Rattus norvegicus GN=Agt PE=1 SV=1 - [ANGT_RAT]	51.9489	1.84601e+08	1.59268e+08	2.02946e+08	2.30379e+08	2.06661e+08	1.91656e+08	2.21736e+08	2.15314e+08	3.48227e+08	3.11329e+08	3.76527e+08	4.14763e+08	392884285	3.64953e+08	4.49723e+08	4.90547e+08	3.75791e+08	3.71406e+08	3.59506e+08	3.27445e+08	4.12552e+08	3.46851e+08	4.73506e+08	4.09398e+08	360951582	405651015	3.66936e+08	4.24697e+08	4.56284e+08	4.42062e+08	4.1126e+08	3.91354e+08	1719.38	1491.45	1860.01	1434.43	1911.27	1857.01	2250.68	2014.2	2437.79	2778.63	2795.57	2766.63	2932.23	2819.65	2996.38
Q5U301	A-kinase anchor protein 2 OS=Rattus norvegicus GN=Akap2 PE=1 SV=1 - [AKAP2_RAT]	95.8823	1.12543e+08	1.31401e+08	8.50761e+07	124110451	1.10774e+08	1.56832e+08	5.20912e+07	5.08359e+07	120962616	1.1134e+08	8.39473e+07	9.47775e+07	1.08506e+08	9.48169e+07	8.54858e+07	1.18771e+08	1.8797e+08	1.31743e+08	1.61463e+08	1.64538e+08	182442518	1.45279e+08	1.66852e+08	1.1574e+08	1.15774e+08	9.91405e+07	8.22576e+07	9.03593e+07	1.17145e+08	1.10164e+08	1.01931e+08	94555948	1716.61	1189.1	1078.88	1117.81	1126.01	1007.47	579.264	948.585	1145.56	1044.21	538.171	817.192	748.246	1119.99	717.613
Q6AYZ1	Tubulin alpha-1C chain OS=Rattus norvegicus GN=Tuba1c PE=1 SV=1 - [TBA1C_RAT]	49.9055	1.65138e+08	6.62605e+08	2.74491e+08	6.41807e+08	1.80886e+08	1.22151e+09	2.00874e+08	2.29271e+08	8.89012e+08	6.66376e+08	7.46838e+08	6.81677e+08	1.11513e+09	8.96724e+08	6.87597e+08	1.01174e+09	1.4956e+09	1120414867	1976370507	2.01548e+09	2.31404e+09	2.07247e+09	1.89315e+09	2.40903e+09	8.73947e+08	9.62606e+08	633772178	7.63773e+08	6.93286e+08	7.94722e+08	1.20377e+09	1.19161e+09	1714.95	4492.03	2322.87	3263.35	2040.14	5073.42	1345.53	1573.01	4526.1	4291.92	3987.55	4032.85	4941.12	4628.97	3338.62
Q497B0	Omega-amidase NIT2 OS=Rattus norvegicus GN=Nit2 PE=1 SV=1 - [NIT2_RAT]	30.6817	2.23845e+08	1.57128e+08	2.48747e+08	2.01583e+08	2.33094e+08	1.8876e+08	2.77313e+08	2.63377e+08	1.75467e+08	1.99285e+08	2.0295e+08	209701808	2.12309e+08	1.98068e+08	2.59234e+08	2.66138e+08	2.36874e+08	2.42457e+08	2.70998e+08	2.44315e+08	2.71383e+08	2.3805e+08	3.11113e+08	3.04778e+08	1.6308e+08	2.16569e+08	2.21029e+08	207139315	2.64981e+08	2.43842e+08	257276459	2.32008e+08	1714.76	1336.6	1772.39	1172.73	1988.24	1285.77	1793.97	2065.83	1226.04	1246.39	1191.56	1117.29	1203.77	1185.51	1260.44
B5DF91	ELAV-like protein 1 OS=Rattus norvegicus GN=Elavl1 PE=1 SV=1 - [ELAV1_RAT]	36.1461	2.18926e+08	2.29644e+08	2.54043e+08	3.25125e+08	2.63168e+08	3.08355e+08	2.80364e+08	2.63021e+08	3.45446e+08	3.54068e+08	3.65462e+08	3.71748e+08	4.29319e+08	3.48574e+08	429122925	5.0051e+08	4.32826e+08	4.251e+08	5.08512e+08	4.4415e+08	5.79485e+08	4.7738e+08	5.75811e+08	5.78399e+08	3.25253e+08	3.62418e+08	3.68549e+08	3.39914e+08	417165350	4.33769e+08	5.10188e+08	4.61054e+08	1710.59	1352.87	1834.54	1642.36	1713.24	1567.96	1449.09	1683.03	1390.87	1294.21	1488.88	1678.68	1389.52	1350.3	1600.78
Q8VHK7	Hepatoma-derived growth factor OS=Rattus norvegicus GN=Hdgf PE=1 SV=2 - [HDGF_RAT]	26.4716	1.63604e+08	1.86169e+08	9.51832e+07	2.48763e+08	2.87497e+08	3.00825e+08	2.6182e+08	2.52388e+08	2.31505e+08	2.17642e+08	3.06549e+08	1.58306e+08	3.20502e+08	3.06397e+08	3.52161e+08	3.45242e+08	3.12603e+08	2.87167e+08	410159638	3.62583e+08	431015896	2.91284e+08	4.23353e+08	4.17534e+08	3.53859e+08	2.31198e+08	3.97944e+08	3.47627e+08	2.79728e+08	3.18842e+08	3.74579e+08	360501526	1703.23	842.585	1152.47	1094.5	1193.83	1112.32	539.798	819.347	1903.51	1695.4	1258.25	1445.03	984.068	1291.6	629.39
P21708	Mitogen-activated protein kinase 3 OS=Rattus norvegicus GN=Mapk3 PE=1 SV=5 - [MK03_RAT]	43.0531	3.64697e+08	2.99869e+08	2.28866e+08	2.47619e+08	1.97757e+08	2.47513e+08	2.26627e+08	1.63972e+08	3.29502e+08	3.18579e+08	3.94695e+08	3.88279e+08	250636624	2.17735e+08	228363518	4.15716e+08	242909036	2.77137e+08	3.01144e+08	2.70076e+08	2.95623e+08	258771038	2.80146e+08	4.10273e+08	320263956	3.0392e+08	2.55683e+08	3.85975e+08	3.19553e+08	2.6599e+08	3.29738e+08	2.97366e+08	1701.07	1703.37	2212.06	2089.45	1410.6	1510.29	2132.78	1893.13	1473.03	1460.48	1781.1	1868.32	1718.5	1405.39	1800.35
Q9QVC8	Peptidyl-prolyl cis-trans isomerase FKBP4 OS=Rattus norvegicus GN=Fkbp4 PE=1 SV=3 - [FKBP4_RAT]	51.4178	97859575	8.14624e+07	1.21245e+08	1.18725e+08	8.58357e+07	6.924e+07	1.37951e+08	1.16057e+08	1.46811e+08	1.32019e+08	1.58599e+08	1.45338e+08	1.28084e+08	1.23411e+08	1.66325e+08	1.30095e+08	1.57964e+08	1.46123e+08	1.79497e+08	1.55671e+08	154348545	1.51508e+08	1.91941e+08	1.88762e+08	1.56035e+08	1.42503e+08	1.77282e+08	1.84309e+08	1.59295e+08	153483722	1.81505e+08	1.59944e+08	1699.91	1042.73	1764.12	1190.18	1259.97	825.997	1967.28	1328.84	1425.96	1478.35	1998.22	1443.7	1143.4	1296.69	1430.78
P14408	Fumarate hydratase, mitochondrial OS=Rattus norvegicus OX=10116 GN=Fh PE=1 SV=2 - [FUMH_RAT]	54.43	1.0752e+08	1.73322e+08	1.7237e+08	2.00555e+08	1.59702e+08	2.09533e+08	1.48673e+08	1.22118e+08	2.8078e+08	2.12969e+08	2.76889e+08	2.47804e+08	367021641	2.27134e+08	2.71859e+08	3.55417e+08	2.62256e+08	1.67854e+08	3.88645e+08	4.12295e+08	4.30551e+08	2.99894e+08	3.1985e+08	3.04081e+08	3.66801e+08	4.04236e+08	2.61362e+08	3.44486e+08	2.98373e+08	2.64591e+08	4.36796e+08	3.98363e+08	1696.29	1948.31	2654.34	2092.35	1802.63	1659.17	1886.52	1881.67	2600.7	2448.37	2576.19	2359.59	2667.58	1893.73	1882.42
Q9Z0V6	Thioredoxin-dependent peroxide reductase, mitochondrial OS=Rattus norvegicus GN=Prdx3 PE=1 SV=2 - [PRDX3_RAT]	28.2775	357215449	2.87931e+08	4.21892e+08	438365322	4.55366e+08	3.77303e+08	4.50577e+08	4.45613e+08	6.02624e+08	5.20926e+08	6.15542e+08	7.02429e+08	6.3767e+08	5.96599e+08	7.56786e+08	8.49885e+08	6.43111e+08	5.70566e+08	756552367	7.77267e+08	7.46488e+08	6.40432e+08	8.70495e+08	9.01694e+08	6.01898e+08	670668727	7.47635e+08	7.21071e+08	8.16666e+08	7.53927e+08	9.05827e+08	8.62936e+08	1691.6	917.512	1519.97	737.553	1395.89	750.201	1276.72	1484.59	1382.45	1221.98	1399.41	1474.56	1109	1139.79	1529.2
Q5XIG8	Serine-threonine kinase receptor-associated protein OS=Rattus norvegicus GN=Strap PE=1 SV=1 - [STRAP_RAT]	38.432	9.75255e+07	8.6327e+07	1.12769e+08	1.23185e+08	1.12289e+08	1.13099e+08	1.47499e+08	1.44973e+08	1.05462e+08	1.19976e+08	1.09277e+08	1.26124e+08	117159448	1.22007e+08	1.35873e+08	1.47332e+08	1.2633e+08	1.29117e+08	1.2802e+08	1.34535e+08	1.44921e+08	1.26401e+08	1.47949e+08	1.65903e+08	1.17607e+08	1.33873e+08	1.21857e+08	1.251e+08	175564567	1.67701e+08	1.67705e+08	1.54787e+08	1686.49	1409.88	1781.3	1792.7	1673.74	1339.3	2119.66	1867.94	1181.01	1187.97	1136.91	1161.37	1523.51	1410.94	1560.55
Q64361	Latexin OS=Rattus norvegicus GN=Lxn PE=1 SV=1 - [LXN_RAT]	25.5636	3.59731e+08	2.94986e+08	3.41015e+08	3.41747e+08	4.2463e+08	3.18722e+08	4.27166e+08	4.32406e+08	2.38517e+08	2.23183e+08	251337146	2.47221e+08	2.44173e+08	2.58647e+08	2.5628e+08	3.49739e+08	2.80073e+08	2.95302e+08	2.97129e+08	2.53284e+08	3.05146e+08	2.53255e+08	2.98029e+08	3.12609e+08	2.67258e+08	3.12056e+08	2.88317e+08	2.53324e+08	3.91677e+08	3.15842e+08	3.16432e+08	2.64367e+08	1686.29	924.336	1780.07	1382.44	1498.06	1120.63	1815.63	1497.48	638.835	866.983	559.493	441.169	701.24	739.568	847.896
Q9JI85	Nucleobindin-2 OS=Rattus norvegicus GN=Nucb2 PE=1 SV=1 - [NUCB2_RAT]	50.0592	1.89982e+08	1.04642e+08	9.97319e+07	1.06167e+08	1.36178e+08	2.69472e+07	3.23042e+07	8.87329e+07	1.96075e+08	1.88031e+08	1.09041e+08	1.68516e+08	1.12606e+08	6.54883e+07	1.2826e+08	1.54995e+08	2.19334e+08	1.70609e+08	8.75245e+07	1.42615e+08	9.14273e+07	7.15476e+07	1.83243e+08	8.94891e+07	1.39091e+08	1.52068e+08	1.39317e+08	7.31918e+07	6.74645e+07	1.38081e+08	5.13435e+07	9.44922e+07	1680.17	930.16	1000.46	1097.83	1268.75	210.428	290.285	1008.8	1503.4	1606.34	1058.83	1397.64	896.858	493.045	1268.87
Q7TPB1	T-complex protein 1 subunit delta OS=Rattus norvegicus GN=Cct4 PE=1 SV=3 - [TCPD_RAT]	58.0628	9.33489e+07	2.70966e+08	1.33365e+08	2.30106e+08	1.21204e+08	3.49926e+08	1.64599e+08	1.28948e+08	3.33214e+08	3.10099e+08	309366198	3.05262e+08	3.93742e+08	3.28989e+08	3.32247e+08	5.67964e+08	4.63079e+08	3.38149e+08	5.42168e+08	5.33303e+08	6.57658e+08	4.55047e+08	5.64229e+08	6.46215e+08	3.56729e+08	4.43728e+08	2.99853e+08	3.49435e+08	3.93328e+08	4.20372e+08	4.93456e+08	4.76503e+08	1678.98	3026.25	2159.89	2852.05	1890.43	2565.93	2058.07	2153.03	3003.52	3101.89	2731.15	2887.49	2842.16	2859.52	2226.64
P04897	Guanine nucleotide-binding protein G(i) subunit alpha-2 OS=Rattus norvegicus GN=Gnai2 PE=1 SV=3 - [GNAI2_RAT]	40.4731	1.67263e+08	3.77769e+08	2.21178e+08	3.61746e+08	1.68581e+08	4.29289e+08	1.76917e+08	1.32937e+08	3.50888e+08	3.54457e+08	3.33835e+08	3.31443e+08	6.22629e+08	3.50944e+08	3.13901e+08	3.99506e+08	4.57286e+08	3.54848e+08	5.32956e+08	4.59911e+08	660238653	5.1979e+08	6.99387e+08	6.01443e+08	3.56174e+08	3.83965e+08	2.94409e+08	3.58176e+08	3.66144e+08	3.84014e+08	4.94639e+08	4.8305e+08	1673.65	3386.96	2164.81	3152.3	1530.18	3264.57	1964.85	2047.33	3333.3	2664.85	2294.95	2474.63	2906.23	2481.34	1817.18
P97532	3-mercaptopyruvate sulfurtransferase OS=Rattus norvegicus GN=Mpst PE=1 SV=3 - [THTM_RAT]	32.9194	3.36848e+08	2.93693e+08	3.61282e+08	4.09308e+08	4.01327e+08	4.11938e+08	3.81918e+08	383824238	1.99651e+08	1.73196e+08	2.02001e+08	230498332	2.09154e+08	2.14437e+08	2.51659e+08	2.98537e+08	2.32004e+08	1.78468e+08	2.42646e+08	2.43357e+08	2.3187e+08	1.95866e+08	2.92348e+08	2.89527e+08	2.14043e+08	2.25788e+08	2.27498e+08	2.22202e+08	247254624	2.50249e+08	2.84721e+08	2.82313e+08	1671.21	1452.19	1798.14	1732.91	1439.83	1333.25	1896.99	1929.02	647.357	787.711	882.819	964.866	853.631	895.932	738.91
P97697	Inositol monophosphatase 1 OS=Rattus norvegicus GN=Impa1 PE=1 SV=2 - [IMPA1_RAT]	30.4914	1.30182e+09	4.85017e+08	6.46185e+08	6.17487e+08	6.27555e+08	5.71167e+08	6.40169e+08	6.18538e+08	526022746	4.78406e+08	5.26029e+08	5.7034e+08	5.46534e+08	5.27831e+08	629657059	7.20547e+08	586523171	5.247e+08	6.03179e+08	603386336	6.66427e+08	572220179	7.06567e+08	744960201	5.65325e+08	5.85524e+08	6.00051e+08	587772283	7.3335e+08	6.73851e+08	6.93297e+08	6.7733e+08	1658.14	1512.89	1622.38	1506.47	1645.03	1361.24	1943.31	1958.47	1254.98	1347.02	1366.58	1378.49	1450.54	1391.97	1468.62
P97584	Prostaglandin reductase 1 OS=Rattus norvegicus GN=Ptgr1 PE=2 SV=3 - [PTGR1_RAT]	35.6954	1.38269e+08	1.10326e+08	1.39529e+08	1.67723e+08	1.72362e+08	1.53426e+08	1.82492e+08	1.75813e+08	1.14565e+08	9.98357e+07	1.31551e+08	1.33146e+08	1.23656e+08	1.97406e+08	180135012	1.79515e+08	1.32372e+08	1.1223e+08	1.50479e+08	160019013	1.55364e+08	147853457	192895610	1.79572e+08	1.19736e+08	1.54041e+08	1.57651e+08	1.51832e+08	1.79928e+08	1.81196e+08	1.85235e+08	1.83434e+08	1651.41	1538.43	2004.36	1766.39	1850.53	1760.11	2262.28	2216.02	1459.59	1537.77	1341.29	1512.3	1604.73	1488.67	1617.03
P05544	Serine protease inhibitor A3L OS=Rattus norvegicus GN=Serpina3l PE=1 SV=3 - [SPA3L_RAT]	46.2481	3.00966e+08	1.85809e+08	2.27253e+08	3.13698e+08	3.05629e+08	2.38084e+08	2.42721e+08	3.17729e+08	6.14055e+08	4.66034e+08	4.67561e+08	5.7331e+08	5.06018e+08	4.26787e+08	5.79155e+08	5.96023e+08	5.81105e+08	427188049	3.39837e+08	5.19061e+08	3.95052e+08	427921650	4.71335e+08	4.70838e+08	5.05859e+08	4.60259e+08	5.8361e+08	4.30382e+08	5.48369e+08	6.40009e+08	5.72574e+08	6.1323e+08	1646.83	1203.39	1895.15	1688.56	1656.13	1149.31	1993.67	1908.2	2364.42	2641.05	2023.43	2473.08	2431.42	2144.22	2648.31
Q4FZY0	EF-hand domain-containing protein D2 OS=Rattus norvegicus GN=Efhd2 PE=1 SV=1 - [EFHD2_RAT]	26.7425	1.64104e+08	1.08196e+08	1.60446e+08	1.31239e+08	1.66772e+08	9.66431e+07	1.22783e+08	1.55457e+08	156683379	1.17037e+08	147751837	1.62561e+08	1.50458e+08	1.08771e+08	1361618175	2.06466e+08	197742224	1.32329e+08	1.771e+08	1.94145e+08	1.55822e+08	1.41046e+08	2.32247e+08	1.68095e+08	1.44006e+08	1.71699e+08	2.06407e+08	1.5354e+08	1.4058e+08	1.85646e+08	1.48498e+08	1.39602e+08	1642.68	1104.82	1646.09	1188.27	1031.69	599.679	1168.9	1086.14	1171.19	1168.3	1178.84	1457.93	1017.43	1045.98	1233.3
P05964	Protein S100-A6 OS=Rattus norvegicus GN=S100a6 PE=1 SV=3 - [S10A6_RAT]	10.0283	1.34252e+09	1.49777e+09	1.48543e+09	2.00739e+09	1.76543e+09	2.18796e+09	2.0455e+09	1.76879e+09	2.48005e+09	1.82841e+09	2.86381e+09	3.04517e+09	2.63028e+09	2.82433e+09	4.04091e+09	3.66144e+09	2.43535e+09	1.72688e+09	2.55047e+09	3.04063e+09	3.03167e+09	2.74201e+09	4.59211e+09	4.33449e+09	1.92692e+09	2.12039e+09	2.91673e+09	2.73483e+09	2.37969e+09	3.1429e+09	3.58884e+09	3162805566	1640.8	1630.66	1464.62	1942.36	2061.81	2137.96	1892.84	1826.75	2037.82	1789.23	2280.53	2548.13	2162.97	2502.78	2711.59
Q6P0K8	Junction plakoglobin OS=Rattus norvegicus GN=Jup PE=1 SV=1 - [PLAK_RAT]	81.7488	5.07792e+07	6.31552e+07	6.69181e+07	9.89947e+07	4.44843e+07	9.22197e+07	7.97004e+07	1.28948e+08	5.53018e+07	4.2336e+07	5.43344e+07	4.44289e+07	6.06421e+07	6.96476e+07	5.79916e+07	7.3756e+07	6.7341e+07	6.18733e+07	7.19193e+07	7.33061e+07	1.20372e+08	7.20144e+07	1.13096e+08	9.40077e+07	5.53343e+07	7.25525e+07	5.6076e+07	6.1003e+07	7.7688e+07	8.30848e+07	7.99269e+07	9.89725e+07	1638.27	1465.47	1932.2	2135.88	1197.66	1376.35	2107.15	2957.35	1004.29	1174.75	959.841	1438.67	1316.77	1252.43	1263.48
Q5PQN7	Protein LZIC OS=Rattus norvegicus GN=Lzic PE=2 SV=1 - [LZIC_RAT]	21.381	136885811	9.2985e+07	1.4965e+08	1.3702e+08	1.50989e+08	1.01483e+08	1.30167e+08	1.23881e+08	9.92714e+07	9.05436e+07	9.24771e+07	1.01115e+08	9.0029e+07	9.47643e+07	1.04487e+08	1.1933e+08	9.01467e+07	9.91404e+07	8.90726e+07	9.92836e+07	1.01825e+08	1.05437e+08	1.1834e+08	1.08068e+08	5.49628e+07	6.49329e+07	7.7327e+07	6.47673e+07	6.24607e+07	8.49334e+07	5.68016e+07	76738587	1636.03	834.969	1479.6	926.745	1498.13	862.87	1490.65	896.831	747.397	906.323	749.531	859.596	652.933	1043.26	1014.29
P69897	Tubulin beta-5 chain OS=Rattus norvegicus GN=Tubb5 PE=1 SV=1 - [TBB5_RAT]	49.639	1.59405e+08	6.13678e+08	2.4828e+08	5.72549e+08	2.35115e+08	1.03045e+09	1.98709e+08	2.6185e+08	1.04001e+09	7.70956e+08	8.05182e+08	5.11156e+08	1.23081e+09	9.45021e+08	7.45458e+08	9.77139e+08	1.71771e+09	1.08609e+09	1.84588e+09	1.79965e+09	2.22108e+09	1.81501e+09	1.56241e+09	1.82e+09	8.75497e+08	9.58144e+08	6.12241e+08	7.12135e+08	7.22537e+08	7.93958e+08	1.10491e+09	1.09513e+09	1625.56	4476.86	2193.49	3865.3	1357.79	6002.63	1608.89	2198.17	5314.19	5396.2	5449.07	4776.72	5916.92	5728.36	4265.14
Q4FZT9	26S proteasome non-ATPase regulatory subunit 2 OS=Rattus norvegicus GN=Psmd2 PE=2 SV=1 - [PSMD2_RAT]	100.124	4.68175e+07	1.08774e+08	7.32504e+07	2.03171e+08	6.56847e+07	204504047	1.40665e+08	8.28458e+07	1.03902e+08	9.22341e+07	9.15992e+07	1.00332e+08	1.86449e+08	1.56316e+08	1.0757e+08	159111767	1.47404e+08	1.07729e+08	1.65523e+08	183791819	2.28351e+08	1.59292e+08	1.80472e+08	2.04199e+08	1.41775e+08	1.87559e+08	1.47963e+08	1.96254e+08	1.79577e+08	1.62333e+08	2.67792e+08	2.34957e+08	1625.34	4883.84	2926.99	4988.98	1086.94	5150.55	2664.78	2838.92	4176.24	4523.62	4271.24	4134.71	4318.15	4066.25	3574.09
P06214	Delta-aminolevulinic acid dehydratase OS=Rattus norvegicus GN=Alad PE=1 SV=1 - [HEM2_RAT]	36.0084	1.47219e+08	2.98193e+08	2.27705e+08	4.0539e+08	3.0557e+08	3.55588e+08	2.38947e+08	2.39866e+08	2.80645e+08	2.10568e+08	3.04634e+08	2.38e+08	309179321	2.11268e+08	3.02809e+08	3.9804e+08	2.73511e+08	1.43241e+08	3.63885e+08	3.25227e+08	3.63323e+08	274524415	3.65966e+08	3.5728e+08	3.10492e+08	3.44684e+08	2.99017e+08	3.35529e+08	3.80384e+08	3.04813e+08	4.4083e+08	3.79319e+08	1624.9	2509.73	2833.09	2681.92	2740.19	2638.13	2610.36	2113.76	1792.68	1442.73	1581.65	1395.77	2322.57	2136.28	1993.3
P62959	Histidine triad nucleotide-binding protein 1 OS=Rattus norvegicus GN=Hint1 PE=1 SV=5 - [HINT1_RAT]	13.7681	5.81157e+08	4.08736e+08	4.48963e+08	4.92148e+08	4.99303e+08	5.90919e+08	3.11671e+08	5.37226e+08	1.13441e+09	9.43939e+08	987635941	1.07924e+09	1144298511	968210002	1.03041e+09	1.35296e+09	1.14294e+09	7.86047e+08	1.12608e+09	1.24532e+09	1.36127e+09	1.1147e+09	1.34283e+09	1166832329	8.50246e+08	9.1929e+08	7.9746e+08	8.32037e+08	7.90856e+08	883661576	466997915	5.54714e+08	1620.09	1370.48	1144.77	966.123	1668.08	1133.11	976.185	1375.72	1979.06	1747.46	1397.76	1966.22	1792.11	1476.29	1742.1
Q5U2Z3	Nucleosome assembly protein 1-like 4 OS=Rattus norvegicus GN=Nap1l4 PE=1 SV=1 - [NP1L4_RAT]	43.8895	2.21497e+08	2.2813e+08	2.57346e+08	2.65854e+08	2.60556e+08	2.56388e+08	2.95695e+08	2.94549e+08	2.25257e+08	1.87684e+08	2.22997e+08	233156461	2.50246e+08	2.0296e+08	2.71134e+08	2.68343e+08	2.90313e+08	2.55841e+08	2.9918e+08	3.01888e+08	3.34226e+08	2.95145e+08	3.38784e+08	3.38146e+08	2.38617e+08	2.49421e+08	2.61309e+08	2.31705e+08	268604147	3.12865e+08	3.14695e+08	313387804	1616.28	1627.16	1874.61	1716.19	1367.09	1288.08	1958.54	1802.92	1073.49	1093.15	800.522	1129.6	625.361	705.492	841.901
Q8VHF5	Citrate synthase, mitochondrial OS=Rattus norvegicus GN=Cs PE=1 SV=1 - [CISY_RAT]	51.8335	4.9671e+08	5.14462e+08	5.3099e+08	7.38621e+08	6.51101e+08	712224159	7.74279e+08	7.18037e+08	7.22129e+08	6.86244e+08	7.74868e+08	8.10913e+08	8.34085e+08	7.34219e+08	1.0775e+09	1.17313e+09	918658096	7.82578e+08	9.89287e+08	9.87343e+08	1.03972e+09	8.63688e+08	1.27761e+09	1.19185e+09	9.61927e+08	1.07705e+09	1.09908e+09	1.10487e+09	1.35439e+09	1.2446e+09	1.44659e+09	1.29737e+09	1603.8	1704.73	2011.19	2016.91	2397.22	2338.54	2304.03	2241.71	1976.91	2367.45	2503.01	2394.16	2376.26	2285.92	2665.82
P00564	Creatine kinase M-type OS=Rattus norvegicus GN=Ckm PE=1 SV=2 - [KCRM_RAT]	43.0178	2.7694e+08	2.08635e+08	2.37694e+08	3.49004e+08	200905547	2.55327e+08	3.60772e+08	2.78247e+08	9.8221e+07	7.58608e+07	7.54612e+07	0	0	6.33937e+07	0	7.79785e+07	2.3115e+08	2.01303e+08	2.64756e+08	2.64035e+08	2.08349e+08	2.0773e+08	3.43594e+08	2.71439e+08	0	0	7.36135e+07	8.24526e+07	8.16265e+07	8.51481e+07	1.59733e+08	0	1600.23	1301.05	1513.05	1498.71	1172.36	1100.26	1732.09	1512.21	78.38	76.16	113.304			100.81
P02466	Collagen alpha-2(I) chain OS=Rattus norvegicus GN=Col1a2 PE=1 SV=3 - [CO1A2_RAT]	129.486	1.64026e+08	1.5084e+08	1.52787e+08	1.82572e+08	2.01391e+08	1.60808e+08	1.66475e+08	1.84497e+08	2.07054e+08	1.85423e+08	2.15903e+08	2.22967e+08	3.34384e+08	2.63075e+08	2.51934e+08	3.06753e+08	2.36436e+08	2.54184e+08	2.30195e+08	7.05095e+08	2.66961e+08	2.06683e+08	3.15394e+08	4.58562e+08	1.90421e+08	2.07652e+08	1.99445e+08	2.22359e+08	4.07531e+08	2.18764e+08	2.59591e+08	3.9158e+08	1596.67	794.688	1062.26	884.98	1111.13	763.648	907.21	905.417	1187.78	913.548	1146.32	1142.07	1060.01	889.597	1051.06
P10860	Glutamate dehydrogenase 1, mitochondrial OS=Rattus norvegicus GN=Glud1 PE=1 SV=2 - [DHE3_RAT]	61.3773	2.76924e+08	2.9813e+08	3.6581e+08	4.01269e+08	3.58997e+08	3.77682e+08	4.34625e+08	4.16281e+08	4.76754e+08	4.04709e+08	5.37828e+08	6.08287e+08	5.71914e+08	2.58013e+08	3.87772e+08	6.78609e+08	8.09333e+08	4.68897e+08	4.87781e+08	4.24638e+08	3.05562e+08	3.51535e+08	4.63143e+08	4.62347e+08	3.37221e+08	2.84086e+08	6.88619e+08	6.19615e+08	620059130	7.81298e+08	616162193	4.57903e+08	1571.86	1938.16	1987	2204	1403.15	1783.59	2302.24	1975.15	1964.66	2086.54	1931.79	1935.12	2072.71	1684.76	1960.37
O70513	Galectin-3-binding protein OS=Rattus norvegicus GN=Lgals3bp PE=1 SV=2 - [LG3BP_RAT]	63.7015	1.07482e+08	8.60067e+07	1.35296e+08	1.31595e+08	1.2642e+08	1.08371e+08	1.5108e+08	1.49176e+08	1.37123e+08	1.19563e+08	160327678	1.39296e+08	1.54459e+08	1.25147e+08	1.77243e+08	1.70454e+08	1.55977e+08	1.42201e+08	1.53929e+08	1.4374e+08	1.61625e+08	145338046	1.60186e+08	1.8432e+08	1.53859e+08	1.51433e+08	162874798	1.53841e+08	2.16253e+08	193738507	198320637	1.82648e+08	1569.97	1372.45	1489.42	1444.22	1579.59	1014.95	1711.65	1702.19	1826.81	1687.89	1695.12	1815.21	1500.98	1886.4	2094.81
P13601	Aldehyde dehydrogenase, cytosolic 1 OS=Rattus norvegicus GN=Aldh1a7 PE=1 SV=2 - [AL1A7_RAT]	54.5249	5.41179e+08	5.71213e+08	1.24881e+10	7.38963e+08	6.9766e+08	5.60939e+08	738818004	7.46126e+08	8.58681e+08	11637866568	9.55204e+08	1.03377e+09	1.04357e+09	9.9851e+08	1.71214e+10	1.27652e+09	13619515839	9.41893e+08	1.14198e+09	1.20468e+09	1260259677	1.10648e+09	1.45588e+09	1.42529e+09	1.00556e+09	1.04651e+09	1.242e+09	1.1407e+09	1.30805e+09	1.251e+09	1.45527e+09	1.34548e+09	1568.93	1328.61	1851.4	1513.39	1443.41	1404.67	1699.96	1700.55	1540.3	1861.19	1885.8	1832.78	1496.23	1718.51	1793.79
P10536	Ras-related protein Rab-1B OS=Rattus norvegicus GN=Rab1b PE=1 SV=1 - [RAB1B_RAT]	22.1492	5.2566e+08	1.03411e+09	7.70146e+08	1.04863e+09	6.49624e+08	1.0752e+09	7.05835e+08	6.62291e+08	1425552755	1.26939e+09	1.36509e+09	1.46074e+09	1.5249e+09	1.37787e+09	1.38842e+09	1.66021e+09	1.68576e+09	1.32465e+09	1.86865e+09	1.93436e+09	2.01648e+09	1.89613e+09	2.00061e+09	2.18112e+09	1.49632e+09	1.48428e+09	1.47015e+09	1585174147	1.5685e+09	1.63224e+09	2.01196e+09	1938349297	1566.97	1565.55	1188.03	1478.19	1250.58	1418.88	1588.69	1403.94	1787.68	1849.71	1815.54	1754.84	1820.44	1722.25	1538.78
P16446	Phosphatidylinositol transfer protein alpha isoform OS=Rattus norvegicus GN=Pitpna PE=1 SV=2 - [PIPNA_RAT]	31.8871	2.17985e+08	1.86887e+08	2.52872e+08	2.20274e+08	2.06145e+08	180135024	2.36963e+08	2.02327e+08	1.98673e+08	1.78498e+08	2.35849e+08	1.92968e+08	2.04857e+08	1.79549e+08	2.19431e+08	2.08307e+08	2.3764e+08	200566654	2.49566e+08	2.62257e+08	2.81429e+08	2.38992e+08	2.63681e+08	1.94699e+08	227799088	2.43025e+08	2.51172e+08	2.19711e+08	2.11992e+08	2.4364e+08	2.68208e+08	2.43569e+08	1562.93	1310.82	1387.03	1063.6	1004.2	884.475	1349.01	1341.26	959.954	763.165	965.348	893.412	747.226	768.224	673.675
Q62736	Non-muscle caldesmon OS=Rattus norvegicus GN=Cald1 PE=1 SV=1 - [CALD1_RAT]	60.5478	2.35562e+08	4.46408e+08	2.91797e+08	4.20006e+08	4.02315e+08	7.15512e+08	4.52056e+08	3.54241e+08	4.07331e+08	3.82055e+08	5.47453e+08	5.14941e+08	6.43925e+08	5.33041e+08	5.79118e+08	6.19302e+08	5.86998e+08	4.13711e+08	7.79819e+08	6.80352e+08	7.35369e+08	7.43695e+08	7.91725e+08	814299937	4.78923e+08	5.03004e+08	6.40427e+08	6.85172e+08	5.03959e+08	7.27429e+08	8.92183e+08	827092598	1557.86	2311.56	1258.85	1960.66	1431.14	2657.13	985.207	1232.98	1295.01	1490.8	1333.86	1304	1712.69	1311.69	1142.83
Q4KLL0	Transcription elongation factor A protein 1 OS=Rattus norvegicus GN=Tcea1 PE=2 SV=1 - [TCEA1_RAT]	33.872	7.96439e+07	1.23036e+08	1.18037e+08	1.28752e+08	1.48351e+08	95626119	1.98587e+08	1.02963e+08	1.54393e+08	1.37933e+08	1.42035e+08	1.38007e+08	1.48641e+08	1.20804e+08	2.45725e+08	1.70547e+08	1.89826e+08	131126221	1.74073e+08	1.85372e+08	1.65631e+08	1.42028e+08	1.88431e+08	1.419e+08	1.54781e+08	1.754e+08	1.42965e+08	1.2874e+08	1.95975e+08	179626635	1.11032e+08	1.49613e+08	1557.06	1553.3	1445.26	1178.61	1108.55	919.343	1007.07	1380.67	1673.89	1450.6	1704.02	1579.84	1413.27	1237.08	1185.04
P86252	Transcriptional activator protein Pur-alpha (Fragments) OS=Rattus norvegicus GN=Pura PE=1 SV=1 - [PURA_RAT]	15.3126	2.15945e+08	2.33898e+08	2.64016e+08	2.89773e+08	286235242	2.49489e+08	2.70907e+08	2.6421e+08	2.79365e+08	2.20789e+08	291448563	2.64921e+08	2.9015e+08	2.35112e+08	290954757	3.65317e+08	3.37772e+08	2.72367e+08	2.95863e+08	3.25068e+08	3.52359e+08	2.76669e+08	3.48768e+08	4.0783e+08	2.3868e+08	2.93673e+08	2.72029e+08	3.15417e+08	395078912	322053877	3.76682e+08	3.23632e+08	1555.27	1479.73	1402.31	1313.66	1635.87	1017.41	1461.85	1286.24	1322.69	1081.41	1279.03	1238.07	1078.01	1287.82	996.92
Q5U2Q3	Ester hydrolase C11orf54 homolog OS=Rattus norvegicus OX=10116 PE=1 SV=1 - [CK054_RAT]	34.9704	2.72327e+08	1.85683e+08	294702202	2.83082e+08	3.11529e+08	2.33358e+08	3.40017e+08	3.07351e+08	2.1837e+08	1.11352e+09	2.41501e+08	2.37926e+08	2.64493e+08	1.16432e+09	3.12882e+08	3.42752e+08	302631040	2.4469e+08	3.07086e+08	1.55775e+09	3.05573e+08	264673661	3.94672e+08	3.52739e+08	2.32067e+08	2.68716e+08	3.06341e+08	3.05023e+08	1.10332e+09	3.13567e+08	3.31827e+08	2.99376e+08	1551.85	929.442	1832.48	1334.44	1727.69	789.308	1769.25	1731.1	935.651	858.398	1049.63	1082.46	807.721	816.423	1127.99
Q5PPN5	Tubulin polymerization-promoting protein family member 3 OS=Rattus norvegicus OX=10116 GN=Tppp3 PE=2 SV=1 - [TPPP3_RAT]	18.9677	4.57735e+08	6.96181e+08	3.56604e+08	5.7172e+08	5.45967e+08	7.16581e+08	3.58531e+08	2.84475e+08	6.49594e+08	5.72376e+08	4.95194e+08	519667555	6.78394e+08	6.04743e+08	4.55559e+08	6.25199e+08	7.60692e+08	4.9869e+08	5.3315e+08	5.12684e+08	7.82178e+08	6.07914e+08	5.56336e+08	6.09274e+08	5.59945e+08	6.4332e+08	4.1776e+08	5.11375e+08	6.184e+08	6.16375e+08	5.016e+08	5.72936e+08	1548.69	1668.34	1365.43	1342.05	1633.31	1310.39	1337.01	1419.27	1418.87	1404.84	1198.63	1498.01	1377.99	1352.75	1204.33
P24368	Peptidyl-prolyl cis-trans isomerase B OS=Rattus norvegicus GN=Ppib PE=1 SV=3 - [PPIB_RAT]	23.7875	3.30068e+08	714885635	4.74287e+08	6.58567e+08	6.37905e+08	943405883	5.07905e+08	4.99821e+08	1.23759e+09	1.01378e+09	1.31427e+09	1.28436e+09	1553680434	1.28567e+09	1.39844e+09	1.73137e+09	1.51366e+09	1.31613e+09	1.74505e+09	1.67205e+09	1.95185e+09	1.60392e+09	1.79779e+09	2.01237e+09	1.29299e+09	1.4328e+09	1.25361e+09	1384836487	1.50785e+09	1449621947	1.84975e+09	1821474495	1546.59	2246.42	1877.05	1938.03	1819.16	2248.08	1906.03	1882.4	2792.68	2478.82	2660.14	2715.62	2539.41	2284.62	2147.09
Q64611	Cysteine sulfinic acid decarboxylase OS=Rattus norvegicus OX=10116 GN=Csad PE=1 SV=1 - [CSAD_RAT]	55.2135	5.66707e+07	5.80196e+07	6.50133e+07	8.32992e+07	5.76083e+07	8.6277e+07	6.7926e+07	7.04001e+07	4.31262e+07	4.24491e+07	4.85763e+07	6.31215e+07	6.06422e+07	6.26801e+07	7.28215e+07	8.56671e+07	5.34518e+07	4.83341e+07	5.24212e+07	5.8888e+07	6.86876e+07	5.75566e+07	7.90347e+07	8.92656e+07	4.10995e+07	6.66299e+07	61909284	5.82738e+07	8.04882e+07	5.98228e+07	5.75098e+07	7.51869e+07	1540.23	1505.53	1493.28	1129.48	1040.89	1225.78	1254.75	1188.03	701.364	1049.54	963.751	966.88	947.712	1045.74	1042.98
Q6PEC0	Bis(5'-nucleosyl)-tetraphosphatase [asymmetrical] OS=Rattus norvegicus GN=Nudt2 PE=2 SV=3 - [AP4A_RAT]	16.9186	173631694	1.36388e+08	2.33004e+08	1.77312e+08	2.28915e+08	1.3462e+08	1.69286e+08	2.18714e+08	1.74995e+08	1.55158e+08	1.85669e+08	1.95581e+08	2.14062e+08	1.44996e+08	1.8021e+08	2.70481e+08	2.06939e+08	145326672	2.79607e+08	1.61791e+08	2.30388e+08	1.61926e+08	1.93556e+08	3.22498e+08	1.49389e+08	1.96947e+08	3.56344e+08	2.21304e+08	2.45256e+08	1.74237e+08	3.1018e+08	2.36388e+08	1531.12	705.118	1356.61	945.259	1253.53	390.61	1233.17	1779.02	948.889	938.794	770.135	676.524	735.994	557.793	754.488
Q66HG4	Aldose 1-epimerase OS=Rattus norvegicus GN=Galm PE=1 SV=1 - [GALM_RAT]	37.8692	1.89541e+08	1.88005e+08	2.09881e+08	2.17021e+08	2.45137e+08	1.80174e+08	2.49293e+08	2.41325e+08	2.35438e+08	2.29783e+08	2.69976e+08	2.58241e+08	2.53947e+08	214353008	3.16175e+08	3.36287e+08	2.87321e+08	2.8265e+08	3.19332e+08	2.72387e+08	3.19079e+08	2.71008e+08	3.59787e+08	3.67648e+08	2.57737e+08	2.45729e+08	2.78465e+08	2.78497e+08	3.21088e+08	3.08818e+08	3.31097e+08	3.18021e+08	1525.82	968.256	1526.55	1370.7	1239.94	898.125	1606.36	1536.84	1356.74	1250.41	1247.46	1334.93	1073.15	1209.85	1334.76
P13803	Electron transfer flavoprotein subunit alpha, mitochondrial OS=Rattus norvegicus GN=Etfa PE=1 SV=4 - [ETFA_RAT]	34.9295	5.81056e+07	3.50405e+08	347485121	3.90022e+08	3.97509e+08	4.50089e+08	8.17433e+07	3.54436e+08	7.34007e+08	2.25332e+08	7.50973e+08	8.01058e+08	3.10498e+08	8.38376e+08	8.51807e+08	3.5061e+08	3.78193e+08	3.29115e+08	5.02191e+08	8.5819e+08	9.17911e+08	7.46397e+08	1.06634e+09	5.99391e+08	2.97901e+08	3.29545e+08	7.55551e+08	7.67039e+08	8.74429e+08	8.92385e+08	5.50015e+08	1008488584	1522.71	2073.96	1682.87	1996.62	1393.92	2086.76	1719.92	1637.18	3492.14	3537.09	3169.33	3442.27	3849.14	3619.24	3033.47
Q99MS0	SEC14-like protein 2 OS=Rattus norvegicus GN=Sec14l2 PE=1 SV=1 - [S14L2_RAT]	46.1366	1.23155e+09	9.44115e+08	1.42133e+09	1.47564e+09	1309131989	1.17389e+09	1.37215e+09	1.36412e+09	6.76752e+08	5.73377e+08	5.65721e+08	5.83612e+08	6.59936e+08	4.52684e+08	6.35439e+08	7.5631e+08	1.10358e+09	8.59286e+08	9.77994e+08	8.67888e+08	9.2701e+08	6.2977e+08	1.08496e+09	8.07143e+08	9.96105e+08	1.19758e+09	1.07712e+09	9.39054e+08	1.35047e+09	1.15931e+09	9.32552e+08	9.97453e+08	1519.8	1352.11	1826.83	1445.37	1301.53	1228.35	1648.52	2029.23	1073.95	1060.39	1094.72	1194.23	885.969	811.473	972.78
Q792H5	CUGBP Elav-like family member 2 OS=Rattus norvegicus GN=Celf2 PE=2 SV=1 - [CELF2_RAT]	54.2361	1.30425e+08	1.33407e+08	1.42682e+08	1.53272e+08	1.72459e+08	1.01868e+08	1.31152e+08	1.81438e+08	1.50779e+08	1.51165e+08	1.42721e+08	1.7613e+08	1.78509e+08	1.37759e+08	2.13131e+08	2.35211e+08	2.04789e+08	1.89645e+08	1.70906e+08	1.99287e+08	190615383	1.70584e+08	2.30491e+08	208738692	1.77375e+08	1.95559e+08	2.16636e+08	1.76315e+08	1.96049e+08	2.17034e+08	1.97153e+08	2.0963e+08	1507.97	623.718	1542.7	1044.6	1291.1	572.084	1257.81	1257.83	809.706	1119.32	768.836	971.917	926.234	1028.65	1246.52
Q66HL2	Src substrate cortactin OS=Rattus norvegicus GN=Cttn PE=1 SV=1 - [SRC8_RAT]	56.9073	2.07835e+08	3.15169e+08	2.86882e+08	333627333	2.55437e+08	3.06034e+08	5.6581e+08	5.31143e+08	3.02193e+08	2.88683e+08	3.36971e+08	3.11168e+08	3.74064e+08	2.79384e+08	3.37643e+08	3.56698e+08	3.40171e+08	2.69182e+08	7.07876e+08	3.58804e+08	4.26913e+08	392324919	4.08625e+08	4.18881e+08	3.21053e+08	3.24299e+08	2.94847e+08	3.29959e+08	4.81497e+08	342758894	3.83463e+08	3.39102e+08	1506.97	1632.14	1912.87	1920.87	1650.79	1868.35	1529.08	1722.98	1428.26	1469.75	1449.42	1739.02	1804.62	1554.61	1672.59
Q10728	Protein phosphatase 1 regulatory subunit 12A OS=Rattus norvegicus GN=Ppp1r12a PE=1 SV=2 - [MYPT1_RAT]	115.213	4.79615e+08	1.78575e+08	1.76265e+08	3.20235e+08	2.95781e+08	2.99505e+08	4.81502e+08	1.41739e+08	2.65986e+08	2.00264e+08	2.192e+08	3.15148e+08	2.93229e+08	2.46472e+08	4.94159e+08	4.54236e+08	2.24523e+08	1.81114e+08	2.52112e+08	3.08701e+08	4.64959e+08	3.69684e+08	4.31231e+08	5.88811e+08	2.33091e+08	3.72714e+08	1.79847e+08	7.176e+08	294943384	2.13429e+08	1.23155e+09	4.28075e+08	1503.93	1534.67	1838.81	1606.23	1376.75	1817.48	1733.72	1945.5	1541.61	1630.22	1513.7	1922	1321.65	1277.87	1450.83
Q9Z1B2	Glutathione S-transferase Mu 5 OS=Rattus norvegicus GN=Gstm5 PE=1 SV=3 - [GSTM5_RAT]	26.6111	3.93439e+08	3.57359e+08	4.28823e+08	4.45046e+08	1.80858e+08	4.8189e+08	4.67617e+08	1.66206e+08	4.79368e+08	4.37688e+08	2.07105e+08	2.0437e+08	5.75908e+08	5.54488e+08	7.25564e+08	6.56768e+08	216770849	4.32546e+08	5.95649e+08	5.30557e+08	6.185e+08	9.17002e+08	6.70847e+08	6.82652e+08	4.47226e+08	4.8033e+08	6.30747e+08	6.06049e+08	2.81496e+08	688498487	6.97957e+08	6.22888e+08	1502.87	1718.54	1770.24	1958.51	1879.15	1633.04	1831.42	2030.57	1709.08	1871.31	1933.15	2087.12	2039.46	1650.54	2084.02
Q02253	Methylmalonate-semialdehyde dehydrogenase [acylating], mitochondrial OS=Rattus norvegicus GN=Aldh6a1 PE=1 SV=1 - [MMSA_RAT]	57.7706	8.10164e+07	1.20555e+08	1.24432e+08	1.41713e+08	1.29825e+08	1.45223e+08	1.19319e+08	1.04732e+08	1.76963e+08	1.56299e+08	2.12188e+08	2.0205e+08	2.04333e+08	2.03686e+08	2.11433e+08	2.43124e+08	2.30548e+08	1.98343e+08	2.22036e+08	2.49581e+08	3.03186e+08	2.41016e+08	3.47699e+08	3.07507e+08	2.29909e+08	2.51258e+08	2.55425e+08	2.59892e+08	309180056	2.95065e+08	3.39031e+08	3.16193e+08	1500.88	1886.97	2182.51	2371.12	1482.76	1759.52	1974.93	1478.35	2640.12	2469.29	2845.13	2830.37	2521.91	2224.87	2421.37
Q5I0D7	Xaa-Pro dipeptidase OS=Rattus norvegicus GN=Pepd PE=2 SV=1 - [PEPD_RAT]	54.7149	1.26731e+08	1.04398e+08	1.51674e+08	1.37762e+08	1.43409e+08	1.52365e+08	1.64276e+08	1.929e+08	1.70297e+08	1.76694e+08	1.47314e+08	1.68046e+08	2.87423e+08	3.36468e+08	3.24898e+08	3.55664e+08	2.34159e+08	2.05324e+08	2.12765e+08	2.35094e+08	2.99433e+08	4.21323e+08	2.52832e+08	4.79137e+08	1.86665e+08	2.36703e+08	2.23906e+08	1.85143e+08	3.1011e+08	314916965	4.11826e+08	2.96388e+08	1494	1126.14	1673.13	1375.94	1919.58	1386.93	2167.03	2225.54	1705.69	1879.88	1645.86	1831.81	2033.84	2001.21	2686.37
Q6PEC4	S-phase kinase-associated protein 1 OS=Rattus norvegicus GN=Skp1 PE=2 SV=3 - [SKP1_RAT]	18.6603	267412974	243193812	1.9129e+08	3.06812e+08	2.86833e+08	1.83236e+08	1.6689e+08	2.99656e+08	3.51809e+08	3.48559e+08	3.81046e+08	3.17134e+08	3.3979e+08	2.46834e+08	4.01495e+08	5.51072e+08	4.60184e+08	3.44018e+08	2.63288e+08	454778748	3.11091e+08	3.03673e+08	5.35965e+08	3.41765e+08	2.50103e+08	4.13104e+08	3.58222e+08	2.5782e+08	3.25251e+08	4.48881e+08	3.52779e+08	3.39944e+08	1489.91	749.434	968.104	814.328	1083.72	535.803	564.511	1337.76	1609.22	1341.56	1287.26	1553.93	1350.73	941.555	1494.08
P24587	A-kinase anchor protein 5 OS=Rattus norvegicus GN=Akap5 PE=2 SV=2 - [AKAP5_RAT]	75.9161	1.58913e+08	1.48489e+08	1.82307e+08	2.13671e+08	1.79886e+08	1.95414e+08	1.88104e+08	1.92941e+08	2.2527e+08	2.3176e+08	2.2694e+08	242416655	2.66786e+08	238297796	2.65337e+08	3.17387e+08	2.65056e+08	259943020	253525792	2.54036e+08	3.66084e+08	2.77088e+08	3.48739e+08	3.91603e+08	2.19567e+08	2.34969e+08	233423821	2.39051e+08	2.91428e+08	287804453	3.12918e+08	3.37598e+08	1480.14	1375.32	1646.84	1480.87	1674.22	1548.61	1801.69	1675.53	1430.53	1584.37	1580.96	1377.43	1543.56	1728.95	1576.72
P18614	Integrin alpha-1 OS=Rattus norvegicus GN=Itga1 PE=1 SV=1 - [ITA1_RAT]	130.726	1.41445e+08	2.47177e+08	1.56304e+08	2.39908e+08	281529294	336424506	2.07196e+08	3.02894e+08	1.09384e+08	9.50155e+07	1.14108e+08	1.19648e+08	2.49478e+08	2.33166e+08	2.40206e+08	2.96967e+08	1.07246e+08	9.69637e+07	1.36839e+08	2.99847e+08	3.10018e+08	1.27143e+08	3.24541e+08	3.24866e+08	264179658	2.90507e+08	2.93974e+08	2.66664e+08	3.24372e+08	3.42339e+08	3.50089e+08	3.39351e+08	1478.39	2099.39	1632.02	2063.33	1578.46	2178.6	1841.8	1633.81	1023.97	873.823	918.681	968.673	917.779	901.131	919.408
O88267	Acyl-coenzyme A thioesterase 1 OS=Rattus norvegicus OX=10116 GN=Acot1 PE=1 SV=1 - [ACOT1_RAT]	45.9839	1.08165e+08	1.28639e+08	1.23229e+08	151197734	1.26007e+08	1.71365e+08	1.56348e+08	150910777	1.56016e+08	1.58808e+08	2.00204e+08	1.81715e+08	1.91053e+08	1.22529e+09	2.29976e+08	1.7432e+09	2.28545e+08	1.90221e+08	1.26349e+09	2.48259e+08	2.68059e+08	2.19971e+08	2.77979e+08	2.97026e+08	2.09363e+08	2.51853e+08	2.44839e+08	2.15462e+08	2.98805e+08	2.6314e+08	2.87687e+08	2.76786e+08	1474.97	1139.4	1296.17	1166.94	1175.32	958.726	1082.52	1273.54	952.656	1168.24	983.951	1211.34	867.668	1026.14	1160.42
Q8K4F7	m7GpppX diphosphatase OS=Rattus norvegicus GN=Dcps PE=2 SV=1 - [DCPS_RAT]	38.6901	188344415	1.63203e+08	2.1067e+08	2.18545e+08	2.40986e+08	2.16518e+08	2.16439e+08	2.31659e+08	2.32224e+08	1.73383e+08	225931166	2.47341e+08	2.61444e+08	2.33925e+08	2.90499e+08	3.33073e+08	2.67231e+08	1.92276e+08	2.38781e+08	253593072	2.79537e+08	2.50634e+08	3.27183e+08	3.42236e+08	2.14902e+08	2.31746e+08	2.26592e+08	2.36434e+08	2.7085e+08	2.5183e+08	3.02492e+08	2.81181e+08	1473.78	1106.2	1864.29	1514.52	1504.47	1092.1	1592.23	2010.99	1142.54	1412.2	1343.25	1408.56	1021.58	1439.12	1592.12
Q5XIM7	Lysine--tRNA ligase OS=Rattus norvegicus OX=10116 GN=Kars PE=1 SV=1 - [SYK_RAT]	71.5776	3.86065e+08	450992652	4.33213e+08	3.00954e+08	2.00888e+08	4.63439e+08	1.76261e+08	3.84456e+08	1.62627e+08	1.32135e+08	5.48475e+08	5.6564e+08	5.09871e+08	1.72243e+08	585994064	3.05325e+08	1.76634e+08	2.00448e+08	1.97539e+08	5.53615e+08	698562296	1.97474e+08	3.28726e+08	2.90815e+08	240782368	2.48138e+08	2.53378e+08	522224074	2.71703e+08	2.84131e+08	3.24082e+08	2.62597e+08	1473.62	1321.34	1828.63	1542.9	1541.46	1276.09	1728.01	2080.54	1259.26	1630.66	1445.46	1851.21	1568.3	1694.25	1822.59
Q4V7C7	Actin-related protein 3 OS=Rattus norvegicus GN=Actr3 PE=1 SV=1 - [ARP3_RAT]	47.327	1.47631e+08	3.43564e+08	2.47373e+08	3.59137e+08	1.36813e+08	4.2421e+08	1.21588e+09	2.16336e+08	2.6906e+08	2.02913e+08	2.49643e+08	2.34152e+08	3.63838e+08	2.94726e+08	2.62906e+08	3.05099e+08	2.95973e+08	2.24047e+08	4.14447e+08	4.36027e+08	4.53036e+08	3.69555e+08	2.90917e+08	3.87476e+08	4.34559e+08	4.48619e+08	3.08875e+08	1.06843e+09	3.1488e+08	329855633	521966876	4.82969e+08	1470.73	2220.19	1638.27	2088.26	670.274	2425.07	1961.2	1562.59	1709.67	1591.18	1701.31	1818.51	1865.14	1876.27	1556.08
P20767	Ig lambda-2 chain C region OS=Rattus norvegicus OX=10116 PE=4 SV=1 - [LAC2_RAT]	11.3106	1.86071e+08	2.49843e+08	2.86306e+08	3.04345e+08	3.10207e+08	3.82898e+08	3.24655e+08	2.54062e+08	3.39865e+08	2.51279e+08	3.89398e+08	3.39765e+08	4.12333e+08	3.45313e+08	4.3793e+08	4.95091e+08	3.64589e+08	2.35667e+08	4.57554e+08	3.97685e+08	4.6728e+08	4.18496e+08	4.95186e+08	4.8473e+08	4.30222e+08	4.59275e+08	4.43394e+08	5.15069e+08	5.09905e+08	4.96724e+08	6.31317e+08	6.12571e+08	1467.67	1439.05	1775.83	1673.85	1416.98	1453.3	1545.8	1416.09	1621.72	1684.69	1860.4	1657.95	1610.27	1620.7	1262.97
O35568	EGF-containing fibulin-like extracellular matrix protein 1 OS=Rattus norvegicus GN=Efemp1 PE=1 SV=1 - [FBLN3_RAT]	54.5602	1.14431e+08	1.18491e+08	4.25191e+08	1.2046e+08	1.48129e+08	1.46172e+08	541697397	4.43222e+08	1.96313e+08	1.45448e+08	1.82556e+08	1.51104e+08	2.31471e+08	1.41431e+08	1.66003e+08	1.73526e+08	317994106	2.30041e+08	2.87577e+08	1.60381e+08	2.07065e+08	1.6885e+08	1.8986e+08	1.89181e+08	2.08076e+08	1.69426e+08	1.61144e+08	1.87487e+08	224391540	2.30964e+08	1.61127e+08	2.12637e+08	1457.67	1018.84	1235.94	1349	1419.4	977.8	1447.41	1611.95	1483.13	1521.68	1233.42	1480.39	1322.91	1425.47	1349.72
Q64119	Myosin light polypeptide 6 OS=Rattus norvegicus GN=Myl6 PE=1 SV=3 - [MYL6_RAT]	16.9641	4.48387e+08	4.7427e+08	3.22293e+08	5.92003e+08	4.64188e+08	6.09816e+08	2.42524e+08	3.9543e+08	9.74052e+08	9.44366e+08	7.90268e+08	8.67383e+08	1.07641e+09	8.86499e+08	9.6214e+08	1150350074	1.14198e+09	1.01143e+09	1.1174e+09	1.14945e+09	1.31638e+09	1.13917e+09	1507388516	1.33956e+09	8.64669e+08	9.91418e+08	8.7563e+08	8.25208e+08	9.63648e+08	1.08284e+09	1.03508e+09	1.20623e+09	1455.65	1449.45	1393.97	1498.1	1116.38	1352.9	1197.13	821.935	2249.75	2136.91	1861.17	2193.11	2055.96	1914.9	1627.14
Q68FQ0	T-complex protein 1 subunit epsilon OS=Rattus norvegicus GN=Cct5 PE=1 SV=1 - [TCPE_RAT]	59.4988	8.45844e+07	1.49673e+08	1.1128e+08	1.51232e+08	8.95054e+07	1.90802e+08	9.98204e+07	8.59743e+07	2.00802e+08	1.60639e+08	1.78461e+08	1.64447e+08	2.15123e+08	1.67688e+08	1.95604e+08	2.79099e+08	2.77509e+08	1.84112e+08	3.69024e+08	3.08171e+08	3.58146e+08	2.72244e+08	3.62478e+08	3.53828e+08	2.04853e+08	2.39584e+08	1.782e+08	194922536	2.28508e+08	2.10296e+08	3.03735e+08	2.73249e+08	1449.62	1821.87	1956.94	1824.57	1022.87	1670.74	1597.26	1989.84	2190.5	1799.78	2138.88	2364.03	1973.93	2103.51	1671.03
P08649	Complement C4 OS=Rattus norvegicus GN=C4 PE=1 SV=3 - [CO4_RAT]	192.042	9.47521e+07	1.5725e+08	1.18841e+08	249204501	3.02834e+08	2.21418e+08	1.22427e+08	1.8241e+08	3.03392e+08	2.60892e+08	328143356	3.22183e+08	3.75113e+08	3.02588e+08	3.43054e+08	4.02766e+08	3.32635e+08	2.76083e+08	4.47239e+08	3.56858e+08	5.25085e+08	3.54063e+08	5.0229e+08	4.83052e+08	3.77655e+08	4.86918e+08	4.52645e+08	4.03766e+08	4.38464e+08	5.04228e+08	569522946	5.37755e+08	1445.59	3127.31	2118.68	2572.28	1682.43	3057.12	2294.72	1727.45	4623.28	4825.16	4883.04	4841.08	5890.34	5049.4	4907.28
Q811X6	Lambda-crystallin homolog OS=Rattus norvegicus OX=10116 GN=Cryl1 PE=1 SV=3 - [CRYL1_RAT]	35.318	1.11624e+08	1.11142e+08	145098427	1.35548e+08	1.44298e+08	1.16208e+08	1.60115e+08	1.43821e+08	1.29833e+08	1.19244e+08	1.28156e+08	1.26803e+08	1.39987e+08	133765843	1.94463e+08	2.02464e+08	1.57478e+08	1.54844e+08	1.71951e+08	1.62071e+08	1.6652e+08	1.3505e+08	2.29205e+08	1.95353e+08	1.48631e+08	1.63952e+08	1.66304e+08	1.59725e+08	1.95983e+08	2.07233e+08	2.15856e+08	2.01115e+08	1443.3	777.263	1167.38	816.447	1080.94	381.714	1279.69	1315.57	798.359	719.736	650.421	699.617	632.219	770.232	939.783
Q6P9T8	Tubulin beta-4B chain OS=Rattus norvegicus GN=Tubb4b PE=1 SV=1 - [TBB4B_RAT]	49.769	202805336	5.1811e+08	2.90138e+08	5.16766e+08	2.90823e+08	8.30555e+08	2.77197e+08	3.12496e+08	8.52979e+08	6.85813e+08	742396516	5.66666e+08	1042937440	8.398e+08	7.84795e+08	1.01161e+09	1.36862e+09	9.70968e+08	1709370140	1.79965e+09	1.84714e+09	1.67465e+09	1.50961e+09	1.7874e+09	7.7765e+08	846481937	6.30996e+08	7.12135e+08	6.55492e+08	7.35431e+08	1.04372e+09	1.11193e+09	1437.95	4171.07	1807.77	3532.06	1152.6	5916.22	1422.25	2167.46	5294.37	5272.92	4897.54	4324.59	5962.87	5495.77	4025.07
Q6P799	Serine--tRNA ligase, cytoplasmic OS=Rattus norvegicus GN=Sars PE=1 SV=3 - [SYSC_RAT]	58.5508	1.24699e+08	1.34803e+08	1.95835e+08	1.87684e+08	1.52974e+08	1.79008e+08	1.50737e+08	129099750	2.17003e+08	2.10885e+08	2.13688e+08	2.60138e+08	2.42986e+08	2.24275e+08	2.58922e+08	3.00198e+08	2.58021e+08	213513429	2.59013e+08	2.64202e+08	2.60809e+08	227966979	3.24864e+08	2.97942e+08	2.16745e+08	2.80313e+08	2.44784e+08	2.80364e+08	289114356	310831269	3.26535e+08	3.01201e+08	1427.73	1662.26	2213.56	2319.41	1442.29	1669.19	2230.51	1960.79	2270.69	2099.96	1899.93	2496.25	1926.04	1932.72	2298.33
Q9WU82	Catenin beta-1 OS=Rattus norvegicus OX=10116 GN=Ctnnb1 PE=1 SV=1 - [CTNB1_RAT]	85.4002	7.77512e+07	9.65304e+07	8.49328e+07	1.28373e+08	9.69201e+07	1.23551e+08	1.08208e+08	1.0363e+08	7.69041e+07	7.56086e+07	8.04739e+07	8.7582e+07	8.9566e+07	7.47802e+07	8.87982e+07	1.18579e+08	1.07185e+08	8.86706e+07	1.12626e+08	1.29673e+08	1.50281e+08	107398622	1.55284e+08	1.34083e+08	9.3693e+07	1.14839e+08	9.87215e+07	9.76163e+07	125314189	1.32114e+08	135082292	1.27711e+08	1397.78	2386.64	2046.55	2930.14	2084.52	2356.77	2374.88	2712.5	1593.01	1776.13	1453.86	2024.56	1562.59	1775.65	1710.83
O55012	Phosphatidylinositol-binding clathrin assembly protein OS=Rattus norvegicus GN=Picalm PE=1 SV=1 - [PICAL_RAT]	69.2423	9.3649e+07	1.86984e+08	1.33051e+08	1.93002e+08	1.30846e+08	2.16704e+08	1.25689e+08	1.21498e+08	1.77929e+08	1.41889e+08	1.80187e+08	1.67457e+08	1.96499e+08	1.57933e+08	2.21933e+08	2.71304e+08	2.03231e+08	1.42293e+08	2.57326e+08	2.49325e+08	2.92903e+08	2.24082e+08	294223732	2.95207e+08	2.36703e+08	2.87809e+08	2.25774e+08	2.3664e+08	2.70472e+08	2.6136e+08	3.65473e+08	339125270	1388.16	1375.06	1489.33	1493.74	1406.99	1438.12	1880.86	1756.22	957.508	1182.72	1241.74	1530.3	1484.78	1407.92	1396.57
P61751	ADP-ribosylation factor 4 OS=Rattus norvegicus GN=Arf4 PE=2 SV=2 - [ARF4_RAT]	20.3836	3.16048e+08	6.25758e+08	3.43592e+08	6.1175e+08	3.66509e+08	8.08438e+08	3.46522e+08	2.7422e+08	9.03697e+08	8.75684e+08	9.86151e+08	7.98496e+08	852628905	8.45181e+08	7.49803e+08	9.96519e+08	1.3613e+09	9.49374e+08	1351135819	1.22172e+09	1.43862e+09	1.24181e+09	1.18768e+09	1479415938	8.9877e+08	1.09823e+09	8.12483e+08	8.37047e+08	982667979	9.17088e+08	1.12777e+09	9.898e+08	1383.25	2081.9	1418.03	1962.33	1016.3	2463.17	1153.7	1028.58	3421.53	3539.59	3054.48	3314.24	3737.93	3893.29	3462.35
P14173	Aromatic-L-amino-acid decarboxylase OS=Rattus norvegicus OX=10116 GN=Ddc PE=1 SV=1 - [DDC_RAT]	54.0184	1.01998e+08	1.02457e+08	1.10931e+08	1.4129e+08	1.33524e+08	1.35435e+08	1.45331e+08	1.48015e+08	8.36235e+07	7.0716e+07	8.81934e+07	1.0189e+08	9.13691e+07	8.86931e+07	1.02599e+08	121432436	84325766	8.08614e+07	68907430	8.46848e+07	9.05006e+07	7.46014e+07	1.15675e+08	9.53877e+07	7.5247e+07	87978600	7.76267e+07	7.0427e+07	8.63163e+07	9.16822e+07	8.86697e+07	8.47266e+07	1378.56	1034.24	1723.27	1491.59	1267.09	1029.92	1621.31	1572.31	650.134	629.947	599.66	585.359	417.694	395.78	708.761
P0C5E3	Palladin (Fragment) OS=Rattus norvegicus GN=Palld PE=1 SV=1 - [PALLD_RAT]	66.6631	1.42639e+08	1.49184e+08	1.48976e+08	1.68871e+08	1.59696e+08	1.42653e+08	1.69041e+08	1.55138e+08	2.11102e+08	1.96441e+08	2.29357e+08	2.00572e+08	2.24448e+08	2.08294e+08	2.23252e+08	2.4658e+08	2.54607e+08	2.22325e+08	2.53068e+08	2.5394e+08	2.99389e+08	2.61925e+08	2.59519e+08	2.81328e+08	2.26282e+08	2.45279e+08	2.37819e+08	2.51038e+08	2.70281e+08	284916220	2.76215e+08	2.69184e+08	1378.12	886.801	1094.85	928.231	1266.88	1086.13	1011.92	1314.96	1090.8	1164.68	951.326	1032.7	1268.08	778.595	1128.8
P14141	Carbonic anhydrase 3 OS=Rattus norvegicus OX=10116 GN=Ca3 PE=1 SV=3 - [CAH3_RAT]	29.4127	4.35289e+08	3.50756e+08	5.25071e+08	5.08416e+08	3.74705e+08	3.62407e+08	5.68485e+08	5.73891e+08	1.80583e+08	154935682	1.75259e+08	2.01598e+08	1.99622e+08	2.20748e+08	3.05156e+08	3.2629e+08	3.97469e+08	3.46591e+08	4.18745e+08	3.88371e+08	3.73578e+08	3.59201e+08	5.01324e+08	4.46807e+08	1.32117e+08	1.84492e+08	2.06123e+08	1.82069e+08	1.90543e+08	269428571	236423374	212659728	1376.03	1173.13	1859.17	1217.58	1397.95	1191.57	1746.12	1758.21	459.885	398.877	470.785	468.41	700.34	399.509	769.656
Q63569	26S protease regulatory subunit 6A OS=Rattus norvegicus GN=Psmc3 PE=2 SV=1 - [PRS6A_RAT]	49.1294	4.2231e+08	5.06758e+08	4.34495e+08	5.12242e+08	9.49221e+08	5.71833e+08	4.84847e+08	3.76596e+08	5.63747e+08	5.56143e+08	5.53319e+08	5.43552e+08	5.7586e+08	5.34501e+08	5.04609e+08	6.73433e+08	6.38821e+08	5.114e+08	5.18223e+08	4.87318e+08	6.86643e+08	5.25901e+08	6.34214e+08	6.61519e+08	5.64051e+08	5.55678e+08	4.4301e+08	4.78703e+08	6.01671e+08	5.50853e+08	5.95603e+08	6.24461e+08	1360.46	2029.3	1697.09	2414.45	740.498	2552.49	1683.06	1681.2	1751.52	2182.56	2104.24	2685.94	1888.44	2228.2	1857.88
F1MA98	Nucleoprotein TPR OS=Rattus norvegicus GN=Tpr PE=1 SV=1 - [TPR_RAT]	267.144	1.47713e+08	2.00285e+08	2.23485e+08	113702976	2.65169e+08	3.09442e+08	1.91691e+08	7.53222e+07	1.71544e+08	2.59645e+08	2.84702e+08	8.52477e+07	1.61501e+08	3.4567e+08	1.33681e+08	1.36676e+08	4.03079e+08	2.73075e+08	3.95604e+08	1.48302e+08	3.72902e+08	1.26193e+08	3.42544e+08	1.8851e+08	3.89421e+08	1.88351e+08	1.14238e+08	1.99178e+08	9.37592e+07	3.93207e+08	2.27942e+08	1.20956e+08	1357.57	1716.49	1811.34	2145.86	1627.08	1891.4	1843.6	1637.38	1666.55	1505.19	1619.74	1830.08	2148.13	2216.91	1492.14
Q3SWT0	Platelet endothelial cell adhesion molecule OS=Rattus norvegicus GN=Pecam1 PE=1 SV=1 - [PECA1_RAT]	76.1409	1.19318e+08	2.29109e+08	1.40778e+08	2.35816e+08	1.54327e+08	3.70591e+08	1.35301e+08	122632605	8.1129e+07	6.96526e+07	8.9805e+07	7.4427e+07	9.53752e+07	9.47411e+07	105623660	1.22653e+08	8.17973e+07	6.21833e+07	1.01367e+08	1.054e+08	1.08392e+08	9.73308e+07	9.83646e+07	1.18788e+08	9.73597e+07	1.07276e+08	1.09414e+08	8.67173e+07	1.13601e+08	1.14585e+08	1.53755e+08	1.32754e+08	1357.53	2415.61	1446.05	1578.03	615.068	2179.58	1310.82	1364.63	315.918	242.221	261.032	311.143	318.347	308.931	252.376
P22734	Catechol O-methyltransferase OS=Rattus norvegicus GN=Comt PE=1 SV=2 - [COMT_RAT]	29.5783	1.19098e+08	1.25757e+08	1.52723e+08	1.65968e+08	1.35527e+08	1.46527e+08	1.81762e+08	1.63237e+08	1.97857e+08	1.72405e+08	2.13837e+08	2.08044e+08	1.99769e+08	1.93081e+08	2.73816e+08	3.04932e+08	2.41547e+08	219361731	269152255	2.71444e+08	274494272	2.31951e+08	3.44856e+08	2.98084e+08	2.1053e+08	2.59855e+08	2.34016e+08	2.55153e+08	3.25007e+08	2.73195e+08	3.41818e+08	2.38038e+08	1348.11	1153.03	1586.11	1518.15	1220.48	1172.03	1626.99	1717.81	1056.72	1402.11	1605.58	1195.16	1511.97	1530.74	1580.98
Q6AYR8	Secernin-2 OS=Rattus norvegicus GN=Scrn2 PE=2 SV=1 - [SCRN2_RAT]	46.4721	8.16683e+07	7.40389e+07	9.46228e+07	1.04311e+08	7.83457e+07	8.46909e+07	1.11564e+08	6.78237e+07	7.20287e+07	7.63889e+07	8.11202e+07	8.492e+07	7.16181e+07	6.90171e+07	1.00731e+08	1.13458e+08	9.91802e+07	8.15528e+07	7.3263e+07	8.54982e+07	9.45592e+07	5.7616e+07	1.60326e+08	1.21642e+08	7.00469e+07	6.16352e+07	6.66137e+07	6.62609e+07	1.13342e+08	1.0011e+08	9.76423e+07	84125920	1347.97	955.395	1115.92	615.375	987.592	688.495	1283.52	877.267	823.862	977.587	692.269	954.293	493.371	641.93	497.916
Q63639	Retinal dehydrogenase 2 OS=Rattus norvegicus GN=Aldh1a2 PE=1 SV=2 - [AL1A2_RAT]	56.6038	3.56557e+08	3.191e+08	1.23968e+10	4.28712e+08	4.28411e+08	3.15759e+08	4.23532e+08	3.86146e+08	4.58512e+08	1.14142e+10	5.30858e+08	5.42807e+08	5.31251e+08	4.56923e+08	1.6851e+10	5.79203e+08	1.33621e+10	5.43186e+08	5.54129e+08	5.58789e+08	657403691	5.8796e+08	7.35269e+08	6.18022e+08	5.5897e+08	5.43659e+08	6.35171e+08	5.97594e+08	6.79115e+08	7.35764e+08	7.64008e+08	6.29487e+08	1346.26	994.544	1440.8	1010.61	1621.3	997.676	1662.79	1615.32	1017.23	934.875	1225.63	1168.02	954.925	867.918	1079.16
P02454	Collagen alpha-1(I) chain OS=Rattus norvegicus GN=Col1a1 PE=1 SV=5 - [CO1A1_RAT]	137.869	3.02221e+08	3.07424e+08	3.26879e+08	3.18708e+08	3.74885e+08	3.58907e+08	4.07382e+08	3.76751e+08	3.93108e+08	3.81507e+08	4.87846e+08	3.92313e+08	4.2024e+08	4.55288e+08	4.58053e+08	5.4465e+08	4.96303e+08	4.1677e+08	5.3355e+08	4.56979e+08	5.50906e+08	4.45737e+08	4.86733e+08	5.69113e+08	446277596	4.86374e+08	4.37471e+08	4.44489e+08	5.30812e+08	4.55776e+08	488913119	4.90457e+08	1334.33	1317.25	1805.23	1234.46	1451.95	1186.68	1914.48	1612.14	1494.73	1293.34	1749.05	1605.8	1544.76	1597.96	1357.76
Q62950	Dihydropyrimidinase-related protein 1 OS=Rattus norvegicus GN=Crmp1 PE=1 SV=1 - [DPYL1_RAT]	62.1566	1.1576e+09	1.65453e+09	1.72761e+09	1.79054e+09	1.59992e+09	1938949189	1.54124e+09	1.776e+09	1.6475e+09	1.61679e+09	1.82169e+09	1.80226e+09	1.82688e+09	1.81892e+09	2.07059e+09	2.42893e+09	1.7878e+09	1.49897e+09	1587434691	1.84397e+09	2.31278e+09	2.07692e+09	2411960219	2.16406e+09	1.34357e+09	1583659972	1796953052	1767057765	2000647048	2.09459e+09	2.33084e+09	2.1269e+09	1334.04	1487.22	1451.7	1436.3	1849.66	1618.3	1645.59	1594.05	1329.01	1410.61	1624.81	1514.38	1676.09	1548.43	1806.81
P84083	ADP-ribosylation factor 5 OS=Rattus norvegicus GN=Arf5 PE=1 SV=2 - [ARF5_RAT]	20.5166	3.66789e+08	7.57411e+08	4.59362e+08	7.96826e+08	4.50764e+08	1.05674e+09	4.4597e+08	3.71424e+08	1.00992e+09	9.01082e+08	9.91385e+08	8.25037e+08	9.32196e+08	951414623	8.07526e+08	1.12296e+09	1.41456e+09	1.02186e+09	1.35371e+09	1.2521e+09	1.43988e+09	1220880246	1.18768e+09	1.49672e+09	9.66148e+08	1.22082e+09	8.6566e+08	9.24444e+08	1.04091e+09	1014271077	1.18627e+09	1.10145e+09	1326.49	1698.75	1356.78	1928.05	1280.77	2060.28	1257.07	1317.97	2572	2663.19	2545.63	2474.97	2575.66	2756.94	2439.99
Q9EST6	Acidic leucine-rich nuclear phosphoprotein 32 family member B OS=Rattus norvegicus GN=Anp32b PE=2 SV=1 - [AN32B_RAT]	31.042	7.97345e+08	5.20802e+08	6.59745e+08	6.50545e+08	6.86639e+08	3.36658e+08	3.95151e+08	6.20842e+08	8.38316e+08	7.58596e+08	6.43389e+08	1.01922e+09	6.49583e+08	5.72312e+08	8.69493e+08	1.09132e+09	1.12063e+09	9.34898e+08	6.99692e+08	1.10567e+09	8.23378e+08	7.50398e+08	1206877169	8.18197e+08	8.81736e+08	9.38203e+08	972378672	7.69497e+08	7.61923e+08	1.0893e+09	8.2582e+08	887878001	1318.08	1483.39	1522.88	1522.18	1851.12	1253.64	1106.39	1713	1443.8	1340.15	1306.76	1285.05	1170.4	1346.22	1408.58
Q6I7R3	Isochorismatase domain-containing protein 1 OS=Rattus norvegicus GN=Isoc1 PE=2 SV=1 - [ISOC1_RAT]	31.982	1.08205e+08	1.06893e+08	1.20543e+08	1.42354e+08	1.43721e+08	1.5404e+08	1.29399e+08	1.28229e+08	1.09326e+08	8.87354e+07	1.22285e+08	1.20469e+08	1.14776e+08	1.05022e+08	1.60653e+08	1.90323e+08	1.30141e+08	1.01667e+08	1.38294e+08	1.32283e+08	1.8077e+08	1.12956e+08	1.89653e+08	1.74335e+08	1.22775e+08	1.45563e+08	1.12817e+08	1.35331e+08	1.9777e+08	1.59604e+08	1.91031e+08	1.56154e+08	1308.48	914.313	1002.5	1182.6	1103.02	956.036	1175.83	1057.24	1143.38	768.869	837.363	962.322	923.834	886.209	1066.67
Q68FR9	Elongation factor 1-delta OS=Rattus norvegicus GN=Eef1d PE=1 SV=2 - [EF1D_RAT]	31.3109	1.38264e+08	3.86376e+08	2.13236e+08	3.42094e+08	2.07043e+08	3.82932e+08	9.06376e+07	1.38007e+08	6.26702e+08	6.4143e+08	5.73978e+08	5.26509e+08	6.9039e+08	5.09255e+08	4.65949e+08	6.96301e+08	6.63182e+08	4.83815e+08	6.47584e+08	8.36377e+08	8.16307e+08	7.04731e+08	7.67127e+08	7.09311e+08	6.46685e+08	7.17716e+08	5.70357e+08	5.87681e+08	4.98731e+08	6.08445e+08	6.65077e+08	7.43107e+08	1303.1	2493.39	1634.11	1930.51	1464.31	2489.25	693.135	1108.92	3030.83	2592.61	2685.3	2487.44	2677.54	2357.58	2154.64
P22062	Protein-L-isoaspartate(D-aspartate) O-methyltransferase OS=Rattus norvegicus GN=Pcmt1 PE=1 SV=2 - [PIMT_RAT]	24.6257	2.56853e+08	2.1349e+08	3.00182e+08	3.13626e+08	2.87371e+08	271529774	3.27264e+08	2.95083e+08	2.75752e+08	2.33853e+08	2.80296e+08	3.20061e+08	2.85556e+08	2.51785e+08	3.29491e+08	3.79998e+08	3.12786e+08	2.44731e+08	2.96665e+08	3.28972e+08	3.6204e+08	3.09027e+08	5.87573e+08	5.5718e+08	2.68513e+08	3.18054e+08	3.04836e+08	3.35175e+08	3.74215e+08	5.49766e+08	4.09999e+08	5.18951e+08	1291.01	659.168	1460.5	1141.19	1059.37	649.481	1381.23	1546.86	794.147	682.669	1034.99	1250.36	799.623	809.747	948.729
P27605	Hypoxanthine-guanine phosphoribosyltransferase OS=Rattus norvegicus GN=Hprt1 PE=1 SV=1 - [HPRT_RAT]	24.4615	3.20044e+08	3.43601e+08	3.81129e+08	4.46868e+08	4.04186e+08	4.30486e+08	3.83519e+08	3.66644e+08	5.75281e+08	5.13866e+08	5.80722e+08	6.22892e+08	6.60925e+08	601160736	7.35043e+08	8.1209e+08	6.95076e+08	5.44324e+08	6.82581e+08	7.25026e+08	7.60204e+08	6.58387e+08	8.86087e+08	8.34854e+08	5.94784e+08	6.48676e+08	6.80111e+08	6.27575e+08	7.80871e+08	7.38261e+08	8.1773e+08	843391028	1284.18	1293.17	1551.11	1280.29	1393.33	1214.29	1421.01	1497.35	1340.93	1540.46	1382.56	1653.54	1346.94	1347.04	1587.41
Q63862	Myosin-11 (Fragments) OS=Rattus norvegicus GN=Myh11 PE=1 SV=3 - [MYH11_RAT]	152.398	3.45497e+08	3.85758e+08	2.7321e+08	4.09489e+08	4.17004e+08	2.66663e+08	1.66609e+08	3.73687e+08	6.3938e+08	5.94247e+08	5.87116e+08	735752523	7.33198e+08	5.86533e+08	2.31932e+09	8.47639e+08	9.78322e+08	7.87923e+08	9.10001e+08	1.0044e+09	8.40222e+08	9.02421e+08	9.56733e+08	8.37042e+08	5.59163e+08	6.34959e+08	5.23656e+08	6.49519e+08	5.61969e+08	6.2646e+08	6.32923e+08	7.10537e+08	1283.74	1930.61	1156.81	1525.1	1098.14	1408.58	1002.49	1422.13	2339.37	2331.82	1840.9	1829.13	2304.19	1760.75	1581.13
Q5PPH0	Enolase-phosphatase E1 OS=Rattus norvegicus GN=Enoph1 PE=2 SV=1 - [ENOPH_RAT]	28.8566	9.90996e+07	8.54834e+07	1.14959e+08	1.02059e+08	1.18637e+08	1.08288e+08	1.1786e+08	1.07881e+08	9.89087e+07	9.36753e+07	1.13679e+08	1.04531e+08	1.07783e+08	1.12031e+08	1.43834e+08	1.51645e+08	1.37243e+08	9.41081e+07	1.29578e+08	9.75291e+07	1.57383e+08	1.07776e+08	1.33564e+08	1.73e+08	1.00767e+08	1.10278e+08	1.05215e+08	8.71337e+07	1.29043e+08	1.48372e+08	1.13268e+08	1.12285e+08	1267.67	786.533	838.758	739.931	1119.82	453.704	1086.82	1215.39	669.289	528.605	643.95	581.223	886.502	485.114	692.465
Q9JJ22	Endoplasmic reticulum aminopeptidase 1 OS=Rattus norvegicus GN=Erap1 PE=2 SV=2 - [ERAP1_RAT]	106.351	1.14509e+08	8.19669e+07	111976417	1.11902e+08	1.2221e+08	1.12612e+08	1.34325e+08	1.1938e+08	1.19667e+08	8.32246e+07	1.32087e+08	2.15616e+08	119067212	1.15092e+08	1.63729e+08	1.99538e+08	1.18623e+08	1.09522e+08	1.2907e+08	1.28455e+08	1.4312e+08	1.39361e+08	1.71778e+08	1.83158e+08	1.25487e+08	155892115	1.81003e+08	1.708e+08	1.78295e+08	1.76133e+08	2.10594e+08	1.88719e+08	1262.41	1101.1	1349	1343.36	1341.09	1128.6	1592.76	1899.05	852.734	888.691	1303.98	1350.64	1210.5	1216.13	1476.83
P15800	Laminin subunit beta-2 OS=Rattus norvegicus GN=Lamb2 PE=2 SV=1 - [LAMB2_RAT]	196.347	4.35671e+07	7.13093e+07	4.64612e+07	8.48199e+07	6.56788e+07	1.11445e+08	2.14711e+08	1.32966e+08	8.66163e+07	7.33614e+07	1.73994e+08	7.70535e+07	2.00959e+08	1.61108e+08	1.97825e+08	2.45506e+08	1.86339e+08	9.65581e+07	3.32064e+08	2.87389e+08	2.71732e+08	2.4617e+08	2.60613e+08	2.94948e+08	2.20361e+08	2.12941e+08	1.62708e+08	2.68721e+08	2.26598e+08	2.43723e+08	3.03143e+08	3.31455e+08	1258.63	1566.54	1276.41	1586.62	951.715	2395.49	918.604	1119.43	1385.29	1416.79	1487.27	1391.38	2684.33	1127.23	1735
Q7TQ94	Deaminated glutathione amidase OS=Rattus norvegicus OX=10116 GN=Nit1 PE=2 SV=2 - [NIT1_RAT]	36.0701	135007009	1.41217e+08	1.46958e+08	2.28385e+08	2.71449e+08	3.08431e+08	2.23574e+08	2.27915e+08	2.22082e+08	1.75447e+08	2.50671e+08	2.28279e+08	222782532	1.96871e+08	3.02575e+08	5.07656e+08	248031243	2.87258e+08	2.55099e+08	2.6632e+08	2.85374e+08	3.66753e+08	3.03185e+08	5.09674e+08	2.16453e+08	2.57608e+08	219489078	2.35614e+08	3.38275e+08	2.58279e+08	2.91948e+08	3.09707e+08	1256.82	947.089	1579.16	1658.66	1377.73	1306.67	1734.85	2095.09	1161.72	1364.22	1324.47	1529.86	1415.7	1538.13	1629.65
Q921A4	Cytoglobin OS=Rattus norvegicus OX=10116 GN=Cygb PE=1 SV=1 - [CYGB_RAT]	21.483	1.31137e+08	1.46466e+08	1.47906e+08	1.8964e+08	1.73401e+08	2.01292e+08	1.742e+08	166524966	2.83843e+08	258446875	3.43762e+08	3.20039e+08	3.14162e+08	3.36439e+08	4.22364e+08	4.09366e+08	3.62008e+08	2.83018e+08	3.97379e+08	354794977	4.31053e+08	3.3347e+08	4.78662e+08	4.69218e+08	2.9628e+08	3.50192e+08	3.34896e+08	3.53432e+08	4.44138e+08	3.99131e+08	4.05687e+08	4.26806e+08	1254.22	922.546	1295.11	1198.26	1064.13	1234.32	1198.19	1343.48	1659.58	1418.45	1553.15	1735.95	1586.01	1705.48	1749.02
O70593	Small glutamine-rich tetratricopeptide repeat-containing protein alpha OS=Rattus norvegicus GN=Sgta PE=1 SV=1 - [SGTA_RAT]	34.1359	1.20287e+08	1.7619e+08	1.4774e+08	260340407	2.79224e+08	8.6539e+07	1.41738e+08	1.70963e+08	171717143	1.83515e+08	1.61674e+08	1.7784e+08	1.72445e+08	1.04073e+08	5.19774e+08	2.33772e+08	1.75195e+08	1.79182e+08	2.17205e+08	2.15575e+08	1.93193e+08	173855642	3.52803e+08	2.05816e+08	1.49325e+08	171199319	2.17366e+08	1.92203e+08	2.0887e+08	223957461	2.1598e+08	1.73885e+08	1247.15	959.345	1296.33	1320.18	1174.65	431.402	1726.29	1508.95	1230.62	1583.83	1311.11	1442.75	901.012	1071.2	1380.36
P08427	Pulmonary surfactant-associated protein A OS=Rattus norvegicus OX=10116 GN=Sftpa1 PE=1 SV=3 - [SFTPA_RAT]	26.2717	1.83852e+08	1.86647e+08	1.89993e+08	1.94073e+08	2.33413e+08	1.65323e+08	1.64445e+08	1.81903e+08	4.78623e+08	4.39054e+08	4.24004e+08	4.10853e+08	5.15386e+08	4.08473e+08	3.93449e+08	4.61535e+08	6.08039e+08	4.97905e+08	5.27545e+08	5.22036e+08	6.69849e+08	5.77397e+08	5.24867e+08	4.87735e+08	382648310	3.7593e+08	3.45641e+08	3.59131e+08	4.65295e+08	4.18467e+08	370104463	3.48076e+08	1239.95	1185.41	1268.78	1220.25	1174.14	362.995	1047.47	1019.71	1811.35	1804.03	1333.15	1584.38	1397.73	1331.34	1433.99
Q68FS2	COP9 signalosome complex subunit 4 OS=Rattus norvegicus GN=Cops4 PE=1 SV=1 - [CSN4_RAT]	46.2607	8.33393e+07	7.4957e+07	1.00731e+08	1.10878e+08	7.65868e+07	9.69348e+07	1.02699e+08	9.5291e+07	8.40285e+07	6.09526e+07	6.50382e+07	78551305	9.42722e+07	7.8915e+07	8.99292e+07	1.05332e+08	8.8767e+07	8.58342e+07	1.02646e+08	1.1038e+08	1.24044e+08	9.97053e+07	1.24127e+08	1.32613e+08	8.89626e+07	1.1291e+08	1.15649e+08	8.1138e+07	1.36564e+08	1.36844e+08	1.31856e+08	125420967	1232.07	920.952	1592.33	1173.79	639.085	589.756	1362.36	1101.86	956.846	664.135	705.361	1053.63	1021.1	942.22	824.14
Q920L2	Succinate dehydrogenase [ubiquinone] flavoprotein subunit, mitochondrial OS=Rattus norvegicus GN=Sdha PE=1 SV=1 - [SDHA_RAT]	71.5697	48083948	1.5209e+08	7.36374e+07	1.48705e+08	7.62255e+07	1.27536e+08	62244724	6.59964e+07	201541082	1.04154e+08	2.0251e+08	183897091	2.28178e+08	1.83033e+08	2.09328e+08	2.6971e+08	210669454	9.03134e+07	2.29348e+08	2.25007e+08	1.85993e+08	1.3016e+08	1.6998e+08	279489962	1.80325e+08	1.87159e+08	1.92251e+08	9.10318e+07	1.93458e+08	2.20631e+08	1.28781e+08	1.3417e+08	1231.53	1873.36	1427.29	1569.87	1012.93	1482.86	1455.31	1491.52	2111.07	1868.44	1740.02	1782.79	1854.94	1504.39	1441.01
P85108	Tubulin beta-2A chain OS=Rattus norvegicus GN=Tubb2a PE=1 SV=1 - [TBB2A_RAT]	49.875	1.59405e+08	6.13678e+08	2.4828e+08	5.72549e+08	2.35115e+08	1.03045e+09	1.98709e+08	2.6185e+08	1.04001e+09	7.70956e+08	8.05182e+08	5.11156e+08	1.23081e+09	9.45021e+08	7.45458e+08	9.77139e+08	1.71771e+09	1.08609e+09	1.84588e+09	1.79965e+09	2.22108e+09	1.81501e+09	1.56241e+09	1.82e+09	8.75497e+08	9.58144e+08	6.12241e+08	7.12135e+08	7.22537e+08	7.93958e+08	1.10491e+09	1.09513e+09	1222.15	3559.17	1830.53	2872.7	1270.54	5200.5	1382.86	2072.8	4326.14	4540.54	4360.21	3789.16	4990.81	4646.49	3493.59
P18421	Proteasome subunit beta type-1 OS=Rattus norvegicus GN=Psmb1 PE=1 SV=3 - [PSB1_RAT]	26.4623	9.39987e+07	2.48698e+08	2.04345e+08	3.05557e+08	3.01544e+08	2.77931e+08	1.60141e+08	9.58022e+07	2.54828e+08	2.47473e+08	2.8223e+08	2.96963e+08	3.06093e+08	2.52666e+08	3.19339e+08	3.62278e+08	2.62408e+08	241261076	3.10484e+08	2.91662e+08	3.04065e+08	2.84919e+08	319497837	3.49719e+08	3.60395e+08	3.54523e+08	4.05122e+08	391389844	4.31504e+08	425126697	4.61411e+08	4.50364e+08	1222.04	1895.63	1901.94	2335.36	2061.21	1583.56	1572.44	1227.77	1759.15	2109.77	1770.49	1946.9	1603.9	1875.55	1868.66
Q4KM65	Cleavage and polyadenylation specificity factor subunit 5 OS=Rattus norvegicus GN=Nudt21 PE=2 SV=1 - [CPSF5_RAT]	26.2237	1.41047e+08	1.68957e+08	1.61064e+08	1.94405e+08	2.13032e+08	2.32098e+08	1.98829e+08	2.16558e+08	266995721	1.98569e+08	2.77324e+08	2.97621e+08	2.94449e+08	2.50274e+08	3.14789e+08	4.2427e+08	2.8955e+08	1.95191e+08	3.10939e+08	3.80161e+08	4.56169e+08	2.64698e+08	4.23883e+08	4.61885e+08	2.70399e+08	3.14892e+08	2.82825e+08	3.20471e+08	4.01651e+08	3.26043e+08	3.57577e+08	3.09183e+08	1217.43	1025.62	1232.27	1279.78	1349	1161.11	1263.73	1380.08	1260.91	1137.16	1777.87	1436.05	1312.54	1446.73	1441.31
P13941	Collagen alpha-1(III) chain OS=Rattus norvegicus GN=Col3a1 PE=2 SV=3 - [CO3A1_RAT]	138.851	1.28482e+08	1.42587e+08	165915586	1.56182e+08	1.65879e+08	1.77556e+08	2.04522e+08	1.64844e+08	1.55992e+08	1.36665e+08	1.70189e+08	1.73602e+08	1.79528e+08	1.83128e+08	1.96337e+08	2.03825e+08	1.75118e+08	138988064	181219040	1.72116e+08	1.96041e+08	1.63479e+08	2.01353e+08	2.23938e+08	1.32686e+08	1.33028e+08	160435082	1.45831e+08	2.24154e+08	1.70903e+08	1.84104e+08	1.40311e+08	1209.18	641.465	896.815	873.099	909.635	283.496	1192.96	1097.91	582.643	867.746	743.857	898.545	797.025	722.025	919.053
Q64268	Heparin cofactor 2 OS=Rattus norvegicus OX=10116 GN=Serpind1 PE=1 SV=1 - [HEP2_RAT]	54.5169	7.88165e+07	9.45918e+07	1.11522e+08	1.20321e+08	1.04851e+08	1.25362e+08	1.17237e+08	9.75151e+07	1.96211e+08	1.8426e+08	2.25342e+08	2.23639e+08	2.1728e+08	2.00645e+08	2.12208e+08	2.5018e+08	2.14589e+08	1.92771e+08	2.40924e+08	2.15185e+08	2.49227e+08	2.06403e+08	2.4868e+08	2.6982e+08	2.09594e+08	2.51202e+08	2.22443e+08	2.2053e+08	2.86513e+08	2.52513e+08	286527986	2.70285e+08	1207.53	699.699	970.546	756.654	795.721	697.518	923.705	1104.84	1623.96	1307.16	1443.53	1332.32	1397.72	1518.57	1437.31
Q6P4Z9	COP9 signalosome complex subunit 8 OS=Rattus norvegicus GN=Cops8 PE=2 SV=1 - [CSN8_RAT]	23.221	9.39635e+07	1.106e+08	1.10982e+08	1.36916e+08	7.84975e+07	1.21534e+08	1.17924e+08	1.08174e+08	1.02637e+08	9.68973e+07	1.03513e+08	9.54358e+07	1.2542e+08	1.38163e+08	1.48515e+08	1.58896e+08	1.78143e+08	1.33209e+08	2.1747e+08	1.81725e+08	2.06022e+08	1.82242e+08	2.26746e+08	2.01346e+08	1.85957e+08	2.13534e+08	2.20586e+08	1.54197e+08	2.38645e+08	1.90399e+08	2.35701e+08	1.95502e+08	1205.13	672.196	1249.56	665.632	408.364	786.921	987.872	976.107	540.47	607.407	735.642	798.574	447.4	681.152	564.198
Q63228	Glia maturation factor beta OS=Rattus norvegicus GN=Gmfb PE=1 SV=2 - [GMFB_RAT]	16.7255	5.88217e+08	3.88547e+08	5.1954e+08	5.53929e+08	5.03726e+08	3.82692e+08	2.59953e+08	4.0795e+08	5.71348e+08	4.40361e+08	4.8565e+08	5.8716e+08	4.86138e+08	4.16688e+08	4.56754e+08	610318503	6.11255e+08	4.92594e+08	5.42714e+08	5.50082e+08	3.33636e+08	4.27788e+08	5.63963e+08	4.62862e+08	524739467	5.61607e+08	606872957	4.86655e+08	5.31774e+08	5.39524e+08	4.5292e+08	4.5704e+08	1202.65	839.517	911.829	785.782	939.933	916.322	962.644	1173.69	840.511	872.953	820.004	985.705	635.131	918.93	1061.6
P04041	Glutathione peroxidase 1 OS=Rattus norvegicus GN=Gpx1 PE=1 SV=4 - [GPX1_RAT]	22.2923	5.41434e+08	5.15e+08	6.0339e+08	6.4576e+08	6.37534e+08	5.6393e+08	6.1573e+08	5.98801e+08	7.40342e+08	6.54409e+08	8.30157e+08	8.43085e+08	7.53245e+08	7.03139e+08	9.10869e+08	1.05597e+09	7.66755e+08	7.27533e+08	7.87999e+08	8.65594e+08	893614555	8.15876e+08	9.73337e+08	9.71627e+08	7.87115e+08	8.37747e+08	8.61895e+08	8.79718e+08	9.73685e+08	8.97882e+08	1.02113e+09	9.51796e+08	1200.1	1071.96	1392.53	1206.16	1180.66	1055.69	1527.22	1545.32	1319.59	1091.01	1261.49	1196.28	1239.09	1187.99	1342.9
A0JPJ7	Obg-like ATPase 1 OS=Rattus norvegicus GN=Ola1 PE=2 SV=1 - [OLA1_RAT]	44.5072	9.57077e+07	1.35423e+08	1.22217e+08	1.76686e+08	1.5286e+08	1.83469e+08	1.48577e+08	1.29164e+08	2.22846e+08	1.89311e+08	532694786	2.38282e+08	2.33266e+08	2.23996e+08	2.64301e+08	3.32751e+08	2.88067e+08	2.18736e+08	3.19765e+08	2.77013e+08	340795510	2.86693e+08	3.60155e+08	3.73967e+08	2.6085e+08	2.72103e+08	2.43983e+08	2.47225e+08	3.08969e+08	2.82417e+08	3.38414e+08	395625972	1199.3	1167.4	1700.23	1300.67	1389.05	1413.64	1809.68	1799.37	1634.5	1566.99	1517.89	1591.98	1722.95	1645.59	1846.93
Q6RUV5	Ras-related C3 botulinum toxin substrate 1 OS=Rattus norvegicus GN=Rac1 PE=1 SV=1 - [RAC1_RAT]	21.4362	5.56644e+08	7.59694e+08	7.61305e+08	8.89955e+08	7.81495e+08	8.10417e+08	8.55928e+08	8.75948e+08	9.02685e+08	7.63728e+08	1.0324e+09	1.00313e+09	1.12524e+09	9.59199e+08	1.20696e+09	1.32339e+09	1.2011e+09	8.73481e+08	1.30761e+09	1.28526e+09	1.42102e+09	1.39261e+09	1.53374e+09	1.77813e+09	9.42861e+08	1.05239e+09	1.1029e+09	1.12812e+09	1.10217e+09	1308916039	1.47269e+09	1.37036e+09	1194.01	1495.88	1673.92	1488.44	1894.05	1105.21	1508.43	1681.29	1529.84	1371.25	1780.89	1603.7	1482.01	1592.09	1566.65
P35434	ATP synthase subunit delta, mitochondrial OS=Rattus norvegicus GN=Atp5d PE=1 SV=2 - [ATPD_RAT]	17.5842	3.91167e+08	3.28522e+08	5.35071e+08	4.65502e+08	4.05509e+08	3.95585e+08	5.34294e+08	4.75352e+08	7.33559e+08	6.35779e+08	9.25661e+08	8.29265e+08	7.08696e+08	7.11528e+08	9.48203e+08	9.89262e+08	7.91784e+08	7.2571e+08	9.74066e+08	8.29511e+08	7.67374e+08	8.45303e+08	1.00972e+09	1.13813e+09	5.22289e+08	4.84788e+08	7.54727e+08	7.49964e+08	6.62439e+08	7.7384e+08	7.99976e+08	7.1498e+08	1192.9	1245.87	1372.76	1179.48	1309.02	1171.39	1305.79	1139.83	1839.88	1784.1	2584.19	1886.15	2150	2313.71	1581.4
P13676	Acylamino-acid-releasing enzyme OS=Rattus norvegicus GN=Apeh PE=1 SV=1 - [ACPH_RAT]	81.3314	1.71825e+08	9.05587e+07	1.58612e+08	1.71301e+08	1.76265e+08	1.6933e+08	1.64554e+08	1.61444e+08	9.28689e+07	109152140	92413126	1.05766e+08	1.08919e+08	9.97792e+07	1.77629e+08	1.52217e+08	1.04611e+08	1.00687e+08	1.30832e+08	127215394	1.51687e+08	1.20268e+08	175628071	1.75685e+08	1.08153e+08	1.24802e+08	1.66542e+08	1.4989e+08	1.64977e+08	1.82929e+08	2.03335e+08	1.99845e+08	1185.55	683.627	1013.9	1167.74	1827.69	1325.76	1611.81	2061	555.029	846.831	538.882	814.663	920.754	976.018	762.158
Q68FR8	Tubulin alpha-3 chain OS=Rattus norvegicus GN=Tuba3a PE=2 SV=1 - [TBA3_RAT]	49.9276	1.50737e+08	6.6223e+08	2.85726e+08	6.1236e+08	1.6213e+08	1009356536	1.83817e+08	2.17266e+08	8.43829e+08	7.10043e+08	6.85994e+08	6.41841e+08	1.01052e+09	7.59717e+08	6.37332e+08	9.27493e+08	1.32337e+09	1.11979e+09	1.95663e+09	1.89523e+09	2.14139e+09	1.79023e+09	1.59523e+09	2.12601e+09	8.24643e+08	895782388	5.97082e+08	6.82389e+08	6.2254e+08	7.18288e+08	1.08651e+09	1.10949e+09	1183.67	3695.39	1982.48	2722.58	1549.88	3874.32	1210.87	1040.95	3722.75	3809.35	3379.84	3334.13	4192.41	3644.69	2642.76
Q99PS8	Histidine-rich glycoprotein OS=Rattus norvegicus OX=10116 GN=Hrg PE=1 SV=1 - [HRG_RAT]	59.0117	1.6907e+08	164112325	2.04165e+08	2.03905e+08	107795447	1.04074e+08	2.27736e+08	2.1161e+08	4.05818e+08	391844451	413522539	4.30093e+08	4.55394e+08	4.23045e+08	5.2424e+08	559038487	5.51257e+08	5.47528e+08	5.91652e+08	5.72371e+08	5.03433e+08	4.52517e+08	619067929	6.10806e+08	4.23175e+08	4.66448e+08	4.0678e+08	5.02966e+08	5.58795e+08	5.56169e+08	5.21335e+08	4.8913e+08	1182.61	801.207	1209.45	907.679	950.035	781.754	1385.98	1367.45	2156.98	2133.5	2192.43	1954.43	1896.23	1684.68	2085.28
G3V9R8	Heterogeneous nuclear ribonucleoprotein C OS=Rattus norvegicus GN=Hnrnpc PE=1 SV=2 - [HNRPC_RAT]	32.8371	1.67341e+08	3.01757e+08	2.0409e+08	3.02258e+08	2.24467e+08	391007822	1.37422e+08	164106526	415394068	3.12101e+08	3.02604e+08	3.0313e+08	4.13792e+08	2.99209e+08	2.98062e+08	4.2557e+08	4.53536e+08	4.21763e+08	4.55659e+08	4.96112e+08	4.76047e+08	4.15784e+08	4.40283e+08	5.55739e+08	4.37756e+08	391443552	2.76046e+08	3.14964e+08	3.12078e+08	3.03828e+08	4.17113e+08	5.25506e+08	1181.23	1245.03	989.09	989.061	796.26	1378.15	846.712	1111.95	1356.18	1006.96	953.985	916.997	1330.39	1026.97	1108.29
O08629	Transcription intermediary factor 1-beta OS=Rattus norvegicus GN=Trim28 PE=1 SV=2 - [TIF1B_RAT]	88.8995	7.93226e+07	1.22325e+08	74735678	8.94358e+08	5.71143e+07	1.64974e+08	6.2593e+07	6.7386e+07	1.43996e+08	1.34688e+08	1.43818e+08	1.43709e+08	1.6904e+08	169370350	1.43385e+08	1.90603e+08	2.4902e+08	2.00463e+08	298933004	3.03736e+08	1.12096e+09	3.05249e+08	3.51767e+08	3.66769e+08	109865184	1.21554e+08	1.01692e+08	111723443	1.07447e+08	1.24746e+08	1.59659e+08	1.53247e+08	1180.54	1531.19	1356.85	1802.82	567.835	1581.13	1139.34	1193.85	2374.49	1534.31	1567.17	1448.35	2053.76	1738.37	1183.28
Q02589	[Protein ADP-ribosylarginine] hydrolase OS=Rattus norvegicus GN=Adprh PE=1 SV=2 - [ADPRH_RAT]	39.9354	1.65349e+08	1.39657e+08	1.60625e+08	1.9337e+08	1.73593e+08	1.95573e+08	1.98318e+08	1.66063e+08	1.50055e+08	1.15542e+08	1.67204e+08	1.35761e+08	1.57129e+08	1.3707e+08	2.21169e+08	2.05872e+08	1.68734e+08	1.29789e+08	1.95909e+08	1.76041e+08	1.96993e+08	1.50819e+08	234522275	2.1657e+08	1.30117e+08	1.53394e+08	1.46795e+08	1.48708e+08	2.02047e+08	1.67082e+08	2.00186e+08	1.63286e+08	1174.67	1047.71	1755.43	1433.87	1406.32	1093.78	1565.95	1568.38	844.842	746.892	955.319	887.477	707.312	867.726	935.132
P09527	Ras-related protein Rab-7a OS=Rattus norvegicus GN=Rab7a PE=1 SV=2 - [RAB7A_RAT]	23.4889	147505918	303481333	221015213	3.24087e+08	1.95738e+08	3.97302e+08	1.90075e+08	2.19908e+08	4.60485e+08	4.47611e+08	4.52262e+08	4.57132e+08	5.6851e+08	5.05431e+08	4.77883e+08	6.6482e+08	5.76941e+08	4.51803e+08	6.84133e+08	669798081	7.12184e+08	6.79511e+08	7.09899e+08	8.43946e+08	5.2842e+08	6.64404e+08	5.6297e+08	6.03411e+08	5.48544e+08	6.31344e+08	8.13691e+08	8.38832e+08	1167.05	1421.23	1338.38	1450.37	900.592	1337.68	1253.61	1216.45	2288.23	2345.66	1808.4	1750.37	1894.19	1894.62	1616.3
Q6AY63	ADP-sugar pyrophosphatase OS=Rattus norvegicus GN=Nudt5 PE=2 SV=1 - [NUDT5_RAT]	24.1022	2.78851e+08	2.48892e+08	3.48932e+08	3.62831e+08	3.67965e+08	2.92739e+08	3.3792e+08	3.22501e+08	2.89911e+08	278707019	2.85453e+08	3.55548e+08	3.27198e+08	3.22669e+08	3.60429e+08	4.35196e+08	3.21222e+08	317165439	3.39356e+08	350531757	3.69179e+08	3.57463e+08	4.45487e+08	4.22169e+08	2.95785e+08	3.02831e+08	3.53624e+08	3.45999e+08	372741315	4.20498e+08	4.26555e+08	3.94891e+08	1163.59	708.952	1130.67	1012.47	898.733	744.869	953.174	1052.63	755.59	796.186	535.398	703.373	564.824	686.075	631.177
Q9Z2G8	Nucleosome assembly protein 1-like 1 OS=Rattus norvegicus GN=Nap1l1 PE=2 SV=1 - [NP1L1_RAT]	45.2849	3.43093e+08	340141942	453217617	5.19621e+08	4.19552e+08	4.74321e+08	4.49793e+08	4.43012e+08	4.41876e+08	3.69443e+08	4.57126e+08	4.66753e+08	4.93017e+08	4.5082e+08	5.44779e+08	5.93016e+08	628855998	5.26948e+08	6.52337e+08	6.49578e+08	7.03956e+08	6.20606e+08	7.70485e+08	7.84933e+08	5.121e+08	5.81077e+08	5.29463e+08	5.77558e+08	6.24385e+08	6.43803e+08	6.91896e+08	7.10382e+08	1162.29	603.896	783.995	631.798	618.868	591.483	946.675	670.983	762.711	706.672	705.541	716.171	632.896	676.151	653.374
Q9Z1A5	NEDD8-activating enzyme E1 regulatory subunit OS=Rattus norvegicus GN=Nae1 PE=1 SV=1 - [ULA1_RAT]	60.3446	8.64587e+07	7.76787e+07	8.83147e+07	1.42742e+08	1.07082e+08	117556558	9.85756e+07	9.78862e+07	7.86846e+07	7.21949e+07	8.52673e+07	8.58523e+07	8.56281e+07	7.80876e+07	1.10473e+08	1.16766e+08	1.06248e+08	7.42446e+07	1.1283e+08	9.10769e+07	1.07746e+08	8.95545e+07	1.27456e+08	1.1281e+08	8.98642e+07	102517542	1.04386e+08	9.73649e+07	1.13509e+08	1.15584e+08	1.20392e+08	103884547	1159.9	734.794	949.718	1009.35	1160.35	1056.09	1135.36	1715.07	650.561	769.119	784.958	711.966	619.954	695.732	722.368
Q8VBU2	Protein NDRG2 OS=Rattus norvegicus GN=Ndrg2 PE=1 SV=1 - [NDRG2_RAT]	40.7531	1.74477e+08	2.03652e+08	1.97008e+08	2.68165e+08	2.68944e+08	3.17927e+08	2.42272e+08	2.07304e+08	2.30086e+08	2.00096e+08	2.557e+08	2.35292e+08	2.48119e+08	2.08187e+08	3.47632e+08	3.60986e+08	2.77335e+08	2.01526e+08	3.1364e+08	3.07949e+08	3.34297e+08	2.82654e+08	3.93601e+08	3.3069e+08	2.32162e+08	2.64867e+08	2.52503e+08	2.61717e+08	3.44909e+08	2.80822e+08	3.55931e+08	3.29494e+08	1159.39	1255.34	1623.79	1407.4	1670.2	1373.82	2131.82	2188.71	1223.48	1141.46	1336.6	985.725	939.537	983.421	1234.27
Q8CG45	Aflatoxin B1 aldehyde reductase member 2 OS=Rattus norvegicus GN=Akr7a2 PE=1 SV=2 - [ARK72_RAT]	40.6493	2.15994e+08	1.58863e+08	2.60781e+08	2.11345e+08	2.56762e+08	2.30413e+08	2.40776e+08	2.53787e+08	2.2099e+08	2.31117e+08	2.26218e+08	2.34035e+08	3.02559e+08	290024267	3.42997e+08	3.86584e+08	2.67627e+08	2.54591e+08	3.73948e+08	3.77164e+08	3.65654e+08	3.3068e+08	4.19079e+08	4.07085e+08	2.57112e+08	317297572	3.28574e+08	322943296	3.60436e+08	3.43773e+08	4.05092e+08	3.68019e+08	1157.7	1096.23	1535.53	1246.11	1416.15	819.79	1697.85	1594.01	937.461	1093.18	1232.58	1101.69	1173.62	983.863	1137.35
B0BN85	Suppressor of G2 allele of SKP1 homolog OS=Rattus norvegicus GN=Sugt1 PE=2 SV=1 - [SUGT1_RAT]	38.0669	1.02692e+08	1.10451e+08	1.46543e+08	1.20981e+08	1.14537e+08	1.03955e+08	1.23307e+08	1.18629e+08	1.15618e+08	1.44936e+08	1.4258e+08	1.39321e+08	1.35231e+08	1.31107e+08	2.00695e+08	1.83827e+08	1.76518e+08	1.36033e+08	1.79957e+08	174508874	1.82675e+08	1.45782e+08	2.12822e+08	1.99103e+08	121134753	1.83921e+08	1.56197e+08	1.60044e+08	1.83605e+08	2.46284e+08	1.86997e+08	1.62899e+08	1153.39	842.543	1617.82	1028.46	892.611	680.514	1322.91	1498.46	956.005	1173.71	860.267	1393.45	1015.46	993.609	1223.14
P61203	COP9 signalosome complex subunit 2 OS=Rattus norvegicus GN=Cops2 PE=2 SV=1 - [CSN2_RAT]	51.5641	5.87817e+08	7.04472e+07	8.13238e+08	1.03356e+08	5.98856e+07	1.00535e+08	8.65052e+07	8.77144e+07	6.9506e+07	6.07057e+07	7.89007e+07	8.59278e+07	3.80985e+08	7.79949e+07	7.90392e+08	9.72954e+07	9.21431e+07	7.68212e+07	1.12234e+08	1.15509e+08	4.27253e+08	410252447	588429621	1.23522e+08	9.03874e+07	2.68847e+08	9.88015e+07	9.8727e+07	1.27035e+08	6.10172e+08	6.30158e+08	1.20072e+08	1151.13	958.152	1103.25	1097.17	929.121	970.062	1546.7	1547.31	822.634	680.564	643.829	970.959	930.269	815.759	1024.68
Q63028	Alpha-adducin OS=Rattus norvegicus GN=Add1 PE=2 SV=2 - [ADDA_RAT]	80.3053	2.4018e+08	1.02273e+08	1.6232e+08	1.61005e+08	1.40755e+08	1.14684e+08	1.73378e+08	1.21568e+08	1.12061e+08	7.3869e+07	7.55572e+07	9.91694e+07	1.02976e+08	7.00201e+07	9.2183e+07	9.77701e+07	1.17833e+08	127689844	1.0638e+08	1.2684e+08	1.32407e+08	1.38746e+08	1.0242e+08	1.28009e+08	1.05759e+08	9.07648e+07	8.32292e+07	9.19094e+07	8.60378e+07	9.81736e+07	122618131	102702429	1147.12	974.933	1368.94	1250.92	571.574	624.719	1228.46	1261.71	604.553	882.027	765.311	563.004	600.157	492.263	600.261
B4F777	High mobility group nucleosome-binding domain-containing protein 5 OS=Rattus norvegicus OX=10116 GN=Hmgn5 PE=2 SV=1 - [HMGN5_RAT]	48.5761	1.79095e+08	1.09519e+08	1.83496e+08	1.36599e+08	9.62069e+07	8.35902e+07	1.86457e+08	1.17834e+08	71226154	7.08754e+07	6.88378e+07	6.23149e+07	4.51515e+07	6.06476e+07	8.81102e+07	6.87405e+07	1.03055e+08	9.04579e+07	4.06809e+07	1.44395e+07	6.44395e+07	7.7433e+07	8.9919e+07	6.63427e+07	5.9835e+07	5.48086e+07	5.67255e+07	5.89412e+07	7.04629e+07	1.60263e+08	3.59647e+07	50879240	1141.17	435.834	849.262	801.013	666.209	495.138	1031.69	862.363	220.514	242.48	261.056	276.061	293.688	367.239	730.051
Q62930	Complement component C9 OS=Rattus norvegicus OX=10116 GN=C9 PE=1 SV=1 - [CO9_RAT]	62.2406	73600369	9.16898e+07	8.68823e+07	1.08988e+08	9.80095e+07	1.23403e+08	9.50654e+07	9.19205e+07	2.04977e+08	1.89385e+08	2.23966e+08	2.27113e+08	2.3196e+08	1.98132e+08	2.8719e+08	3.36922e+08	2.89341e+08	2.31803e+08	3.22921e+08	2.86594e+08	3.29732e+08	2.76192e+08	3.65636e+08	3.59495e+08	231432372	2.79114e+08	2.51751e+08	2.55853e+08	3.15231e+08	3.03365e+08	3.19216e+08	2.9098e+08	1140.8	929.613	1392.29	1900.02	1298.78	1306.1	1577.67	1771.35	2600.43	2571.56	2875.45	3220.86	2560.99	2701.02	3060.94
P30713	Glutathione S-transferase theta-2 OS=Rattus norvegicus GN=Gstt2 PE=1 SV=3 - [GSTT2_RAT]	27.4215	1.14228e+08	1.09957e+08	1.38413e+08	2.41038e+08	1.33212e+08	1.42602e+08	1.82946e+08	175860598	1.76845e+08	1.46582e+08	1.63801e+08	1.67181e+08	1.81991e+08	1.68379e+08	2.15203e+08	2.28103e+08	199322124	174723739	1.89937e+08	2.25442e+08	2.2755e+08	1.91551e+08	2.75259e+08	2.33217e+08	2.05886e+08	2.08449e+08	2.28285e+08	2.2991e+08	2.65796e+08	2.25623e+08	2.81692e+08	2.17969e+08	1135.8	538.512	812.719	959.389	690.59	797.365	1192.38	1238	983.862	745.104	989.912	1168.92	810.294	852.327	783.791
P49432	Pyruvate dehydrogenase E1 component subunit beta, mitochondrial OS=Rattus norvegicus GN=Pdhb PE=1 SV=2 - [ODPB_RAT]	38.957	3.55651e+08	1.20058e+08	461587363	4.83088e+08	4.80314e+08	4.29261e+08	4.75885e+08	159365813	437478933	3.4994e+08	4.76595e+08	4.87557e+08	5.19387e+08	1.85367e+08	5.71514e+08	6.51919e+08	5.87034e+08	4.15864e+08	5.28687e+08	2.29876e+08	6.34225e+08	2.1201e+08	2.58746e+08	2.53617e+08	5.43741e+08	2.3588e+08	2.18113e+08	5.83866e+08	7.03503e+08	6.11131e+08	7.49443e+08	6.67076e+08	1123.16	1439.97	1455.83	1354.86	1183.23	1171.69	1259.91	1835.6	1663.88	1679.51	1843.37	1869.2	1543.31	1551.52	1772.23
P21775	3-ketoacyl-CoA thiolase A, peroxisomal OS=Rattus norvegicus GN=Acaa1a PE=1 SV=2 - [THIKA_RAT]	43.8057	7.86319e+07	87647447	1.0061e+08	1.13223e+08	112182572	1.14419e+08	1.02365e+08	1.03483e+08	1.34867e+08	1.20341e+08	1.49038e+08	1.56004e+08	166080770	1.43804e+08	1.72502e+08	1.89026e+08	1.72573e+08	1.4724e+08	1.52277e+08	1.68784e+08	1.87016e+08	1.66167e+08	4.83593e+08	222713267	1.36635e+08	1.38445e+08	1.39726e+08	1.43167e+08	1.62904e+08	1.6951e+08	1.33575e+08	176872404	1121.33	991.995	1275.9	1344.76	813.762	1106.96	881.96	1665.85	1701.02	1800.57	1935.67	2043.06	1541.99	1400.27	1393.74
P63159	High mobility group protein B1 OS=Rattus norvegicus GN=Hmgb1 PE=1 SV=2 - [HMGB1_RAT]	24.8782	2.22412e+08	4.27533e+08	2.36667e+08	4.12564e+08	3.46743e+08	3.76556e+08	274563127	2.54322e+08	736294873	5.3681e+08	473154824	5.54865e+08	880728720	7.42984e+08	5.53124e+08	9.76741e+08	6.6393e+08	444251245	9.37842e+08	1.06157e+09	1.18794e+09	1.0246e+09	758283446	1.08e+09	6.97463e+08	7.21569e+08	8.30951e+08	6.32624e+08	5.68304e+08	7.78728e+08	9.90491e+08	9.3272e+08	1116.79	2289.83	1337.72	2056.17	1950.75	1943.72	1488.81	1071.89	1993.87	2178.52	2077.56	2349.37	2508.48	3029.6	2074.94
Q00715	Histone H2B type 1 OS=Rattus norvegicus PE=1 SV=2 - [H2B1_RAT]	13.9816	3.23197e+08	9.2031e+08	3.69427e+08	7.64811e+08	3.17053e+08	1282398626	2.81126e+08	3.32237e+08	1.92754e+09	1.42139e+09	1.53819e+09	1.45978e+09	2.30336e+09	1.57227e+09	1.2333e+09	1.72123e+09	2.26189e+09	1662413893	3.69647e+09	3.82171e+09	4040713947	2.8704e+09	2.59488e+09	3.01815e+09	1.42674e+09	1.50903e+09	9.98908e+08	1220963031	9.30073e+08	1.13345e+09	2.25327e+09	2.78425e+09	1116.76	1513.21	927.284	941.329	753.373	1519.42	761.116	797.366	1904.7	1521.41	1271.02	1273.17	1974.29	1666.45	946.189
O54735	cGMP-specific 3',5'-cyclic phosphodiesterase OS=Rattus norvegicus OX=10116 GN=Pde5a PE=2 SV=1 - [PDE5A_RAT]	94.4955	3.33028e+07	6.72677e+07	5.09795e+07	7.98475e+07	38458714	1.18393e+08	5.76555e+07	4.27714e+08	3.47213e+07	3.02299e+07	3.86321e+07	3.18333e+07	4.38177e+07	5.25066e+07	4.32811e+07	4.21882e+07	3.06335e+07	2.6274e+07	3.9109e+07	3.28126e+07	8.96138e+07	1.98119e+07	5.86731e+07	5.76106e+07	3.53135e+07	5.64785e+07	5.15982e+07	3.74344e+07	6.20835e+07	9.84582e+07	4.99667e+07	1.14101e+08	1112.92	1440.75	1125.87	1547.44	959.595	1882.53	1423.05	1290.22	768.645	792.121	890.395	891.723	1137.88	1033.56	910.938
F1LNI5	Protein phosphatase 1G OS=Rattus norvegicus GN=Ppm1g PE=1 SV=2 - [PPM1G_RAT]	58.7065	2.21298e+08	8.0784e+07	9.69709e+07	1.09811e+08	2.48094e+08	2.29407e+08	2.74247e+08	2.81698e+08	1.22437e+08	1.07857e+08	1.16431e+08	1.15169e+08	121560424	9.18183e+07	1.23018e+08	1.63007e+08	1.63209e+08	1.31012e+08	1.48222e+08	1.37421e+08	1.79858e+08	1.35464e+08	1.87665e+08	5.31509e+08	1.04639e+08	1.28463e+08	3.89922e+08	1.08704e+08	1.26362e+08	120610399	4.31529e+08	1.29671e+08	1109.6	387.018	736.659	772.995	1181.85	520.009	933.019	1086.75	663.33	600.628	791.268	937.189	602.967	761.31	581.436
G3V928	Prolow-density lipoprotein receptor-related protein 1 OS=Rattus norvegicus OX=10116 GN=Lrp1 PE=1 SV=1 - [LRP1_RAT]	504.558	9.78334e+07	3.06861e+08	2.50573e+08	1.67926e+08	9.22465e+07	2.39793e+08	1.51003e+08	2.13715e+08	4.31595e+08	3.19395e+08	197326742	2.1108e+08	2.44159e+08	1.76058e+08	3.04632e+08	2.23159e+08	2.79468e+08	250802892	2.63373e+08	2.7208e+08	3.9294e+08	4.42832e+08	3.16609e+08	4.19102e+08	1.85984e+08	1.80518e+08	2.78042e+08	1.89864e+08	2.32655e+08	2.64541e+08	4.98321e+08	5.34363e+08	1107.38	1883.13	1476.85	1906.5	1513.43	2204.23	1849.24	1761.57	1533.06	1351.07	1323.15	1503.18	1611.42	1429.24	1303.2
P15999	ATP synthase subunit alpha, mitochondrial OS=Rattus norvegicus GN=Atp5a1 PE=1 SV=2 - [ATPA_RAT]	59.7166	226093322	4.33971e+08	3.14953e+08	4.67734e+08	2.70091e+08	6.00258e+08	3.14782e+08	2.95554e+08	584535490	5.33538e+08	6.39856e+08	6.02618e+08	7.78249e+08	6.78415e+08	6.72175e+08	823212802	9.25657e+08	6.98637e+08	988223670	1.09692e+09	1.14052e+09	9.68177e+08	1.12274e+09	1.18117e+09	7.40877e+08	8.377e+08	6.84096e+08	6.9474e+08	7.6489e+08	8.06045e+08	1.06474e+09	9.87368e+08	1102.89	3197.82	1055.5	2601.63	668.887	3650.75	799.695	1468.5	4283.42	4101.78	3738.86	3557.16	4089.04	3955.6	2492.23
D4A1R8	Copine-1 OS=Rattus norvegicus GN=Cpne1 PE=1 SV=1 - [CPNE1_RAT]	58.8064	8.8428e+07	8.78622e+07	1.10451e+08	1.1381e+08	9.71354e+07	8.23213e+07	131497561	1.15831e+08	1.08523e+08	104721120	1.3017e+08	104088353	61991350	1.09655e+08	1.47405e+08	1.48819e+08	1.4895e+08	140781166	143237844	1.46834e+08	1.04687e+08	9.04562e+07	1.2314e+08	1.80943e+08	1.38287e+08	141669130	1.56457e+08	1.60545e+08	1.77255e+08	1.15529e+08	1.60542e+08	1.08688e+08	1100.43	760.589	1208.17	1003.25	910.965	442.461	1369.82	1184.73	858.816	1077.28	1002.2	1049.16	688.943	878.594	1006.59
Q5I0G4	Glycine--tRNA ligase OS=Rattus norvegicus OX=10116 GN=Gars1 PE=1 SV=2 - [GARS_RAT]	81.7407	7.79779e+07	9.19389e+07	1.03641e+08	151281693	1.0542e+08	1.41609e+08	1.184e+08	1.20394e+08	2.2525e+08	1.77331e+08	2.02534e+08	2.5069e+08	2.60405e+08	2.23744e+08	2.74655e+08	2.91055e+08	2.58251e+08	1.64833e+08	3.00961e+08	3.03781e+08	2.94941e+08	2.73966e+08	3.22223e+08	358471799	2.86604e+08	2.8685e+08	3.14527e+08	2.74551e+08	2.72623e+08	3.09238e+08	4.1383e+08	3.59106e+08	1094.76	699.393	1266.27	1313.4	1054.74	804.034	1268.84	1640.93	1918.24	1900.78	2054.13	1750.15	1817.52	1980.12	1796.51
Q5XHZ0	Heat shock protein 75 kDa, mitochondrial OS=Rattus norvegicus GN=Trap1 PE=1 SV=1 - [TRAP1_RAT]	80.4108	1.11762e+09	1.54726e+09	1.50579e+09	2.62231e+09	1.32702e+09	1.74455e+09	1.34783e+09	9.6374e+08	2.59825e+09	1.84664e+09	2.49696e+09	2.13937e+09	1.89217e+09	1.80896e+09	1.9097e+09	2451877205	1.83752e+09	1.77435e+09	1.90553e+09	2.12802e+09	2.20697e+09	1.8867e+09	2.30421e+09	2.56696e+09	1.95965e+09	2270496281	2.07997e+09	2.06278e+09	2.26301e+09	2.44135e+09	2.76057e+09	2.36719e+09	1087.32	770.967	911.369	496.312	598.644	753.219	863.644	725.867	748.95	1054.08	715.302	752.036	906.804	731.783	778.982
P62986	Ubiquitin-60S ribosomal protein L40 OS=Rattus norvegicus GN=Uba52 PE=1 SV=2 - [RL40_RAT]	14.719	7.31188e+08	8.35628e+08	4.14336e+08	9.27865e+08	6.03149e+08	9.11271e+08	7.04796e+08	3.55514e+08	9.11081e+08	7.49347e+08	9.97077e+08	7.41372e+08	1.05419e+09	1.07072e+09	9.48028e+08	9.32196e+08	7.54414e+08	9.72814e+08	9.06316e+08	6.92956e+08	1504063272	1.08153e+09	1.11947e+09	1.5666e+09	1.06333e+09	1.22086e+09	9.86826e+08	7.63406e+08	1.39654e+09	1.17913e+09	1.39173e+09	1.32069e+09	1083.65	976.634	985.031	966.505	924.645	916.042	896.776	692.107	809.71	840.32	706.392	792.732	788.507	855.144	706.819
Q566E5	KDEL motif-containing protein 2 OS=Rattus norvegicus GN=Kdelc2 PE=2 SV=1 - [KDEL2_RAT]	58.6643	1.09593e+08	1.25275e+08	1.56225e+08	1.8633e+08	9.01181e+07	1.34852e+08	138353805	1.48654e+08	1.50322e+08	1.51539e+08	1.88824e+08	1.83261e+08	1.9382e+08	1.90703e+08	2.04837e+08	2.4186e+08	2.20697e+08	1.67778e+08	2.37063e+08	2.28689e+08	2.41463e+08	1.9797e+08	2.57386e+08	2.51145e+08	2.1819e+08	2.36024e+08	2.11928e+08	242365832	2.39355e+08	2.51491e+08	2.38965e+08	2.65703e+08	1082.16	1121.01	1095.68	1346.6	885.856	1019.08	1101.52	1195.29	1148	1365.55	1602.96	1605	1325.96	1365.96	1535.38
P31430	Dipeptidase 1 OS=Rattus norvegicus GN=Dpep1 PE=2 SV=2 - [DPEP1_RAT]	45.4931	8.16208e+07	2.58887e+08	1.29697e+08	2.69466e+08	102579527	3.52654e+08	1.02402e+08	8.66329e+07	3.98653e+08	3.03872e+08	3.61532e+08	3.75827e+08	4.80045e+08	3.76568e+08	4.45233e+08	5.50645e+08	5.59376e+08	3.07223e+08	6.36426e+08	6.24726e+08	6.60661e+08	5.85966e+08	696576208	741363312	3.81819e+08	4.61894e+08	4.00051e+08	3.88152e+08	4.01858e+08	3.99361e+08	5.53612e+08	5.49231e+08	1079.43	2312.83	1196.74	1583.22	710.984	2148.27	666.036	737.86	2125.31	1983.13	2218.93	2177.97	3078.44	2383.86	1771.32
Q5RJR2	Twinfilin-1 OS=Rattus norvegicus GN=Twf1 PE=2 SV=1 - [TWF1_RAT]	40.0655	9.7022e+07	1.10229e+08	1.22497e+08	1.33171e+08	1.23145e+08	1.19218e+08	1.23557e+08	1.3386e+08	1.04583e+08	1.0013e+08	1.06463e+08	130155509	1.1745e+08	1.27957e+08	138475436	1.71261e+08	1.34186e+08	1.10781e+08	1.27859e+08	1.3834e+08	156278236	1.30572e+08	1.46202e+08	166927082	1.30677e+08	1.39637e+08	1.35525e+08	149441407	152561553	1.4834e+08	182039089	1.63859e+08	1079.05	754.375	1334.17	879.729	845.724	794.688	1116.91	1543.97	678.926	643.016	586.097	652.321	666.354	1001.72	854.433
P04916	Retinol-binding protein 4 OS=Rattus norvegicus OX=10116 GN=Rbp4 PE=1 SV=1 - [RET4_RAT]	23.2053	1.28033e+08	9.4837e+07	1.48044e+08	1.2665e+08	1.41339e+08	1.27483e+08	1.2733e+08	1.60963e+08	2.4901e+08	2.39387e+08	2.37878e+08	2.48221e+08	2.44189e+08	2.65487e+08	3.38237e+08	3.8574e+08	2.82508e+08	2.72118e+08	3.02541e+08	321250921	2.93176e+08	3.00608e+08	3.69109e+08	3.35241e+08	266298746	3.53998e+08	3.34004e+08	3.43349e+08	3.48971e+08	3.49284e+08	3.99154e+08	3.39529e+08	1070.76	574.077	816.33	786.557	1048.22	374.706	950.76	983.177	1249.15	889.569	1206.43	1136.91	1008.05	1025.88	1274.56
Q68A21	Transcriptional activator protein Pur-beta OS=Rattus norvegicus GN=Purb PE=1 SV=3 - [PURB_RAT]	33.3976	2.29548e+08	279972445	2.8699e+08	3.30631e+08	3.00546e+08	3.3647e+08	2.90983e+08	2.60884e+08	2.8586e+08	2.33794e+08	2.51202e+08	2.84842e+08	2.97873e+08	2.74257e+08	3.67915e+08	4.03464e+08	332061331	2.68544e+08	3.80761e+08	3.84782e+08	3.83586e+08	3.4075e+08	4.29436e+08	4.59663e+08	2.78545e+08	328394071	3.54921e+08	3.58648e+08	388170718	3.51739e+08	4.27126e+08	372389654	1062.48	1238.78	1714.59	1494.64	1739.46	1701.88	1693.86	1951.61	1440.56	1656.6	1250.09	1487.77	1890.38	1678.21	2190.13
Q63279	Keratin, type I cytoskeletal 19 OS=Rattus norvegicus GN=Krt19 PE=1 SV=2 - [K1C19_RAT]	44.6086	3.74197e+08	1.68083e+08	1.84975e+08	287912483	2.16185e+08	1.66534e+08	132012236	2.54393e+09	3.36557e+08	2.8587e+08	3.19118e+08	3.89603e+08	3.96443e+08	3.45554e+08	4.38252e+08	4.73904e+08	498803638	3.2209e+08	477904755	5.25802e+08	649449130	4.88591e+08	7.04255e+08	5.9929e+08	3.22973e+08	3.555e+08	3.55738e+08	3.63134e+08	375505759	3.91884e+08	3.88469e+08	4.06132e+08	1053.88	837.361	917.278	1041.44	598.33	604.637	669.522	1266.13	2087.75	1629.93	1911.39	2163.67	2345.59	1782.65	2127.92
Q64620	Serine/threonine-protein phosphatase 6 catalytic subunit OS=Rattus norvegicus GN=Ppp6c PE=2 SV=2 - [PPP6_RAT]	35.1365	4.5488e+07	5.19737e+07	6.11372e+07	6.88504e+07	6.5078e+07	6.14686e+07	6.0835e+07	7.76629e+07	7.14699e+07	58743702	6.88898e+07	7.7262e+07	8.08934e+07	7.06867e+07	8.8409e+07	1.00838e+08	8.02725e+07	6.78349e+07	8.94518e+07	8.80866e+07	8.57536e+07	7.99459e+07	9.31104e+07	1.0106e+08	6.60005e+07	8.33948e+07	7.30525e+07	7.28541e+07	8.7851e+07	7.90167e+07	9.75543e+07	8.58154e+07	1049.7	363.593	710.461	511.759	515.364	283.573	715.625	737.935	458.736	585.606	640.269	493.529	632.673	481.303	504.97
P54311	Guanine nucleotide-binding protein G(I)/G(S)/G(T) subunit beta-1 OS=Rattus norvegicus GN=Gnb1 PE=1 SV=4 - [GBB1_RAT]	37.353	1.0041e+08	3.19412e+08	1.87968e+08	3.40083e+08	1.29255e+08	4.76398e+08	1.63173e+08	1.5091e+08	2.9207e+08	229099073	2.97841e+08	2.82115e+08	3.4131e+08	2.83768e+08	309807372	3.54888e+08	292173947	2.17506e+08	3.85696e+08	3.42227e+08	4.08059e+08	3.72692e+08	3.75484e+08	4.45234e+08	2.9873e+08	3.02239e+08	3.15714e+08	3.33592e+08	3.03553e+08	344639443	4.77241e+08	4.28218e+08	1047.13	2201.58	1394.72	2043.65	739.148	2135.01	1153.87	1362.86	1080.76	1283.99	1213.49	1160.96	1322.44	1217.01	913.497
P12369	cAMP-dependent protein kinase type II-beta regulatory subunit OS=Rattus norvegicus GN=Prkar2b PE=1 SV=3 - [KAP3_RAT]	46.0939	1.21481e+08	1.53008e+08	1.96903e+08	1.56034e+08	1.64306e+08	1.35874e+08	1.4104e+08	1.38592e+08	1.00669e+08	9.0543e+07	1.0614e+08	1.48975e+08	1.09524e+08	1.7871e+08	1.43618e+08	1.44578e+08	1.7446e+08	1.1743e+08	1.2617e+08	1.37107e+08	167517402	1.2361e+08	1.95494e+08	1.67936e+08	1.23372e+08	1.40062e+08	1.53388e+08	1.24178e+08	1.97304e+08	1.38437e+08	1.76878e+08	1.5583e+08	1043.43	954.291	1112.26	1006.25	867.307	1145.26	959.21	1209.3	478.478	705.873	533.358	637.138	457.891	654.066	590.638
P63086	Mitogen-activated protein kinase 1 OS=Rattus norvegicus GN=Mapk1 PE=1 SV=3 - [MK01_RAT]	41.2492	1.01084e+08	1.18238e+08	1.51749e+08	1.62967e+08	93509153	1.45799e+08	1.47955e+08	1.3851e+08	1.54254e+08	1.46809e+08	1.56212e+08	1.43709e+08	1.65053e+08	1.33971e+08	1.56523e+08	1.54061e+08	1.73206e+08	1.42771e+08	2.00594e+08	1.86717e+08	1.7156e+08	1.5623e+08	1.94903e+08	1.6831e+08	1.85385e+08	1.89006e+08	1.66634e+08	1.67182e+08	1.76372e+08	1.63205e+08	224268825	1.83261e+08	1042.92	1231.45	1323.31	1155.63	879.255	1201.1	1230.15	989.47	985.126	974.171	1189.19	1217.77	1178.98	1201.14	1030.3
P20650	Protein phosphatase 1A OS=Rattus norvegicus GN=Ppm1a PE=1 SV=1 - [PPM1A_RAT]	42.3897	9.63555e+07	1.05304e+08	132552282	1.44687e+08	201123591	1.3127e+08	1.48108e+08	1.34896e+08	1.50759e+08	1.91657e+08	1.55629e+08	1.22116e+08	1.24089e+08	1.01115e+08	1.52522e+08	1.63949e+08	178404386	1.59676e+08	1.45801e+08	1.30023e+08	1.47001e+08	1.38151e+08	1.80676e+08	1.80043e+08	103913848	1.13966e+08	1.41177e+08	2.38323e+08	1.86021e+08	1.32809e+08	1.65419e+08	1.3821e+08	1042.81	850.247	1153.62	1062.31	711.743	609.325	1069.64	1247.13	824.529	898.162	886.434	707.272	625.34	645.76	862.467
P52944	PDZ and LIM domain protein 1 OS=Rattus norvegicus GN=Pdlim1 PE=1 SV=4 - [PDLI1_RAT]	35.5618	3.26718e+08	2.6248e+08	2.70787e+08	4.07713e+08	3.61414e+08	2.70632e+08	3.54423e+08	3.1994e+08	3.37209e+08	3.45073e+08	3.27318e+08	3.53749e+08	3.7816e+08	4.10535e+08	1194417449	6.07229e+08	4.01e+08	3.89719e+08	4.32327e+08	163057197	4.43516e+08	3.67347e+08	3.26192e+08	4.96034e+08	2.31651e+08	4.08586e+08	3.5488e+08	3.4871e+08	3.59626e+08	1.16733e+09	5.51732e+08	4.7431e+08	1037.01	312.7	406.244	284.452	669.51	362.592	177.059	366.646	509.584	659.509	386.99	284.021	559.561	517.879	324.176
Q9ET61	Complement component C1q receptor OS=Rattus norvegicus OX=10116 GN=Cd93 PE=1 SV=1 - [C1QR1_RAT]	68.737	7.87338e+08	7.27664e+08	1.24798e+09	1.13175e+09	9.25155e+08	8.77107e+08	1.85772e+09	1.40147e+09	6.63844e+08	6.25586e+08	8.62542e+08	8.37188e+08	7.49715e+08	9.40995e+08	1.17343e+09	1.10568e+09	6.6824e+08	5.57655e+08	7.27367e+08	718772822	7.11285e+08	6.79821e+08	1.1593e+09	1259619810	9.26873e+08	9.16425e+08	6.6791e+08	8.21698e+08	6.37554e+08	1.06604e+09	1.04552e+09	8.84608e+08	1031.03	1368.28	1099.17	1109.15	827.525	1194.33	1425.38	1132.19	833.743	1065.89	947.065	1235.02	1310.85	1164.18	859.204
Q6P6Q2	Keratin, type II cytoskeletal 5 OS=Rattus norvegicus GN=Krt5 PE=1 SV=1 - [K2C5_RAT]	61.7877	4.00622e+08	4.95257e+07	7.95015e+07	2.88781e+08	255554272	2.14167e+08	8.63556e+07	3291752374	2.22576e+08	1.00649e+08	6.43554e+07	114888288	2.44176e+08	1.3421e+08	4.97373e+07	1.70147e+08	4.06413e+08	2.28839e+08	1.80581e+08	2.01822e+08	2.97309e+08	1.96781e+08	2.21423e+08	7.87329e+07	8.15121e+07	3.24484e+08	8.74203e+07	3.51188e+07	2.76916e+08	2.24611e+08	125002836	5.76437e+07	1027.46	188.151	47.96	723.772	695.342	489.312	390.253	2518.71	442.718	207.021	276.882	182.727	584.381	376.743	211.027
P83868	Prostaglandin E synthase 3 OS=Rattus norvegicus GN=Ptges3 PE=1 SV=2 - [TEBP_RAT]	18.7094	4.42987e+08	4.10727e+08	3.23389e+08	3.92003e+08	2.63598e+09	2.70869e+09	3.83019e+08	3.2016e+08	6.45123e+08	5.26414e+08	4.67036e+08	572510799	8.03e+08	4.33918e+09	6.88036e+09	7.14911e+08	6.60646e+08	6.79654e+08	7.05719e+08	7.70122e+08	7.64633e+08	796731795	6.94572e+08	7.92331e+08	4.86065e+08	4.13976e+09	5.13221e+08	4.99943e+08	6.4334e+08	6.98459e+08	5.57813e+08	5.27751e+08	1026.92	977.828	885.578	861.134	772.469	1086.35	787.598	726.896	910.582	1019.08	1099.25	1123.27	1239.01	943.978	907.866
P41499	Tyrosine-protein phosphatase non-receptor type 11 OS=Rattus norvegicus OX=10116 GN=Ptpn11 PE=1 SV=5 - [PTN11_RAT]	67.9901	9.54345e+07	8.56131e+07	1.02782e+08	1.03768e+08	1.11528e+08	9.91655e+07	9.2959e+07	9.51855e+07	1.36527e+08	1.34246e+08	1.42644e+08	1.36405e+08	1.33754e+08	1.18825e+08	1.45686e+08	1.63283e+08	1.67385e+08	1.23626e+08	7.65447e+07	1.28347e+08	1.4697e+08	1.56613e+08	1.87183e+08	8.58066e+07	6.84806e+07	1.18737e+08	1.34145e+08	1.17627e+08	1.27425e+08	1.38736e+08	162738857	1.32482e+08	1019.49	644.933	1010.16	980.516	1296.23	712.971	1441.96	1028.79	528.806	585.012	501.574	690.471	605.487	725.487	629.159
Q68FW9	COP9 signalosome complex subunit 3 OS=Rattus norvegicus GN=Cops3 PE=2 SV=1 - [CSN3_RAT]	47.828	8.82627e+07	9.41855e+07	1.11767e+08	1.29019e+08	8.53294e+07	1.02075e+08	1.14085e+08	1.06341e+08	1.00097e+08	8.79024e+07	8.853e+07	9.90511e+07	9.82279e+07	98153497	2.45277e+08	1.14423e+08	9.59684e+07	9.05872e+07	7.71095e+07	2.38405e+08	124936021	9.16394e+07	1.27616e+08	1.04195e+08	1.14169e+08	1.34401e+08	1.23684e+08	9.2673e+07	1.42406e+08	1.32735e+08	1.56789e+08	1.31043e+08	1019.28	677.973	1133.6	1292.04	676.59	914.137	1404.47	1555.59	600.105	619.645	636.604	734.127	559.113	621.224	839.687
P21670	Proteasome subunit alpha type-4 OS=Rattus norvegicus GN=Psma4 PE=1 SV=1 - [PSA4_RAT]	29.4792	1.26734e+08	3.30272e+08	2.98933e+08	4.2419e+08	3.55939e+08	4.0262e+08	2.37018e+08	1.64669e+08	3.66535e+08	337921630	3.7419e+08	4.04037e+08	3.98253e+08	3.788e+08	4.18835e+08	4.97848e+08	4.0477e+08	3.47355e+08	4.12571e+08	446918491	448742593	4.11801e+08	4.82974e+08	5.15414e+08	4.21242e+08	4.68847e+08	454630756	4.53393e+08	5.3878e+08	4.94149e+08	6.26981e+08	5.89014e+08	1018.56	2198.22	2110.79	2446.08	2205.89	2400.99	1852.91	1351.99	2316.98	1865.97	1989.08	1863.51	1609.05	1631.77	1964.65
P29066	Beta-arrestin-1 OS=Rattus norvegicus GN=Arrb1 PE=1 SV=1 - [ARRB1_RAT]	46.9902	1.60692e+08	1.35379e+08	1.52196e+08	2.00733e+08	2.49736e+08	1.8589e+08	1.74567e+08	1.70715e+08	1.1019e+09	9.23699e+07	1.11475e+08	9.75802e+07	1388746917	8.53887e+07	1.32794e+08	1.50175e+08	1.32977e+08	1.06517e+09	1.17488e+09	1.11589e+08	1.62693e+09	1.58288e+09	1.53615e+09	146579862	1.06979e+08	1.48496e+08	1.08662e+08	1.12383e+08	1.30446e+08	1.07912e+08	1.24692e+08	1.48732e+09	1015.59	564.102	957.193	735.833	634.93	680.137	1034.54	1141.27	233.607	532.963	290.51	484.293	327.568	334.182	339.965
P22985	Xanthine dehydrogenase/oxidase OS=Rattus norvegicus GN=Xdh PE=1 SV=3 - [XDH_RAT]	146.149	6.49992e+07	7.78807e+07	9.00834e+07	1.01048e+08	93701333	1.0702e+08	9.08828e+07	3.95295e+09	5.13267e+07	4.13126e+07	3.50004e+07	5.72067e+07	5.78512e+07	4.46295e+07	6.82449e+07	6.80823e+07	7.73958e+07	3.89107e+07	7.22324e+07	6.95894e+07	9.65157e+07	59038052	8.65533e+07	8.64862e+07	6.53505e+07	5.9506e+07	7.16735e+07	5.19066e+07	5.88775e+07	59942431	9.29755e+07	7.52098e+07	1010.33	892.923	1113.14	993.386	1044.88	1105.09	1068.66	1012.22	285.743	265.796	322.528	234.649	386.171	427.937	333.4
P00697	Lysozyme C-1 OS=Rattus norvegicus GN=Lyz1 PE=1 SV=2 - [LYSC1_RAT]	16.7183	2.72486e+08	6.02844e+08	2.79409e+08	4.09558e+08	4.60562e+08	3.76525e+08	1.98114e+08	2.13377e+08	5.0852e+08	4.40181e+08	3.70512e+08	4.3832e+08	5.7902e+08	509930748	3.33137e+08	5.22446e+08	5.53923e+08	4.35956e+08	5.49579e+08	6.52702e+08	6.70941e+08	5.95028e+08	4.91793e+08	5.0634e+08	9.71228e+08	7.07383e+08	4.73635e+08	5.86451e+08	610151918	6.28349e+08	5.18963e+08	4.98139e+08	1008.95	1384.06	1065.25	1236.26	1269.13	903.814	1051.22	1131.12	1176.48	1003.54	1041.87	1029.45	1056.63	1152.02	891.131
P26284	Pyruvate dehydrogenase E1 component subunit alpha, somatic form, mitochondrial OS=Rattus norvegicus GN=Pdha1 PE=1 SV=2 - [ODPA_RAT]	43.1986	1.33979e+08	1.70125e+08	1.7668e+08	1.96116e+08	132217023	1.91931e+08	1.75386e+08	1.58171e+08	2.08808e+08	2.18992e+08	2.32555e+08	2.4845e+08	2.34498e+08	2.02989e+08	2.5216e+08	2.96204e+08	281277964	2.66222e+08	2.80351e+08	2.38422e+08	3.18323e+08	2.62324e+08	3.23512e+08	322638716	2.64206e+08	2.44551e+08	2.6965e+08	292073330	3.20151e+08	289890735	3.1905e+08	3.2605e+08	1008.77	993.93	1015.49	836.127	590.733	960.25	1037.31	1187.87	805.293	995.585	777.371	943.645	506.103	738.023	649.749
P12007	Isovaleryl-CoA dehydrogenase, mitochondrial OS=Rattus norvegicus OX=10116 GN=Ivd PE=1 SV=2 - [IVD_RAT]	46.4058	4.87076e+07	49524852	7.97073e+07	6.84296e+07	5.20482e+07	1.01122e+08	7.02868e+07	5.45131e+07	63383601	9.03218e+07	6.43162e+07	9.99088e+07	7.1151e+07	6.99479e+07	6.75634e+07	7.47147e+07	1.29174e+08	1.10363e+08	1.17968e+08	8.91321e+07	1.3714e+08	1.3057e+08	9.36423e+07	1.288e+08	6.18228e+07	104653153	6.65641e+07	7.30849e+07	9.68153e+07	7.90534e+07	8.71638e+07	9.62605e+07	998.676	728.704	736.03	836.862	900.604	1181.44	1197.65	624.265	670.039	753.225	921.973	646.126	898.811	675.417	764.165
Q66HA8	Heat shock protein 105 kDa OS=Rattus norvegicus GN=Hsph1 PE=2 SV=1 - [HS105_RAT]	96.3574	1.54236e+08	1.14575e+08	1.66962e+08	1.7463e+08	1.40502e+08	1.22511e+08	1.75046e+08	1.95001e+08	1.71399e+08	1.85844e+08	1.70326e+08	260688022	2.08084e+08	1.87896e+08	2.37733e+08	2.90951e+08	2.18616e+08	2.13055e+08	224168360	251716068	2.60371e+08	2.15917e+08	2.69319e+08	2.9276e+08	2.24549e+08	2.3936e+08	2.36517e+08	2.31847e+08	2.64929e+08	2.80579e+08	2.88508e+08	305180727	997.932	538.323	1112.76	785.44	833.535	630.129	1077.45	1488.82	947.061	1358.84	1115.45	1325.98	1061.81	1235.65	1594.08
Q9JIL3	Interleukin enhancer-binding factor 3 OS=Rattus norvegicus GN=Ilf3 PE=1 SV=2 - [ILF3_RAT]	95.8753	8.81744e+07	3.74583e+08	1.00445e+08	1.19846e+08	1.25016e+08	5.08084e+08	9.40409e+07	9.78472e+07	1.01936e+08	8.93308e+07	1.07445e+08	1.2125e+08	1.1311e+08	8.01969e+07	1.30745e+08	1.40553e+08	1.32989e+08	1.09717e+08	1.23921e+08	1.33922e+08	1.59325e+08	1.3451e+08	1.69308e+08	1.84892e+08	1.06703e+08	130649936	1.28857e+08	1.28788e+08	1.78596e+08	1.43669e+08	1.55014e+08	1.44564e+08	997.234	964.913	1400.38	1391.3	1284.69	633.785	1441.1	1458.63	685.274	1035.33	1280.26	1296.1	757.584	521.183	1204.62
P53042	Serine/threonine-protein phosphatase 5 OS=Rattus norvegicus GN=Ppp5c PE=1 SV=1 - [PPP5_RAT]	56.8802	1.18482e+08	8.25644e+07	7.46091e+07	9.23735e+07	1.08302e+08	9.29258e+07	7.58993e+07	1.08999e+08	7.29332e+07	8.01826e+07	7.79845e+07	8.36449e+07	9.86894e+07	82549244	1.12241e+08	126532791	8.00673e+07	8.50281e+07	8.73787e+07	1.03892e+08	1.17454e+08	100787102	1.29502e+08	1.18819e+08	95649521	8.80675e+07	9.6282e+07	9.44537e+07	1.47377e+08	7.33773e+07	1.02415e+08	1.02907e+08	995.164	841.687	936.112	1038.06	985.492	683.028	1415.89	1307.94	553.607	819.78	893.819	773.506	821.277	1002.76	1192.37
P45479	Palmitoyl-protein thioesterase 1 OS=Rattus norvegicus GN=Ppt1 PE=1 SV=1 - [PPT1_RAT]	34.4324	1.57886e+08	2.63332e+08	1.96325e+08	2.19088e+08	2.22992e+08	3.28705e+08	2.23213e+08	1.70206e+08	2.50446e+08	2.09564e+08	2.73041e+08	261884854	2.94864e+08	2.57083e+08	2.96207e+08	321847833	3.07646e+08	3.27168e+08	4.26206e+08	412405791	4.80323e+08	3.39813e+08	4.51342e+08	5.11539e+08	2.57765e+08	2.87137e+08	3.48098e+08	2.83885e+08	3.14447e+08	3.93089e+08	3.52383e+08	3.24538e+08	992.488	736.372	998.883	1084.7	679.737	1037.4	827.675	844.663	939.943	925.484	778.072	928.023	893.064	1000.12	1061.22
P04961	Proliferating cell nuclear antigen OS=Rattus norvegicus GN=Pcna PE=1 SV=1 - [PCNA_RAT]	28.7303	1.30018e+08	1.60051e+08	1.41231e+08	1.9867e+08	1.39521e+08	1.96651e+08	1.42235e+08	1.45557e+08	3.20714e+08	2.95856e+08	3.07622e+08	3.10571e+08	3.39968e+08	3.33819e+08	3.54663e+08	4.02694e+08	351857931	2.84418e+08	343555912	3.76103e+08	4.06414e+08	3.8097e+08	4.06879e+08	423672235	2.74857e+08	2.9939e+08	2.73809e+08	2.29454e+08	2.73075e+08	2.73003e+08	330508534	3.09823e+08	988.158	1159.29	1142.62	1113.04	617.023	983.977	1108.11	902.462	2038.13	2081.78	1787.67	1846.54	1876.34	2118.31	1889.38
Q641W2	UPF0160 protein MYG1, mitochondrial OS=Rattus norvegicus GN=Myg1 PE=1 SV=1 - [MYG1_RAT]	42.8617	5.61074e+07	3.70451e+07	9.13616e+07	7.1403e+07	6.93592e+07	5.40969e+07	1.05693e+08	7.2982e+07	3.59675e+07	4.74002e+07	56503872	1.25412e+08	4.67588e+07	5.07799e+07	7.50284e+07	8.91272e+07	68646264	59537750	7.17763e+07	6.53796e+07	8.03101e+07	1.35677e+08	7.37572e+07	7.14445e+07	4.95598e+07	6.89179e+07	7.81011e+07	7.79649e+07	8.28012e+07	8.21863e+07	8.77433e+07	7.78759e+07	986.119	129.172	686.161	347.363	538.361	409.13	1206.39	935.679	218.388	225.741	324.777	260.197	225.812	275.386	358.98
P08461	Dihydrolipoyllysine-residue acetyltransferase component of pyruvate dehydrogenase complex, mitochondrial OS=Rattus norvegicus GN=Dlat PE=1 SV=3 - [ODP2_RAT]	67.1234	1.27202e+08	1.03329e+08	1.54954e+08	1.45114e+08	8.85583e+07	1.20883e+08	1.40483e+08	1.67064e+08	1.60582e+08	142812811	1.89316e+08	1.83898e+08	1.64719e+08	1.55248e+08	2.23528e+08	2.5452e+08	1.78815e+08	1.51892e+08	2.12205e+08	2.12062e+08	1.90105e+08	178283745	226050308	2.74396e+08	197258054	1.99637e+08	226514239	2.34526e+08	2.27634e+08	247076744	2.85228e+08	247481523	985.344	395.601	832.455	568.444	339.454	657.51	725.454	573.29	546.85	348.155	461.095	404.602	440.533	393.142	535.17
P50475	Alanine--tRNA ligase, cytoplasmic OS=Rattus norvegicus GN=Aars PE=1 SV=3 - [SYAC_RAT]	106.723	3.2982e+08	7.6066e+07	4.25007e+08	4.62418e+08	5.08697e+07	3.57376e+08	7.75382e+07	3.86894e+08	4.14176e+08	3.35546e+08	5.27182e+08	4.65018e+08	9.67839e+07	9.24959e+07	525579275	1.24418e+08	114129387	3.55813e+08	6.43805e+08	5.4031e+08	1.28003e+08	1.20441e+08	5.3473e+08	1.58377e+08	4.30222e+08	9.62647e+08	485691648	5.85974e+08	1356573014	4.78323e+08	1.60928e+08	4.85528e+08	978.925	1200.65	1105.29	1279.24	907.625	1304.84	1814.58	1789.7	924.496	1494.85	1555.29	1439.72	1358.92	1391.02	1267.85
Q9Z339	Glutathione S-transferase omega-1 OS=Rattus norvegicus GN=Gsto1 PE=1 SV=2 - [GSTO1_RAT]	27.651	1.45602e+08	1.29576e+08	1.7423e+08	1.69816e+08	1.80412e+08	1.58004e+08	1.88136e+08	1.79909e+08	1.7286e+08	1.53001e+08	1.76512e+08	2.11074e+08	1.89039e+08	1.71302e+08	2.27754e+08	2.45442e+08	1.9751e+08	2.21493e+08	2.10782e+08	2.26735e+08	2.51613e+08	2.19971e+08	2.77657e+08	2.46994e+08	2.07672e+08	2.30317e+08	258928718	2.34005e+08	2.2423e+08	2.82953e+08	2.6481e+08	2.58184e+08	972.053	614.399	959.178	604.817	543.016	137.411	652.312	877.315	826.084	802.247	701.703	964.015	773.361	765.808	840.445
Q5XI28	Ribonucleoprotein PTB-binding 1 OS=Rattus norvegicus OX=10116 GN=Raver1 PE=1 SV=1 - [RAVR1_RAT]	79.2398	6.38136e+07	4.1041e+07	9.42333e+07	6.27206e+07	6.9276e+07	6.12328e+07	9.13519e+07	91146337	4.91215e+07	4.46026e+07	5.53149e+07	4.22005e+07	4.93536e+07	5.70505e+07	7.31731e+07	6.41554e+07	5.51382e+07	2.93622e+07	6.85405e+07	5.06963e+07	5.71375e+07	5.97486e+07	6.78716e+07	6.60181e+07	4.75251e+07	89648086	6.79612e+07	7.26776e+07	7.14768e+07	7.52558e+07	1.45972e+08	6.31369e+07	964.691	679.697	1075.96	699.493	927.065	686.87	1133.91	937.647	303.695	280.726	417.952	290.77	377.844	543.393	504.023
P70470	Acyl-protein thioesterase 1 OS=Rattus norvegicus GN=Lypla1 PE=1 SV=1 - [LYPA1_RAT]	24.6923	3.2942e+09	2.83733e+09	4.0176e+09	3.76153e+09	3.85701e+09	3.21671e+09	4.41144e+09	4.60887e+09	5759970831	5.62338e+09	6.59218e+09	6.37906e+09	5.85183e+09	3.71643e+09	6.89695e+09	6.26421e+09	5.55038e+09	6.14022e+09	6.13539e+09	5.95281e+09	3.05126e+09	5.74671e+09	7324180276	5.86921e+09	5.95852e+09	4.88802e+09	6.60386e+09	6.39954e+09	5.84226e+09	7.10762e+09	5.70315e+09	5.36485e+09	957.693	565.502	853.756	777.767	1097.93	568.206	1028.5	777.742	781.368	894.539	999.045	1027.98	702.389	861.271	1086.38
Q4G063	Cysteine-rich with EGF-like domain protein 2 OS=Rattus norvegicus GN=Creld2 PE=1 SV=1 - [CREL2_RAT]	38.2249	6.67864e+07	8.01881e+07	6.08571e+07	8.03843e+07	8.60455e+07	7.87782e+07	1.06519e+08	1.02747e+08	1.24414e+08	1.12635e+08	1.16511e+08	1.17624e+08	1.30536e+08	1.19517e+08	1.54608e+08	1.54891e+08	1.35318e+08	1.27816e+08	1.46934e+08	1.35397e+08	1.52939e+08	1.53377e+08	1.68769e+08	1.63387e+08	1.11928e+08	1.09984e+08	1.17716e+08	1.35197e+08	1.49348e+08	1.53021e+08	1.42421e+08	1.15128e+08	952.936	598.219	855.074	776.998	869.798	604.336	1001.95	815.496	894.363	840.827	846.787	1036.75	807.145	779.052	1018.88
Q9JK11	Reticulon-4 OS=Rattus norvegicus GN=Rtn4 PE=1 SV=1 - [RTN4_RAT]	126.31	1.93432e+08	2.74164e+08	2.0227e+08	2.94849e+08	1.74595e+08	2.94032e+08	2.61903e+08	2.39372e+08	2.36322e+08	2.20388e+08	2.34491e+08	2.7647e+08	2.44804e+08	2.35719e+08	3.0506e+08	369349886	2.65418e+08	2.38786e+08	371251276	3.29782e+08	3.89717e+08	3.19489e+08	3.38144e+08	4.20571e+08	2.6041e+08	281023263	3.32709e+08	3.13877e+08	2.84781e+08	3.50572e+08	4.27626e+08	3.50035e+08	948.779	1129.63	1117.73	972.515	643.217	779.945	879.148	860.312	832.95	813.269	677.739	873.903	334.24	610.449	725.044
P61972	Nuclear transport factor 2 OS=Rattus norvegicus GN=Nutf2 PE=1 SV=1 - [NTF2_RAT]	14.469	6.08426e+08	4.86435e+08	7.49413e+08	7.0942e+08	7.08095e+08	4.77095e+08	8.19238e+08	8.35884e+08	702942301	5.77007e+08	5.83142e+08	7.81449e+08	7.68899e+08	6.98785e+08	9.67499e+08	9.92143e+08	8.43756e+08	6.47179e+08	7.77505e+08	8.42022e+08	7.91929e+08	7.72995e+08	9.82133e+08	7.75927e+08	6.88639e+08	7.98845e+08	8.47119e+08	7.18811e+08	1.01944e+09	9.49773e+08	9.78967e+08	5.42736e+08	946.05	649.532	1149.3	919.361	1156.08	701.842	1084.82	1233.4	781.903	765.101	794.182	664.512	750.989	769.569	888.602
O55004	Ribonuclease 4 OS=Rattus norvegicus GN=Rnase4 PE=1 SV=1 - [RNAS4_RAT]	16.8923	1.60665e+08	131186068	1.48187e+08	1.5752e+08	1.76872e+08	1.21745e+08	1.49375e+08	1.26383e+08	1.43412e+08	1.22908e+08	1.08537e+08	1.41644e+08	1.07701e+08	7.86717e+07	9.91554e+07	1.04966e+08	1.65171e+08	1.35295e+08	1.64907e+08	1.28448e+08	1.41869e+08	1.15544e+08	1.34517e+08	186233022	1.16108e+08	1.07016e+08	142892190	145132688	1.61793e+08	1.65119e+08	1.22026e+08	1.05709e+08	943.116	785.448	731.34	1020.81	902.57	653.954	927.227	701.004	493.472	439.443	860.344	985.139	578.352	516.798	511.252
B5DFC9	Nidogen-2 OS=Rattus norvegicus GN=Nid2 PE=2 SV=1 - [NID2_RAT]	152.88	1.24578e+08	2.54836e+08	1.65352e+08	2.75444e+08	2.5018e+08	5.70986e+08	2.27958e+08	1.90528e+08	1.50347e+08	112935109	2.42177e+08	2.26246e+08	2.33255e+08	2.39427e+08	3.62654e+08	285778541	1.79084e+08	1.37539e+08	2.54572e+08	212560977	3.14169e+08	217293713	3.32473e+08	3.51264e+08	200112814	2.50349e+08	2.6554e+08	2.5925e+08	2.84443e+08	3.06232e+08	3.73149e+08	3.114e+08	932.996	712.78	819.359	886.463	563.621	1105.65	1022.38	603.176	341.84	637.645	520.978	595.123	999.615	922.711	754.27
Q6AYP5	Cell adhesion molecule 1 OS=Rattus norvegicus OX=10116 GN=Cadm1 PE=1 SV=1 - [CADM1_RAT]	51.821	1.66494e+08	1.42835e+08	1.63683e+08	1.91788e+08	184843198	2.2257e+08	1.50389e+08	1.79313e+08	72176298	5.17602e+07	6.95112e+07	6.32947e+07	7.45365e+07	5.92088e+07	8.00955e+07	7.09815e+07	8.22693e+07	6.43687e+07	7.79677e+07	4.55494e+07	7.11541e+07	5.57312e+07	8.25808e+07	7.01479e+07	6.75658e+07	1.09202e+08	7.14477e+07	3.51197e+08	9.00895e+07	8.99424e+07	9.19856e+07	8.32162e+07	932.9	940.116	1119.16	1193.27	1270.94	1087.75	1219.24	1315.23	259.563	75.2467	281.994	271.554	352.315	151.812	297.962
Q6P734	Plasma protease C1 inhibitor OS=Rattus norvegicus GN=Serping1 PE=2 SV=1 - [IC1_RAT]	55.5762	1.01301e+08	1.04952e+08	1.41229e+08	1.43921e+08	2.45391e+08	1.41972e+08	1.38919e+08	1.33267e+08	1.89148e+08	1.65591e+08	1.99381e+08	2.1482e+08	2.31298e+08	1.99484e+08	2.38175e+08	2.68158e+08	1.98778e+08	179074427	2.15561e+08	2.40677e+08	2.341e+08	2.318e+08	2.39509e+08	269275401	1.92835e+08	2.12181e+08	2.14104e+08	2.17139e+08	2.15094e+08	235807576	267589630	2.54113e+08	920.38	1239.29	1431.38	1334.6	1220.55	1233.68	1582.79	1726.55	1481.12	1728.68	1712.32	1514.29	1850.89	1765	2049.43
P47245	Nardilysin OS=Rattus norvegicus GN=Nrdc PE=1 SV=1 - [NRDC_RAT]	132.892	3.76315e+07	3.67225e+07	5.2517e+07	5.1831e+07	5.46419e+07	4.94644e+07	5.29669e+07	5.44651e+07	3.07786e+07	2.66843e+07	3.49698e+07	3.40324e+07	4.73431e+07	4.26908e+07	5.96814e+07	6.54841e+07	4.14634e+07	3.15543e+07	5.19385e+07	3.53474e+07	5.6404e+07	4.13592e+07	6.84816e+07	6.78147e+07	4.63631e+07	5.82003e+07	5.92164e+07	6.24385e+07	6.35555e+07	7.44159e+07	8.11293e+07	7.60119e+07	919.438	366.99	1352.02	553.775	778.165	317.333	1299.74	1197.41	137.535	258.1	293.626	332.397	243.278	267.626	451.018
Q4FZU2	Keratin, type II cytoskeletal 6A OS=Rattus norvegicus GN=Krt6a PE=1 SV=1 - [K2C6A_RAT]	59.2127	5.83066e+08	4.95257e+07	7.95015e+07	3.40354e+08	8.27124e+08	2.74803e+08	1.29834e+08	2.7861e+09	2.47041e+08	1.00649e+08	7.75134e+07	114888288	5.93084e+08	4.26379e+08	4.05039e+08	1.84804e+08	7.97799e+08	452033563	1.80581e+08	6.03867e+08	3.30783e+08	1.96781e+08	2.21423e+08	7.08194e+07	3.88101e+08	4.19192e+08	9.88088e+07	34567499	3.53493e+08	509011706	1.45495e+08	6.918e+07	917.283	188.151	51.15	497.937	638.286	373.315	424.622	2320.5	427.297	193.939	295.65	172.39	485.359	334.278	195.199
Q9WU49	Calcium-regulated heat stable protein 1 OS=Rattus norvegicus GN=Carhsp1 PE=1 SV=1 - [CHSP1_RAT]	15.896	4.84677e+08	4.29678e+08	2.96404e+08	3.95457e+08	4.19306e+08	4.7776e+08	3.53739e+08	2.67255e+08	544411069	590724358	3.23982e+08	4.7612e+08	3.87123e+08	6.18293e+08	4.34221e+08	4.81973e+08	5.74624e+08	4.62919e+08	5.20636e+08	6.18671e+08	4.78789e+08	6.10509e+08	5.37931e+08	5.63454e+08	4.7714e+08	392580537	5.9997e+08	287348486	5.4878e+08	5.943e+08	3.82938e+08	4.37484e+08	914.433	1136.9	1000.29	908.869	981.42	901.45	602.594	801.053	570.292	498.798	552.544	745.047	432.77	647.422	533.742
Q8K586	GTP-binding nuclear protein Ran, testis-specific isoform OS=Rattus norvegicus GN=Rasl2-9 PE=2 SV=1 - [RANT_RAT]	24.4355	1166377007	1.23103e+09	1.44512e+09	1.4387e+09	1.50688e+09	1.31558e+09	1.63671e+09	1.59347e+09	1.9967e+09	1.88443e+09	2.21756e+09	2119615329	2.02562e+09	1.93286e+09	2.51114e+09	2.57697e+09	2.28388e+09	2.22036e+09	2.41318e+09	2.29568e+09	2.52046e+09	2.5172e+09	2.71739e+09	2.80059e+09	1.87372e+09	1.84653e+09	2.12132e+09	2.17064e+09	2.38023e+09	2.33019e+09	2.59682e+09	2.16955e+09	914.182	745.175	945.668	839.439	1076.84	944.718	942.567	943.94	784.042	776.883	656.945	846.714	973.621	877.043	913.112
P10960	Sulfated glycoprotein 1 OS=Rattus norvegicus GN=Psap PE=1 SV=1 - [SAP_RAT]	61.0836	2.84043e+08	2.18598e+08	1.84495e+08	210474525	3.93211e+08	3.17439e+08	1.55042e+08	7.50176e+07	5.98915e+08	3.74277e+08	4.14423e+08	4.81085e+08	5.77077e+08	4.48744e+08	4.58413e+08	5.22053e+08	7.49355e+08	6.31917e+08	542744746	6.13162e+08	6.96967e+08	666160945	7.18227e+08	550970786	5.99343e+08	6.39919e+08	6.07129e+08	4.61145e+08	664726834	7.34833e+08	5.03235e+08	5.31332e+08	913.837	591.113	607.184	671.654	660.699	676.556	547.284	590.588	1125.9	1112.63	907.323	1125.25	1185.12	1229.44	921.973
P62161	Calmodulin OS=Rattus norvegicus GN=Calm1 PE=1 SV=2 - [CALM_RAT]	16.8268	1.16389e+08	1.90838e+08	1.82588e+08	1.92128e+08	1.12088e+08	1.44748e+08	141149462	1.40487e+08	1.14724e+08	2.13036e+08	1.35958e+08	2.02853e+08	1.38934e+08	1.31523e+08	2.00723e+08	3.03161e+08	1.80493e+08	223736432	2.12225e+08	164317273	1.3158e+08	1.91077e+08	2.90131e+08	2.16583e+08	9.68895e+07	1.29909e+08	144450772	1.95608e+08	9.35504e+07	2.03122e+08	1.58713e+08	2.11847e+08	911.955	1600	984.027	1262.33	635.408	772.167	626.392	743.436	762.663	1370.51	738.126	1232.45	878.575	745.491	1242.38
P63074	Eukaryotic translation initiation factor 4E OS=Rattus norvegicus GN=Eif4e PE=1 SV=1 - [IF4E_RAT]	25.0375	1.32091e+08	9.14338e+07	1.60986e+08	1.27584e+08	1.4917e+08	1.15993e+08	1.86485e+08	1.52018e+08	1.26367e+08	1.17304e+08	1.46487e+08	145324654	1.42711e+08	1.33474e+08	1.66827e+08	1.73391e+08	1.63441e+08	1.32885e+08	1.65794e+08	1.77433e+08	181312698	1.74696e+08	226497916	1.92741e+08	1.17479e+08	1.08932e+08	1.43803e+08	1.31117e+08	1.72185e+08	1.88917e+08	1.74485e+08	145671014	909.845	580.884	980.31	781.18	970.01	600.473	1291.71	962.728	751.694	695.946	718.063	704.255	603.5	658.52	667.33
Q5M9G3	Caprin-1 OS=Rattus norvegicus GN=Caprin1 PE=1 SV=2 - [CAPR1_RAT]	78.0729	7.372e+07	9.63609e+07	9.44128e+07	1.11186e+08	9.62645e+07	1.2026e+08	8.03669e+07	9.4196e+07	2.50172e+08	2.19896e+08	2.25544e+08	231597175	2.52015e+08	1.92227e+08	2.44326e+08	2.71905e+08	2.57044e+08	1.87495e+08	2.24726e+08	2.40318e+08	2.61971e+08	2.49782e+08	2.57595e+08	2.55423e+08	156634600	1.74786e+08	1.48869e+08	1.2355e+08	1.48992e+08	1.59226e+08	1.67263e+08	1.6778e+08	902.498	977.72	737.724	800.217	732.408	751.812	807.654	922.487	1787.39	1401.13	1318.04	1734.5	1775.51	1665.02	1667.81
B0BNM1	NAD(P)H-hydrate epimerase OS=Rattus norvegicus GN=Apoa1bp PE=2 SV=1 - [NNRE_RAT]	30.8707	1.64576e+08	1.99249e+08	1.93482e+08	2.31095e+08	1.99331e+08	2.71103e+08	2.20302e+08	2.52135e+08	2.93721e+08	2.62793e+08	3.10553e+08	2.97595e+08	3.07011e+08	2.86993e+08	3.3878e+08	4.24827e+08	336940539	2.75001e+08	3.56838e+08	3.31992e+08	3.8682e+08	2.91075e+08	3.29857e+08	3.66646e+08	2.90126e+08	3.37126e+08	3.2929e+08	2.78206e+08	4.18242e+08	3.83384e+08	3.24897e+08	317568818	902.402	847.59	965.204	1003.8	786.481	958.679	1036.84	992.369	1258.81	1051.19	979.516	853.267	1213.21	1180.16	1294.87
P10959	Carboxylesterase 1C OS=Rattus norvegicus GN=Ces1c PE=1 SV=3 - [EST1C_RAT]	60.1365	1.13417e+08	1.57723e+08	1.36712e+08	4.32206e+08	2.41958e+08	6.58965e+07	2.2762e+08	1.52673e+08	2.49015e+08	2.34947e+08	232165008	4.5379e+08	2.47878e+08	2.7802e+08	3.16027e+08	3.45568e+08	2.36858e+08	2.17367e+08	422912391	2.69772e+08	2.7213e+08	2.06457e+08	3.04782e+08	3.04824e+08	2.72429e+08	2.67151e+08	3.2692e+08	2.62268e+08	3.31243e+08	3.59722e+08	6.3895e+08	3.39087e+08	896.537	546.268	877.88	878.743	982.957	898.073	1159.78	1315.13	1083.26	1337.68	1163.81	1206.81	1549.77	1655.4	1650.91
P10688	1-phosphatidylinositol 4,5-bisphosphate phosphodiesterase delta-1 OS=Rattus norvegicus GN=Plcd1 PE=1 SV=1 - [PLCD1_RAT]	85.908	7.62922e+07	5.96811e+07	8.6408e+07	8.92242e+07	85611614	71399562	8.47671e+07	8.55255e+07	7.29344e+07	5.18015e+07	7.79627e+07	8.06865e+07	8.17836e+07	7.605e+07	1.12722e+08	1.14187e+08	8.94672e+07	6.33709e+07	8.51694e+07	9.02857e+07	9.48528e+07	5.67042e+07	1.08988e+08	1.14874e+08	7.67062e+07	106974464	9.22252e+07	9.65441e+07	1.04984e+08	1.06265e+08	1.31524e+08	8.97367e+07	891.719	429.799	1093.68	717.795	710.925	600.222	928.821	1171.37	208.103	233.862	468.358	397.851	278.51	351.569	450.195
P37805	Transgelin-3 OS=Rattus norvegicus GN=Tagln3 PE=1 SV=2 - [TAGL3_RAT]	22.4862	5.92009e+08	3.3385e+08	5.00983e+08	5.96469e+08	5.0792e+08	377478271	371966046	6.05948e+08	2.94785e+08	2.76285e+08	3.62232e+08	3.85632e+08	369501306	2.70323e+08	5.75762e+08	1.6332e+09	4.78197e+08	3.21804e+08	3.66487e+08	5.75935e+08	4.18667e+08	5.83395e+08	8.63323e+08	5.82195e+08	2.81876e+08	2.98358e+08	4.88737e+08	3.73692e+08	2.95748e+08	650684720	4.9264e+08	4.49536e+08	888.693	799.456	940.524	853.872	642.765	250.571	352.393	885.803	814.13	641.173	715.795	735.225	250.01	308.553	431.894
Q63347	26S protease regulatory subunit 7 OS=Rattus norvegicus GN=Psmc2 PE=1 SV=3 - [PRS7_RAT]	48.5441	5.10212e+07	1.04838e+08	7.72221e+07	1.23518e+08	4.04044e+07	1.44994e+08	5.57102e+07	5.6567e+07	1.19616e+08	9.34634e+07	1.07103e+08	119242829	1.2741e+08	1.00496e+08	1.41073e+08	1.50359e+08	1.31505e+08	8.3257e+07	1.64613e+08	1.69431e+08	176065388	1.37416e+08	1.54562e+08	2.37729e+08	137706066	1.24454e+08	1.20678e+08	1.30747e+08	1.13014e+08	1.37374e+08	1.84156e+08	1.91877e+08	887.669	1658.09	1047.09	1623.55	389.263	1713.86	1019.84	1042.48	1164.82	950.523	1005.83	984.361	979.025	1306.65	1152.05
P62994	Growth factor receptor-bound protein 2 OS=Rattus norvegicus GN=Grb2 PE=1 SV=1 - [GRB2_RAT]	25.1904	1.28916e+08	1.3317e+08	1.28489e+08	1.24996e+08	1.2452e+08	1.01287e+08	8.56296e+07	1.00433e+08	1.4535e+08	1.44437e+08	1.25652e+08	1.31671e+08	1.28734e+08	9.47553e+07	1.38661e+08	1.47604e+08	1.46836e+08	1.46171e+08	1.56135e+08	1.60995e+08	144407763	1.24887e+08	1.86806e+08	1.27936e+08	1.43559e+08	1.67829e+08	1.43193e+08	1.38883e+08	1.42631e+08	1.51515e+08	1.43396e+08	1.17289e+08	885.376	654.411	768.623	657.604	507.776	395.246	389.906	903.223	593.246	680.896	568.672	919.71	404.67	255.596	469.398
Q4KLF8	Actin-related protein 2/3 complex subunit 5 OS=Rattus norvegicus GN=Arpc5 PE=1 SV=3 - [ARPC5_RAT]	16.3103	2.11488e+08	3.04996e+08	2.65342e+08	2.693e+08	3.02487e+08	2.6022e+08	1.52421e+08	2.44617e+08	3.51603e+08	2.81985e+08	2.00504e+08	2.92211e+08	3.72313e+08	2.68707e+08	317593005	4.48536e+08	4.22192e+08	3.39936e+08	3.77548e+08	464413410	4.07379e+08	3.56684e+08	500190075	3.79039e+08	417523022	4.04713e+08	3.55249e+08	4.17321e+08	318293516	4.18585e+08	4.79686e+08	4.20092e+08	882.689	334.418	345.268	395.228	698.646	556.059	264.337	502.014	493.122	438.257	332.686	458.619	542.854	306.154	411.755
P26772	10 kDa heat shock protein, mitochondrial OS=Rattus norvegicus GN=Hspe1 PE=1 SV=3 - [CH10_RAT]	10.8949	2.55333e+08	1.6434e+08	1.67281e+08	191502311	2.57517e+08	1.96238e+08	1.2147e+08	2.6189e+08	5.87217e+08	5.43605e+08	3.95279e+08	5.63588e+08	5.55085e+08	5.48502e+08	5.81792e+08	6.7441e+08	7.09095e+08	6.94008e+08	4.98149e+08	5.9831e+08	7.43899e+08	5.89593e+08	8.16016e+08	6.15935e+08	556469536	6.08064e+08	6.08026e+08	4.78813e+08	6.58864e+08	8.06047e+08	507544366	6.17601e+08	878.145	643.941	706.833	387.354	756.566	448.727	389.544	878.497	1463.7	1405.6	1291.58	1313.97	1030.08	1011.89	1017.18
Q925G0	RNA-binding protein 3 OS=Rattus norvegicus GN=Rbm3 PE=1 SV=2 - [RBM3_RAT]	16.8448	3.24896e+08	4.45792e+08	2.42316e+08	3.82177e+08	4.56154e+08	7.55255e+08	221121005	2.34564e+08	8.59989e+08	6.44137e+08	6.33185e+08	6.471e+08	9.62848e+08	6.58276e+08	6.14711e+08	1.16532e+09	9.85071e+08	6.72711e+08	1.07516e+09	8.18862e+08	1.25815e+09	9.55473e+08	9.47151e+08	1.17027e+09	6.71406e+08	7.95605e+08	5.01973e+08	5.97257e+08	9.68437e+08	7.89352e+08	6.56503e+08	7.04131e+08	876.801	886.655	827.644	946.19	824.41	678.622	720.839	391.064	945.847	1007.09	1002.86	1167.16	942.327	932.849	671.065
P70580	Membrane-associated progesterone receptor component 1 OS=Rattus norvegicus OX=10116 GN=Pgrmc1 PE=1 SV=3 - [PGRC1_RAT]	21.5847	6.31923e+07	7.18443e+07	6.42312e+07	8.21841e+07	7.24858e+07	101037887	5.85546e+07	7.34717e+07	9.44124e+07	1.37031e+08	8.17492e+07	8.9179e+07	1.00159e+08	9.94779e+07	1.15456e+08	1.36971e+08	1.28102e+08	1.53322e+08	1.51478e+08	1.30549e+08	1.16917e+08	1.62458e+08	1.24192e+08	1.66718e+08	1.00435e+08	1.56004e+08	1.19495e+08	1.28928e+08	1.15373e+08	1.38801e+08	1.51086e+08	1.52966e+08	875.67	1151.98	753.205	1137.18	910.546	939.709	935.055	1428.83	1182.68	1418.5	1153.27	1297.94	1397.12	1129.22	1341.15
Q7TP98	Interleukin enhancer-binding factor 2 OS=Rattus norvegicus GN=Ilf2 PE=2 SV=1 - [ILF2_RAT]	51.3485	1.25014e+08	1.21455e+08	1.59902e+08	1.79526e+08	1.6272e+08	1.52634e+08	1.60867e+08	1.47291e+08	1.11077e+08	1.03921e+08	1.35563e+08	1.55504e+08	1.37832e+08	117579181	1.88205e+08	2.07034e+08	1.48866e+08	1.3568e+08	2.04695e+08	2.03794e+08	2.30226e+08	1.89183e+08	2.51862e+08	2.59966e+08	1.6042e+08	1.65863e+08	1.80769e+08	1.93682e+08	1.83219e+08	1.76515e+08	2.302e+08	2.43942e+08	866.215	884.343	1043.66	1046.41	1041.67	872.871	824.087	1370.41	668.415	838.194	907.431	882.453	752.864	685.537	1197.02
P37996	ADP-ribosylation factor-like protein 3 OS=Rattus norvegicus GN=Arl3 PE=1 SV=2 - [ARL3_RAT]	20.4438	1.34723e+08	1.06802e+08	1.06083e+08	113672088	1.13326e+08	1.48952e+08	9.76915e+07	1.64582e+08	1.25221e+08	1.27341e+08	1.27734e+08	1.38578e+08	1.2536e+08	1.61415e+08	1.78975e+08	2.38999e+08	1.51656e+08	1.47529e+08	1.71205e+08	1.90339e+08	1.76424e+08	1.86614e+08	2.11923e+08	2.32399e+08	120497912	1.29855e+08	1.31316e+08	1.68181e+08	169300861	1.51703e+08	2.0084e+08	1.9335e+08	860.652	414.725	811.776	385.404	321.669	306.193	691.711	823.988	404.17	434.289	409.534	580.116	297.75	549.286	483.65
P63329	Serine/threonine-protein phosphatase 2B catalytic subunit alpha isoform OS=Rattus norvegicus GN=Ppp3ca PE=1 SV=1 - [PP2BA_RAT]	58.6063	1.19223e+08	1.09663e+08	1.41418e+08	1.52766e+08	1.23071e+08	1.37195e+08	148498838	1.63262e+08	1.56429e+08	1.49343e+08	1.79544e+08	1.77442e+08	1.16754e+08	9.9909e+07	2.08706e+08	1.98626e+08	1.69576e+08	1.59076e+08	1.56106e+08	191041421	1.36497e+08	1.59679e+08	2.11555e+08	2.09719e+08	1.85224e+08	1.7327e+08	2.01155e+08	1.56213e+08	1.51961e+08	1.80002e+08	1.94795e+08	2.11064e+08	859.435	863.924	777.013	1033.75	694.982	596.948	778.563	1001.46	843.877	747.135	791.883	976.999	632.913	465.151	741.848
Q5U2Y1	General transcription factor II-I OS=Rattus norvegicus GN=Gtf2i PE=1 SV=2 - [GTF2I_RAT]	110.146	1.22451e+08	1.01944e+08	1.37754e+08	1.18526e+08	1.14905e+08	6.82176e+07	1.38695e+08	1.09807e+08	1.25266e+08	1.00316e+08	1.15708e+08	237483589	1.24147e+08	1.09465e+08	139618301	1.38938e+08	1.29663e+08	9.71351e+07	1.2108e+08	1.36407e+08	1.2586e+08	1.16877e+08	1.50243e+08	1.44607e+08	1.22069e+08	5.02669e+08	1.12461e+08	7.93438e+07	1.18686e+08	1.34154e+08	129013369	1.04173e+08	857.441	846.359	926.327	985.998	728.07	904.005	884.719	706.524	957.557	854.234	819.772	938.973	744.383	653.582	689.471
Q01986	Dual specificity mitogen-activated protein kinase kinase 1 OS=Rattus norvegicus GN=Map2k1 PE=1 SV=2 - [MP2K1_RAT]	43.4374	5.13971e+07	6.87634e+07	7.18132e+07	7.7657e+07	7.528e+07	9.60026e+07	1.02244e+08	9.73544e+07	7.88971e+07	6.46363e+07	8.33531e+07	8.81456e+07	1.09845e+08	1.04913e+08	9.64312e+07	1.28992e+08	1.02314e+08	6.1959e+07	1.13113e+08	9.0351e+07	1.30023e+08	1.21672e+08	1.1272e+08	1.48811e+08	7.74598e+07	9.62296e+07	9.15588e+07	6.68835e+07	1.1682e+08	1.04083e+08	9.58919e+07	1.06677e+08	854.799	508.709	687.218	741.208	640.874	614.155	457.886	844.698	702.021	888.942	691.348	728.394	771.706	709.917	689.897
O09175	Aminopeptidase B OS=Rattus norvegicus GN=Rnpep PE=1 SV=2 - [AMPB_RAT]	72.5733	1.08315e+08	9.90288e+07	1.36645e+08	1.3728e+08	1.23795e+08	1.02654e+08	1.61782e+08	1.64793e+08	9.64458e+07	9.71375e+07	1.11356e+08	1.1875e+08	9.89877e+07	9.30757e+07	1.31619e+08	1.34853e+08	1.20064e+08	1.22755e+08	1.0922e+08	1.05083e+08	1.15478e+08	9.26162e+07	1.33254e+08	1.50612e+08	1.07688e+08	1.16699e+08	1.32369e+08	1.44697e+08	1.42832e+08	1.53139e+08	1.54409e+08	1.31106e+08	852.92	709.103	972.205	917.513	783.037	594.803	1247.96	1070.48	833.524	784.192	712.633	896.592	679.046	558.312	822.296
P15650	Long-chain specific acyl-CoA dehydrogenase, mitochondrial OS=Rattus norvegicus GN=Acadl PE=1 SV=1 - [ACADL_RAT]	47.8424	7.95855e+07	126943436	1.19795e+08	1.6768e+08	1.01012e+08	1.68076e+08	1.32983e+08	1.39228e+08	1.67345e+08	162617786	1.86103e+08	1.74632e+08	2.09908e+08	1.78783e+08	2.10712e+08	2.25833e+08	1.90882e+08	1.73333e+08	3.4027e+08	2.74176e+08	3.29487e+08	2.8714e+08	2.76119e+08	2.98017e+08	2.3847e+08	229551244	2.37284e+08	2.46874e+08	232157182	2.43928e+08	2.87332e+08	2.83172e+08	850.406	1336.89	1493.01	1521.16	1329.21	975.508	1721.82	1544.68	1554.49	1614.84	1384.76	1515.68	1540.83	1464.86	1264.05
Q9JLA3	UDP-glucose:glycoprotein glucosyltransferase 1 OS=Rattus norvegicus GN=Uggt1 PE=1 SV=2 - [UGGG1_RAT]	176.32	4.47126e+07	1.09057e+08	7.12923e+07	1.55185e+08	6.81907e+07	1.83286e+08	8.1698e+07	6.63415e+07	1.40244e+08	1.22769e+08	1.51509e+08	1.53025e+08	1.59569e+08	1.34068e+08	1.55604e+08	1.97057e+08	1.6179e+08	1.09011e+08	2.10327e+08	1.98023e+08	2.28046e+08	1.54361e+08	2.33914e+08	2.1534e+08	1.78793e+08	2.16119e+08	1.56492e+08	1.75564e+08	2.24426e+08	1.92018e+08	2.70262e+08	2.55195e+08	849.757	2512.31	1277.26	2876.68	1726.26	3282.06	1372.17	1624.95	2650.81	2761.73	2781.21	2256.56	3012.14	2872.97	2392.41
P19132	Ferritin heavy chain OS=Rattus norvegicus GN=Fth1 PE=1 SV=3 - [FRIH_RAT]	21.1133	1.84382e+08	9.207e+07	1.58247e+08	1.02708e+08	1.03401e+08	5.73396e+07	1.08283e+08	1.48508e+08	1.38393e+08	1.48291e+08	126265363	189686443	1.09546e+08	8.53705e+07	1.5193e+08	1.78806e+08	2.13196e+08	1.96151e+08	1.30513e+08	1.71079e+08	1.55813e+08	1.45464e+08	2.03056e+08	1.8421e+08	1.49178e+08	1.5206e+08	1.84756e+08	1.51178e+08	1.51597e+08	2.01481e+08	1.38137e+08	186888634	849.088	804.102	926.392	708.022	546.424	378.626	698.891	734.697	631.075	697.993	671.796	677.133	512.191	376.797	698.275
Q10758	Keratin, type II cytoskeletal 8 OS=Rattus norvegicus GN=Krt8 PE=1 SV=3 - [K2C8_RAT]	53.9853	1.9877e+08	1.32876e+08	2.11884e+08	2.17401e+08	2.20362e+08	1.228e+08	1.98041e+08	2.02783e+09	3.13014e+08	2.76254e+08	3.26127e+08	3.31221e+08	308131904	2.6713e+08	3.84841e+08	3.89616e+08	3.94527e+08	3.32118e+08	4.26573e+08	4.41084e+08	4.06456e+08	3.77241e+08	5.44901e+08	5.14634e+08	2.23117e+08	281509335	3.05758e+08	2.89756e+08	2.25305e+08	3.25878e+08	2.97721e+08	2.88348e+08	841.29	244.333	390.079	871.707	840.082	632.372	334.977	1680.49	1641.31	1512.35	1806.78	1712.9	2181.7	1857.32	1485.86
P34064	Proteasome subunit alpha type-5 OS=Rattus norvegicus GN=Psma5 PE=2 SV=1 - [PSA5_RAT]	26.3742	1.96018e+08	4.5683e+08	4.10725e+08	5.04361e+08	4.94499e+08	5.08361e+08	3.16561e+08	2.27462e+08	5.19135e+08	4.78487e+08	5.12953e+08	5.39109e+08	5.78371e+08	4.70017e+08	5.6159e+08	6.5177e+08	5.72816e+08	4.61648e+08	6.45163e+08	6.42225e+08	6.94952e+08	6.28333e+08	7.2367e+08	6.91137e+08	6.27661e+08	6.10319e+08	6.4425e+08	5.90958e+08	6.86582e+08	7.07484e+08	7.55481e+08	7.59142e+08	841.074	1143.26	1376.07	1324.59	1551.99	1149.53	1160.66	684.357	1185.45	1199.68	1119.12	1132.45	1130.05	1171.21	1042.09
Q68FU3	Electron transfer flavoprotein subunit beta OS=Rattus norvegicus GN=Etfb PE=2 SV=3 - [ETFB_RAT]	27.6701	1.00741e+08	1.50767e+08	1.06847e+08	1.58164e+08	1.00473e+08	1.78088e+08	1.01975e+08	1.30519e+08	3.21916e+08	3.07224e+08	281031859	3.05257e+08	348979062	3.36893e+08	3.02649e+08	3.57214e+08	3.87633e+08	3.40644e+08	4.08491e+08	439928720	4.67908e+08	4.05293e+08	4.52948e+08	4.93694e+08	263060209	3.22789e+08	2.62833e+08	2.64272e+08	2.76867e+08	3.32507e+08	3.46864e+08	3.27781e+08	840.767	1086.3	901.339	790.56	511.364	1174.93	818.207	755.936	2088.34	2384.15	1916.29	2197.72	2180.86	2110.04	1949
P61078	Ubiquitin-conjugating enzyme E2 D3 OS=Rattus norvegicus GN=Ube2d3 PE=2 SV=1 - [UB2D3_RAT]	16.6764	2.68667e+08	2.59886e+08	3.30692e+08	3.93567e+08	3.50798e+08	3.39985e+08	3.94446e+08	3.52181e+08	3.76872e+08	3.36901e+08	4.07352e+08	4.00919e+08	3.96848e+08	3.60624e+08	5.18879e+08	5.24163e+08	4.99409e+08	3.58067e+08	4.92046e+08	4.4739e+08	5.595e+08	4.43023e+08	6.51314e+08	4.74251e+08	4.40222e+08	472153214	4.26153e+08	4.62179e+08	5.56269e+08	5.18631e+08	5.46979e+08	5.11627e+08	840.727	653.746	788.817	751.591	756.989	744.683	893.309	875.321	759.449	978.807	620.078	803.947	794.666	728.754	809.271
P09117	Fructose-bisphosphate aldolase C OS=Rattus norvegicus GN=Aldoc PE=1 SV=3 - [ALDOC_RAT]	39.2592	618447220	2.76174e+08	5.86336e+08	466767237	5.69848e+08	3.22127e+08	6.40826e+08	5.80631e+08	4.66283e+08	4.0283e+08	4.52384e+08	517091956	4.14056e+08	429521649	4.99011e+08	5.49489e+08	567628211	5.35184e+08	4.98784e+08	4.99783e+08	4.87878e+08	4.42164e+08	5.17277e+08	5.96138e+08	4.61107e+08	5.15996e+08	5.10284e+08	4.55096e+08	5.88291e+08	492816354	5.6446e+08	5.29405e+08	839.602	420.687	1031.05	790.477	675.283	516.987	1228.92	1066.66	460.6	449.069	717.931	507.835	411.679	443.443	467.382
Q9JLZ1	Glutaredoxin-3 OS=Rattus norvegicus GN=Glrx3 PE=1 SV=2 - [GLRX3_RAT]	37.8254	1.08008e+08	1.14969e+08	1.38075e+08	1.38522e+08	1.39749e+08	1.31634e+08	1.24286e+08	1.30678e+08	1.74449e+08	1.51157e+08	1.64248e+08	1.9221e+08	1.73939e+08	1.59898e+08	1.81223e+08	2.26163e+08	201524548	1.50545e+08	150764601	1.69063e+08	1.93118e+08	1.6613e+08	2.31424e+08	202966820	1.51076e+08	1.75507e+08	1.62714e+08	1.75642e+08	1.89736e+08	1.83575e+08	1.90493e+08	1.93001e+08	838.584	761.472	873.839	803.006	812.26	575.786	831.401	1018.97	1040.15	1054.3	1134.03	942.101	1036.11	714.135	898.271
P24329	Thiosulfate sulfurtransferase OS=Rattus norvegicus GN=Tst PE=1 SV=3 - [THTR_RAT]	33.3858	7.56018e+08	9.52327e+08	1.1952e+09	1.11132e+09	1.37779e+09	8.84221e+08	1.04381e+09	8.45104e+08	1.27742e+09	1.20919e+09	1160231152	1.30978e+09	1.28711e+09	237350953	1.06281e+09	1.33601e+09	1.5381e+09	1.33262e+09	1315671245	1.32721e+09	1.618e+09	1.35131e+09	1.50106e+09	1.26245e+09	1.29409e+09	1.28382e+09	1.26551e+09	1.28934e+09	1.49488e+09	1.58784e+09	1240561767	1.34489e+09	833.248	919.035	1224.98	715.459	655.676	626.101	1030.65	541.667	386.449	627.568	521.353	580.268	341.522	316.817	363.417
P18298	S-adenosylmethionine synthase isoform type-2 OS=Rattus norvegicus GN=Mat2a PE=1 SV=1 - [METK2_RAT]	43.6883	1.38715e+08	1.41306e+08	1.6886e+08	1.64277e+08	1.47604e+08	163931029	1.83096e+08	1.42137e+08	1.93843e+08	1.83081e+08	2.15736e+08	2.2962e+08	2.18445e+08	1.97639e+08	2.46628e+08	2.90189e+08	2.18827e+08	191642343	2.52732e+08	2.3578e+08	2.76578e+08	2.71467e+08	305487630	2.97431e+08	1.88524e+08	2.16502e+08	2.47218e+08	2.15619e+08	2.3891e+08	2.50613e+08	2.77738e+08	2.6744e+08	830.158	716.652	775.319	897.495	711.228	657.011	900.897	996.41	903.137	823.088	1031.66	1006.38	832.109	714.918	880.529
P29411	GTP:AMP phosphotransferase AK3, mitochondrial OS=Rattus norvegicus GN=Ak3 PE=2 SV=2 - [KAD3_RAT]	25.4225	1.1733e+08	1.06318e+08	1.41587e+08	1.26217e+08	1.17451e+08	1.30693e+08	1.55671e+08	1.53356e+08	1.83344e+08	1.40796e+08	1.80611e+08	2.01511e+08	2.12378e+08	2.04954e+08	6.84932e+08	2.68825e+08	2.21438e+08	1.38579e+08	3.03115e+08	2.64504e+08	2.77144e+08	195937027	3.438e+08	313712040	2.28449e+08	2.49434e+08	266376485	2.65701e+08	2.48427e+08	283389943	2.51265e+08	2.2995e+08	824.122	486.376	759.183	618.724	717.991	663.893	1103.93	960.676	552.879	694.281	765.045	776.787	606.638	552.756	638.329
Q66HR2	Microtubule-associated protein RP/EB family member 1 OS=Rattus norvegicus GN=Mapre1 PE=1 SV=3 - [MARE1_RAT]	29.9852	1.35952e+08	4.17115e+08	206397201	3.74547e+08	298688652	531057531	2.06609e+08	1.68032e+08	4.27906e+08	3.23312e+08	3.52902e+08	3.89693e+08	3.91334e+08	3.12471e+08	3.53228e+08	4.16575e+08	3.66149e+08	2.36775e+08	5.85292e+08	5.87737e+08	6.38021e+08	5.0415e+08	5.71099e+08	583695122	4.00758e+08	4.68415e+08	361712125	3.7681e+08	378417139	4.24769e+08	6.38656e+08	6.05824e+08	820.786	1507.26	1257.98	1366.57	1400.73	1368.35	1294.06	945.392	1343.77	1215.89	1067	1154.75	1404	1207.76	849.069
P41542	General vesicular transport factor p115 OS=Rattus norvegicus GN=Uso1 PE=1 SV=1 - [USO1_RAT]	107.096	5.76856e+07	7.77057e+07	6.94491e+07	91122410	2.0309e+07	7.71334e+07	9.51349e+07	1.01315e+08	3.46693e+07	4.09863e+07	3.56392e+07	4.2238e+07	4.80509e+07	3.78657e+07	4.89648e+07	5.58269e+07	4.36908e+07	3.44192e+07	5.68298e+07	5.44472e+07	5.75e+07	66035359	5.96542e+07	6.26052e+07	4.82562e+07	64434178	7.50847e+07	6.29863e+07	6.8359e+07	8.02938e+07	8.91376e+07	8.20306e+07	820.709	1109.55	1469.26	1328.58	283.35	910.087	1518.62	1806.46	595.399	537.43	402.503	487.862	613.617	809.423	494.825
P01041	Cystatin-B OS=Rattus norvegicus GN=Cstb PE=1 SV=1 - [CYTB_RAT]	11.1886	7.01582e+08	5.25665e+08	6.38175e+08	6.3414e+08	8.56672e+08	591939628	6.76243e+08	7.41558e+08	7.80031e+08	7.1955e+08	7.40293e+08	878700442	8.62674e+08	780589169	8.61188e+08	1.0293e+09	8.49289e+08	7.64865e+08	8.30248e+08	8.4666e+08	1.0998e+09	8.93138e+08	1.06657e+09	1.0734e+09	6.92456e+08	7.41353e+08	8.03945e+08	8.06353e+08	1.08087e+09	1.10756e+09	8.89389e+08	9.95764e+08	819.08	811.495	896.41	1001.64	936.682	774.527	991.499	869.521	832.242	863.532	668.464	751.855	852.362	979.038	857.547
P97687	Ectonucleoside triphosphate diphosphohydrolase 1 OS=Rattus norvegicus GN=Entpd1 PE=1 SV=1 - [ENTP1_RAT]	57.3708	77905640	1.41794e+08	1.12242e+08	1.72548e+08	9.07286e+07	1.68308e+08	9.04773e+07	1.01938e+08	5.99728e+07	8.17188e+07	6.26971e+07	1.14044e+08	6.68689e+07	6.97465e+07	6.37653e+07	8.206e+07	8.25704e+07	3.36262e+07	6.75471e+07	7.04057e+07	8.13989e+07	5.11669e+07	86431718	1.02011e+08	6.87901e+07	8.19298e+07	6.79193e+07	8.35172e+07	8.77886e+07	8.55642e+07	1.12289e+08	9.92073e+07	816.509	803.533	873.408	738.502	735.34	850.297	705.623	749.209	178.061	167.873	193.206	205.985	298.637	259.959	407.329
Q5U211	Sorting nexin-3 OS=Rattus norvegicus GN=Snx3 PE=1 SV=1 - [SNX3_RAT]	18.7508	2.00029e+08	2.53221e+08	1.80947e+08	1.79389e+08	2.64746e+08	1.93038e+08	1.24954e+08	1.45184e+08	279633514	1.94165e+08	2.15726e+08	1.90588e+08	2.7842e+08	2.38985e+08	242085805	2.00599e+08	3.46541e+08	1.6579e+08	3.22199e+08	3.58906e+08	3.56968e+08	3.26908e+08	3.91395e+08	3.29377e+08	3.28246e+08	3.08716e+08	2.83374e+08	2.64714e+08	2.0648e+08	3.25776e+08	3.00075e+08	1.91091e+08	809.863	540.124	529.31	328.37	691.352	455.956	295.489	243.822	451.829	324.675	329.868	180.087	576.734	511.506	421.276
P52759	Ribonuclease UK114 OS=Rattus norvegicus GN=Hrsp12 PE=1 SV=3 - [UK114_RAT]	14.2946	2.30978e+08	2.28539e+08	3.07805e+08	2.92729e+08	3.02071e+08	218543326	3.45998e+08	3.10947e+08	2.72151e+08	232588512	3.57555e+08	2.77132e+08	3.22004e+08	305714788	407286086	4.09892e+08	355274334	3.11518e+08	3.88685e+08	384280309	3.80637e+08	3.67885e+08	449169461	4.53789e+08	3.14327e+08	3.22322e+08	3.54358e+08	3.64437e+08	4.3204e+08	3.89146e+08	4.02733e+08	379256073	809.637	897.466	754.36	698.663	982.122	792.483	1006.91	828.572	540.97	556.343	772.013	474.698	839.352	749.357	791.371
Q07205	Eukaryotic translation initiation factor 5 OS=Rattus norvegicus GN=Eif5 PE=1 SV=1 - [IF5_RAT]	48.9237	1.28361e+08	1.42008e+08	1.44335e+08	1.72264e+08	143277829	1.76678e+08	170451089	1.37315e+08	1.56742e+08	1.34298e+08	1.53647e+08	1.57956e+08	1.67081e+08	1.58521e+08	2.15438e+08	249450902	1.86472e+08	1.34746e+08	1.73936e+08	1.85334e+08	2.00322e+08	164337966	2.44762e+08	2.18786e+08	171354302	1.69584e+08	1.73515e+08	1.7504e+08	2.13824e+08	1.64766e+08	2.30725e+08	2.10467e+08	808.832	725.368	1133.62	985.203	971.2	952.578	1005.12	921.591	738.655	794.706	713.878	796.568	692.962	934.032	791.674
Q5M7U6	Actin-related protein 2 OS=Rattus norvegicus GN=Actr2 PE=1 SV=1 - [ARP2_RAT]	44.7052	1.38898e+08	281369647	1.52133e+08	2.63391e+08	1.61085e+08	2.85415e+08	1.50633e+08	1.43149e+08	2.35092e+08	1.97298e+08	2.45385e+08	2.19654e+08	259278953	1.34443e+08	1.78265e+08	2.20726e+08	2.36411e+08	1.79239e+08	3.71728e+08	3.66576e+08	3.23675e+08	2.54705e+08	250642626	2.93401e+08	354825590	2.76121e+08	2.46551e+08	2.13441e+08	2.2993e+08	3.10082e+08	4.34183e+08	485740169	803.644	2157.11	1532.62	1672.38	808.115	2005.35	1275.6	1244.29	1671.22	1378.2	1246.47	834.893	1524.2	1053.12	696.82
Q62638	Golgi apparatus protein 1 OS=Rattus norvegicus GN=Glg1 PE=1 SV=1 - [GSLG1_RAT]	133.469	4.23503e+08	4.18709e+08	4.94781e+08	4.4428e+08	4.30965e+08	3.21034e+08	4.94727e+08	4.76516e+08	7.21482e+08	6.76573e+08	7.67335e+08	7.4929e+08	7.52352e+08	6.63496e+08	8.07509e+08	8.71436e+08	7.48344e+08	7.49316e+08	8.07166e+08	8.00655e+08	8.30943e+08	7.9354e+08	8.23433e+08	8.7948e+08	6.85116e+08	7.27393e+08	8.18988e+08	7.75421e+08	8.3068e+08	8.63853e+08	8.31949e+08	755070373	799.588	2074.9	1418.22	2104.67	1129.76	2476.72	1232.75	1448.6	2313.19	2109.62	2213.71	2123.16	2856.59	2531.9	2612.97
Q00657	Chondroitin sulfate proteoglycan 4 OS=Rattus norvegicus OX=10116 GN=Cspg4 PE=1 SV=2 - [CSPG4_RAT]	251.754	40853971	5.32722e+07	5.46259e+07	5.7574e+07	5.64606e+07	6.16699e+07	6.7342e+07	62988084	3.11461e+07	1.69014e+07	1.25277e+08	2.42523e+07	3.05078e+07	2.42028e+07	4.09192e+07	4.24045e+07	3.0851e+07	2.1019e+07	2.95892e+07	31874456	4.02505e+07	2.59126e+07	3.67771e+07	4.79518e+07	3.41093e+07	39398276	3.76821e+07	3.07548e+07	4.28429e+07	4.09583e+07	4.63039e+07	4.3861e+07	797.24	1059.41	1039.58	1250.23	1132.12	1017.42	1383.42	1161.97	154.925	360.46	448.011	238.649	324.015	609.016	302.878
Q8K3X8	Heat shock factor-binding protein 1 OS=Rattus norvegicus OX=10116 GN=Hsbp1 PE=3 SV=1 - [HSBP1_RAT]	8.57921	1.53906e+08	1.70658e+08	8.79919e+07	1.3851e+08	2.73222e+08	1.91272e+08	1.39609e+08	1.5548e+08	3.4394e+08	1.62973e+08	2.04969e+08	2.62778e+08	2.25679e+08	2.00427e+08	2.60519e+08	3.86203e+08	2.65276e+08	1.48363e+08	1.88441e+08	4.12909e+08	3.56278e+08	1.94022e+08	3.93531e+08	3.5331e+08	2.16946e+08	2.62355e+08	2.30795e+08	2.32499e+08	3.61162e+08	2.56379e+08	2.63774e+08	3.34052e+08	794.489	650.005	637.809	771.652	1007.65	708.889	677.587	871.605	959.123	737.759	994.904	1314.27	910.43	814.31	1089.82
P06757	Alcohol dehydrogenase 1 OS=Rattus norvegicus OX=10116 GN=Adh1 PE=1 SV=3 - [ADH1_RAT]	39.6195	1.51473e+08	3.46013e+08	1.81875e+08	3.20496e+08	1.61294e+08	4.7183e+08	1.94168e+08	1.55865e+08	7.08326e+08	5.6784e+08	6.62982e+08	658937143	8.49504e+08	7.73281e+08	6.40624e+08	8.87936e+08	9.12871e+08	667554838	1.15368e+09	1.13108e+09	1.26856e+09	1.16778e+09	1.12569e+09	1.26043e+09	6.93235e+08	8.34566e+08	6.51186e+08	6.83239e+08	675691651	7.96993e+08	1.08912e+09	1.01675e+09	793.41	1845.02	919.503	1766.91	711.289	2310.93	651.014	657.715	3240.26	3166.13	3590.16	3480.22	3672.58	4209.21	3438.22
Q63396	Activated RNA polymerase II transcriptional coactivator p15 OS=Rattus norvegicus GN=Sub1 PE=2 SV=3 - [TCP4_RAT]	14.4324	2.69608e+08	3.69072e+08	2.94758e+08	2.85357e+08	476652232	4.31642e+08	3.34566e+08	3.43137e+08	3.28823e+08	3.11538e+08	3.30607e+08	2.44595e+08	3.85684e+08	1.65469e+08	3.57651e+08	3.63632e+08	4.38675e+08	4.05827e+08	3.96478e+08	4.61967e+08	329806084	4.37258e+08	4.94581e+08	4.94299e+08	3.07341e+08	3.79965e+08	4.04293e+08	2.93034e+08	5.13649e+08	4.93753e+08	3.76065e+08	4.88853e+08	793.355	612.465	327.336	413.692	661.721	387.607	387.398	308.063	574.256	560.651	589.028	456.169	286.01	465.607	271.605
P62961	Nuclease-sensitive element-binding protein 1 OS=Rattus norvegicus GN=Ybx1 PE=2 SV=3 - [YBOX1_RAT]	35.7086	7.62254e+07	1.11396e+08	2.44168e+07	6.66312e+07	1.01358e+08	1.30057e+08	5.08263e+07	4.76697e+07	8.5714e+07	1.07429e+08	1.25783e+08	1.20166e+08	1.86409e+08	1.85784e+08	1.42252e+08	1.90757e+08	1.69619e+08	1.54695e+08	1.61932e+08	1.38927e+08	1.95734e+08	1.78387e+08	1.72923e+08	1.86006e+08	1.15992e+08	1.4728e+08	5.60645e+07	1.13745e+08	1.67907e+08	1.30238e+08	1.15281e+08	1.46813e+08	789.85	941.104	542.728	784.958	755.564	1033.3	666.886	918.091	680.209	623.888	719.047	557.191	737.066	661.413	815.002
Q5RJP0	Aldose reductase-related protein 1 OS=Rattus norvegicus GN=Akr1b7 PE=1 SV=1 - [ALD1_RAT]	36.0989	3.38596e+08	2.95315e+08	4.74577e+08	4.57281e+08	3.51111e+08	3.00281e+08	4.13637e+08	3.911e+08	5.08058e+08	4.90277e+08	6.1064e+08	594591647	513872188	5.20687e+08	6.6674e+08	732836448	5.20795e+08	5.13138e+08	599149482	5.57359e+08	5.85733e+08	5.15854e+08	717533179	7.01262e+08	4.61913e+08	509285672	5.77132e+08	6.02714e+08	6.19615e+08	5.98882e+08	6.38875e+08	6.686e+08	788.998	612.473	935.012	794.676	722.917	398.173	953.122	944.112	1259.44	1607.45	1656.15	1620.9	1333.62	1274.79	1224.33
Q3SWU3	Heterogeneous nuclear ribonucleoprotein D-like OS=Rattus norvegicus GN=Hnrnpdl PE=2 SV=1 - [HNRDL_RAT]	35.2723	8.94438e+08	6.67128e+08	1.0008e+09	8.97893e+08	1.08567e+09	8.83462e+08	8.73096e+08	1.00128e+09	9.09521e+08	7.5862e+08	8.467e+08	8.8914e+08	1.35689e+09	9.18008e+08	9.79152e+08	1.17397e+09	1.10992e+09	8.91867e+08	1.10178e+09	1.08058e+09	1.2036e+09	1.10201e+09	1195227837	1.17873e+09	8.08678e+08	9.18113e+08	8.49065e+08	7.62616e+08	1.02456e+09	9.84617e+08	9.4675e+08	1.03143e+09	788.914	682.15	786.997	703.715	891.31	699.505	643.634	792.489	919.121	883.3	614.973	911.353	641.572	575.221	750.19
P68101	Eukaryotic translation initiation factor 2 subunit 1 OS=Rattus norvegicus GN=Eif2s1 PE=1 SV=2 - [IF2A_RAT]	36.0854	1.02709e+08	1.44947e+08	1.76591e+08	2.01173e+08	9.66287e+07	1.50409e+08	1.19239e+08	8.79958e+07	143218386	1.1372e+08	1.44251e+08	1.37919e+08	1.9053e+08	1.50059e+08	1.81859e+08	2.14948e+08	1.52372e+08	1.2581e+08	2.0903e+08	2.06691e+08	2.92809e+08	2.30609e+08	2.18108e+08	2.62979e+08	1.53216e+08	1.92225e+08	1.51804e+08	1.50845e+08	1.62205e+08	1.8287e+08	2.3245e+08	2.26782e+08	783.961	1329.99	787.023	1210.29	782.425	1375.91	931.726	1073.3	1574.04	1530.02	1388.26	1184.32	1572.71	1596.06	1636.67
P63004	Platelet-activating factor acetylhydrolase IB subunit alpha OS=Rattus norvegicus GN=Pafah1b1 PE=1 SV=2 - [LIS1_RAT]	46.6401	1.09066e+08	1.09118e+08	1.46385e+08	1.33332e+08	4.43026e+07	1.13428e+08	1.52738e+08	1.61238e+08	1.13821e+08	1.31419e+08	1.22089e+08	1.30853e+08	1.57188e+08	7.67997e+07	1.50452e+08	1.59868e+08	146099666	1.37359e+08	1.46538e+08	1.6661e+08	1.95453e+08	1.30606e+08	2.0727e+08	2.04219e+08	1.18876e+08	5.05255e+08	6.11819e+08	1.21805e+08	9.45223e+07	1.73175e+08	1.26663e+08	9.68499e+07	781.999	601.199	1028.98	769.389	159.827	652.584	836.498	872.379	648.365	668.153	545.756	702.497	761.815	389.252	555.306
Q641Z8	Peflin OS=Rattus norvegicus GN=Pef1 PE=2 SV=1 - [PEF1_RAT]	29.9932	7.64298e+07	4.22891e+07	7.26711e+07	7.20142e+07	8.76811e+07	7.85226e+07	1.27255e+08	1.33422e+08	1.05827e+08	7.51242e+07	1.07916e+08	1.34792e+08	1.15936e+08	1.07682e+08	2.09251e+08	1.83882e+08	9.84065e+07	8.4174e+07	1.38142e+08	1.63956e+08	1.49176e+08	1.84806e+08	2.51113e+08	1.74046e+08	1.10435e+08	1.31333e+08	164631986	1.1668e+08	1.47388e+08	1.11063e+08	1.76291e+08	1.2602e+08	781.445	648.561	1118.44	1114.89	967.455	904.326	1395.41	1076.97	511.737	722.199	768.856	1338.51	857.957	867.802	1117.41
P40112	Proteasome subunit beta type-3 OS=Rattus norvegicus GN=Psmb3 PE=1 SV=1 - [PSB3_RAT]	22.9494	55227999	2.20895e+08	2.0751e+08	2.75415e+08	2.50418e+08	3.28513e+08	1.23956e+08	7.24004e+07	2.55257e+08	2.22747e+08	2.4468e+08	2.46806e+08	2.69621e+08	2.496e+08	2.64475e+08	3.17598e+08	2.59894e+08	2.30362e+08	2.72984e+08	2.62894e+08	3.21253e+08	2.79898e+08	2.68157e+08	3.1967e+08	3.08195e+08	3.68687e+08	3.23489e+08	2.94481e+08	4.04198e+08	3.39156e+08	4.12928e+08	3.69087e+08	773.669	1445.5	1391.08	1489.81	1279.66	1417.44	1091.83	662.306	1152.51	1413.94	1086.39	1396.65	1444.39	1019.89	1283.92
P53534	Glycogen phosphorylase, brain form (Fragment) OS=Rattus norvegicus GN=Pygb PE=1 SV=3 - [PYGB_RAT]	96.1131	9.13381e+07	2.34553e+08	136431197	243796324	9.33412e+07	2.691e+08	1.30935e+08	1.12942e+08	2.78801e+08	286182752	2.83217e+08	261348493	304327998	2.76816e+08	2.51246e+08	3.32895e+08	334948281	2.64157e+08	4.28331e+08	3.99879e+08	4.31555e+08	3.7234e+08	3.72557e+08	4.31498e+08	2.77974e+08	2.97083e+08	2.48099e+08	2.68362e+08	2.40715e+08	2.87448e+08	3.77891e+08	378492827	770.516	2629.19	1519.72	2454.13	743.701	3407.71	1076.74	1894.9	3579.52	3632.16	3220.54	2825.45	3859.7	3395.77	2830.05
P16290	Phosphoglycerate mutase 2 OS=Rattus norvegicus GN=Pgam2 PE=2 SV=2 - [PGAM2_RAT]	28.7368	3.30389e+08	2.74565e+08	4.69103e+08	4.14367e+08	3.56233e+08	2.70701e+08	5.70176e+08	4.60928e+08	4.2602e+08	3.87557e+08	6.20176e+08	6.01254e+08	2.69293e+08	2.88949e+08	5.68291e+08	5.2113e+08	4.83441e+08	3.77398e+08	7.24934e+08	5.79845e+08	3.02923e+08	3.05881e+08	5.61679e+08	6.17212e+08	3.71855e+08	3.5515e+08	6.06606e+08	6.77002e+08	3.01882e+08	4.53299e+08	5.34821e+08	4.81807e+08	762.343	529.406	802.283	864.019	789.154	504.674	887.143	1080.37	571.568	591.852	659.153	730.047	618.32	469.417	681.173
Q6IFV1	Keratin, type I cytoskeletal 14 OS=Rattus norvegicus GN=Krt14 PE=2 SV=1 - [K1C14_RAT]	52.6509	3.46147e+08	1.30977e+08	1.80864e+08	261017333	1.29868e+08	8.9736e+07	7.60786e+07	2.39767e+09	250068677	1.20731e+08	2.79332e+08	2.5764e+08	2.01196e+08	1.07095e+08	1.19324e+08	1.74934e+08	3.25599e+08	2.06182e+08	2.56349e+08	2.8124e+08	1.9732e+08	1.68332e+08	1.83258e+08	173436447	195533601	2.44981e+08	2.2051e+08	2.49884e+08	1.58882e+08	1.90983e+08	1.78693e+08	1.31295e+08	762.117	239.723	290.936	684.204	528.215	322.228	302.744	5071.21	782.399	279.508	270.497	347.876	324.376	250.785	211.287
Q9ERB4	Versican core protein (Fragments) OS=Rattus norvegicus GN=Vcan PE=2 SV=2 - [CSPG2_RAT]	299.821	1.49056e+08	2.11547e+08	7.69666e+07	6.58417e+07	7.60696e+07	5.14125e+07	8.13605e+07	92018792	1.01784e+08	981866486	2.76601e+08	3.00743e+08	1.75723e+08	2.47714e+08	3.2256e+08	1.34913e+08	1.24943e+08	1.23803e+08	187374693	3.51594e+08	1.65344e+08	3.72671e+08	4.90539e+08	1.52137e+08	9.94168e+07	1.51798e+08	3.31162e+08	271366540	1.90062e+08	3.95019e+08	3.81056e+08	2.94596e+08	761.82	341.21	560.622	400	527.35	440.527	652.5	664.589	854.189	829.958	903.814	996.013	801.787	678.21	770.431
Q498E0	Thioredoxin domain-containing protein 12 OS=Rattus norvegicus GN=Txndc12 PE=2 SV=2 - [TXD12_RAT]	19.0065	2.2948e+08	1.64653e+08	2.52651e+08	2.20762e+08	2.12225e+08	8.72205e+07	1.84535e+08	2.47802e+08	3.84228e+08	3.37569e+08	3.22896e+08	3.78853e+08	2.99719e+08	233391131	4.05337e+08	4.80864e+08	442276277	3.34138e+08	3.39065e+08	3.89411e+08	3.03418e+08	2.57987e+08	4.29278e+08	3.24026e+08	3.39217e+08	3.96813e+08	4.27841e+08	2.84858e+08	3.13051e+08	4.06021e+08	3.11554e+08	3.79085e+08	760.911	381.933	781.265	543.662	575.499	207.493	771.694	919.854	852.213	799.027	736.355	986.507	618.778	516.07	856.331
Q566C7	Diphosphoinositol polyphosphate phosphohydrolase 1 OS=Rattus norvegicus GN=Nudt3 PE=1 SV=1 - [NUDT3_RAT]	19.0836	1.09448e+08	9.41077e+07	1.2244e+08	1.12903e+08	1.39375e+08	9.44091e+07	1.25793e+08	1.06067e+08	7.62564e+07	1.04103e+08	9.88099e+07	1.1453e+08	9.96497e+07	1.01268e+08	1.21584e+08	1.29234e+08	1.23254e+08	1.29148e+08	1.23655e+08	1.18973e+08	1.43062e+08	1.10336e+08	1.42644e+08	1.5034e+08	1.02759e+08	1.0845e+08	1.14685e+08	1.15943e+08	1.30348e+08	1.33602e+08	1.19195e+08	1.20089e+08	745.632	795.81	873.067	584.091	890.07	650.61	855.135	956.101	538.9	619.772	648.788	595.606	617.333	819.231	916.603
Q01205	Dihydrolipoyllysine-residue succinyltransferase component of 2-oxoglutarate dehydrogenase complex, mitochondrial OS=Rattus norvegicus GN=Dlst PE=1 SV=2 - [ODO2_RAT]	48.8944	9.96888e+07	1.79954e+08	1.53363e+08	2.02579e+08	1.91946e+08	2.26294e+08	1.69407e+08	1.57723e+08	2.5235e+08	257178696	2.97449e+08	2.9092e+08	291441360	2.94284e+08	3.05505e+08	3.79338e+08	2.8734e+08	2.67207e+08	3.85876e+08	3.38262e+08	3.67195e+08	3.22455e+08	3.55068e+08	4.13849e+08	3.16423e+08	3.24872e+08	3.61575e+08	357978898	3.96653e+08	3.854e+08	422397546	4.11911e+08	744.614	1099.7	1196.44	1184.58	1221.18	938.456	815.405	998.722	1453.25	1212.51	1583.21	1400.5	1298.8	1353.08	1481.73
P54001	Prolyl 4-hydroxylase subunit alpha-1 OS=Rattus norvegicus GN=P4ha1 PE=2 SV=2 - [P4HA1_RAT]	60.8596	7.1013e+07	5.48907e+07	6.5845e+07	7.2122e+07	7.29217e+07	4.09414e+07	7.83214e+07	6.45829e+07	2.68008e+07	2.98596e+07	9.23046e+08	3.49842e+07	4.6724e+07	6.26018e+07	47496764	4.43147e+07	5.93119e+07	3.93411e+07	52462660	3.98924e+07	4.44339e+07	3.30248e+07	9.60564e+07	5.60568e+07	2.68882e+07	3.16199e+07	3.4691e+07	4.25943e+07	52201495	2.66294e+07	3.93995e+07	3.60299e+07	744.412	402.755	621.434	683.126	688.915	449.444	695.606	571.625	171.7	191.923	294.544	335.254	182.291	136.37	257.621
D3ZD05	KN motif and ankyrin repeat domain-containing protein 2 OS=Rattus norvegicus OX=10116 GN=Kank2 PE=1 SV=2 - [KANK2_RAT]	90.8278	3.61943e+07	6.82734e+07	6.49753e+07	6.86965e+07	5.02088e+07	5.7755e+07	4.63148e+07	4.41679e+08	5.94583e+07	6.00656e+07	1.01275e+08	6.95254e+07	5.82262e+07	5.48606e+07	8.70799e+07	95614188	8.68888e+07	6.6951e+07	1.45672e+08	9.2616e+07	9.4589e+07	8.74795e+07	1.04146e+08	1.08424e+08	5.09792e+07	7.89756e+07	2.15614e+08	1.66756e+08	6.68624e+07	7.37869e+07	7.5261e+07	1.22909e+08	742.061	679.982	1114.76	707.795	753.537	1246.71	1010.31	1089.01	825.57	664.109	618.52	482.212	792.593	865.402	824.089
P46413	Glutathione synthetase OS=Rattus norvegicus GN=Gss PE=1 SV=1 - [GSHB_RAT]	52.3119	5.34295e+07	9.7466e+07	62753497	1.47664e+08	1.10482e+08	8.44582e+07	1.26584e+08	1.08111e+08	8.0307e+07	2.4485e+08	116025843	1.32803e+08	1.57511e+08	2.63397e+08	1.79144e+08	1.2534e+08	1.3662e+08	1.57776e+08	1.46102e+08	8.99467e+07	178284160	1.46772e+08	4.39269e+08	1.33926e+08	1.06713e+08	121806840	1.58105e+08	1.2198e+08	1.33319e+08	1.22031e+08	1.86433e+08	1.81175e+08	739.242	628.48	821.035	561.57	863.583	350.625	1151.64	941.884	503.18	586.731	627.072	702.265	631.471	661.385	588.364
Q8R4A1	ERO1-like protein alpha OS=Rattus norvegicus GN=Ero1l PE=1 SV=1 - [ERO1A_RAT]	53.984	1.54181e+08	1.00005e+08	1.9776e+08	150465966	2.09206e+08	1.1759e+08	1.991e+08	2.09e+08	1.85998e+08	1.91797e+08	2.1519e+08	2.65406e+08	2.54185e+08	8.02342e+07	3.14203e+08	3.97163e+08	285796042	3.00068e+08	293396048	2.9733e+08	3.2361e+08	2.79735e+08	3.54523e+08	365865527	2.47049e+08	3.13817e+08	2.81661e+08	2.91831e+08	3.33731e+08	3.16506e+08	3.94297e+08	3.56373e+08	738.429	666.267	1050.72	895.38	747.171	280.836	1109.05	1160.82	487.484	763.691	810.246	982.353	588.887	542.479	657.373
Q5U2U7	mRNA cap guanine-N7 methyltransferase OS=Rattus norvegicus GN=Rnmt PE=1 SV=1 - [MCES_RAT]	52.7833	4.33677e+07	2.91621e+07	5.85188e+07	7.18787e+07	43639372	4.48846e+07	1.37039e+08	6.08101e+07	4.67985e+07	4.42418e+07	4.14085e+07	8.12409e+08	2.8112e+07	33627424	5.49578e+07	3.82006e+07	3.96274e+07	5.56106e+07	4.25434e+07	4.00068e+07	4.10147e+07	3.28878e+07	4.98454e+07	6.48342e+07	3.8711e+07	2.67951e+07	3.60935e+07	7.563e+08	3.96575e+07	8.61935e+08	4.35374e+07	4.0727e+07	734.98	534.13	754.177	884.349	1137.34	499.135	1255.12	1018.41	509.093	623.306	236.511	493.231	649.388	644.467	368.027
P32038	Complement factor D OS=Rattus norvegicus OX=10116 GN=Cfd PE=1 SV=2 - [CFAD_RAT]	28.4242	1.25859e+08	1.13292e+08	1.41457e+08	1.50821e+08	1.49483e+08	1.58312e+08	1.40853e+08	1.35557e+08	2.36091e+08	1.90359e+08	2.35218e+08	2.42728e+08	2.39998e+08	2.52087e+08	2.8658e+08	3.091e+08	2.6738e+08	230112919	2.01362e+08	2.72554e+08	2.59172e+08	2.30567e+08	2.76394e+08	2.93567e+08	2.23077e+08	2.44992e+08	2.35866e+08	2.51218e+08	311835848	2.64968e+08	2.86425e+08	2.76946e+08	734.895	805.866	962.821	725.504	788.75	579.644	731.184	664.028	1048	894.849	820.67	896.839	718.461	797.833	897.363
Q568Z6	IST1 homolog OS=Rattus norvegicus GN=Ist1 PE=2 SV=1 - [IST1_RAT]	39.9166	6.05283e+07	7.81009e+07	8.41196e+07	1.05169e+08	1.01586e+08	1.11773e+08	8.95599e+07	8.15161e+07	7.52676e+07	5.95734e+07	7.69627e+07	8.27102e+07	1.18691e+08	8.77157e+07	102852688	1.16977e+08	9.16357e+07	5.08328e+07	1.02478e+08	1.12656e+08	1.53453e+08	1.3015e+08	1.40922e+08	1.37607e+08	1.05625e+08	1.13668e+08	9.24583e+07	1.13581e+08	9.68158e+07	1.13888e+08	1.53426e+08	1.346e+08	731.306	1006.93	986.201	881.262	991.007	890.77	861.611	1025.37	651.4	632.082	692.602	737.254	742.584	810.054	514.317
Q499N6	UBX domain-containing protein 1 OS=Rattus norvegicus GN=Ubxn1 PE=3 SV=2 - [UBXN1_RAT]	33.5611	1.46233e+08	8.60099e+07	1.48676e+08	8.9498e+07	8.61603e+07	6.44246e+07	4.48226e+07	5.75672e+07	1.44503e+08	1.69049e+08	9.96131e+07	1.25995e+08	1.09085e+08	8.82365e+07	1.11058e+08	1.38763e+08	1.7668e+08	1.25551e+08	121453972	1.42915e+08	1.44063e+08	1.15727e+08	1.71155e+08	1.26766e+08	1.46687e+08	1.58315e+08	1.3419e+08	1.22157e+08	1.34918e+08	1.78642e+08	1.21158e+08	1.18181e+08	730.648	544.958	506.393	463.935	314.158	246.155	554.919	408.655	884.582	735.317	671.843	594.662	454.115	497.368	507.166
P60901	Proteasome subunit alpha type-6 OS=Rattus norvegicus GN=Psma6 PE=1 SV=1 - [PSA6_RAT]	27.3818	1.29904e+08	2.95404e+08	2.80515e+08	3.81418e+08	3.75053e+08	4.56931e+08	1.90328e+08	1.28152e+08	3.42257e+08	3.1041e+08	3.62509e+08	3.85559e+08	5.27715e+08	4.49161e+08	5.31291e+08	462698891	4.2571e+08	3.79771e+08	546631664	5.42097e+08	649440153	5.68009e+08	6.63861e+08	7.22575e+08	4.5286e+08	5.26643e+08	4.91194e+08	466625797	5.50082e+08	6.35345e+08	7.17297e+08	7.17956e+08	730.258	1271.74	1360.44	1476.39	1973.23	1415.73	1110.57	777.384	1978.96	1875.07	1721.45	1971.31	1932.65	1652.51	1676.37
P50442	Glycine amidinotransferase, mitochondrial OS=Rattus norvegicus OX=10116 GN=Gatm PE=1 SV=1 - [GATM_RAT]	48.211	73661506	5.888e+07	8.64135e+07	8.57594e+07	9.16225e+07	7.3694e+07	110331091	1.028e+08	7.24002e+07	8.27478e+07	104301654	9.19735e+07	8.63972e+07	8.58105e+07	1.22118e+08	1.1327e+08	7.26156e+07	6.93639e+07	9.27046e+07	102962998	9.9596e+07	9.64169e+07	1.13888e+08	1.20784e+08	8.18333e+07	91015871	1.10524e+08	1.06263e+08	1.26689e+08	1.1273e+08	1.1136e+08	1.17974e+08	729.311	688.464	847.356	748.885	907.125	582.713	932.584	1053.79	529.495	929.503	597.63	835.801	721.579	585.952	705.067
O35806	Latent-transforming growth factor beta-binding protein 2 OS=Rattus norvegicus GN=Ltbp2 PE=1 SV=1 - [LTBP2_RAT]	189.742	4.41901e+07	8.80149e+07	4.19814e+07	3.78578e+07	3.33404e+07	4.24124e+07	1.29682e+08	6.72722e+07	5.03541e+07	3.04591e+07	4.4406e+07	4.55888e+07	9.24322e+07	3.66834e+07	4.58081e+07	3.15387e+07	49077234	3.81278e+07	5.97085e+07	4.21989e+07	1.0191e+08	5.00605e+07	36245460	5.20371e+07	5.14574e+07	5.43931e+07	4.36912e+07	6.58178e+07	6.13314e+07	1.38838e+08	6.36367e+07	7.58094e+07	727.739	677.316	648.533	576.59	711.217	438.761	750.779	645.791	519.204	485.335	407.59	532.747	336.022	333.596	287.532
P97834	COP9 signalosome complex subunit 1 OS=Rattus norvegicus GN=Gps1 PE=1 SV=1 - [CSN1_RAT]	53.3941	8.23731e+07	8.05806e+07	9.8684e+07	9.5047e+07	3.6331e+07	9.40225e+07	8.81867e+07	9.16633e+07	3.5401e+07	5.35546e+07	7.49133e+07	7.12532e+07	6.48883e+07	5.96211e+07	7.49502e+07	8.15014e+07	6.27424e+07	6.78994e+07	6.58542e+07	9.0244e+07	7.25493e+07	6.5132e+07	64113068	6.68528e+07	7.20189e+07	9.05586e+07	1.04808e+08	70460744	1.07602e+08	1.07036e+08	1.26486e+08	8.40197e+07	726.568	779.407	1059.6	757.392	494.144	449.264	824.848	895.656	312.638	376.611	327.639	640.655	469.684	514.772	596.48
P17046	Lysosome-associated membrane glycoprotein 2 OS=Rattus norvegicus OX=10116 GN=Lamp2 PE=1 SV=3 - [LAMP2_RAT]	45.1271	1.1779e+08	1.74659e+08	1.3339e+08	2.17456e+08	1.72542e+08	2.82104e+08	1.46894e+08	1.38082e+08	2.45513e+08	2.10568e+08	2.30033e+08	2.43681e+08	2.68735e+08	2.48655e+08	2.93809e+08	3.57305e+08	2.84334e+08	2.46089e+08	3.35823e+08	3.22087e+08	3.09566e+08	3.09216e+08	392708469	4.02579e+08	2.25789e+08	3.02174e+08	2.61729e+08	2.59491e+08	4.13322e+08	3.29987e+08	3.64716e+08	3.70792e+08	725.779	627.122	674.302	771.599	642.47	705.62	680.474	722.12	708.751	635.151	776.659	768.96	713.21	741.43	606.03
P70623	Fatty acid-binding protein, adipocyte OS=Rattus norvegicus OX=10116 GN=Fabp4 PE=1 SV=3 - [FABP4_RAT]	14.6986	1.19381e+08	1.37548e+08	1.39588e+08	1.64472e+08	1.37379e+08	158374199	1.50709e+08	1.72484e+08	2.06374e+08	1.92847e+08	2.24843e+08	2.24244e+08	2.18999e+08	2.2176e+08	2.78138e+08	2.7738e+08	3.07932e+08	3.24514e+08	3.44977e+08	3.35452e+08	4.00713e+08	3.49148e+08	4.44037e+08	4.41089e+08	1.82207e+08	1.976e+08	2.5844e+08	1.82811e+08	2.36363e+08	2.73899e+08	2.62932e+08	2.22606e+08	722.692	436.382	394.606	508.366	594.23	418.893	909.159	704.598	832.869	716.378	698.566	672.445	949.541	905.777	996.96
Q9JHB5	Translin-associated protein X OS=Rattus norvegicus GN=Tsnax PE=1 SV=1 - [TSNAX_RAT]	32.9846	4.7415e+07	6.44432e+07	7.91608e+07	7.11552e+07	6.38534e+07	78850140	9.04335e+07	8.17489e+07	5.68983e+07	6.57538e+07	5.92895e+07	6.0735e+07	7.67409e+07	4.09081e+07	6.69802e+07	6.68352e+07	6.92488e+07	8.42986e+07	7.81582e+07	8.57151e+07	1.17939e+08	6.89083e+07	9.83526e+07	71102182	7.04098e+07	7.74984e+07	1.19924e+08	8.68762e+07	1.11094e+08	1.14007e+08	1.10784e+08	1.27471e+08	718.116	869.145	1166.75	830.286	651.307	471.56	925.379	814.034	718.083	626.574	290.297	495.893	346.223	244.762	460.616
P34067	Proteasome subunit beta type-4 OS=Rattus norvegicus GN=Psmb4 PE=1 SV=2 - [PSB4_RAT]	29.1784	140789582	2.50597e+08	192586363	2.60346e+08	2.21892e+08	2.64306e+08	1.3725e+08	7.52437e+07	1.94324e+08	1.80914e+08	2.21199e+08	2.5842e+08	2.31091e+08	2.00461e+08	2.47596e+08	2.97553e+08	2.22689e+08	1.7355e+08	2.34417e+08	2.93534e+08	2.56959e+08	2.38886e+08	2.35087e+08	309529100	2.68935e+08	3.0347e+08	3.28902e+08	3.36191e+08	3.5123e+08	3.1177e+08	3.83832e+08	392441948	715.792	984.711	937.963	1012.13	1021.35	1091.85	661.081	536.608	776.841	1041.41	962.75	895.819	915.506	753.06	614.436
P83941	Transcription elongation factor B polypeptide 1 OS=Rattus norvegicus GN=Tceb1 PE=1 SV=1 - [ELOC_RAT]	12.465	1.17251e+08	8.9804e+07	1.16775e+08	1.10091e+08	1.27434e+08	7.66837e+07	8.53976e+07	1.37543e+08	1.04463e+08	1.03346e+08	9.71065e+07	1.24249e+08	1.05073e+08	93786509	1.1796e+08	1.50989e+08	1.39971e+08	1.06283e+08	1.28997e+08	1.31654e+08	1.45613e+08	1.32884e+08	1.30188e+08	1.33058e+08	95134415	9.40342e+07	1.20435e+08	9.46381e+07	1.07023e+08	128236453	1.05409e+08	1.12798e+08	714.857	452.516	814.115	533.149	633.259	396.283	632.946	837.216	729.936	809.139	538.264	822.134	560.728	421.896	700.893
Q99MC0	Protein phosphatase 1 regulatory subunit 14A OS=Rattus norvegicus OX=10116 GN=Ppp1r14a PE=1 SV=1 - [PP14A_RAT]	16.6867	5.63909e+07	1.11194e+08	4.7774e+07	7.86885e+07	5.13592e+07	1.02668e+08	4.79307e+07	6.05638e+07	1.01038e+08	9.67557e+07	7.47957e+07	8.18644e+07	7.21135e+07	6.83494e+07	9.17126e+07	2.18452e+08	1.04697e+08	6.31646e+07	9.4806e+07	9.36294e+07	8.7952e+07	8.84789e+07	1.04319e+08	1.22615e+08	6.68199e+07	7.76903e+07	9.1341e+07	1.06493e+08	6.98312e+07	104336671	1.04766e+08	8.74976e+07	713.537	1055.71	538.887	669.629	803.686	953.473	499.403	566.196	654.097	610.171	706.454	832.888	832.299	873.337	922.453
Q6MGD0	Protein CutA OS=Rattus norvegicus GN=Cuta PE=1 SV=2 - [CUTA_RAT]	18.6468	1.09157e+08	1.00578e+08	1.18888e+08	1.18388e+08	1.48655e+08	8.06013e+07	1.08092e+08	1.31012e+08	1.27776e+08	1.12995e+08	1.97012e+08	1.49932e+08	1.59323e+08	1.02604e+08	1.66681e+08	1.89998e+08	2.35389e+08	123630608	1.30904e+08	2.18548e+08	1.52611e+08	1.1708e+08	1.77155e+08	2.08473e+08	1.66713e+08	1.76417e+08	1.61565e+08	1.4796e+08	1.98904e+08	1.61445e+08	1.43093e+08	1.69093e+08	712.185	248.58	547.574	354.158	378.373	216.637	634.595	367.247	341.43	554.692	562.015	587.388	465.651	501.963	363
Q4V7C6	GMP synthase [glutamine-hydrolyzing] OS=Rattus norvegicus GN=Gmps PE=1 SV=1 - [GUAA_RAT]	76.7088	3.47794e+08	3.95932e+08	4.65404e+08	5.23919e+08	4.22827e+08	4.12074e+08	4.36848e+08	437906513	814115795	7.45286e+08	8.68879e+08	8.6898e+08	7.05075e+08	672636238	8.72135e+08	8.56344e+08	7.94653e+08	6.99375e+08	1.1141e+09	997952556	9.40679e+08	9.57438e+08	1.19598e+09	1.02824e+09	7.27797e+08	865845211	9.93717e+08	9.32385e+08	6.54885e+08	7.33572e+08	1.00726e+09	9.35398e+08	708.673	545.931	790.383	871.959	438.893	871.928	770.286	649.394	832.631	1051.66	1273.42	1177.48	990.08	1286.27	1206.56
O35263	Platelet-activating factor acetylhydrolase IB subunit gamma OS=Rattus norvegicus GN=Pafah1b3 PE=2 SV=1 - [PA1B3_RAT]	25.8473	6.46059e+07	7.23536e+07	9.49694e+07	1.05595e+08	8.51138e+07	8.60501e+07	8.95727e+07	9.53168e+07	8.882e+07	7.28382e+07	7.69845e+07	9.53704e+07	9.22617e+07	8.75962e+07	1.06334e+08	1.30498e+08	8.4865e+07	9.2317e+07	9.23145e+07	1.11119e+08	9.67581e+07	84131977	1.23098e+08	1.25839e+08	9.58216e+07	9.1804e+07	8.97385e+07	7.9063e+07	8.64984e+07	9.26906e+07	1.06362e+08	9.77392e+07	707.103	394.626	468.301	522.75	411.6	375.568	572.693	680.982	499.576	581.454	393.16	597.52	306.893	391.148	572.816
Q6IFV3	Keratin, type I cytoskeletal 15 OS=Rattus norvegicus GN=Krt15 PE=1 SV=1 - [K1C15_RAT]	48.8401	4.42152e+08	5.51062e+07	5.88215e+07	2.66232e+08	2.11334e+08	1.30479e+08	1.05618e+08	3.20596e+09	2.57727e+08	1.10493e+08	1.30803e+08	1.58665e+08	3.09393e+08	1.71555e+08	1.37963e+08	2.02915e+08	299414605	2.10718e+08	1.66472e+08	1.96261e+08	3.00665e+08	2.05896e+08	1.97163e+08	185409527	9.46519e+07	244882176	1.30007e+08	7.2993e+07	2.14186e+08	2.98303e+08	1.87813e+08	1.25231e+08	702.853	115.32	112.22	533.916	431.2	242.718	339.565	1079.19	352.768	143.601	184.673	273.131	356.184	234.716	244.005
Q4QQV8	Charged multivesicular body protein 5 OS=Rattus norvegicus OX=10116 GN=Chmp5 PE=2 SV=1 - [CHMP5_RAT]	24.5603	6.81596e+07	7.79226e+07	4.51213e+07	5.58313e+07	6.11481e+07	6.83781e+07	4.2427e+07	3.54121e+07	8.33314e+07	2.0149e+08	8.66423e+07	9.17703e+07	7.22942e+07	2.02101e+07	5.53488e+07	1.15349e+08	2.43086e+08	7.68759e+07	1.192e+08	7.43332e+07	6.58069e+07	6.32714e+07	1.57753e+08	7.09385e+07	1.17763e+08	1.57251e+08	1.0284e+08	6.90413e+07	7.53634e+07	1.07796e+08	4.56377e+07	61229033	701.126	640.298	547.282	515.634	457.44	234.089	230.77	343.885	458.466	645.861	290.834	520.187	289.125	347.065	269.229
Q5XI78	2-oxoglutarate dehydrogenase, mitochondrial OS=Rattus norvegicus GN=Ogdh PE=1 SV=1 - [ODO1_RAT]	116.221	6.23468e+07	1.33249e+08	8.76832e+07	1.89894e+08	5.91005e+07	2.43361e+08	7.49537e+07	6.93692e+07	2.23689e+08	1.52646e+08	2.15652e+08	1.79969e+08	2.62779e+08	2.17442e+08	1.99633e+08	2.3819e+08	2.42704e+08	1.65221e+08	3.05446e+08	3.08904e+08	3.26166e+08	2.66553e+08	2.85036e+08	3.47106e+08	208695734	2.36955e+08	1.70289e+08	1.83322e+08	1.90255e+08	1.95452e+08	2.96141e+08	2.83177e+08	693.545	2536.57	1669.79	2736.62	651.825	2806.85	1307.77	1162.52	3065.44	2694.89	2614.15	2562.72	2678.69	2792.06	2133.73
Q9R0J8	Legumain OS=Rattus norvegicus GN=Lgmn PE=1 SV=1 - [LGMN_RAT]	49.4344	8.27191e+07	8.19439e+07	2.08087e+08	1.19744e+08	2.13786e+08	1.01738e+08	1.88701e+08	2.09534e+08	340310447	2.84135e+08	3.38145e+08	3.3059e+08	3.86614e+08	3.13629e+08	3.86044e+08	4.68173e+08	4.65455e+08	3.08042e+08	4.45189e+08	4.56784e+08	4.83487e+08	4.36918e+08	4.81151e+08	4.81233e+08	3.30423e+08	4.31108e+08	3.59381e+08	3.46069e+08	4.41823e+08	4.03801e+08	4.18774e+08	3.72779e+08	693.508	457.773	635.656	529.907	580.454	381.405	571.413	857.814	1034.22	1135.07	1042.73	1366.51	694.152	942.724	815.882
Q5FVF9	Biotinidase OS=Rattus norvegicus OX=10116 GN=Btd PE=2 SV=1 - [BTD_RAT]	57.9835	5.99363e+07	4.26438e+07	7.17235e+07	6.31276e+07	6.29047e+07	4.12361e+07	7.42106e+07	6.63253e+07	6.91347e+07	7.01121e+07	67491661	7.99043e+07	5.65425e+07	76662405	1.06496e+08	8.2212e+07	7.77183e+07	5.48876e+07	8.62743e+07	87255517	5.9274e+07	69794905	9.14581e+07	9.31946e+07	6.45015e+07	8.00539e+07	7.26393e+07	8.14796e+07	1.1101e+08	9.95627e+07	1.08916e+08	7.52062e+07	692.608	438.551	825.201	517.987	691.532	236.957	917.504	823.057	254.383	306.797	247.501	285.623	271.95	280.78	357.926
Q6DGG1	Protein ABHD14B OS=Rattus norvegicus GN=Abhd14b PE=2 SV=1 - [ABHEB_RAT]	22.6037	1.47129e+08	1.0908e+08	1.76698e+08	1.49979e+08	1.46008e+08	1.13146e+08	1.74731e+08	1.66117e+08	2.09371e+08	2.32457e+08	2.2595e+08	2.45724e+08	215497704	2.26851e+08	2.61556e+08	2.92725e+08	2.57608e+08	2.69354e+08	2.64915e+08	2.75763e+08	3.01149e+08	2.56432e+08	2.99335e+08	332098569	2.2191e+08	2.53052e+08	2.38642e+08	2.41678e+08	2.88298e+08	2.84788e+08	2.7793e+08	2.78415e+08	689.49	423.214	688.161	402.614	448.348	216.368	525.173	538.767	528.145	591.961	547.423	711.789	573.775	607.232	588.473
P05371	Clusterin OS=Rattus norvegicus GN=Clu PE=1 SV=2 - [CLUS_RAT]	51.3423	9.39622e+07	9.20511e+07	6.54672e+07	9.36399e+07	7.64535e+07	1.06736e+08	9.80469e+07	1.03323e+08	2.16865e+08	1.91837e+08	2.14731e+08	2.2344e+08	2.42648e+08	2.13814e+08	2.4257e+08	2.91214e+08	2.16209e+08	166918226	2.20497e+08	251835658	2.83321e+08	2.1959e+08	2.73802e+08	2.86106e+08	1.98197e+08	2.01854e+08	1.95947e+08	1.54817e+08	234168488	2.55793e+08	2.01695e+08	2.68622e+08	687.147	541.437	592.243	739.842	690.95	626.045	748.012	400.109	877.763	1098.18	698.185	903.006	1072.3	952.425	863.081
P05982	NAD(P)H dehydrogenase [quinone] 1 OS=Rattus norvegicus GN=Nqo1 PE=1 SV=4 - [NQO1_RAT]	30.927	1.10299e+08	366979159	4.81956e+08	1.22882e+08	5.50534e+08	5.73824e+08	1.55115e+08	589042303	3.28823e+08	307211398	2.57835e+08	3.44495e+08	2.66206e+08	2.26655e+08	285372237	1.26293e+09	4.11522e+08	3.54199e+08	3.38739e+08	3.55467e+08	3.36525e+08	2.95596e+08	1.45828e+09	1.43978e+09	361110090	3.08846e+08	2.79334e+08	2.95391e+08	3.1755e+08	3.12841e+08	3.54745e+08	1.32135e+09	685.134	741.338	849.44	1112.88	1027.24	745.079	1273.12	1287.32	2103.08	1981.02	2074.5	1741.71	1675.36	1662.45	1758.22
Q5M7A7	CB1 cannabinoid receptor-interacting protein 1 OS=Rattus norvegicus GN=Cnrip1 PE=1 SV=1 - [CNRP1_RAT]	18.6466	9.14629e+07	8.99e+07	1.01623e+08	1.1417e+08	1.0108e+08	1.13537e+08	1.15079e+08	1.06447e+08	1.07718e+08	88597409	1.1161e+08	1.035e+08	1.11498e+08	9.81514e+07	135907580	1.51535e+08	1.26327e+08	1.09044e+08	1.37893e+08	1.25333e+08	1.48434e+08	1.24606e+08	1.55883e+08	1.44022e+08	1.0298e+08	1.12291e+08	1.09539e+08	1.10036e+08	1.24712e+08	1.25464e+08	159039251	1.23032e+08	683.075	333.19	628.308	558.185	560.426	423.82	588.108	621.186	439.896	480.585	468.602	516.181	482.97	349.92	459.198
Q5XIE6	3-hydroxyisobutyryl-CoA hydrolase, mitochondrial OS=Rattus norvegicus OX=10116 GN=Hibch PE=1 SV=2 - [HIBCH_RAT]	42.9973	3.77355e+07	4.63978e+07	6.67853e+07	4.99786e+07	5.21588e+07	4.72036e+07	5.46005e+07	3.72147e+07	6.12278e+07	5.29501e+07	4.63961e+07	6.3697e+07	5.24413e+07	4.87081e+07	73192023	8.5546e+07	8.08217e+07	5.35518e+07	6.71072e+07	72110926	76350982	6.23638e+07	9.53871e+07	7.6739e+07	5.85809e+07	7.76961e+07	71741610	66347697	7.79364e+07	8.36513e+07	8.42576e+07	8.05188e+07	682.946	606.949	838.779	680.619	985.225	989.554	971.642	882.436	552.818	709.418	580.313	739.387	735.916	539.956	712.853
Q6IG05	Keratin, type II cytoskeletal 75 OS=Rattus norvegicus GN=Krt75 PE=3 SV=2 - [K2C75_RAT]	58.9906	4.00622e+08	7.51483e+07	8.7482e+07	2.97098e+08	2.61933e+08	2.32615e+08	133543724	2.9785e+09	2.86065e+08	1.73879e+08	1.44556e+08	190105229	3.24701e+08	2.03894e+08	1.46155e+08	2.55585e+08	4.63155e+08	2.79432e+08	2.71616e+08	2.92254e+08	3.71945e+08	2.7456e+08	3.29419e+08	2.02529e+08	1.31766e+08	368666748	1.69334e+08	1.13399e+08	3.29922e+08	2.84793e+08	1.80507e+08	1.25846e+08	681.601	220.257	76.81	473.991	533.865	279.416	386.305	1808.72	574.398	287.467	337.695	292.321	477.48	306.352	306.72
P13437	3-ketoacyl-CoA thiolase, mitochondrial OS=Rattus norvegicus GN=Acaa2 PE=2 SV=1 - [THIM_RAT]	41.8445	50621720	9.52379e+07	7.1968e+07	9.57945e+07	2.85464e+07	1.26538e+08	60728500	5.08802e+07	8.69478e+07	7.64421e+07	6.74652e+07	6.86395e+07	103538026	8.06433e+07	6.2838e+07	1.13697e+08	1.53005e+08	1.16976e+08	2.01102e+08	2.03122e+08	2.33816e+08	1.76762e+08	2.19536e+08	2.3173e+08	1.17095e+08	1.2282e+08	1.23374e+08	1.09974e+08	101793266	131550625	1.73149e+08	1.74297e+08	681.004	827.676	806.804	768.431	159.03	925.169	470.978	471.693	476.581	398.88	442.876	398.54	465.738	547.926	228.855
Q6IMF3	Keratin, type II cytoskeletal 1 OS=Rattus norvegicus GN=Krt1 PE=2 SV=1 - [K2C1_RAT]	64.7911	7.03823e+08	1.47291e+08	1.27124e+08	4.39601e+08	5.30857e+08	1.98276e+08	1.56991e+08	3.83877e+09	4.97494e+08	3.89187e+08	2.90937e+08	2.83171e+08	3.71452e+08	2.20979e+08	193132944	224159844	1.02576e+09	5.43597e+08	2.71064e+08	2.19556e+08	7.44946e+08	3.45177e+08	4.2516e+08	3.11548e+08	2.98727e+08	7.46111e+08	1.71206e+08	1.06976e+08	5.60689e+08	330234372	1.2617e+08	1.53692e+08	676.358	45.723	37.8219	335.311	675.453	306.66	60.5022	1536.54	171.508	104.421	133.821	143.892	389.422	351.455	132.181
P12928	Pyruvate kinase PKLR OS=Rattus norvegicus GN=Pklr PE=2 SV=2 - [KPYR_RAT]	62.1615	1.94788e+08	2.2185e+08	2.57178e+08	2.9339e+08	2.56566e+08	4.93272e+08	2.46711e+08	1.79858e+08	2.28304e+08	7.11745e+08	4.87485e+08	3.05085e+08	835928285	802310227	4.17756e+08	3.53868e+08	3.22498e+08	6.95377e+08	1.1089e+09	5.19029e+08	1163347279	5.39481e+08	662716587	1252972958	905437154	9.28082e+08	4.69224e+08	3.79538e+08	9.76088e+08	5.22449e+08	1.22935e+09	6.45486e+08	676.046	389.887	582.188	361.052	470.7	257.328	618.552	466.24	161.38	137.287	161.34	160.677	135.22	131.05	213.083
O88761	26S proteasome non-ATPase regulatory subunit 1 OS=Rattus norvegicus GN=Psmd1 PE=2 SV=1 - [PSMD1_RAT]	105.681	4.36354e+07	9.62587e+07	5.82982e+07	9.41355e+07	2.30894e+07	1.33189e+08	4.53687e+07	4.00586e+07	8.57844e+07	7.11637e+07	7.21455e+07	8.4269e+07	9.84547e+07	8.29997e+07	9.74826e+07	1.47119e+08	102995763	7.81238e+07	1.2831e+08	1.59634e+08	1.42289e+08	1.38124e+08	1.24377e+08	1.72748e+08	1.11789e+08	1.39621e+08	138163076	1.45818e+08	1.16939e+08	1.49942e+08	1.83685e+08	1.63714e+08	674.222	1748.76	1021.66	1857.39	519.366	2443.28	862.741	1007.68	1263.32	1129.55	1182.3	1077.62	1252.87	1283.94	1071.29
Q4KM49	Tyrosine--tRNA ligase, cytoplasmic OS=Rattus norvegicus GN=Yars PE=2 SV=3 - [SYYC_RAT]	59.078	6.60508e+07	1.05739e+08	7.16656e+07	1.11766e+08	9.34934e+07	8.40779e+07	9.35313e+07	8.59591e+07	1.35606e+08	1.11699e+08	1.23459e+08	1.61469e+08	1.43584e+08	1.27651e+08	1.62903e+08	1.86232e+08	1.65928e+08	1.00945e+08	1.42892e+08	1.49829e+08	1.7733e+08	1.53819e+08	1.99069e+08	187309834	175358825	1.55578e+08	1.58647e+08	1.43544e+08	1.92549e+08	1.71651e+08	1.91178e+08	1.99069e+08	670.339	672.357	1170.71	867.791	1017.71	788.958	1618.72	1635.6	749.91	919.886	757.093	758.951	1174.95	1005.18	1013.67
Q3T1I4	Protein PRRC1 OS=Rattus norvegicus GN=Prrc1 PE=2 SV=1 - [PRRC1_RAT]	46.2656	1.16305e+08	8.66726e+07	1.58344e+08	1.13351e+08	1.12489e+08	1.24162e+08	1.47386e+08	124056093	1.04402e+08	8.9894e+07	1.45793e+08	1.37781e+08	183926188	1.52972e+08	1.75334e+08	2.09385e+08	2.23308e+08	1.61447e+08	230135785	2.48245e+08	2.25693e+08	1.6464e+08	1.53858e+08	1.93493e+08	1.84834e+08	2.07312e+08	2.2356e+08	1.56482e+08	1.64313e+08	1.81038e+08	2.34085e+08	1.7794e+08	669.825	697.434	1086.46	897.467	985.049	810.25	1198.79	994.977	660.171	1025.81	778.701	943.299	865.355	938.55	835.746
O89046	Coronin-1B OS=Rattus norvegicus GN=Coro1b PE=1 SV=1 - [COR1B_RAT]	53.811	7.06171e+07	192283986	1.58309e+08	2.63314e+08	3.87137e+07	2.28337e+08	1.48148e+08	2.74057e+08	214411842	1.45042e+08	2.54129e+08	1.84261e+08	1.76089e+08	1.47203e+08	1.97389e+08	2.03778e+08	1.97115e+08	1.13876e+08	2.40892e+08	2.29168e+08	2.15448e+08	2.02769e+08	2.1638e+08	2.42009e+08	2.2534e+08	236081417	2.6156e+08	2.38879e+08	2.29021e+08	2.47034e+08	2.77082e+08	2.75259e+08	668.983	1468.61	1351.54	1463.17	369.296	1581.23	1378.38	901.868	1326.96	1318.34	957.865	1181.52	1262.13	1137.63	923.483
P62747	Rho-related GTP-binding protein RhoB OS=Rattus norvegicus GN=Rhob PE=1 SV=1 - [RHOB_RAT]	22.1091	3.01627e+08	2.25486e+08	2.16616e+08	3.4906e+08	383484351	3.56851e+08	344573561	3.8954e+08	4.60356e+08	4.02748e+08	408145422	4.30391e+08	5.71973e+08	5.55439e+08	4.62449e+08	981853490	6.76516e+08	6.26132e+08	6.34892e+08	4.32158e+08	1071111961	6.45804e+08	6.58065e+08	7.2246e+08	474555883	5.84815e+08	587201824	5.24931e+08	4.93501e+08	8.15916e+08	5.43605e+08	7.37334e+08	667.459	706.808	735.223	797.503	1030.79	864.876	786.221	1047.56	1079.08	855.799	926.212	733.003	1100.17	843.035	951.103
Q62636	Ras-related protein Rap-1b OS=Rattus norvegicus GN=Rap1b PE=2 SV=2 - [RAP1B_RAT]	20.7846	1.67397e+08	6.19029e+08	2.90939e+08	5.69725e+08	2.15039e+08	7.40352e+08	1.77077e+08	1.86195e+08	8.69334e+08	7.03585e+08	7.6255e+08	6.84285e+08	1.00229e+09	7.8639e+08	7.08475e+08	8.60754e+08	1.01274e+09	7.35204e+08	1.22066e+09	1.14161e+09	1.2006e+09	1.17531e+09	1.13129e+09	1.20055e+09	8.81291e+08	910303610	7.4128e+08	8.27061e+08	7.64665e+08	821641540	1.06767e+09	1.09742e+09	667.089	2278.7	1244.88	1673.68	680.616	2046.96	525.385	897.499	2094.41	1844.77	1659.91	1718.7	1996.97	1877.97	1397.1
Q4V7A0	WD repeat-containing protein 61 OS=Rattus norvegicus GN=Wdr61 PE=1 SV=1 - [WDR61_RAT]	33.7258	3.55133e+07	4.25866e+07	4.89476e+07	5.78654e+07	4.64191e+07	5.93606e+07	3.64642e+07	4.28711e+07	6.36037e+07	5.54219e+07	5.5871e+07	6.71741e+07	6.95207e+07	4.64913e+07	5.11074e+07	9.32334e+07	7.43273e+07	5.1756e+07	7.18032e+07	7.60637e+07	8.48273e+07	6.45081e+07	7.82385e+07	8.9244e+07	5.52913e+07	5.45672e+07	4.23066e+07	4.43761e+07	6.48043e+07	6.10853e+07	8.7184e+07	7.28849e+07	665.542	860.371	669.424	894.763	669.857	654.592	831.841	839.881	890.821	845.988	719.086	698.027	887.26	879.962	927.832
Q66H61	Glutamine--tRNA ligase OS=Rattus norvegicus OX=10116 GN=Qars PE=1 SV=1 - [SYQ_RAT]	87.6448	2.62459e+07	2.34894e+08	1.71003e+08	2.62191e+08	2.26484e+08	2.96826e+08	1.23194e+08	8.1159e+07	3.69665e+08	88118144	3.87803e+08	7.37592e+07	4.50525e+08	7.47689e+07	3.12933e+08	4.61751e+08	1.03312e+08	8.3283e+07	5.8969e+08	1.21517e+09	4.03163e+09	3.47438e+09	4.3185e+09	4.44836e+09	5.10259e+08	3768475416	8.71504e+08	4.74788e+08	3.21111e+08	1.00273e+08	4.18807e+09	6.70612e+08	664.726	716.221	723.09	691.902	345.068	758.013	797.308	819.004	965.097	869.638	676.3	870.143	904.409	704.138	905.795
O35820	2'-deoxynucleoside 5'-phosphate N-hydrolase 1 OS=Rattus norvegicus OX=10116 GN=Dnph1 PE=1 SV=1 - [DNPH1_RAT]	17.7698	1.1913e+08	5.62966e+07	1.15303e+08	8.45238e+07	9.05282e+07	0	5.88092e+07	1.11211e+08	1.38406e+08	1.30655e+08	1.54855e+08	1.1884e+08	151204750	1.17309e+08	1.841e+08	1.88339e+08	1.64503e+08	1.53773e+08	1.68856e+08	1.45703e+08	1.66605e+08	1.42485e+08	2.12884e+08	1.24084e+08	1.47795e+08	1.39234e+08	1.54304e+08	146162629	1.52896e+08	1.88656e+08	1.65719e+08	1.51924e+08	663.139	337.102	665.536	426.557	529.024		455.846	383.347	426.625	689.165	488.214	530.795	316.532	536.324	450.828
Q5QJC9	BAG family molecular chaperone regulator 5 OS=Rattus norvegicus GN=Bag5 PE=1 SV=1 - [BAG5_RAT]	50.9985	3.12815e+07	48302042	3.2163e+07	4.88294e+07	3.95354e+07	6.58938e+07	3.89327e+07	3.21925e+07	5.01025e+07	4.51232e+07	5.35862e+07	5.52583e+07	5.36609e+07	5.18401e+07	6.71276e+07	7.70812e+07	5.97143e+07	4.17043e+07	7.20446e+07	7.81845e+07	8.75108e+07	6.11623e+07	8.9808e+07	8.08537e+07	5.37426e+07	6.58092e+07	5.60399e+07	5.95734e+07	7.22633e+07	7.97287e+07	7.17855e+07	6.65693e+07	659.729	693.596	789.781	540.911	564.877	625.055	484.002	528.547	634.381	508.904	391.52	685.79	714.961	639.489	567.889
Q63692	Hsp90 co-chaperone Cdc37 OS=Rattus norvegicus GN=Cdc37 PE=1 SV=2 - [CDC37_RAT]	44.4819	2.04376e+08	2.39776e+08	2.52767e+08	3.0411e+08	2.69825e+08	2.21486e+08	2.39279e+08	1.75206e+08	3.55398e+08	3.01997e+08	3.32881e+08	3.9418e+08	3.56285e+08	2.84757e+08	368754496	4.4188e+08	3.90309e+08	3.21396e+08	4.35434e+08	449153898	4.54805e+08	3.88719e+08	453881590	4.20359e+08	3.71744e+08	3.98077e+08	3.63604e+08	3.41764e+08	3.62565e+08	4.27588e+08	4.6594e+08	4.272e+08	659.287	554.66	759.761	600.975	719.516	520.538	684.757	881.008	796.489	861.943	658.733	909.996	800.978	684.495	749.942
Q62733	Lamina-associated polypeptide 2, isoform beta OS=Rattus norvegicus GN=Tmpo PE=1 SV=3 - [LAP2_RAT]	50.2471	7.11983e+07	9.02689e+07	5.38037e+07	6.15164e+07	3.845e+07	4.2522e+07	4.54301e+07	4.47141e+08	7.21347e+07	8.5913e+07	6.12537e+07	99094870	4.16054e+07	2.08543e+07	0	1.08239e+09	8.68612e+07	8.21541e+07	6.56986e+07	3.37039e+07	6.96574e+07	48860721	2.69239e+07	5.81464e+07	6.78893e+07	4.07305e+07	2.3343e+06	6.24375e+07	71805699	3.06464e+07	0	0	658.109	431.939	392.148	300.986	242.836	395.585	124.843	234.336	426.745	413.272	106.23	152.48	155.766	112.064
P85970	Actin-related protein 2/3 complex subunit 2 OS=Rattus norvegicus GN=Arpc2 PE=1 SV=1 - [ARPC2_RAT]	34.3695	1.3689e+08	2.65751e+08	1.41753e+08	2.59254e+08	9.2824e+07	3.79868e+08	146398900	1.56006e+08	2.60894e+08	2.0593e+08	2.28993e+08	2.34115e+08	3.30582e+08	2.40101e+08	231293360	2.78377e+08	2.82298e+08	1.984e+08	3.91621e+08	3.43066e+08	4.17858e+08	3.40159e+08	2.90613e+08	3.56881e+08	3.6586e+08	3.65487e+08	2.72634e+08	3.14645e+08	3.0984e+08	2.91539e+08	4.49718e+08	4.40657e+08	654.516	1456.9	832.468	1206.6	598.817	1528.63	777.313	602.011	1064.59	960.975	940.546	1062.96	1327.35	1202.14	1094.49
Q64560	Tripeptidyl-peptidase 2 OS=Rattus norvegicus GN=Tpp2 PE=2 SV=3 - [TPP2_RAT]	138.206	4.433e+07	5.86919e+07	6.71016e+07	7.50728e+07	6.3082e+07	6.65726e+07	5.47319e+07	5.68899e+07	59189643	6.68521e+07	6.34062e+07	5.74035e+07	6.55738e+07	6.06011e+07	7.29956e+07	79282049	62835887	6.01292e+07	8.93997e+07	7.84615e+07	7.97284e+07	6.97258e+07	8.74177e+07	9.62872e+07	7.48353e+07	8.07549e+07	1.01605e+08	7.9498e+07	8.40444e+07	8.57513e+07	101412237	9.25626e+07	654.229	1080.34	1004.7	836.334	946.835	840.168	1360.4	930.227	945.292	1051.46	732.925	758.955	913.792	888.613	927.769
P14272	Plasma kallikrein OS=Rattus norvegicus OX=10116 GN=Klkb1 PE=1 SV=1 - [KLKB1_RAT]	71.227	6.25967e+07	85975749	8.50638e+07	6.55845e+07	7.87482e+07	5.85305e+07	1.11362e+08	1.29615e+09	2.54577e+08	1.69862e+08	121698229	1.05813e+08	9.55204e+07	2.28479e+08	156295322	1.77472e+08	9.05328e+07	1.52583e+08	1.08868e+08	1.2428e+08	2.31608e+08	8.79173e+07	1.41876e+08	1.3631e+08	168803730	1.6518e+08	1.2042e+08	1.1937e+08	2.04991e+08	1.45627e+08	1.74122e+08	1.46661e+08	653.593	181.433	536.774	337.918	528.916	389.103	585.114	585.29	415.453	539.442	619.849	466.682	369.552	340.183	427.123
Q6AYS7	Aminoacylase-1A OS=Rattus norvegicus GN=Acy1a PE=1 SV=1 - [ACY1A_RAT]	45.7751	519355709	6.9219e+07	76969721	8.27709e+07	8.07642e+07	8.84788e+07	8.87434e+07	7.78974e+07	1.38402e+08	1.38846e+08	1.55401e+08	1.43393e+08	1.21923e+08	1.19411e+08	153654983	2.13761e+08	1.79729e+08	1.41898e+08	193998531	1.77493e+08	1.87191e+08	1.656e+08	1.81679e+08	2.25798e+08	1.38299e+08	1.69733e+08	1.55291e+08	1.6163e+08	186822234	1.90683e+08	1.39963e+08	1.56525e+08	650.279	258.774	870.109	754.612	921.768	391.449	1095.29	1221.44	1064.3	1078.68	989.908	1160.36	1114.21	1027.58	1128.17
Q4QRB4	Tubulin beta-3 chain OS=Rattus norvegicus GN=Tubb3 PE=1 SV=1 - [TBB3_RAT]	50.3862	1.17251e+08	3.68088e+08	162802686	3.60543e+08	1.30799e+08	590194110	1.09748e+08	1.52399e+08	5.27747e+08	5.2324e+08	4.42928e+08	4.31045e+08	7.01968e+08	5.98157e+08	4.27342e+08	6.71542e+08	9.72209e+08	7.92282e+08	1.28867e+09	1233438636	1.27176e+09	1.14211e+09	1.00052e+09	1.25535e+09	507032802	6.41871e+08	4.00434e+08	4.80787e+08	3.96237e+08	4.56579e+08	7.31029e+08	7.46183e+08	646.994	2447.94	874.945	1849.24	717.224	3486.36	646.14	1140.45	2785.85	3257.68	2692.82	2320.61	3419.27	3131.77	2111.41
Q6IG12	Keratin, type II cytoskeletal 7 OS=Rattus norvegicus GN=Krt7 PE=3 SV=1 - [K2C7_RAT]	50.678	1.9877e+08	1.38499e+08	2.37477e+08	2.09083e+08	2.15174e+08	2.49706e+09	1.89491e+08	1.54741e+09	2.64023e+08	2.37541e+08	2.88281e+08	2.95666e+08	2.60387e+08	2.26792e+08	3.02201e+09	3.2054e+09	3.43318e+08	2.74106e+08	3.80906e+08	4.07447e+08	3.36204e+08	3.07125e+08	4.88375e+08	4.64161e+09	1.98084e+08	2.54724e+08	2.36502e+08	2.36111e+08	1.8857e+08	2.82624e+08	2.64808e+08	2.44689e+08	646.733	456.183	512.235	445.983	498.252	487.472	171.758	1055.73	835.365	697.126	566.217	788.636	1090.78	1000.76	759.957
A2VCX1	TIP41-like protein OS=Rattus norvegicus OX=10116 GN=Tiprl PE=1 SV=1 - [TIPRL_RAT]	31.2046	9.54515e+07	3.86112e+07	1.03429e+08	1.12059e+08	1.03109e+08	71726735	1.14567e+08	1.14133e+08	8.9334e+07	6.87351e+07	7.83315e+07	8.0537e+07	6.54709e+07	9.23325e+07	116902178	1.11314e+08	7.38473e+07	8.851e+07	8.10794e+07	8.48744e+07	9.47645e+07	8.67377e+07	1.09896e+08	1.36238e+08	8.72196e+07	9.60879e+07	9.39686e+07	93058095	1.23044e+08	1.07133e+08	1.37761e+08	1.06169e+08	645.296	589.608	1059.89	880.321	848.377	554.555	1017.25	1191.74	590.339	635.704	623.984	755.865	627.747	604.91	462.199
G3V7W1	Programmed cell death protein 6 OS=Rattus norvegicus OX=10116 GN=Pdcd6 PE=2 SV=1 - [PDCD6_RAT]	21.8908	8.01577e+07	8.13402e+07	1.07388e+08	1.18765e+08	9.17197e+07	1.06231e+08	9.9762e+07	1.13701e+08	109491458	1.05538e+08	1.23709e+08	1.21451e+08	127441856	1.14529e+08	1.52775e+08	1.82672e+08	1.37052e+08	1.07592e+08	1.46507e+08	1.83664e+08	1.62303e+08	1.28345e+08	1.92407e+08	181715092	1.20686e+08	1.4551e+08	1.51105e+08	1.44418e+08	1.27074e+08	1.45044e+08	1.87408e+08	1.86581e+08	637.636	458.927	562.456	442.686	432.386	398.723	509.941	588.499	611.564	420.36	430.124	583.464	554.267	613.901	489.611
Q4QQR9	Protein MEMO1 OS=Rattus norvegicus GN=Memo1 PE=1 SV=1 - [MEMO1_RAT]	33.6575	52409406	4.62378e+07	5.19075e+07	6.58729e+07	58825490	5.14197e+07	6.5786e+07	6.45689e+07	5.22201e+07	4.56587e+07	5.94796e+07	62495445	6.33279e+07	2.89869e+07	5.53449e+07	55698306	5.81221e+07	5.51464e+07	6.47283e+07	6.18629e+07	5.56856e+07	6.10839e+07	7.96249e+07	7.09431e+07	4.60778e+07	4.83823e+07	6.20668e+07	6.91541e+07	7.01844e+07	6.4174e+07	6.57746e+07	5.50724e+07	636.413	486.157	706.116	590.874	691.375	387.231	546.613	856.367	477.961	321.859	260.771	398.141	251.131	211.89	351.884
[truncated: 2,126 more rows]
[truncated: 113 more columns]
